# Supplementary material for: Mutational Hotspots and Protein Interactome Analyses of Collagen-Specific Chaperone&mdash;HSP47
Source: Preprints.org preprint supplement (doi:10.20944/preprints201811.0280.v1), 2018-11-12
Supplement: Supplementary file 1 [file TableS1_HSP47_1000G.xlsx]

## Sheet: Sheet1
Variant ID	Chr: bp	Alleles	Global MAF	Class	Source	Evidence	Clin sig	Type	AA	AA coord	SIFT	PolyPhen
ss1341922792	11:7526821511:75268215	G/T	0.000 (T)	SNP	1KG_phase3	-	-	24 Upstream gene variant	-	-	-	-
rs138941725	11:7526821611:75268216	C/T	0.001 (T)	SNP	dbSNP	-	-	24 Upstream gene variant	-	-	-	-
ss1341922794	11:7526823311:75268233	G/T	0.000 (T)	SNP	1KG_phase3	-	-	24 Upstream gene variant	-	-	-	-
rs148017666	11:7526826511: between 75268265 & 75268266	-/ATGGGAC	-	insertion	dbSNP	Multiple_observations,	-	24 Upstream gene variant	-	-	-	-
rs182225631	11:7526826511: between 75268265 & 75268266	-/-/ATGGGAC	0.002 (C)	sequence_alteration	1KG_phase3	-	-	24 Upstream gene variant	-	-	-	-
rs182225631	11:7526826511:75268265	G/C/GATGGGAC	0.002 (C)	SNP	dbSNP	1000Genomes,	-	24 Upstream gene variant	-	-	-	-
rs182225631	11:7526826511:75268265	G/C/GATGGGAC	0.002 (C)	SNP	dbSNP	1000Genomes,	-	24 Upstream gene variant	-	-	-	-
rs368413942	11:7526826611: between 75268266 & 75268267	-/TGGGACA	-	insertion	dbSNP	-	-	24 Upstream gene variant	-	-	-	-
rs368199907	11:7526831111: between 75268311 & 75268312	-/GGAA	-	insertion	dbSNP	-	-	24 Upstream gene variant	-	-	-	-
rs188859716	11:7526833211:75268332	G/A	0.000 (A)	SNP	dbSNP	1000Genomes,	-	24 Upstream gene variant	-	-	-	-
rs674503	11:7526833711:75268337	C/T	0.219 (T)	SNP	dbSNP	Multiple_observations,Frequency,HapMap,1000Genomes,	-	24 Upstream gene variant	-	-	-	-
ss1341922798	11:7526836711:75268367	A/G	0.000 (G)	SNP	1KG_phase3	-	-	24 Upstream gene variant	-	-	-	-
ss1341922799	11:7526837111:75268371	G/A	0.000 (A)	SNP	1KG_phase3	-	-	24 Upstream gene variant	-	-	-	-
ss1341922800	11:7526838811:75268388	G/A	0.000 (A)	SNP	1KG_phase3	-	-	24 Upstream gene variant	-	-	-	-
rs150620561	11:7526841411:75268414	T/G	0.001 (G)	SNP	dbSNP	1000Genomes,	-	24 Upstream gene variant	-	-	-	-
ss1341922802	11:7526841711:75268417	C/A	0.000 (A)	SNP	1KG_phase3	-	-	24 Upstream gene variant	-	-	-	-
rs138848376	11:7526845811:75268458	C/T	-	SNP	dbSNP	1000Genomes,	-	24 Upstream gene variant	-	-	-	-
ss1341922803	11:7526849211:75268492	G/A	0.002 (A)	SNP	1KG_phase3	-	-	24 Upstream gene variant	-	-	-	-
rs192115647	11:7526853011:75268530	G/C	-	SNP	dbSNP	1000Genomes,	-	24 Upstream gene variant	-	-	-	-
rs34240240	11:7526853211:75268532	C/-	-	deletion	dbSNP	-	-	24 Upstream gene variant	-	-	-	-
rs12794874	11:7526855211:75268552	C/T	-	SNP	dbSNP	-	-	24 Upstream gene variant	-	-	-	-
ss1341922804	11:7526857211:75268572	G/T	0.000 (T)	SNP	1KG_phase3	-	-	24 Upstream gene variant	-	-	-	-
rs673482	11:7526860311:75268603	A/C	0.485 (C)	SNP	dbSNP	Multiple_observations,Frequency,HapMap,1000Genomes,	-	24 Upstream gene variant	-	-	-	-
rs3930046	11:7526863411:75268634	G/T	-	SNP	dbSNP	-	-	24 Upstream gene variant	-	-	-	-
ss1341922806	11:7526864511:75268645	G/C	0.001 (C)	SNP	1KG_phase3	-	-	24 Upstream gene variant	-	-	-	-
ss1341922807	11:7526865111:75268651	G/C	0.000 (C)	SNP	1KG_phase3	-	-	24 Upstream gene variant	-	-	-	-
rs608585	11:7526870411:75268704	G/A	0.120 (A)	SNP	dbSNP	Multiple_observations,Frequency,HapMap,1000Genomes,	-	24 Upstream gene variant	-	-	-	-
ss1341922809	11:7526871611:75268716	G/A	0.001 (A)	SNP	1KG_phase3	-	-	24 Upstream gene variant	-	-	-	-
ss1341922810	11:7526873411:75268734	G/C	0.000 (C)	SNP	1KG_phase3	-	-	24 Upstream gene variant	-	-	-	-
ss1371151984	11:7526876411:75268764-75268766	GAG/-	0.001 (-)	deletion	1KG_phase3	-	-	24 Upstream gene variant	-	-	-	-
ss1341922811	11:7526877711:75268777	C/T	0.001 (T)	SNP	1KG_phase3	-	-	24 Upstream gene variant	-	-	-	-
rs118101549	11:7526877811:75268778	G/A	0.000 (A)	SNP	dbSNP	Multiple_observations,1000Genomes,	-	24 Upstream gene variant	-	-	-	-
rs142023032	11:7526894911:75268949	C/A	0.008 (A)	SNP	dbSNP	Multiple_observations,1000Genomes,	-	24 Upstream gene variant	-	-	-	-
rs34220383	11:7526897711: between 75268977 & 75268978	-/T	-	insertion	dbSNP	-	-	24 Upstream gene variant	-	-	-	-
rs183635094	11:7526904111:75269041	G/A	0.000 (A)	SNP	dbSNP	1000Genomes,	-	24 Upstream gene variant	-	-	-	-
rs112597333	11:7526906711:75269067	G/A	0.040 (A)	SNP	dbSNP	Multiple_observations,1000Genomes,	-	24 Upstream gene variant	-	-	-	-
ss1341922816	11:7526907211:75269072	T/C	0.002 (C)	SNP	1KG_phase3	-	-	24 Upstream gene variant	-	-	-	-
rs7113189	11:7526909311:75269093	T/C	-	SNP	dbSNP	-	-	24 Upstream gene variant	-	-	-	-
rs114675358	11:7526912711:75269127	G/T	0.009 (T)	SNP	dbSNP	1000Genomes,	-	24 Upstream gene variant	-	-	-	-
rs146340774	11:7526914211:75269142	C/T	0.000 (T)	SNP	dbSNP	1000Genomes,	-	24 Upstream gene variant	-	-	-	-
rs74525999	11:7526914311:75269143	G/A	0.018 (A)	SNP	dbSNP	Multiple_observations,Frequency,1000Genomes,	-	24 Upstream gene variant	-	-	-	-
rs139688967	11:7526920011:75269200	C/A	0.006 (A)	SNP	dbSNP	1000Genomes,	-	24 Upstream gene variant	-	-	-	-
ss1341922821	11:7526925011:75269250	T/G	0.000 (G)	SNP	1KG_phase3	-	-	24 Upstream gene variant	-	-	-	-
ss1341922822	11:7526925211:75269252	G/C	0.000 (C)	SNP	1KG_phase3	-	-	24 Upstream gene variant	-	-	-	-
ss1341922823	11:7526925511:75269255	C/T	0.001 (T)	SNP	1KG_phase3	-	-	24 Upstream gene variant	-	-	-	-
ss1341922824	11:7526927311:75269273	C/T	0.000 (T)	SNP	1KG_phase3	-	-	24 Upstream gene variant	-	-	-	-
ss1341922825	11:7526927711:75269277	G/A	0.000 (A)	SNP	1KG_phase3	-	-	24 Upstream gene variant	-	-	-	-
ss1341922826	11:7526931611:75269316	C/G	0.000 (G)	SNP	1KG_phase3	-	-	24 Upstream gene variant	-	-	-	-
rs75641095	11:7526935811:75269358	C/T	0.009 (T)	SNP	dbSNP	Multiple_observations,Frequency,1000Genomes,	-	24 Upstream gene variant	-	-	-	-
rs188522191	11:7526938611:75269386	A/T	0.000 (T)	SNP	dbSNP	1000Genomes,	-	24 Upstream gene variant	-	-	-	-
rs191711404	11:7526940411:75269404	G/T	-	SNP	dbSNP	1000Genomes,	-	24 Upstream gene variant	-	-	-	-
rs200336288	11:7526945011: between 75269450 & 75269451	-/G	0.017 (G)	insertion	dbSNP	Multiple_observations,	-	24 Upstream gene variant	-	-	-	-
rs138532979	11:7526947211: between 75269472 & 75269473	-/GGGGGGGGG	-	insertion	dbSNP	-	-	24 Upstream gene variant	-	-	-	-
ss1341922829	11:7526947511:75269475	C/T	0.000 (T)	SNP	1KG_phase3	-	-	24 Upstream gene variant	-	-	-	-
ss1341922830	11:7526953511:75269535	C/T	0.000 (T)	SNP	1KG_phase3	-	-	24 Upstream gene variant	-	-	-	-
rs57074000	11:7526954311:75269543	G/A	0.024 (A)	SNP	dbSNP	Multiple_observations,Frequency,1000Genomes,	-	24 Upstream gene variant	-	-	-	-
ss1341922832	11:7526956111:75269561	A/G	0.001 (G)	SNP	1KG_phase3	-	-	24 Upstream gene variant	-	-	-	-
rs184065003	11:7526957311:75269573	C/T/G	-	SNP	dbSNP	1000Genomes,	-	24 Upstream gene variant	-	-	-	-
rs184065003	11:7526957311:75269573	C/T/G	-	SNP	dbSNP	1000Genomes,	-	24 Upstream gene variant	-	-	-	-
ss1341922834	11:7526958011:75269580	C/T	0.000 (T)	SNP	1KG_phase3	-	-	24 Upstream gene variant	-	-	-	-
ss1341922835	11:7526959611:75269596	G/C	0.000 (C)	SNP	1KG_phase3	-	-	24 Upstream gene variant	-	-	-	-
rs74622530	11:7526962711:75269627	T/G	0.018 (G)	SNP	dbSNP	Multiple_observations,Frequency,1000Genomes,	-	24 Upstream gene variant	-	-	-	-
ss1341922837	11:7526963011:75269630	C/T	0.000 (T)	SNP	1KG_phase3	-	-	24 Upstream gene variant	-	-	-	-
ss1341922838	11:7526964911:75269649	C/G	0.000 (G)	SNP	1KG_phase3	-	-	24 Upstream gene variant	-	-	-	-
rs370573449	11:7526965011:75269650	G/A	0.000 (A)	SNP	dbSNP	-	-	24 Upstream gene variant	-	-	-	-
rs111479611	11:7526970311:75269703	T/C	-	SNP	dbSNP	-	-	24 Upstream gene variant	-	-	-	-
ss1341922840	11:7526975411:75269754	T/G	0.000 (G)	SNP	1KG_phase3	-	-	24 Upstream gene variant	-	-	-	-
rs7936052	11:7526976411:75269764	T/C	0.093 (C)	SNP	dbSNP	Multiple_observations,Frequency,HapMap,1000Genomes,	-	24 Upstream gene variant	-	-	-	-
rs187233670	11:7526983611:75269836	T/C	0.000 (C)	SNP	dbSNP	1000Genomes,	-	24 Upstream gene variant	-	-	-	-
rs648903	11:7526985311:75269853	G/A	-	SNP	dbSNP	Multiple_observations,	-	24 Upstream gene variant	-	-	-	-
ss1341922843	11:7526986011:75269860	A/G	0.002 (G)	SNP	1KG_phase3	-	-	24 Upstream gene variant	-	-	-	-
rs150045882	11:7526988011:75269880	A/G	0.000 (G)	SNP	dbSNP	1000Genomes,	-	24 Upstream gene variant	-	-	-	-
ss1341922845	11:7526994211:75269942	C/A	0.002 (A)	SNP	1KG_phase3	-	-	24 Upstream gene variant	-	-	-	-
rs191266775	11:7526994411:75269944	C/A	0.000 (A)	SNP	dbSNP	1000Genomes,	-	24 Upstream gene variant	-	-	-	-
ss1341922847	11:7526998411:75269984	G/A	0.000 (A)	SNP	1KG_phase3	-	-	24 Upstream gene variant	-	-	-	-
ss1341922848	11:7527000011:75270000	G/C	0.000 (C)	SNP	1KG_phase3	-	-	24 Upstream gene variant	-	-	-	-
rs184366424	11:7527000911:75270009	C/T	0.000 (T)	SNP	dbSNP	1000Genomes,	-	24 Upstream gene variant	-	-	-	-
ss1341922850	11:7527001811:75270018	C/T	0.000 (T)	SNP	1KG_phase3	-	-	24 Upstream gene variant	-	-	-	-
ss1341922851	11:7527007011:75270070	G/A	0.000 (A)	SNP	1KG_phase3	-	-	24 Upstream gene variant	-	-	-	-
rs76141864	11:7527007111:75270071	T/G	0.016 (G)	SNP	dbSNP	Multiple_observations,Frequency,1000Genomes,	-	24 Upstream gene variant	-	-	-	-
rs144367315	11:7527014011:75270140	C/T	0.001 (T)	SNP	dbSNP	1000Genomes,	-	24 Upstream gene variant	-	-	-	-
ss1341922854	11:7527014411:75270144	A/T	0.000 (T)	SNP	1KG_phase3	-	-	24 Upstream gene variant	-	-	-	-
ss1341922855	11:7527019911:75270199	C/T	0.000 (T)	SNP	1KG_phase3	-	-	24 Upstream gene variant	-	-	-	-
ss1341922856	11:7527021511:75270215	G/A	0.000 (A)	SNP	1KG_phase3	-	-	24 Upstream gene variant	-	-	-	-
rs77788687	11:7527028111:75270281	C/G	0.018 (G)	SNP	dbSNP	Multiple_observations,Frequency,1000Genomes,	-	24 Upstream gene variant	-	-	-	-
rs372627674	11:7527028611:75270286	C/T	-	SNP	dbSNP	-	-	24 Upstream gene variant	-	-	-	-
ss1341922858	11:7527030811:75270308	A/C	0.001 (C)	SNP	1KG_phase3	-	-	24 Upstream gene variant	-	-	-	-
ss1341922859	11:7527035611:75270356	G/A	0.000 (A)	SNP	1KG_phase3	-	-	24 Upstream gene variant	-	-	-	-
rs74924661	11:7527037711:75270377	T/C	0.018 (C)	SNP	dbSNP	Multiple_observations,Frequency,1000Genomes,	-	24 Upstream gene variant	-	-	-	-
ss1341922861	11:7527039211:75270392	A/G	0.000 (G)	SNP	1KG_phase3	-	-	24 Upstream gene variant	-	-	-	-
ss1341922862	11:7527042111:75270421	T/C	0.000 (C)	SNP	1KG_phase3	-	-	24 Upstream gene variant	-	-	-	-
rs148797427	11:7527043211:75270432	C/T	0.005 (T)	SNP	dbSNP	1000Genomes,	-	24 Upstream gene variant	-	-	-	-
rs142044625	11:7527052211:75270522	G/C	0.002 (C)	SNP	dbSNP	Multiple_observations,1000Genomes,	-	24 Upstream gene variant	-	-	-	-
ss1341922865	11:7527059611:75270596	G/C	0.000 (C)	SNP	1KG_phase3	-	-	24 Upstream gene variant	-	-	-	-
rs114501326	11:7527061911:75270619	A/T	0.018 (T)	SNP	dbSNP	Multiple_observations,1000Genomes,	-	24 Upstream gene variant	-	-	-	-
rs190628952	11:7527062511:75270625	G/T	0.000 (T)	SNP	dbSNP	1000Genomes,	-	24 Upstream gene variant	-	-	-	-
ss1341922868	11:7527062711:75270627	G/A	0.000 (A)	SNP	1KG_phase3	-	-	24 Upstream gene variant	-	-	-	-
ss1341922869	11:7527063411:75270634	C/T	0.000 (T)	SNP	1KG_phase3	-	-	24 Upstream gene variant	-	-	-	-
rs115381388	11:7527067711:75270677	G/C	0.014 (C)	SNP	dbSNP	Multiple_observations,1000Genomes,	-	24 Upstream gene variant	-	-	-	-
rs147768141	11:7527068111:75270681	C/T	0.001 (T)	SNP	dbSNP	1000Genomes,	-	24 Upstream gene variant	-	-	-	-
ss1341922872	11:7527070311:75270703	G/A	0.000 (A)	SNP	1KG_phase3	-	-	24 Upstream gene variant	-	-	-	-
rs182250027	11:7527073511:75270735	C/A	0.000 (A)	SNP	dbSNP	1000Genomes,	-	24 Upstream gene variant	-	-	-	-
rs141158088	11:7527078911:75270789	C/G	0.001 (G)	SNP	dbSNP	1000Genomes,	-	24 Upstream gene variant	-	-	-	-
rs78964160	11:7527084411:75270844	C/T	0.000 (T)	SNP	dbSNP	Frequency,1000Genomes,	-	24 Upstream gene variant	-	-	-	-
rs371711649	11:7527085011:75270850	C/T	-	SNP	dbSNP	-	-	24 Upstream gene variant	-	-	-	-
ss1341922876	11:7527090911:75270909	G/A	0.000 (A)	SNP	1KG_phase3	-	-	24 Upstream gene variant	-	-	-	-
rs35532213	11:7527096711:75270967	G/-	-	deletion	dbSNP	-	-	24 Upstream gene variant	-	-	-	-
rs113283125	11:7527097011:75270970	G/A/C	-	SNP	dbSNP	-	-	24 Upstream gene variant	-	-	-	-
rs113283125	11:7527097011:75270970	G/A/C	-	SNP	dbSNP	-	-	24 Upstream gene variant	-	-	-	-
ss1341922878	11:7527101411:75271014	G/A	0.000 (A)	SNP	1KG_phase3	-	-	24 Upstream gene variant	-	-	-	-
rs376464655	11:7527107111:75271071	G/A	-	SNP	dbSNP	-	-	24 Upstream gene variant	-	-	-	-
ss1341922879	11:7527108611:75271086	G/T	0.000 (T)	SNP	1KG_phase3	-	-	24 Upstream gene variant	-	-	-	-
rs368744950	11:7527110911:75271109	G/A	0.000 (A)	SNP	dbSNP	-	-	24 Upstream gene variant	-	-	-	-
rs185194435	11:7527127111:75271271	T/G	0.000 (G)	SNP	dbSNP	1000Genomes,	-	24 Upstream gene variant	-	-	-	-
ss1341922882	11:7527133411:75271334	T/C	0.000 (C)	SNP	1KG_phase3	-	-	24 Upstream gene variant	-	-	-	-
ss1341922883	11:7527136111:75271361	G/A	0.000 (A)	SNP	1KG_phase3	-	-	24 Upstream gene variant	-	-	-	-
rs637676	11:7527141311:75271413	A/G	0.413 (A)	SNP	dbSNP	Multiple_observations,1000Genomes,	-	24 Upstream gene variant	-	-	-	-
ss1341922885	11:7527142411:75271424	C/T	0.000 (T)	SNP	1KG_phase3	-	-	24 Upstream gene variant	-	-	-	-
rs2082345	11:7527147811:75271478	C/T	0.014 (T)	SNP	dbSNP	Multiple_observations,Frequency,1000Genomes,	-	24 Upstream gene variant	-	-	-	-
ss1341922887	11:7527149111:75271491	C/A	0.000 (A)	SNP	1KG_phase3	-	-	24 Upstream gene variant	-	-	-	-
ss1341922888	11:7527157311:75271573	G/A	0.000 (A)	SNP	1KG_phase3	-	-	24 Upstream gene variant	-	-	-	-
ss1341922889	11:7527158811:75271588	G/A	0.000 (A)	SNP	1KG_phase3	-	-	24 Upstream gene variant	-	-	-	-
rs112637813	11:7527161611:75271616	C/T	-	SNP	dbSNP	-	-	24 Upstream gene variant	-	-	-	-
ss1341922890	11:7527162311:75271623	G/T	0.000 (T)	SNP	1KG_phase3	-	-	24 Upstream gene variant	-	-	-	-
rs7111265	11:7527165311:75271653	C/T	0.031 (T)	SNP	dbSNP	Multiple_observations,Frequency,1000Genomes,	-	24 Upstream gene variant	-	-	-	-
rs371083678	11:7527170911:75271709	G/A	-	SNP	dbSNP	-	-	24 Upstream gene variant	-	-	-	-
ss1341922892	11:7527176111:75271761	T/C	0.000 (C)	SNP	1KG_phase3	-	-	24 Upstream gene variant	-	-	-	-
ss1341922893	11:7527178811:75271788	C/A	0.000 (A)	SNP	1KG_phase3	-	-	24 Upstream gene variant	-	-	-	-
rs640264	11:7527179111:75271791	C/T	0.121 (T)	SNP	dbSNP	Multiple_observations,Frequency,HapMap,1000Genomes,	-	24 Upstream gene variant	-	-	-	-
rs3862803	11:7527181111:75271811	G/A	0.009 (A)	SNP	dbSNP	Multiple_observations,Frequency,HapMap,1000Genomes,	-	24 Upstream gene variant	-	-	-	-
rs640649	11:7527185111:75271851	G/A	0.084 (A)	SNP	dbSNP	Multiple_observations,Frequency,HapMap,1000Genomes,	-	24 Upstream gene variant	-	-	-	-
ss1341922897	11:7527187211:75271872	C/T	0.000 (T)	SNP	1KG_phase3	-	-	24 Upstream gene variant	-	-	-	-
rs188828886	11:7527200611:75272006	C/T	0.000 (T)	SNP	dbSNP	1000Genomes,	-	24 Upstream gene variant	-	-	-	-
ss1341922899	11:7527201011:75272010	G/A	0.000 (A)	SNP	1KG_phase3	-	-	24 Upstream gene variant	-	-	-	-
rs147599572	11:7527201811:75272018	T/G	0.004 (G)	SNP	dbSNP	Multiple_observations,1000Genomes,	-	24 Upstream gene variant	-	-	-	-
ss1341922901	11:7527210411:75272104	C/T	0.000 (T)	SNP	1KG_phase3	-	-	24 Upstream gene variant	-	-	-	-
ss1341922902	11:7527217011:75272170	G/A	0.000 (A)	SNP	1KG_phase3	-	-	24 Upstream gene variant	-	-	-	-
rs370722771	11:7527217211:75272172	A/G	-	SNP	dbSNP	-	-	24 Upstream gene variant	-	-	-	-
ss1341922903	11:7527219011:75272190	T/C	0.000 (C)	SNP	1KG_phase3	-	-	24 Upstream gene variant	-	-	-	-
ss1341922904	11:7527220611:75272206	C/T	0.000 (T)	SNP	1KG_phase3	-	-	24 Upstream gene variant	-	-	-	-
ss1341922905	11:7527225011:75272250	A/G	0.000 (G)	SNP	1KG_phase3	-	-	24 Upstream gene variant	-	-	-	-
rs151237108	11:7527228211: between 75272282 & 75272283	-/T	0.027 (T)	insertion	dbSNP	Multiple_observations,	-	24 Upstream gene variant	-	-	-	-
ss1341922906	11:7527230011:75272300	T/C	0.000 (C)	SNP	1KG_phase3	-	-	24 Upstream gene variant	-	-	-	-
ss1341922907	11:7527230111:75272301	C/A	0.000 (A)	SNP	1KG_phase3	-	-	24 Upstream gene variant	-	-	-	-
ss1341922908	11:7527233111:75272331	A/G	0.000 (G)	SNP	1KG_phase3	-	-	24 Upstream gene variant	-	-	-	-
rs3758775	11:7527233511:75272335	G/A	0.064 (A)	SNP	dbSNP	Multiple_observations,Frequency,1000Genomes,	-	24 Upstream gene variant	-	-	-	-
rs655602	11:7527233711:75272337	G/A	0.456 (A)	SNP	dbSNP	Multiple_observations,Frequency,HapMap,1000Genomes,	-	24 Upstream gene variant	-	-	-	-
rs375774992	11:7527240511:75272405	G/C	-	SNP	dbSNP	-	-	24 Upstream gene variant	-	-	-	-
rs623136	11:7527241111:75272411	G/T	0.456 (T)	SNP	dbSNP	Multiple_observations,Frequency,1000Genomes,	-	24 Upstream gene variant	-	-	-	-
rs140808486	11:7527241811:75272418	G/T	0.000 (T)	SNP	dbSNP	1000Genomes,	-	24 Upstream gene variant	-	-	-	-
rs150141389	11:7527242611:75272426	A/G	0.000 (G)	SNP	dbSNP	1000Genomes,	-	24 Upstream gene variant	-	-	-	-
ss1341922914	11:7527244411:75272444	T/C	0.000 (C)	SNP	1KG_phase3	-	-	24 Upstream gene variant	-	-	-	-
ss1341922915	11:7527246411:75272464	G/A	0.000 (A)	SNP	1KG_phase3	-	-	24 Upstream gene variant	-	-	-	-
rs35520556	11:7527251811:75272518	A/-	0.049 (-)	deletion	dbSNP	Multiple_observations,	-	24 Upstream gene variant	-	-	-	-
rs112627531	11:7527252711:75272527	A/G	-	SNP	dbSNP	-	-	24 Upstream gene variant	-	-	-	-
ss1341922916	11:7527258611:75272586	G/C	0.000 (C)	SNP	1KG_phase3	-	-	24 Upstream gene variant	-	-	-	-
ss1341922917	11:7527258711:75272587	G/A	0.000 (A)	SNP	1KG_phase3	-	-	24 Upstream gene variant	-	-	-	-
ss1341922918	11:7527259611:75272596	C/T	0.002 (T)	SNP	1KG_phase3	-	-	24 Upstream gene variant	-	-	-	-
rs147436502	11:7527261211:75272612-75272623	CAGCACCTTGCT/-	0.023 (-)	deletion	dbSNP	Multiple_observations,	-	24 Upstream gene variant	-	-	-	-
rs77592601	11:7527265311:75272653	C/T	0.040 (T)	SNP	dbSNP	Multiple_observations,Frequency,1000Genomes,	-	24 Upstream gene variant	-	-	-	-
CR064483	11:7527265311:75272653	HGMD_MUTATION	-	sequence_alteration	HGMD-PUBLIC	-	-	24 Upstream gene variant	-	-	-	-
ss1341922920	11:7527269211:75272692	G/A	0.000 (A)	SNP	1KG_phase3	-	-	24 Upstream gene variant	-	-	-	-
ss1341922921	11:7527269411:75272694	C/A	0.000 (A)	SNP	1KG_phase3	-	-	24 Upstream gene variant	-	-	-	-
rs667531	11:7527271611:75272716	C/G	0.281 (C)	SNP	dbSNP	Multiple_observations,Frequency,HapMap,1000Genomes,	-	24 Upstream gene variant	-	-	-	-
rs181582538	11:7527276511:75272765	C/T	0.000 (T)	SNP	dbSNP	1000Genomes,	-	24 Upstream gene variant	-	-	-	-
rs667961	11:7527279311:75272793	G/A	-	SNP	dbSNP	Multiple_observations,	-	24 Upstream gene variant	-	-	-	-
ss1341922924	11:7527281411:75272814	T/C	0.000 (C)	SNP	1KG_phase3	-	-	24 Upstream gene variant	-	-	-	-
ss1371152000	11:7527284911: between 75272849 & 75272850	-/C	0.001 (C)	insertion	1KG_phase3	-	-	24 Upstream gene variant	-	-	-	-
ss1341922925	11:7527285911:75272859	G/A	0.000 (A)	SNP	1KG_phase3	-	-	24 Upstream gene variant	-	-	-	-
ss1341922926	11:7527296811:75272968	G/A	0.000 (A)	SNP	1KG_phase3	-	-	24 Upstream gene variant	-	-	-	-
ss1341922927	11:7527302111:75273021	G/C	0.000 (C)	SNP	1KG_phase3	-	-	24 Upstream gene variant	-	-	-	-
ss1341922928	11:7527305611:75273056	C/T	0.000 (T)	SNP	1KG_phase3	-	-	24 Upstream gene variant	-	-	-	-
ss1371152003	11:7527313111:75273131	A/-	0.009 (-)	deletion	1KG_phase3	-	-	18 5 prime UTR variant Feature truncation	-	-	-	-
ss1341922929	11:7527314011:75273140	G/T	0.000 (T)	SNP	1KG_phase3	-	-	18 5 prime UTR variant	-	-	-	-
ss1341922930	11:7527315411:75273154	G/A	0.001 (A)	SNP	1KG_phase3	-	-	18 5 prime UTR variant	-	-	-	-
ss1341922931	11:7527318811:75273188	G/A	0.001 (A)	SNP	1KG_phase3	-	-	18 5 prime UTR variant	-	-	-	-
rs185295615	11:7527321011:75273210	G/A	0.006 (A)	SNP	dbSNP	1000Genomes,	-	18 5 prime UTR variant	-	-	-	-
ss1341922933	11:7527325711:75273257	G/C	0.000 (C)	SNP	1KG_phase3	-	-	18 5 prime UTR variant	-	-	-	-
rs112086221	11:7527331811:75273318	G/T	-	SNP	dbSNP	-	-	18 5 prime UTR variant	-	-	-	-
rs78251872	11:7527332611:75273326	G/A	0.035 (A)	SNP	dbSNP	Multiple_observations,Frequency,1000Genomes,	-	18 5 prime UTR variant	-	-	-	-
ss1341922935	11:7527339611:75273396	G/A	0.003 (A)	SNP	1KG_phase3	-	-	21 Intron variant	-	-	-	-
ss1341922936	11:7527345311:75273453	A/C	0.004 (C)	SNP	1KG_phase3	-	-	21 Intron variant	-	-	-	-
rs199898881	11:7527351111:75273511	G/-	0.004 (-)	deletion	dbSNP	-	-	21 Intron variant Feature truncation	-	-	-	-
ss1341922937	11:7527351611:75273516	C/T	0.004 (T)	SNP	1KG_phase3	-	-	21 Intron variant	-	-	-	-
ss1341922938	11:7527352111:75273521	G/A	0.000 (A)	SNP	1KG_phase3	-	-	21 Intron variant	-	-	-	-
rs372860269	11:7527353511:75273535	C/T	-	SNP	dbSNP	-	-	21 Intron variant	-	-	-	-
rs374185865	11:7527358311:75273583	G/A	0.001 (A)	SNP	dbSNP	-	-	21 Intron variant	-	-	-	-
rs190109537	11:7527359511:75273595	G/C	0.000 (C)	SNP	dbSNP	1000Genomes,	-	21 Intron variant	-	-	-	-
rs34808522	11:7527364611:75273646	A/-	-	deletion	dbSNP	-	-	21 Intron variant Feature truncation	-	-	-	-
ss1341922941	11:7527366911:75273669	A/G	0.000 (G)	SNP	1KG_phase3	-	-	21 Intron variant	-	-	-	-
rs113699890	11:7527371711:75273717	G/C	-	SNP	dbSNP	-	-	21 Intron variant	-	-	-	-
rs180875574	11:7527372811:75273728	C/G	0.002 (G)	SNP	dbSNP	1000Genomes,	-	21 Intron variant	-	-	-	-
ss1341922943	11:7527373011:75273730	G/A	0.000 (A)	SNP	1KG_phase3	-	-	21 Intron variant	-	-	-	-
rs377220268	11:7527374511:75273745	G/A	-	SNP	dbSNP	-	-	21 Intron variant	-	-	-	-
ss1341922944	11:7527375411:75273754	G/A	0.000 (A)	SNP	1KG_phase3	-	-	21 Intron variant	-	-	-	-
rs369733471	11:7527378411:75273784	C/T	-	SNP	dbSNP	-	-	21 Intron variant	-	-	-	-
ss1341922945	11:7527379111:75273791	C/T	0.000 (T)	SNP	1KG_phase3	-	-	21 Intron variant	-	-	-	-
rs374147271	11:7527379811:75273798	C/T	0.014 (T)	SNP	dbSNP	-	-	21 Intron variant	-	-	-	-
ss1341922947	11:7527380011:75273800	A/G	0.000 (G)	SNP	1KG_phase3	-	-	21 Intron variant	-	-	-	-
ss1341922948	11:7527386111:75273861	C/T	0.000 (T)	SNP	1KG_phase3	-	-	21 Intron variant	-	-	-	-
ss1341922949	11:7527389911:75273899	G/C	0.000 (C)	SNP	1KG_phase3	-	-	21 Intron variant	-	-	-	-
ss1341922950	11:7527390311:75273903	G/A	0.000 (A)	SNP	1KG_phase3	-	-	21 Intron variant	-	-	-	-
rs376324002	11:7527402711:75274027	G/A	0.000 (A)	SNP	dbSNP	-	-	21 Intron variant	-	-	-	-
ss1341922952	11:7527405711:75274057	T/C	0.000 (C)	SNP	1KG_phase3	-	-	21 Intron variant	-	-	-	-
rs11236457	11:7527406111:75274061	G/A	0.042 (A)	SNP	dbSNP	Multiple_observations,Frequency,1000Genomes,	-	21 Intron variant	-	-	-	-
ss1341922954	11:7527407111:75274071	G/A	0.000 (A)	SNP	1KG_phase3	-	-	21 Intron variant	-	-	-	-
rs590121	11:7527415011:75274150	G/T	0.357 (T)	SNP	dbSNP	Multiple_observations,Frequency,HapMap,1000Genomes,	-	21 Intron variant	-	-	-	-
rs3834442	11:7527415311: between 75274153 & 75274154	-/T	-	insertion	dbSNP	-	-	21 Intron variant Feature elongation	-	-	-	-
ss1341922956	11:7527416311:75274163	G/T	0.000 (T)	SNP	1KG_phase3	-	-	21 Intron variant	-	-	-	-
rs138629302	11:7527417811:75274178	T/C	0.000 (C)	SNP	dbSNP	1000Genomes,	-	21 Intron variant	-	-	-	-
rs80147742	11:7527421511:75274215	T/G	0.006 (G)	SNP	dbSNP	Multiple_observations,1000Genomes,	-	21 Intron variant	-	-	-	-
ss1341922959	11:7527422011:75274220	G/C	0.000 (C)	SNP	1KG_phase3	-	-	21 Intron variant	-	-	-	-
rs186123073	11:7527424311:75274243	G/C	0.000 (C)	SNP	dbSNP	1000Genomes,	-	21 Intron variant	-	-	-	-
ss1341922961	11:7527428211:75274282	G/A	0.000 (A)	SNP	1KG_phase3	-	-	21 Intron variant	-	-	-	-
rs7123719	11:7527432111:75274321	C/T	-	SNP	dbSNP	-	-	21 Intron variant	-	-	-	-
rs192234220	11:7527433611:75274336	C/G	0.001 (G)	SNP	dbSNP	1000Genomes,	-	21 Intron variant	-	-	-	-
rs113206982	11:7527435811:75274358	G/A	0.003 (A)	SNP	dbSNP	Multiple_observations,1000Genomes,	-	21 Intron variant	-	-	-	-
ss1341922964	11:7527438511:75274385	G/A	0.001 (A)	SNP	1KG_phase3	-	-	21 Intron variant	-	-	-	-
rs112689923	11:7527438811:75274388	C/T	-	SNP	dbSNP	-	-	21 Intron variant	-	-	-	-
ss1341922965	11:7527440011:75274400	C/T	0.000 (T)	SNP	1KG_phase3	-	-	21 Intron variant	-	-	-	-
ss1341922966	11:7527443111:75274431	C/T	0.000 (T)	SNP	1KG_phase3	-	-	21 Intron variant	-	-	-	-
ss1341922967	11:7527444911:75274449	C/G	0.000 (G)	SNP	1KG_phase3	-	-	21 Intron variant	-	-	-	-
rs184022342	11:7527454111:75274541	T/G	-	SNP	dbSNP	1000Genomes,	-	21 Intron variant	-	-	-	-
rs681390	11:7527463011:75274630	T/C	0.480 (C)	SNP	dbSNP	Multiple_observations,Frequency,HapMap,1000Genomes,	-	21 Intron variant	-	-	-	-
rs111567312	11:7527465911:75274659	G/A	0.022 (A)	SNP	dbSNP	Multiple_observations,1000Genomes,	-	21 Intron variant	-	-	-	-
rs589374	11:7527468711:75274687	C/A	0.246 (A)	SNP	dbSNP	Multiple_observations,Frequency,HapMap,1000Genomes,	-	21 Intron variant	-	-	-	-
rs187992902	11:7527469611:75274696	C/T	0.000 (T)	SNP	dbSNP	1000Genomes,	-	21 Intron variant	-	-	-	-
ss1341922972	11:7527469711:75274697	C/T	0.000 (T)	SNP	1KG_phase3	-	-	21 Intron variant	-	-	-	-
ss1341922973	11:7527470311:75274703	C/T	0.000 (T)	SNP	1KG_phase3	-	-	21 Intron variant	-	-	-	-
rs78860282	11:7527472511:75274725	T/C	0.010 (C)	SNP	dbSNP	Multiple_observations,Frequency,1000Genomes,	-	21 Intron variant	-	-	-	-
ss1341922975	11:7527473211:75274732	T/A	0.000 (A)	SNP	1KG_phase3	-	-	21 Intron variant	-	-	-	-
rs138800808	11:7527475511:75274755	C/T	0.001 (T)	SNP	dbSNP	1000Genomes,	-	21 Intron variant	-	-	-	-
rs190503530	11:7527478111:75274781	G/A	0.000 (A)	SNP	dbSNP	1000Genomes,	-	18 5 prime UTR variant	-	-	-	-
ss1341922978	11:7527481611:75274816	G/A	0.000 (A)	SNP	1KG_phase3	-	-	3 Splice donor variant	-	-	-	-
rs113200543	11:7527483811:75274838	T/C	-	SNP	dbSNP	-	-	21 Intron variant	-	-	-	-
ss1341922979	11:7527488811:75274888	C/G	0.002 (G)	SNP	1KG_phase3	-	-	21 Intron variant	-	-	-	-
ss1341922980	11:7527489211:75274892	C/G	0.000 (G)	SNP	1KG_phase3	-	-	21 Intron variant	-	-	-	-
rs111959930	11:7527490711:75274907	T/C	0.016 (C)	SNP	dbSNP	Multiple_observations,1000Genomes,	-	21 Intron variant	-	-	-	-
rs56102084	11:7527500411:75275004	T/C	0.012 (C)	SNP	dbSNP	Multiple_observations,Frequency,1000Genomes,	-	21 Intron variant	-	-	-	-
ss1341922983	11:7527501911:75275019	G/A	0.000 (A)	SNP	1KG_phase3	-	-	21 Intron variant	-	-	-	-
rs183069140	11:7527502711:75275027	C/T	0.002 (T)	SNP	dbSNP	Multiple_observations,1000Genomes,	-	21 Intron variant	-	-	-	-
ss1341922985	11:7527505411:75275054	A/G	0.000 (G)	SNP	1KG_phase3	-	-	21 Intron variant	-	-	-	-
ss1341922986	11:7527510111:75275101	A/G	0.000 (G)	SNP	1KG_phase3	-	-	21 Intron variant	-	-	-	-
rs376432771	11:7527512411:75275124	C/G	-	SNP	dbSNP	-	-	21 Intron variant	-	-	-	-
rs115526654	11:7527519111:75275191	G/C	0.009 (C)	SNP	dbSNP	1000Genomes,	-	21 Intron variant	-	-	-	-
rs141992338	11:7527522911:75275229	C/A	0.001 (A)	SNP	dbSNP	1000Genomes,	-	21 Intron variant	-	-	-	-
rs12275382	11:7527523611:75275236	C/T	0.034 (T)	SNP	dbSNP	Multiple_observations,Frequency,1000Genomes,	-	21 Intron variant	-	-	-	-
ss1341922990	11:7527523711:75275237	G/A	0.001 (A)	SNP	1KG_phase3	-	-	21 Intron variant	-	-	-	-
rs370896150	11:7527524911:75275249	T/C	0.002 (C)	SNP	dbSNP	-	-	21 Intron variant	-	-	-	-
rs112021099	11:7527525411:75275254	C/G	-	SNP	dbSNP	-	-	21 Intron variant	-	-	-	-
ss1341922992	11:7527528111:75275281	A/G	0.000 (G)	SNP	1KG_phase3	-	-	21 Intron variant	-	-	-	-
rs374303936	11:7527529011:75275290	C/T	0.001 (T)	SNP	dbSNP	-	-	21 Intron variant	-	-	-	-
rs615896	11:7527530111:75275301	T/C	0.346 (C)	SNP	dbSNP	Multiple_observations,Frequency,HapMap,1000Genomes,	-	21 Intron variant	-	-	-	-
ss1341922995	11:7527531211:75275312	C/T	0.001 (T)	SNP	1KG_phase3	-	-	21 Intron variant	-	-	-	-
rs376424621	11:7527533811:75275338	G/C	-	SNP	dbSNP	-	-	21 Intron variant	-	-	-	-
rs61895091	11:7527536511:75275365	C/T	-	SNP	dbSNP	-	-	21 Intron variant	-	-	-	-
rs186995991	11:7527539611:75275396	G/A	0.000 (A)	SNP	dbSNP	-	-	21 Intron variant	-	-	-	-
rs72991878	11:7527540011:75275400	G/A	0.012 (A)	SNP	dbSNP	Frequency,1000Genomes,	-	21 Intron variant	-	-	-	-
ss1341922998	11:7527542611:75275426	G/T	0.000 (T)	SNP	1KG_phase3	-	-	21 Intron variant	-	-	-	-
ss1341922999	11:7527547611:75275476	C/G	0.000 (G)	SNP	1KG_phase3	-	-	21 Intron variant	-	-	-	-
rs668347	11:7527547911:75275479	T/G	0.296 (T)	SNP	dbSNP	Multiple_observations,Frequency,1000Genomes,	-	21 Intron variant	-	-	-	-
rs146329629	11:7527549611:75275496	C/G	0.006 (G)	SNP	dbSNP	1000Genomes,	-	21 Intron variant	-	-	-	-
rs73505003	11:7527550411:75275504	C/T	0.034 (T)	SNP	dbSNP	Multiple_observations,Frequency,1000Genomes,	-	21 Intron variant	-	-	-	-
rs652054	11:7527553211:75275532	C/A	0.344 (A)	SNP	dbSNP	Multiple_observations,Frequency,HapMap,1000Genomes,	-	21 Intron variant	-	-	-	-
ss1341923004	11:7527555511:75275555	C/T	0.000 (T)	SNP	1KG_phase3	-	-	21 Intron variant	-	-	-	-
rs138327317	11:7527555811:75275558	A/G	0.001 (G)	SNP	dbSNP	Multiple_observations,1000Genomes,	-	21 Intron variant	-	-	-	-
ss1341923006	11:7527557211:75275572	A/C	0.000 (C)	SNP	1KG_phase3	-	-	21 Intron variant	-	-	-	-
ss1341923007	11:7527559311:75275593	A/C	0.000 (C)	SNP	1KG_phase3	-	-	21 Intron variant	-	-	-	-
rs3781728	11:7527563511:75275635	G/A	0.048 (A)	SNP	dbSNP	Multiple_observations,Frequency,HapMap,1000Genomes,	-	21 Intron variant	-	-	-	-
ss1341923009	11:7527568711:75275687	G/T	0.000 (T)	SNP	1KG_phase3	-	-	21 Intron variant	-	-	-	-
rs191946122	11:7527569211:75275692	G/A	0.000 (A)	SNP	dbSNP	1000Genomes,	-	21 Intron variant	-	-	-	-
ss1341923011	11:7527570011:75275700	G/A	0.001 (A)	SNP	1KG_phase3	-	-	21 Intron variant	-	-	-	-
ss1341923012	11:7527574811:75275748	G/C	0.001 (C)	SNP	1KG_phase3	-	-	21 Intron variant	-	-	-	-
rs589203	11:7527580811:75275808	C/T	0.337 (T)	SNP	dbSNP	Multiple_observations,Frequency,HapMap,1000Genomes,	-	21 Intron variant	-	-	-	-
ss1341923014	11:7527583511:75275835	T/G	0.000 (G)	SNP	1KG_phase3	-	-	21 Intron variant	-	-	-	-
ss1341923015	11:7527595811:75275958	T/C	0.000 (C)	SNP	1KG_phase3	-	-	21 Intron variant	-	-	-	-
ss1341923016	11:7527606711:75276067	A/C	0.002 (C)	SNP	1KG_phase3	-	-	21 Intron variant	-	-	-	-
ss1341923017	11:7527607011:75276070	C/T	0.002 (T)	SNP	1KG_phase3	-	-	21 Intron variant	-	-	-	-
ss1341923018	11:7527608411:75276084	G/T	0.000 (T)	SNP	1KG_phase3	-	-	21 Intron variant	-	-	-	-
ss1341923019	11:7527610611:75276106	A/G	0.000 (G)	SNP	1KG_phase3	-	-	21 Intron variant	-	-	-	-
rs11606352	11:7527611411:75276114	G/T	-	SNP	dbSNP	Multiple_observations,	-	21 Intron variant	-	-	-	-
ss1341923020	11:7527614811:75276148	G/A	0.000 (A)	SNP	1KG_phase3	-	-	21 Intron variant	-	-	-	-
rs606452	11:7527617811:75276178	A/C	0.304 (A)	SNP	dbSNP	Multiple_observations,Frequency,HapMap,1000Genomes,Cited,	-	21 Intron variant	-	-	-	-
ss1341923022	11:7527624811:75276248	G/T	0.000 (T)	SNP	1KG_phase3	-	-	21 Intron variant	-	-	-	-
rs184401543	11:7527625411:75276254	T/C	0.000 (C)	SNP	dbSNP	1000Genomes,	-	21 Intron variant	-	-	-	-
rs113806978	11:7527626911:75276269	A/C	0.000 (C)	SNP	dbSNP	-	-	21 Intron variant	-	-	-	-
ss1371152010	11:7527629111:75276291	G/-	0.002 (-)	deletion	1KG_phase3	-	-	21 Intron variant Feature truncation	-	-	-	-
ss1341923025	11:7527633911:75276339	C/G	0.000 (G)	SNP	1KG_phase3	-	-	21 Intron variant	-	-	-	-
rs372656541	11:7527635611:75276356	T/G	0.001 (G)	SNP	dbSNP	-	-	21 Intron variant	-	-	-	-
rs10614786	11:7527639311: between 75276393 & 75276394	-/CACA	-	insertion	dbSNP	-	-	21 Intron variant Feature elongation	-	-	-	-
ss1341923027	11:7527639411:75276394	G/T	0.000 (T)	SNP	1KG_phase3	-	-	21 Intron variant	-	-	-	-
ss1341923028	11:7527641611:75276416	T/C	0.000 (C)	SNP	1KG_phase3	-	-	21 Intron variant	-	-	-	-
ss1341923029	11:7527641811:75276418	T/C	0.000 (C)	SNP	1KG_phase3	-	-	21 Intron variant	-	-	-	-
ss1341923030	11:7527645311:75276453	T/C	0.000 (C)	SNP	1KG_phase3	-	-	21 Intron variant	-	-	-	-
rs653724	11:7527646711:75276467	G/A	0.338 (A)	SNP	dbSNP	Multiple_observations,Frequency,HapMap,1000Genomes,	-	21 Intron variant	-	-	-	-
ss1341923032	11:7527647211:75276472	C/T	0.000 (T)	SNP	1KG_phase3	-	-	21 Intron variant	-	-	-	-
ss1341923033	11:7527648611:75276486	C/T	0.002 (T)	SNP	1KG_phase3	-	-	21 Intron variant	-	-	-	-
rs73505007	11:7527648711:75276487	G/A	0.034 (A)	SNP	dbSNP	Multiple_observations,Frequency,1000Genomes,	-	21 Intron variant	-	-	-	-
ss1341923035	11:7527649911:75276499	G/T	0.000 (T)	SNP	1KG_phase3	-	-	21 Intron variant	-	-	-	-
rs75230041	11:7527654511:75276545	C/T	0.005 (T)	SNP	dbSNP	Multiple_observations,1000Genomes,	-	21 Intron variant	-	-	-	-
ss1341923037	11:7527661311:75276613	T/C	0.000 (C)	SNP	1KG_phase3	-	-	21 Intron variant	-	-	-	-
ss1341923038	11:7527664811:75276648	G/T	0.000 (T)	SNP	1KG_phase3	-	-	21 Intron variant	-	-	-	-
rs35096125	11:7527666111:75276661-75276664	ACAC/-	-	deletion	dbSNP	Multiple_observations,	-	21 Intron variant Feature truncation	-	-	-	-
rs143746709	11:7527666111:75276661-75276664	ACAC/-	0.307 (ACAC)	deletion	1KG_phase3	-	-	21 Intron variant Feature truncation	-	-	-	-
rs71964501	11:7527666211:75276662-75276665	CACA/-	-	deletion	dbSNP	Multiple_observations,	-	21 Intron variant Feature truncation	-	-	-	-
rs143746709	11:7527666411:75276664-75276667	CACA/-	0.307 (ACAC)	deletion	dbSNP	-	-	21 Intron variant Feature truncation	-	-	-	-
rs146654213	11:7527667311:75276673	A/T	-	SNP	dbSNP	-	-	21 Intron variant	-	-	-	-
rs603647	11:7527672111:75276721	C/T	0.298 (T)	SNP	dbSNP	Multiple_observations,Frequency,HapMap,1000Genomes,	-	21 Intron variant	-	-	-	-
rs604021	11:7527676911:75276769	G/C	0.339 (C)	SNP	dbSNP	Multiple_observations,Frequency,1000Genomes,	-	21 Intron variant	-	-	-	-
ss1341923041	11:7527677911:75276779	C/T	0.000 (T)	SNP	1KG_phase3	-	-	21 Intron variant	-	-	-	-
ss1341923042	11:7527678711:75276787	C/T	0.000 (T)	SNP	1KG_phase3	-	-	21 Intron variant	-	-	-	-
rs150672107	11:7527678811:75276788	G/A	0.002 (A)	SNP	dbSNP	Multiple_observations,1000Genomes,	-	21 Intron variant	-	-	-	-
rs114341844	11:7527680011:75276800	C/T	0.010 (T)	SNP	dbSNP	1000Genomes,	-	21 Intron variant	-	-	-	-
ss1341923045	11:7527680111:75276801	G/C	0.000 (C)	SNP	1KG_phase3	-	-	21 Intron variant	-	-	-	-
ss1341923046	11:7527681311:75276813	C/T	0.000 (T)	SNP	1KG_phase3	-	-	21 Intron variant	-	-	-	-
ss1341923047	11:7527686911:75276869	T/A	0.000 (A)	SNP	1KG_phase3	-	-	21 Intron variant	-	-	-	-
ss1341923048	11:7527687111:75276871	C/T	0.001 (T)	SNP	1KG_phase3	-	-	21 Intron variant	-	-	-	-
rs187685594	11:7527691511:75276915	C/T	0.000 (T)	SNP	dbSNP	-	-	21 Intron variant	-	-	-	-
rs192757965	11:7527691611:75276916	C/T	0.000 (T)	SNP	dbSNP	1000Genomes,	-	21 Intron variant	-	-	-	-
rs185419773	11:7527699511:75276995	T/C	0.001 (C)	SNP	dbSNP	1000Genomes,	-	21 Intron variant	-	-	-	-
rs139920229	11:7527700811:75277008	C/T	0.000 (T)	SNP	dbSNP	1000Genomes,	-	21 Intron variant	-	-	-	-
ss1341923053	11:7527701911:75277019	G/C	0.001 (C)	SNP	1KG_phase3	-	-	21 Intron variant	-	-	-	-
ss1341923054	11:7527703511:75277035	C/G	0.000 (G)	SNP	1KG_phase3	-	-	21 Intron variant	-	-	-	-
ss1341923055	11:7527703911:75277039	C/T	0.000 (T)	SNP	1KG_phase3	-	-	21 Intron variant	-	-	-	-
rs369075671	11:7527719911:75277199	C/A	-	SNP	dbSNP	-	-	21 Intron variant	-	-	-	-
rs367628434	11:7527720011:75277200	C/G	0.000 (G)	SNP	dbSNP	-	-	21 Intron variant	-	-	-	-
rs149846715	11:7527721911:75277219	C/G	0.001 (G)	SNP	dbSNP	1000Genomes,	-	21 Intron variant	-	-	-	-
rs147548875	11:7527725811:75277258	G/A	0.002 (A)	SNP	dbSNP	1000Genomes,	-	21 Intron variant	-	-	-	-
rs76649778	11:7527726211:75277262	C/T	0.006 (T)	SNP	dbSNP	Multiple_observations,Frequency,1000Genomes,	-	21 Intron variant	-	-	-	-
ss1341923060	11:7527727011:75277270	A/G	0.001 (G)	SNP	1KG_phase3	-	-	21 Intron variant	-	-	-	-
rs189348278	11:7527729511:75277295	T/C	0.001 (C)	SNP	dbSNP	Multiple_observations,1000Genomes,	-	21 Intron variant	-	-	-	-
ss1341923062	11:7527730411:75277304	T/C	0.000 (C)	SNP	1KG_phase3	-	-	21 Intron variant	-	-	-	-
rs375603549	11:7527730611:75277306	G/A	0.001 (A)	SNP	dbSNP	-	-	21 Intron variant	-	-	-	-
ss1341923064	11:7527733611:75277336	C/T	0.000 (T)	SNP	1KG_phase3	-	-	21 Intron variant	-	-	-	-
ss1341923065	11:7527735111:75277351	A/G	0.000 (G)	SNP	1KG_phase3	-	-	21 Intron variant	-	-	-	-
rs201848361	11:7527737011:75277370	G/A	-	SNP	dbSNP	Frequency,	-	18 5 prime UTR variant	-	-	-	-
rs139447737	11:7527737211:75277372	T/C	0.003 (C)	SNP	dbSNP	Multiple_observations,1000Genomes,ESP,	-	18 5 prime UTR variant	-	-	-	-
rs78910605	11:7527737611:75277376	C/T	0.028 (T)	SNP	dbSNP	Multiple_observations,Frequency,1000Genomes,ESP,	-	18 5 prime UTR variant	-	-	-	-
rs369900182	11:7527738111:75277381	A/T	-	SNP	dbSNP	-	-	18 5 prime UTR variant	-	-	-	-
rs11539325	11:7527741111:75277411	T/C	-	SNP	dbSNP	-	-	12 Missense variant	L/P	6	31deleterious(0.03)	1unknown(0)
ss1341923068	11:7527741511:75277415	C/T	0.000 (T)	SNP	1KG_phase3	-	-	15 Synonymous variant	L	7	-	-
rs369807954	11:7527744811:75277448	C/T	-	SNP	dbSNP	ESP,	-	15 Synonymous variant	A	18	-	-
rs200397594	11:7527745211:75277452	G/A	-	SNP	dbSNP	-	-	12 Missense variant	E/K	20	771tolerated(0.77)	1unknown(0)
ss1341923069	11:7527745711:75277457	G/A	0.000 (A)	SNP	1KG_phase3	-	-	15 Synonymous variant	V	21	-	-
rs140588417	11:7527748611:75277486	G/C	-	SNP	dbSNP	Multiple_observations,ESP,	-	12 Missense variant	G/A	31	1001tolerated(1)	1unknown(0)
rs150061926	11:7527749111:75277491	G/C	0.000 (C)	SNP	dbSNP	Multiple_observations,ESP,	-	12 Missense variant	A/P	33	181tolerated(0.18)	1unknown(0)
ss1341923071	11:7527749611:75277496	G/A	0.000 (A)	SNP	1KG_phase3	-	-	15 Synonymous variant	E	34	-	-
rs7105528	11:7527751511:75277515	G/C	-	SNP	dbSNP	Multiple_observations,	-	12 Missense variant	A/P	41	231tolerated(0.23)	134benign(0.133)
COSM931997	11:7527752011:75277520	G/A	-	somatic_SNV	COSMIC	-	-	15 Synonymous variant	T	42	-	-
rs145039745	11:7527752611:75277526	C/A	0.000 (A)	SNP	dbSNP	1000Genomes,	-	15 Synonymous variant	A	44	-	-
ss1341923073	11:7527755411:75277554	T/C	0.001 (C)	SNP	1KG_phase3	-	-	15 Synonymous variant	L	54	-	-
ss1341923074	11:7527756111:75277561	A/G	0.000 (G)	SNP	1KG_phase3	-	-	12 Missense variant	Q/R	56	661tolerated(0.66)	11benign(0.01)
ss1341923075	11:7527758211:75277582	C/T	0.001 (T)	SNP	1KG_phase3	-	-	12 Missense variant	A/V	63	281tolerated(0.28)	151benign(0.15)
ss1341923076	11:7527761311:75277613	G/A	0.000 (A)	SNP	1KG_phase3	-	-	15 Synonymous variant	V	73	-	-
rs376824871	11:7527762111:75277621	C/T	-	SNP	dbSNP	ESP,	-	12 Missense variant	S/L	76	1deleterious(0)	999probably damaging(0.998)
rs137853892	11:7527762711:75277627	T/C	-	SNP	dbSNP	-	pathogenic,	12 Missense variant	L/P	78	1deleterious(0)	1001probably damaging(1)
CM101516	11:7527762711:75277627	HGMD_MUTATION	-	SNP	HGMD-PUBLIC	-	-	16 Coding sequence variant		78	-	-
rs584961	11:7527762811:75277628	A/G	0.110 (A)	SNP	dbSNP	Multiple_observations,Frequency,HapMap,1000Genomes,ESP,	-	15 Synonymous variant	L	78	-	-
rs146831880	11:7527763111:75277631	G/A	-	SNP	dbSNP	Frequency,	-	15 Synonymous variant	G	79	-	-
rs367576479	11:7527763411:75277634	C/T	-	SNP	dbSNP	ESP,	-	15 Synonymous variant	L	80	-	-
COSM80507	11:7527763411:75277634	C/G	-	somatic_SNV	COSMIC	-	-	15 Synonymous variant	L	80	-	-
rs374032433	11:7527765811:75277658	C/T	-	SNP	dbSNP	ESP,	-	15 Synonymous variant	T	88	-	-
rs139127426	11:7527766111:75277661	G/A	0.002 (A)	SNP	dbSNP	Frequency,ESP,	-	15 Synonymous variant	T	89	-	-
COSM931998	11:7527766211:75277662	G/A	-	somatic_SNV	COSMIC	-	-	12 Missense variant	A/T	90	1deleterious(0)	888possibly damaging(0.887)
COSM1298619	11:7527766611:75277666	C/T	-	somatic_SNV	COSMIC	-	-	12 Missense variant	S/L	91	11deleterious(0.01)	587possibly damaging(0.586)
rs112365393	11:7527766811:75277668	C/G	-	SNP	dbSNP	-	-	12 Missense variant	Q/E	92	61tolerated(0.06)	885possibly damaging(0.884)
ss1341923079	11:7527768711:75277687	G/A	0.001 (A)	SNP	1KG_phase3	-	-	12 Missense variant	S/N	98	531tolerated(0.53)	34benign(0.033)
COSM931999	11:7527769211:75277692	G/A	-	somatic_SNV	COSMIC	-	-	12 Missense variant	E/K	100	911tolerated(0.91)	6benign(0.005)
rs377583721	11:7527769911:75277699	T/A	-	SNP	dbSNP	ESP,	-	12 Missense variant	L/Q	102	251tolerated(0.25)	992probably damaging(0.991)
rs369290752	11:7527770111:75277701	C/T	-	SNP	dbSNP	ESP,	-	12 Missense variant	R/C	103	21deleterious(0.02)	803possibly damaging(0.802)
COSM323275	11:7527770211:75277702	G/A	-	somatic_SNV	COSMIC	-	-	12 Missense variant	R/H	103	61tolerated(0.06)	495possibly damaging(0.494)
rs376810317	11:7527770711:75277707	G/C	-	SNP	dbSNP	-	-	12 Missense variant	E/Q	105	81tolerated(0.08)	919probably damaging(0.918)
ss1341923080	11:7527771211:75277712	G/C	0.000 (C)	SNP	1KG_phase3	-	-	12 Missense variant	E/D	106	881tolerated(0.88)	3benign(0.002)
rs148959638	11:7527772011:75277720	C/G	-	SNP	dbSNP	Frequency,ESP,	-	12 Missense variant	A/G	109	201tolerated(0.2)	11benign(0.01)
ss1341923081	11:7527772511:75277725	C/A	0.000 (A)	SNP	1KG_phase3	-	-	12 Missense variant	L/M	111	51tolerated(0.05)	957probably damaging(0.956)
rs200265134	11:7527774011:75277740	C/A	0.000 (A)	SNP	dbSNP	Multiple_observations,ESP,	-	12 Missense variant	R/S	116	1001tolerated(1)	3benign(0.002)
COSM1240157	11:7527774111:75277741	G/A	-	somatic_SNV	COSMIC	-	-	12 Missense variant	R/H	116	61tolerated(0.06)	287benign(0.286)
ss1341923083	11:7527774411:75277744	C/T	0.000 (T)	SNP	1KG_phase3	-	-	12 Missense variant	S/L	117	21deleterious(0.02)	180benign(0.179)
rs650241	11:7527775711:75277757	C/G	0.373 (G)	SNP	dbSNP	Multiple_observations,Frequency,HapMap,1000Genomes,ESP,	-	15 Synonymous variant	S	121	-	-
COSM429862	11:7527775711:75277757	C/G	-	somatic_SNV	COSMIC	-	-	15 Synonymous variant	S	121	-	-
COSM932000	11:7527777011:75277770	G/A	-	somatic_SNV	COSMIC	-	-	12 Missense variant	V/M	126	81tolerated(0.08)	937probably damaging(0.936)
rs374115511	11:7527779711:75277797	T/C	-	SNP	dbSNP	-	-	12 Missense variant	Y/H	135	1deleterious(0)	1000probably damaging(0.999)
rs148088085	11:7527781211:75277812	G/C	-	SNP	dbSNP	Frequency,ESP,	-	12 Missense variant	V/L	140	461tolerated(0.46)	436benign(0.435)
rs371660937	11:7527782011:75277820	C/T	-	SNP	dbSNP	ESP,	-	15 Synonymous variant	F	142	-	-
rs61736330	11:7527783611:75277836	C/A	-	SNP	dbSNP	Frequency,	-	12 Missense variant	R/S	148	471tolerated(0.47)	64benign(0.063)
rs112083274	11:7527787511:75277875	A/C	0.000 (C)	SNP	dbSNP	Multiple_observations,ESP,	-	12 Missense variant	I/L	161	241tolerated(0.24)	742possibly damaging(0.741)
rs150586616	11:7527788611:75277886	C/T	0.001 (T)	SNP	dbSNP	Multiple_observations,1000Genomes,ESP,	-	15 Synonymous variant	R	164	-	-
rs200467391	11:7527792511:75277925	C/T	-	SNP	dbSNP	Frequency,	-	15 Synonymous variant	A	177	-	-
COSM932001	11:7527792811:75277928	G/A	-	somatic_SNV	COSMIC	-	-	15 Synonymous variant	A	178	-	-
COSM1638975	11:7527794111:75277941	G/A	-	somatic_SNV	COSMIC	-	-	12 Missense variant	G/S	183	11deleterious(0.01)	1001probably damaging(1)
ss1341923087	11:7527795211:75277952	C/T	0.000 (T)	SNP	1KG_phase3	-	-	15 Synonymous variant	P	186	-	-
rs138784081	11:7527795911:75277959	A/G	0.001 (G)	SNP	dbSNP	Multiple_observations,ESP,	-	12 Missense variant	T/A	189	491tolerated(0.49)	61benign(0.06)
COSM545258	11:7527796511:75277965	G/C	-	somatic_SNV	COSMIC	-	-	12 Missense variant	D/H	191	101tolerated(0.1)	885possibly damaging(0.884)
ss1341923089	11:7527797311:75277973	G/C	0.000 (C)	SNP	1KG_phase3	-	-	12 Missense variant	E/D	193	581tolerated(0.58)	75benign(0.074)
rs141721173	11:7527797411:75277974	C/A	0.000 (A)	SNP	dbSNP	Multiple_observations,ESP,	-	12 Missense variant	R/S	194	671tolerated(0.67)	104benign(0.103)
COSM1235751	11:7527797411:75277974	C/A	-	somatic_SNV	COSMIC	-	-	12 Missense variant	R/S	194	671tolerated(0.67)	104benign(0.103)
rs377081876	11:7527798911:75277989	C/T	-	SNP	dbSNP	ESP,	-	15 Synonymous variant	L	199	-	-
rs651581	11:7527799211:75277992	C/T	0.299 (T)	SNP	dbSNP	Multiple_observations,Frequency,HapMap,1000Genomes,ESP,	-	15 Synonymous variant	L	200	-	-
ss1341923092	11:7527802811:75278028	G/A	0.000 (A)	SNP	1KG_phase3	-	-	21 Intron variant	-	-	-	-
rs35462148	11:7527804011: between 75278040 & 75278041	-/TCC	0.350 (TCC)	insertion	dbSNP	Multiple_observations,	-	21 Intron variant Feature elongation	-	-	-	-
rs375063918	11:7527804111: between 75278041 & 75278042	-/TCC	-	insertion	dbSNP	-	-	21 Intron variant Feature elongation	-	-	-	-
TMP_ESP_11_75278041_75278043	11:7527804111:75278041-75278043	TCC/-/TCCTCC	-	sequence_alteration	ESP	ESP,	-	21 Intron variant Feature truncation	-	-	-	-
TMP_ESP_11_75278041_75278043	11:7527804111:75278041-75278043	TCC/-/TCCTCC	-	sequence_alteration	ESP	ESP,	-	21 Intron variant Feature elongation	-	-	-	-
rs71471333	11:7527805211: between 75278052 & 75278053	-/TCC	-	insertion	dbSNP	-	-	21 Intron variant Feature elongation	-	-	-	-
rs72057379	11:7527805611: between 75278056 & 75278057	-/TCC	-	insertion	dbSNP	-	-	21 Intron variant Feature elongation	-	-	-	-
ss1341923093	11:7527810311:75278103	T/C	0.000 (C)	SNP	1KG_phase3	-	-	21 Intron variant	-	-	-	-
rs147576369	11:7527810611:75278106	C/T	0.002 (T)	SNP	dbSNP	1000Genomes,	-	21 Intron variant	-	-	-	-
ss1341923095	11:7527810911:75278109	C/T	0.001 (T)	SNP	1KG_phase3	-	-	21 Intron variant	-	-	-	-
ss1341923096	11:7527817911:75278179	A/G	0.000 (G)	SNP	1KG_phase3	-	-	21 Intron variant	-	-	-	-
ss1341923097	11:7527818411:75278184	C/G	0.000 (G)	SNP	1KG_phase3	-	-	21 Intron variant	-	-	-	-
rs148644113	11:7527823911:75278239	G/C	0.002 (C)	SNP	dbSNP	1000Genomes,	-	21 Intron variant	-	-	-	-
rs115945601	11:7527824411:75278244	C/T	0.009 (T)	SNP	dbSNP	1000Genomes,	-	21 Intron variant	-	-	-	-
ss1341923100	11:7527826911:75278269	C/T	0.000 (T)	SNP	1KG_phase3	-	-	21 Intron variant	-	-	-	-
rs142147918	11:7527827311:75278273	A/G	0.006 (G)	SNP	dbSNP	Multiple_observations,1000Genomes,	-	21 Intron variant	-	-	-	-
rs116279760	11:7527829211:75278292	A/G	0.014 (G)	SNP	dbSNP	Multiple_observations,1000Genomes,	-	21 Intron variant	-	-	-	-
ss1341923103	11:7527833311:75278333	T/C	0.000 (C)	SNP	1KG_phase3	-	-	21 Intron variant	-	-	-	-
ss1341923104	11:7527845811:75278458	C/T	0.000 (T)	SNP	1KG_phase3	-	-	21 Intron variant	-	-	-	-
ss1341923105	11:7527851311:75278513	C/T	0.002 (T)	SNP	1KG_phase3	-	-	21 Intron variant	-	-	-	-
rs374903769	11:7527852111:75278521	C/T	-	SNP	dbSNP	-	-	21 Intron variant	-	-	-	-
ss1341923106	11:7527861311:75278613	C/T	0.000 (T)	SNP	1KG_phase3	-	-	21 Intron variant	-	-	-	-
ss1341923107	11:7527861411:75278614	G/A	0.000 (A)	SNP	1KG_phase3	-	-	21 Intron variant	-	-	-	-
rs111708818	11:7527861511:75278615	C/A	0.030 (A)	SNP	dbSNP	Multiple_observations,1000Genomes,	-	21 Intron variant	-	-	-	-
rs184492151	11:7527861811:75278618	C/G/T	0.001 (T)	SNP	dbSNP	Multiple_observations,1000Genomes,	-	21 Intron variant	-	-	-	-
rs184492151	11:7527861811:75278618	C/G/T	0.001 (T)	SNP	dbSNP	Multiple_observations,1000Genomes,	-	21 Intron variant	-	-	-	-
ss1341923110	11:7527865811:75278658	T/C	0.000 (C)	SNP	1KG_phase3	-	-	21 Intron variant	-	-	-	-
ss1341923111	11:7527865911:75278659	G/A	0.000 (A)	SNP	1KG_phase3	-	-	21 Intron variant	-	-	-	-
rs140327369	11:7527866211:75278662	C/T	0.000 (T)	SNP	dbSNP	Multiple_observations,1000Genomes,	-	21 Intron variant	-	-	-	-
ss1341923113	11:7527866311:75278663	G/A	0.000 (A)	SNP	1KG_phase3	-	-	21 Intron variant	-	-	-	-
ss1341923114	11:7527866411:75278664	G/C	0.002 (C)	SNP	1KG_phase3	-	-	21 Intron variant	-	-	-	-
rs11236458	11:7527866611:75278666	C/T	0.062 (T)	SNP	dbSNP	Multiple_observations,Frequency,HapMap,1000Genomes,	-	21 Intron variant	-	-	-	-
rs188502226	11:7527866911:75278669	G/C	0.002 (C)	SNP	dbSNP	1000Genomes,	-	21 Intron variant	-	-	-	-
rs116873713	11:7527869511:75278695	G/A	0.000 (A)	SNP	dbSNP	1000Genomes,	-	21 Intron variant	-	-	-	-
ss1341923118	11:7527873311:75278733	C/T	0.000 (T)	SNP	1KG_phase3	-	-	21 Intron variant	-	-	-	-
ss1341923119	11:7527877011:75278770	G/A	0.000 (A)	SNP	1KG_phase3	-	-	21 Intron variant	-	-	-	-
rs145556156	11:7527881111:75278811	G/C	0.002 (C)	SNP	dbSNP	1000Genomes,	-	21 Intron variant	-	-	-	-
ss1341923121	11:7527881711:75278817	A/T	0.000 (T)	SNP	1KG_phase3	-	-	21 Intron variant	-	-	-	-
rs12223805	11:7527885611:75278856	C/A	0.007 (A)	SNP	dbSNP	Multiple_observations,Frequency,HapMap,1000Genomes,	-	21 Intron variant	-	-	-	-
rs181420455	11:7527891911:75278919	G/A	0.000 (A)	SNP	dbSNP	1000Genomes,	-	21 Intron variant	-	-	-	-
ss1341923124	11:7527892911:75278929	G/A	0.000 (A)	SNP	1KG_phase3	-	-	21 Intron variant	-	-	-	-
rs369108577	11:7527895811:75278958	G/A	-	SNP	dbSNP	-	-	21 Intron variant	-	-	-	-
rs186003885	11:7527902711:75279027	G/A	0.000 (A)	SNP	dbSNP	1000Genomes,	-	21 Intron variant	-	-	-	-
ss1341923126	11:7527905111:75279051	C/T	0.000 (T)	SNP	1KG_phase3	-	-	21 Intron variant	-	-	-	-
rs605040	11:7527907911:75279079	T/C	0.350 (C)	SNP	dbSNP	Multiple_observations,Frequency,1000Genomes,	-	21 Intron variant	-	-	-	-
rs140465492	11:7527923211:75279232	G/C	0.020 (C)	SNP	dbSNP	Multiple_observations,1000Genomes,	-	21 Intron variant	-	-	-	-
ss1341923129	11:7527924911:75279249	G/A	0.000 (A)	SNP	1KG_phase3	-	-	21 Intron variant	-	-	-	-
rs645935	11:7527929011:75279290	T/C	0.256 (T)	SNP	dbSNP	Multiple_observations,Frequency,1000Genomes,	-	21 Intron variant	-	-	-	-
rs145638963	11:7527933311:75279333	T/C	0.000 (C)	SNP	dbSNP	1000Genomes,	-	21 Intron variant	-	-	-	-
rs10711399	11:7527935111:75279351	A/-	0.273 (A)	deletion	dbSNP	Multiple_observations,	-	21 Intron variant Feature truncation	-	-	-	-
rs200033418	11:7527935111:75279351	A/T	-	SNP	dbSNP	-	-	21 Intron variant	-	-	-	-
rs62673460	11:7527936011:75279360	A/T	-	SNP	dbSNP	Multiple_observations,	-	21 Intron variant	-	-	-	-
ss1341923132	11:7527940011:75279400	C/T	0.000 (T)	SNP	1KG_phase3	-	-	21 Intron variant	-	-	-	-
rs75530338	11:7527940411:75279404	C/T	0.013 (T)	SNP	dbSNP	Multiple_observations,Frequency,1000Genomes,	-	21 Intron variant	-	-	-	-
rs34530330	11:7527941011:75279410	G/-	-	deletion	dbSNP	-	-	21 Intron variant Feature truncation	-	-	-	-
ss1341923134	11:7527941511:75279415	C/T	0.000 (T)	SNP	1KG_phase3	-	-	21 Intron variant	-	-	-	-
rs646474	11:7527944711:75279447	T/C	0.294 (C)	SNP	dbSNP	Multiple_observations,Frequency,HapMap,1000Genomes,Cited,	-	21 Intron variant	-	-	-	-
rs646851	11:7527947611:75279476	C/T	0.350 (T)	SNP	dbSNP	Multiple_observations,Frequency,HapMap,1000Genomes,	-	21 Intron variant	-	-	-	-
ss1341923137	11:7527951011:75279510	G/A	0.000 (A)	SNP	1KG_phase3	-	-	21 Intron variant	-	-	-	-
ss1341923138	11:7527952211:75279522	C/G	0.000 (G)	SNP	1KG_phase3	-	-	21 Intron variant	-	-	-	-
ss1341923139	11:7527953611:75279536	C/T	0.000 (T)	SNP	1KG_phase3	-	-	21 Intron variant	-	-	-	-
rs646920	11:7527953911:75279539	C/T	0.294 (T)	SNP	dbSNP	Multiple_observations,Frequency,HapMap,1000Genomes,	-	21 Intron variant	-	-	-	-
rs189069347	11:7527954911:75279549	C/T	0.000 (T)	SNP	dbSNP	1000Genomes,	-	21 Intron variant	-	-	-	-
ss1341923142	11:7527955011:75279550	T/G	0.000 (G)	SNP	1KG_phase3	-	-	21 Intron variant	-	-	-	-
rs369083637	11:7527961711:75279617	G/C	-	SNP	dbSNP	-	-	21 Intron variant	-	-	-	-
ss1341923143	11:7527961811:75279618	A/G	0.000 (G)	SNP	1KG_phase3	-	-	21 Intron variant	-	-	-	-
ss1341923144	11:7527962211:75279622	T/G	0.001 (G)	SNP	1KG_phase3	-	-	21 Intron variant	-	-	-	-
rs376768493	11:7527973811:75279738	C/T	-	SNP	dbSNP	ESP,	-	21 Intron variant	-	-	-	-
ss1341923145	11:7527976811:75279768	A/C	0.000 (C)	SNP	1KG_phase3	-	-	13 Splice region variant Intron variant	-	-	-	-
ss1341923146	11:7527978011:75279780	C/G	0.000 (G)	SNP	1KG_phase3	-	-	12 Missense variant	H/Q	209	141tolerated(0.14)	620possibly damaging(0.619)
rs373526486	11:7527979611:75279796	C/T	-	SNP	dbSNP	-	-	12 Missense variant	H/Y	215	31deleterious(0.03)	907possibly damaging(0.906)
COSM131116	11:7527980011:75279800	A/G	-	somatic_SNV	COSMIC	-	-	12 Missense variant	H/R	216	61tolerated(0.06)	12benign(0.011)
rs369251719	11:7527983111:75279831	G/A	-	SNP	dbSNP	ESP,	-	15 Synonymous variant	V	226	-	-
rs649257	11:7527984611:75279846	C/T	0.377 (T)	SNP	dbSNP	Multiple_observations,Frequency,HapMap,1000Genomes,ESP,	-	15 Synonymous variant	T	231	-	-
COSM147291	11:7527984611:75279846	C/T	-	somatic_SNV	COSMIC	-	-	15 Synonymous variant	T	231	-	-
rs138193444	11:7527988311:75279883	T/C	0.003 (C)	SNP	dbSNP	Multiple_observations,1000Genomes,ESP,	-	21 Intron variant	-	-	-	-
rs201156258	11:7527990811:75279908	G/A	0.001 (A)	SNP	dbSNP	-	-	21 Intron variant	-	-	-	-
ss1341923150	11:7527991311:75279913	G/T	0.000 (T)	SNP	1KG_phase3	-	-	21 Intron variant	-	-	-	-
rs610127	11:7527993911:75279939	C/T	-	SNP	dbSNP	-	-	21 Intron variant	-	-	-	-
ss1341923151	11:7527996111:75279961	T/G	0.000 (G)	SNP	1KG_phase3	-	-	21 Intron variant	-	-	-	-
rs116506210	11:7527997111:75279971	G/A	0.003 (A)	SNP	dbSNP	Multiple_observations,1000Genomes,ESP,	-	21 Intron variant	-	-	-	-
rs200202046	11:7527999111:75279991	C/T	0.000 (T)	SNP	dbSNP	-	-	15 Synonymous variant	Y	243	-	-
rs199681690	11:7528000011:75280000	C/T	0.000 (T)	SNP	dbSNP	-	-	15 Synonymous variant	Y	246	-	-
rs149910134	11:7528000311:75280003	C/T	-	SNP	dbSNP	Frequency,ESP,	-	15 Synonymous variant	D	247	-	-
rs61733248	11:7528000611:75280006	C/T	0.002 (T)	SNP	dbSNP	Multiple_observations,Frequency,1000Genomes,ESP,	-	15 Synonymous variant	D	248	-	-
COSM1357002	11:7528000711:75280007	G/A	-	somatic_SNV	COSMIC	-	-	12 Missense variant	E/K	249	861tolerated(0.86)	51benign(0.05)
ss1341923156	11:7528000911:75280009	G/C	0.000 (C)	SNP	1KG_phase3	-	-	12 Missense variant	E/D	249	551tolerated(0.55)	552possibly damaging(0.551)
ss1341923157	11:7528001311:75280013	G/A	0.000 (A)	SNP	1KG_phase3	-	-	12 Missense variant	E/K	251	731tolerated(0.73)	267benign(0.266)
rs369937589	11:7528002711:75280027	C/T	-	SNP	dbSNP	ESP,	-	15 Synonymous variant	I	255	-	-
COSM361599	11:7528003011:75280030	G/T	-	somatic_SNV	COSMIC	-	-	15 Synonymous variant	V	256	-	-
COSM1638976	11:7528004011:75280040	C/A	-	somatic_SNV	COSMIC	-	-	12 Missense variant	L/M	260	31deleterious(0.03)	1001probably damaging(1)
rs201644679	11:7528004411:75280044	C/G	0.000 (G)	SNP	dbSNP	-	-	12 Missense variant	A/G	261	441tolerated(0.44)	8benign(0.007)
TMP_ESP_11_75280049_75280049	11:7528004911:75280049	A/-	-	deletion	ESP	ESP,	-	5 Frameshift variant Feature truncation		263	-	-
COSM1225309	11:7528005911:75280059	G/A	-	somatic_SNV	COSMIC	-	-	12 Missense variant	S/N	266	1deleterious(0)	913probably damaging(0.912)
COSM338458	11:7528006311:75280063	C/T	-	somatic_SNV	COSMIC	-	-	15 Synonymous variant	L	267	-	-
rs267603192	11:7528008011:75280080	A/T	-	SNP	dbSNP	-	not provided,	12 Missense variant	H/L	273	631tolerated(0.63)	34benign(0.033)
COSM267405	11:7528008411:75280084	C/T	-	somatic_SNV	COSMIC	-	-	15 Synonymous variant	H	274	-	-
rs199679249	11:7528008511:75280085	G/A	-	SNP	dbSNP	Frequency,	-	12 Missense variant	V/M	275	321tolerated(0.32)	123benign(0.122)
rs148613550	11:7528008911:75280089	A/C	-	SNP	dbSNP	Frequency,	-	12 Missense variant	E/A	276	11deleterious(0.01)	687possibly damaging(0.686)
rs373407071	11:7528009311:75280093	T/C	-	SNP	dbSNP	ESP,	-	15 Synonymous variant	P	277	-	-
rs376437954	11:7528009611:75280096	C/G	-	SNP	dbSNP	ESP,	-	15 Synonymous variant	L	278	-	-
COSM277225	11:7528009711:75280097	G/A	-	somatic_SNV	COSMIC	-	-	12 Missense variant	E/K	279	191tolerated(0.19)	371benign(0.37)
rs200572997	11:7528010011:75280100	C/T	0.000 (T)	SNP	dbSNP	-	-	12 Missense variant	R/C	280	1deleterious(0)	978probably damaging(0.977)
rs370057420	11:7528010111:75280101	G/A	0.000 (A)	SNP	dbSNP	ESP,	-	12 Missense variant	R/H	280	31deleterious(0.03)	978probably damaging(0.977)
rs149585133	11:7528010211:75280102	C/T	0.000 (T)	SNP	dbSNP	Multiple_observations,1000Genomes,ESP,	-	15 Synonymous variant	R	280	-	-
ss1341923162	11:7528010511:75280105	T/C	0.000 (C)	SNP	1KG_phase3	-	-	15 Synonymous variant	L	281	-	-
rs369751579	11:7528012411:75280124	G/A	-	SNP	dbSNP	-	-	12 Missense variant	E/K	288	371tolerated(0.37)	13benign(0.012)
ss1341923163	11:7528012611:75280126	G/A	0.000 (A)	SNP	1KG_phase3	-	-	15 Synonymous variant	E	288	-	-
rs200106884	11:7528015311:75280153	G/T	0.000 (T)	SNP	dbSNP	-	-	12 Missense variant	M/I	297	31deleterious(0.03)	182benign(0.181)
COSM1357003	11:7528016511:75280165	T/C	-	somatic_SNV	COSMIC	-	-	15 Synonymous variant	A	301	-	-
ss1341923165	11:7528017511:75280175	T/C	0.000 (C)	SNP	1KG_phase3	-	-	12 Missense variant	S/P	305	91tolerated(0.09)	1000probably damaging(0.999)
rs147740415	11:7528017711:75280177	C/T	0.001 (T)	SNP	dbSNP	Frequency,ESP,	-	15 Synonymous variant	S	305	-	-
rs142663000	11:7528018511:75280185	A/G	-	SNP	dbSNP	Frequency,ESP,	-	12 Missense variant	K/R	308	521tolerated(0.52)	1000probably damaging(0.999)
COSM932002	11:7528020411:75280204	C/T	-	somatic_SNV	COSMIC	-	-	15 Synonymous variant	T	314	-	-
rs367704364	11:7528024511:75280245	C/T	-	SNP	dbSNP	ESP,	-	21 Intron variant	-	-	-	-
ss1341923167	11:7528026111:75280261	G/C	0.000 (C)	SNP	1KG_phase3	-	-	21 Intron variant	-	-	-	-
rs143305212	11:7528027211:75280272	T/G	0.019 (G)	SNP	dbSNP	Multiple_observations,1000Genomes,	-	21 Intron variant	-	-	-	-
ss1341923169	11:7528031811:75280318	G/A	0.000 (A)	SNP	1KG_phase3	-	-	21 Intron variant	-	-	-	-
ss1341923170	11:7528032011:75280320	A/T	0.000 (T)	SNP	1KG_phase3	-	-	21 Intron variant	-	-	-	-
ss1341923171	11:7528035311:75280353	A/G	0.001 (G)	SNP	1KG_phase3	-	-	21 Intron variant	-	-	-	-
ss1341923172	11:7528042211:75280422	G/A	0.000 (A)	SNP	1KG_phase3	-	-	21 Intron variant	-	-	-	-
ss1341923173	11:7528045011:75280450	T/G	0.000 (G)	SNP	1KG_phase3	-	-	21 Intron variant	-	-	-	-
ss1371152022	11:7528046511:75280465-75280467	TAT/-	0.001 (-)	deletion	1KG_phase3	-	-	21 Intron variant Feature truncation	-	-	-	-
ss1341923174	11:7528047511:75280475	A/T	0.001 (T)	SNP	1KG_phase3	-	-	21 Intron variant	-	-	-	-
rs606984	11:7528047811:75280478	T/A	0.291 (A)	SNP	dbSNP	Multiple_observations,Frequency,1000Genomes,	-	21 Intron variant	-	-	-	-
rs372167947	11:7528047911:75280479-75280480	TT/AC	-	substitution	dbSNP	-	-	21 Intron variant	-	-	-	-
rs186303252	11:7528048111:75280481	T/A	0.000 (A)	SNP	dbSNP	1000Genomes,	-	21 Intron variant	-	-	-	-
rs113554578	11:7528050411:75280504	G/A	-	SNP	dbSNP	-	-	21 Intron variant	-	-	-	-
ss1341923177	11:7528052211:75280522	C/T	0.000 (T)	SNP	1KG_phase3	-	-	21 Intron variant	-	-	-	-
rs148350892	11:7528052511:75280525	T/C	0.002 (C)	SNP	dbSNP	1000Genomes,	-	21 Intron variant	-	-	-	-
ss1341923179	11:7528056111:75280561	G/C	0.000 (C)	SNP	1KG_phase3	-	-	21 Intron variant	-	-	-	-
ss1341923180	11:7528057011:75280570	C/T	0.000 (T)	SNP	1KG_phase3	-	-	21 Intron variant	-	-	-	-
rs370718162	11:7528059211:75280592	C/T	-	SNP	dbSNP	-	-	21 Intron variant	-	-	-	-
ss1341923181	11:7528059311:75280593	G/A	0.002 (A)	SNP	1KG_phase3	-	-	21 Intron variant	-	-	-	-
rs191050697	11:7528061111:75280611	G/A	0.000 (A)	SNP	dbSNP	1000Genomes,	-	21 Intron variant	-	-	-	-
ss1341923183	11:7528065711:75280657	G/A	0.000 (A)	SNP	1KG_phase3	-	-	21 Intron variant	-	-	-	-
ss1341923184	11:7528067711:75280677	A/G	0.000 (G)	SNP	1KG_phase3	-	-	21 Intron variant	-	-	-	-
rs607933	11:7528069911:75280699	A/G	0.298 (G)	SNP	dbSNP	Multiple_observations,1000Genomes,	-	21 Intron variant	-	-	-	-
ss1341923186	11:7528076611:75280766	C/G	0.000 (G)	SNP	1KG_phase3	-	-	21 Intron variant	-	-	-	-
rs35842807	11:7528077011: between 75280770 & 75280771	-/A	-	insertion	dbSNP	-	-	21 Intron variant Feature elongation	-	-	-	-
rs147526004	11:7528077411:75280774	C/T	0.002 (T)	SNP	dbSNP	1000Genomes,	-	21 Intron variant	-	-	-	-
rs183033051	11:7528077611:75280776	T/C	0.000 (C)	SNP	dbSNP	1000Genomes,	-	21 Intron variant	-	-	-	-
rs186257704	11:7528078111:75280781	A/C	0.000 (C)	SNP	dbSNP	1000Genomes,	-	21 Intron variant	-	-	-	-
ss1341923190	11:7528078911:75280789	T/C	0.001 (C)	SNP	1KG_phase3	-	-	21 Intron variant	-	-	-	-
ss1341923191	11:7528080111:75280801	C/T	0.000 (T)	SNP	1KG_phase3	-	-	21 Intron variant	-	-	-	-
rs191330517	11:7528081211:75280812	G/T	0.000 (T)	SNP	dbSNP	1000Genomes,	-	21 Intron variant	-	-	-	-
rs182853619	11:7528081311:75280813	G/T	0.000 (T)	SNP	dbSNP	1000Genomes,	-	21 Intron variant	-	-	-	-
rs188323812	11:7528082611:75280826	T/G	0.000 (G)	SNP	dbSNP	Multiple_observations,1000Genomes,	-	21 Intron variant	-	-	-	-
ss1341923195	11:7528094711:75280947	A/G	0.000 (G)	SNP	1KG_phase3	-	-	21 Intron variant	-	-	-	-
ss1341923196	11:7528095911:75280959	C/G	0.000 (G)	SNP	1KG_phase3	-	-	21 Intron variant	-	-	-	-
rs75391940	11:7528100411:75281004	A/G	0.001 (G)	SNP	dbSNP	Frequency,1000Genomes,	-	21 Intron variant	-	-	-	-
ss1341923198	11:7528100911:75281009	C/T	0.000 (T)	SNP	1KG_phase3	-	-	21 Intron variant	-	-	-	-
rs192161095	11:7528102211:75281022	A/G	-	SNP	dbSNP	1000Genomes,	-	21 Intron variant	-	-	-	-
rs140194088	11:7528104411:75281044	A/G	0.000 (G)	SNP	dbSNP	1000Genomes,	-	21 Intron variant	-	-	-	-
rs74381725	11:7528115011:75281150	G/A	0.007 (A)	SNP	dbSNP	Multiple_observations,Frequency,1000Genomes,	-	21 Intron variant	-	-	-	-
ss1341923201	11:7528118011:75281180	A/G	0.000 (G)	SNP	1KG_phase3	-	-	21 Intron variant	-	-	-	-
rs182206660	11:7528120611:75281206	G/A	-	SNP	dbSNP	1000Genomes,	-	21 Intron variant	-	-	-	-
rs614604	11:7528120911:75281209	A/G	0.248 (G)	SNP	dbSNP	Multiple_observations,Frequency,HapMap,1000Genomes,	-	21 Intron variant	-	-	-	-
rs116367641	11:7528124411:75281244	G/A	0.011 (A)	SNP	dbSNP	Multiple_observations,1000Genomes,	-	21 Intron variant	-	-	-	-
rs370367671	11:7528132511:75281325	A/G	0.002 (G)	SNP	dbSNP	-	-	21 Intron variant	-	-	-	-
rs187740559	11:7528137311:75281373	G/A	0.001 (A)	SNP	dbSNP	1000Genomes,	-	21 Intron variant	-	-	-	-
ss1341923206	11:7528138011:75281380	G/A	0.000 (A)	SNP	1KG_phase3	-	-	21 Intron variant	-	-	-	-
ss1341923207	11:7528138611:75281386	G/T	0.000 (T)	SNP	1KG_phase3	-	-	21 Intron variant	-	-	-	-
rs143390575	11:7528139011:75281390	G/A	0.002 (A)	SNP	dbSNP	1000Genomes,	-	21 Intron variant	-	-	-	-
rs147144556	11:7528139511:75281395	G/A	0.000 (A)	SNP	dbSNP	1000Genomes,	-	21 Intron variant	-	-	-	-
rs139480346	11:7528140111:75281401	C/G	0.001 (G)	SNP	dbSNP	1000Genomes,	-	21 Intron variant	-	-	-	-
ss1341923211	11:7528140811:75281408	G/A	0.000 (A)	SNP	1KG_phase3	-	-	21 Intron variant	-	-	-	-
rs192655507	11:7528143211:75281432	C/G	0.003 (G)	SNP	dbSNP	Multiple_observations,1000Genomes,	-	21 Intron variant	-	-	-	-
ss1341923213	11:7528144011:75281440	G/A	0.000 (A)	SNP	1KG_phase3	-	-	21 Intron variant	-	-	-	-
rs74913812	11:7528147211:75281472	C/G	0.028 (G)	SNP	dbSNP	Multiple_observations,Frequency,1000Genomes,	-	21 Intron variant	-	-	-	-
rs79811905	11:7528150611:75281506	T/A	0.028 (A)	SNP	dbSNP	Multiple_observations,1000Genomes,	-	21 Intron variant	-	-	-	-
rs112932104	11:7528152311:75281523	T/C	0.000 (C)	SNP	dbSNP	-	-	21 Intron variant	-	-	-	-
rs368852369	11:7528155711:75281557	T/C	0.003 (C)	SNP	dbSNP	-	-	21 Intron variant	-	-	-	-
ss1341923218	11:7528156111:75281561	G/T	0.001 (T)	SNP	1KG_phase3	-	-	21 Intron variant	-	-	-	-
rs149686542	11:7528158611:75281586	C/T	0.001 (T)	SNP	dbSNP	1000Genomes,	-	21 Intron variant	-	-	-	-
ss1341923220	11:7528159311:75281593	C/T	0.000 (T)	SNP	1KG_phase3	-	-	21 Intron variant	-	-	-	-
rs184285352	11:7528159411:75281594	G/A	-	SNP	dbSNP	1000Genomes,	-	21 Intron variant	-	-	-	-
rs1790304	11:7528160911:75281609	C/G	0.307 (C)	SNP	dbSNP	Multiple_observations,Frequency,HapMap,1000Genomes,	-	21 Intron variant	-	-	-	-
ss1341923222	11:7528172711:75281727	C/T	0.001 (T)	SNP	1KG_phase3	-	-	21 Intron variant	-	-	-	-
rs372412171	11:7528172811:75281728	T/A	-	SNP	dbSNP	-	-	21 Intron variant	-	-	-	-
rs189056124	11:7528181911:75281819	C/T	0.001 (T)	SNP	dbSNP	1000Genomes,	-	21 Intron variant	-	-	-	-
ss1341923224	11:7528187411:75281874	C/T	0.000 (T)	SNP	1KG_phase3	-	-	21 Intron variant	-	-	-	-
rs376705810	11:7528188511:75281885	A/G	-	SNP	dbSNP	-	-	21 Intron variant	-	-	-	-
rs374332708	11:7528192611:75281926	G/C	0.000 (C)	SNP	dbSNP	-	-	21 Intron variant	-	-	-	-
ss1341923226	11:7528196511:75281965	A/G	0.000 (G)	SNP	1KG_phase3	-	-	21 Intron variant	-	-	-	-
ss1341923227	11:7528197411:75281974	C/T	0.000 (T)	SNP	1KG_phase3	-	-	21 Intron variant	-	-	-	-
ss1341923228	11:7528197711:75281977	G/A	0.000 (A)	SNP	1KG_phase3	-	-	21 Intron variant	-	-	-	-
rs145537247	11:7528202111:75282021	G/A	-	SNP	dbSNP	1000Genomes,	-	21 Intron variant	-	-	-	-
rs634552	11:7528205211:75282052	T/G	0.296 (T)	SNP	dbSNP	Multiple_observations,Frequency,HapMap,1000Genomes,Cited,	-	21 Intron variant	-	-	-	-
rs373494315	11:7528212311: between 75282123 & 75282124	-/GT	-	insertion	dbSNP	-	-	21 Intron variant Feature elongation	-	-	-	-
1371152028,1371152032,1371152025	11:7528212311:75282123-75282126	TGTG/TGTGTG/TGTGTGTG/-	0.001 (-)	sequence_alteration	1KG_phase3	-	-	21 Intron variant Feature truncation	-	-	-	-
1371152028,1371152032,1371152025	11:7528212311:75282123-75282126	TGTG/TGTGTG/TGTGTGTG/-	0.001 (-)	sequence_alteration	1KG_phase3	-	-	21 Intron variant Feature elongation	-	-	-	-
1371152028,1371152032,1371152025	11:7528212311:75282123-75282126	TGTG/TGTGTG/TGTGTGTG/-	0.001 (-)	sequence_alteration	1KG_phase3	-	-	21 Intron variant Feature elongation	-	-	-	-
ss1341923230	11:7528222711:75282227	C/T	0.000 (T)	SNP	1KG_phase3	-	-	21 Intron variant	-	-	-	-
rs193178770	11:7528225211:75282252	C/T	0.001 (T)	SNP	dbSNP	1000Genomes,	-	21 Intron variant	-	-	-	-
rs148452811	11:7528226411:75282264	T/G	0.000 (G)	SNP	dbSNP	1000Genomes,	-	21 Intron variant	-	-	-	-
ss1341923233	11:7528230111:75282301	A/G	0.000 (G)	SNP	1KG_phase3	-	-	21 Intron variant	-	-	-	-
rs34605148	11:7528230711:75282307	C/A	-	SNP	dbSNP	-	-	21 Intron variant	-	-	-	-
ss1341923234	11:7528233111:75282331	T/C	0.000 (C)	SNP	1KG_phase3	-	-	21 Intron variant	-	-	-	-
ss1341923235	11:7528235811:75282358	A/T	0.000 (T)	SNP	1KG_phase3	-	-	21 Intron variant	-	-	-	-
ss1341923236	11:7528238511:75282385	T/C	0.000 (C)	SNP	1KG_phase3	-	-	21 Intron variant	-	-	-	-
ss1341923237	11:7528240311:75282403	G/C	0.000 (C)	SNP	1KG_phase3	-	-	21 Intron variant	-	-	-	-
rs371717481	11:7528251311:75282513	A/T	0.001 (T)	SNP	dbSNP	-	-	21 Intron variant	-	-	-	-
rs144101015	11:7528251611:75282516	C/T	0.002 (T)	SNP	dbSNP	1000Genomes,	-	21 Intron variant	-	-	-	-
rs77612994	11:7528253711:75282537	G/A	0.046 (A)	SNP	dbSNP	Multiple_observations,Frequency,1000Genomes,	-	21 Intron variant	-	-	-	-
ss1341923241	11:7528257411:75282574	C/T	0.002 (T)	SNP	1KG_phase3	-	-	21 Intron variant	-	-	-	-
ss1341923242	11:7528260111:75282601	G/C	0.000 (C)	SNP	1KG_phase3	-	-	21 Intron variant	-	-	-	-
ss1341923243	11:7528269111:75282691	C/T	0.000 (T)	SNP	1KG_phase3	-	-	21 Intron variant	-	-	-	-
ss1341923244	11:7528270211:75282702	A/C	0.000 (C)	SNP	1KG_phase3	-	-	21 Intron variant	-	-	-	-
ss1341923245	11:7528270411:75282704	G/A	0.000 (A)	SNP	1KG_phase3	-	-	21 Intron variant	-	-	-	-
ss1341923246	11:7528270911:75282709	C/T	0.000 (T)	SNP	1KG_phase3	-	-	21 Intron variant	-	-	-	-
ss1341923247	11:7528274011:75282740	G/A	0.000 (A)	SNP	1KG_phase3	-	-	21 Intron variant	-	-	-	-
ss1341923248	11:7528274111:75282741	G/A	0.000 (A)	SNP	1KG_phase3	-	-	21 Intron variant	-	-	-	-
rs117514071	11:7528275211:75282752	A/G	0.017 (G)	SNP	dbSNP	Multiple_observations,1000Genomes,	-	21 Intron variant	-	-	-	-
ss1341923250	11:7528277511:75282775	G/A	0.000 (A)	SNP	1KG_phase3	-	-	21 Intron variant	-	-	-	-
rs371267874	11:7528277911:75282779	A/G	-	SNP	dbSNP	ESP,	-	21 Intron variant	-	-	-	-
rs201950326	11:7528279011:75282790	C/G	0.000 (G)	SNP	dbSNP	-	-	21 Intron variant	-	-	-	-
rs372559471	11:7528279311:75282793	G/A	-	SNP	dbSNP	ESP,	-	21 Intron variant	-	-	-	-
rs201369908	11:7528280711:75282807	C/T	0.000 (T)	SNP	dbSNP	Multiple_observations,ESP,	-	21 Intron variant	-	-	-	-
rs370438059	11:7528281911:75282819	C/T	0.000 (T)	SNP	dbSNP	ESP,	-	13 Splice region variant Intron variant	-	-	-	-
rs7105575	11:7528282011:75282820	C/A	0.028 (A)	SNP	dbSNP	Multiple_observations,Frequency,HapMap,1000Genomes,ESP,	-	13 Splice region variant Intron variant	-	-	-	-
TMP_ESP_11_75282831_75282831	11:7528283111:75282831	C/-	-	deletion	ESP	ESP,	-	5 Frameshift variant Feature truncation		320	-	-
COSM932003	11:7528283311:75282833	T/C	-	somatic_SNV	COSMIC	-	-	12 Missense variant	L/P	321	1deleterious(0)	1001probably damaging(1)
COSM326447	11:7528283811:75282838	G/T	-	somatic_SNV	COSMIC	-	-	12 Missense variant	G/W	323	11deleterious(0.01)	938probably damaging(0.937)
rs144791057	11:7528283911:75282839	G/A	-	SNP	dbSNP	Multiple_observations,ESP,	-	12 Missense variant	G/E	323	1001tolerated(1)	9benign(0.008)
rs147936395	11:7528286711:75282867	G/C	-	SNP	dbSNP	Frequency,ESP,	-	12 Missense variant	K/N	332	131tolerated(0.13)	1000probably damaging(0.999)
rs585821	11:7528288211:75282882	G/A	0.377 (A)	SNP	dbSNP	Multiple_observations,Frequency,HapMap,1000Genomes,ESP,	-	15 Synonymous variant	L	337	-	-
ss1341923256	11:7528288711:75282887	G/T	0.000 (T)	SNP	1KG_phase3	-	-	12 Missense variant	R/L	339	51deleterious(0.05)	217benign(0.216)
COSM196204	11:7528288711:75282887	G/A	-	somatic_SNV	COSMIC	-	-	12 Missense variant	R/H	339	61tolerated(0.06)	598possibly damaging(0.597)
rs201416803	11:7528289111:75282891	G/A	-	SNP	dbSNP	Frequency,	-	12 Missense variant	M/I	340	1001tolerated(1)	2benign(0.001)
rs150431930	11:7528292011:75282920	G/C	-	SNP	dbSNP	Frequency,ESP,	-	12 Missense variant	S/T	350	301tolerated(0.3)	440benign(0.439)
rs368336245	11:7528292211:75282922	G/A	-	SNP	dbSNP	ESP,	-	12 Missense variant	V/M	351	61tolerated(0.06)	475possibly damaging(0.474)
COSM1357004	11:7528292811:75282928	C/A	-	somatic_SNV	COSMIC	-	-	12 Missense variant	H/N	353	1deleterious(0)	998probably damaging(0.997)
rs199548932	11:7528293011:75282930	C/T	-	SNP	dbSNP	Multiple_observations,Frequency,ESP,	-	15 Synonymous variant	H	353	-	-
rs369550626	11:7528293111:75282931	G/A	-	SNP	dbSNP	ESP,	-	12 Missense variant	A/T	354	201tolerated(0.2)	1000probably damaging(0.999)
ss1341923257	11:7528293611:75282936	C/T	0.000 (T)	SNP	1KG_phase3	-	-	15 Synonymous variant	T	355	-	-
COSM1298620	11:7528294311:75282943	G/C	-	somatic_SNV	COSMIC	-	-	12 Missense variant	E/Q	358	1deleterious(0)	1000probably damaging(0.999)
ss1341923258	11:7528296511:75282965	C/T	0.000 (T)	SNP	1KG_phase3	-	-	12 Missense variant	P/L	365	61tolerated(0.06)	698possibly damaging(0.697)
ss1341923259	11:7528298411:75282984	C/T	0.000 (T)	SNP	1KG_phase3	-	-	15 Synonymous variant	Y	371	-	-
rs200180052	11:7528298511:75282985	G/A	0.000 (A)	SNP	dbSNP	-	-	12 Missense variant	G/R	372	111tolerated(0.11)	963probably damaging(0.962)
COSM690662	11:7528298911:75282989	G/C	-	somatic_SNV	COSMIC	-	-	12 Missense variant	R/P	373	321tolerated(0.32)	646possibly damaging(0.645)
rs375913094	11:7528299011:75282990	C/T	-	SNP	dbSNP	ESP,	-	15 Synonymous variant	R	373	-	-
COSM932004	11:7528299011:75282990	C/T	-	somatic_SNV	COSMIC	-	-	15 Synonymous variant	R	373	-	-
ss1341923261	11:7528299411:75282994	G/T	0.000 (T)	SNP	1KG_phase3	-	-	4 Stop gained	E/*	375	-	-
ss1341923262	11:7528299511:75282995	A/T	0.000 (T)	SNP	1KG_phase3	-	-	12 Missense variant	E/V	375	301tolerated(0.3)	847possibly damaging(0.846)
ss1341923263	11:7528299611:75282996	G/A	0.000 (A)	SNP	1KG_phase3	-	-	15 Synonymous variant	E	375	-	-
ss1341923264	11:7528300011:75283000	C/T	0.000 (T)	SNP	1KG_phase3	-	-	12 Missense variant	R/C	377	21deleterious(0.02)	917probably damaging(0.916)
rs267603193	11:7528300711:75283007	C/T	-	SNP	dbSNP	-	not provided,	12 Missense variant	P/L	379	1deleterious(0)	1001probably damaging(1)
COSM932005	11:7528301711:75283017	C/A	-	somatic_SNV	COSMIC	-	-	12 Missense variant	F/L	382	1deleterious(0)	996probably damaging(0.995)
rs201843800	11:7528302011:75283020	C/T	0.000 (T)	SNP	dbSNP	-	-	15 Synonymous variant	Y	383	-	-
rs200974428	11:7528302111:75283021	G/A	-	SNP	dbSNP	Frequency,	-	12 Missense variant	A/T	384	11deleterious(0.01)	700possibly damaging(0.699)
rs368586977	11:7528302311:75283023	C/T	-	SNP	dbSNP	ESP,	-	15 Synonymous variant	A	384	-	-
rs201378927	11:7528304711:75283047	G/A	0.000 (A)	SNP	dbSNP	-	-	15 Synonymous variant	V	392	-	-
ss1341923267	11:7528304811:75283048	C/T	0.000 (T)	SNP	1KG_phase3	-	-	12 Missense variant	R/W	393	61tolerated(0.06)	5benign(0.004)
rs371506866	11:7528306211:75283062	C/T	-	SNP	dbSNP	ESP,	-	15 Synonymous variant	S	397	-	-
rs376520307	11:7528306711:75283067	C/T	-	SNP	dbSNP	ESP,	-	12 Missense variant	S/F	399	1deleterious(0)	1000probably damaging(0.999)
ss1341923268	11:7528307211:75283072	C/G	0.000 (G)	SNP	1KG_phase3	-	-	12 Missense variant	L/V	401	1deleterious(0)	850possibly damaging(0.849)
rs201566218	11:7528307911:75283079	T/C	-	SNP	dbSNP	Multiple_observations,Frequency,ESP,	-	12 Missense variant	I/T	403	151tolerated(0.15)	63benign(0.062)
COSM72604	11:7528308711:75283087	C/G	-	somatic_SNV	COSMIC	-	-	12 Missense variant	L/V	406	171tolerated(0.17)	88benign(0.087)
rs138241050	11:7528309011:75283090	G/C	-	SNP	dbSNP	Multiple_observations,ESP,	-	12 Missense variant	V/L	407	231tolerated(0.23)	687possibly damaging(0.686)
rs371699925	11:7528309411:75283094	G/A	-	SNP	dbSNP	ESP,	-	12 Missense variant	R/Q	408	191tolerated(0.19)	153benign(0.152)
rs200334001	11:7528310711:75283107	C/G	0.000 (G)	SNP	dbSNP	-	-	12 Missense variant	D/E	412	841tolerated(0.84)	16benign(0.015)
rs149137596	11:7528311411:75283114	C/A	-	SNP	dbSNP	Frequency,ESP,	-	15 Synonymous variant	R	415	-	-
rs145015985	11:7528311911:75283119	C/T	-	SNP	dbSNP	Frequency,ESP,	-	15 Synonymous variant	D	416	-	-
rs377537840	11:7528313111:75283131	C/T	0.000 (T)	SNP	dbSNP	ESP,	-	19 3 prime UTR variant	-	-	-	-
ss1341923271	11:7528313211:75283132	C/G	0.001 (G)	SNP	1KG_phase3	-	-	19 3 prime UTR variant	-	-	-	-
TMP_ESP_11_75283147_75283146	11:7528314611: between 75283146 & 75283147	-/GGAT	-	insertion	ESP	ESP,	-	19 3 prime UTR variant Feature elongation	-	-	-	-
ss1341923272	11:7528316311:75283163	C/T	0.000 (T)	SNP	1KG_phase3	-	-	19 3 prime UTR variant	-	-	-	-
rs116470636	11:7528320211:75283202	G/T/A/C	0.001 (A)	SNP	dbSNP	Multiple_observations,1000Genomes,	-	19 3 prime UTR variant	-	-	-	-
rs116470636	11:7528320211:75283202	G/T/A/C	0.001 (A)	SNP	dbSNP	Multiple_observations,1000Genomes,	-	19 3 prime UTR variant	-	-	-	-
rs116470636	11:7528320211:75283202	G/T/A/C	0.001 (A)	SNP	dbSNP	Multiple_observations,1000Genomes,	-	19 3 prime UTR variant	-	-	-	-
rs184623179	11:7528324511:75283245	G/A	0.002 (A)	SNP	dbSNP	1000Genomes,	-	19 3 prime UTR variant	-	-	-	-
rs9175	11:7528325311:75283253	A/G	0.248 (G)	SNP	dbSNP	Multiple_observations,Frequency,1000Genomes,	-	19 3 prime UTR variant	-	-	-	-
rs146501145	11:7528328111:75283281	G/A	0.001 (A)	SNP	dbSNP	1000Genomes,	-	19 3 prime UTR variant	-	-	-	-
ss1341923278	11:7528332011:75283320	C/T	0.000 (T)	SNP	1KG_phase3	-	-	19 3 prime UTR variant	-	-	-	-
rs111736118	11:7528334411:75283344	C/T	0.002 (T)	SNP	dbSNP	Multiple_observations,1000Genomes,	-	19 3 prime UTR variant	-	-	-	-
rs376814949	11:7528334511:75283345	G/A	0.000 (A)	SNP	dbSNP	-	-	19 3 prime UTR variant	-	-	-	-
rs189882479	11:7528335611:75283356	A/G	0.004 (G)	SNP	dbSNP	1000Genomes,	-	19 3 prime UTR variant	-	-	-	-
rs34952121	11:7528343311: between 75283433 & 75283434	-/T	-	insertion	dbSNP	-	-	19 3 prime UTR variant Feature elongation	-	-	-	-
ss1341923282	11:7528348211:75283482	G/A	0.000 (A)	SNP	1KG_phase3	-	-	19 3 prime UTR variant	-	-	-	-
ss1341923283	11:7528354311:75283543	C/T	0.000 (T)	SNP	1KG_phase3	-	-	19 3 prime UTR variant	-	-	-	-
ss1341923284	11:7528360811:75283608	G/A	0.000 (A)	SNP	1KG_phase3	-	-	19 3 prime UTR variant	-	-	-	-
rs12978	11:7528361811:75283618	G/A	0.033 (A)	SNP	dbSNP	Multiple_observations,Frequency,1000Genomes,	-	19 3 prime UTR variant	-	-	-	-
rs141134744	11:7528362311:75283623	G/T	0.003 (T)	SNP	dbSNP	Multiple_observations,1000Genomes,	-	19 3 prime UTR variant	-	-	-	-
ss1341923287	11:7528364211:75283642	G/A	0.000 (A)	SNP	1KG_phase3	-	-	19 3 prime UTR variant	-	-	-	-
rs1044610	11:7528364811:75283648	C/T	-	SNP	dbSNP	Multiple_observations,	-	19 3 prime UTR variant	-	-	-	-
rs6704	11:7528365311:75283653	C/A	0.337 (A)	SNP	dbSNP	Multiple_observations,Frequency,HapMap,1000Genomes,	-	19 3 prime UTR variant	-	-	-	-
rs374355309	11:7528365911:75283659	C/G	0.001 (G)	SNP	dbSNP	-	-	19 3 prime UTR variant	-	-	-	-
rs1044695	11:7528366711:75283667	G/A	-	SNP	dbSNP	Multiple_observations,	-	19 3 prime UTR variant	-	-	-	-
ss1341923290	11:7528367911:75283679	C/T	0.000 (T)	SNP	1KG_phase3	-	-	19 3 prime UTR variant	-	-	-	-
rs180685772	11:7528368411:75283684	G/A	0.000 (A)	SNP	dbSNP	1000Genomes,	-	19 3 prime UTR variant	-	-	-	-
rs1803253	11:7528370411:75283704	G/T	-	SNP	dbSNP	Multiple_observations,	-	19 3 prime UTR variant	-	-	-	-
rs145619367	11:7528370811:75283708	T/G	0.007 (G)	SNP	dbSNP	1000Genomes,	-	19 3 prime UTR variant	-	-	-	-
ss1341923293	11:7528375011:75283750	G/C	0.000 (C)	SNP	1KG_phase3	-	-	19 3 prime UTR variant	-	-	-	-
rs78709417	11:7528376011:75283760	G/C	-	SNP	dbSNP	Multiple_observations,	-	19 3 prime UTR variant	-	-	-	-
rs185499724	11:7528379611:75283796	A/T	-	SNP	dbSNP	Multiple_observations,1000Genomes,	-	19 3 prime UTR variant	-	-	-	-
rs3214601	11:7528379611:75283796-75283797	AT/TT/A	0.006 (TT)	substitution	1KG_phase3	-	-	19 3 prime UTR variant Feature truncation	-	-	-	-
rs3214601	11:7528379611:75283796-75283797	AT/TT/A	0.006 (TT)	substitution	1KG_phase3	-	-	19 3 prime UTR variant	-	-	-	-
rs3214601	11:7528379711:75283797	T/-	0.006 (TT)	deletion	dbSNP	Multiple_observations,	-	19 3 prime UTR variant Feature truncation	-	-	-	-
rs59921650	11:7528384711:75283847	G/A	-	SNP	dbSNP	-	-	25 Downstream gene variant	-	-	-	-
rs189433184	11:7528389411:75283894	G/T	0.000 (T)	SNP	dbSNP	1000Genomes,	-	25 Downstream gene variant	-	-	-	-
rs639939	11:7528391511:75283915	G/A	0.364 (G)	SNP	dbSNP	Multiple_observations,Frequency,HapMap,1000Genomes,	-	25 Downstream gene variant	-	-	-	-
rs151031233	11:7528401311:75284013	G/C	0.000 (C)	SNP	dbSNP	1000Genomes,	-	25 Downstream gene variant	-	-	-	-
ss1341923298	11:7528402611:75284026	G/C	0.000 (C)	SNP	1KG_phase3	-	-	25 Downstream gene variant	-	-	-	-
rs373388842	11:7528404711: between 75284047 & 75284048	-/TA	-	insertion	dbSNP	-	-	25 Downstream gene variant	-	-	-	-
rs182001718	11:7528404911:75284049	A/T	0.002 (T)	SNP	dbSNP	1000Genomes,	-	25 Downstream gene variant	-	-	-	-
rs371717390	11:7528405111:75284051	C/T	0.000 (T)	SNP	dbSNP	-	-	25 Downstream gene variant	-	-	-	-
ss1341923301	11:7528408111:75284081	C/T	0.000 (T)	SNP	1KG_phase3	-	-	25 Downstream gene variant	-	-	-	-
ss1341923302	11:7528411011:75284110	T/C	0.000 (C)	SNP	1KG_phase3	-	-	25 Downstream gene variant	-	-	-	-
ss1341923303	11:7528412311:75284123	C/G	0.000 (G)	SNP	1KG_phase3	-	-	25 Downstream gene variant	-	-	-	-
rs186503043	11:7528418511:75284185	C/T	0.002 (T)	SNP	dbSNP	1000Genomes,	-	25 Downstream gene variant	-	-	-	-
rs117161158	11:7528426611:75284266	G/A	0.011 (A)	SNP	dbSNP	Multiple_observations,1000Genomes,	-	25 Downstream gene variant	-	-	-	-
rs140962923	11:7528427911:75284279	C/T	0.004 (T)	SNP	dbSNP	Multiple_observations,1000Genomes,	-	25 Downstream gene variant	-	-	-	-
rs150217542	11:7528429511:75284295	C/T	0.000 (T)	SNP	dbSNP	1000Genomes,	-	25 Downstream gene variant	-	-	-	-
rs659418	11:7528433411:75284334	T/G	0.258 (G)	SNP	dbSNP	Multiple_observations,Frequency,1000Genomes,	-	25 Downstream gene variant	-	-	-	-
rs35569220	11:7528438011: between 75284380 & 75284381	-/C	-	insertion	dbSNP	-	-	25 Downstream gene variant	-	-	-	-
rs377550882	11:7528438611:75284386	C/T	-	SNP	dbSNP	-	-	25 Downstream gene variant	-	-	-	-
rs138816076	11:7528440411:75284404	T/A	0.002 (A)	SNP	dbSNP	Multiple_observations,1000Genomes,	-	25 Downstream gene variant	-	-	-	-
ss1341923310	11:7528443711:75284437	C/A	0.002 (A)	SNP	1KG_phase3	-	-	25 Downstream gene variant	-	-	-	-
rs372437750	11:7528445011:75284450	T/G	-	SNP	dbSNP	-	-	25 Downstream gene variant	-	-	-	-
rs370366770	11:7528446511:75284465	C/T	-	SNP	dbSNP	-	-	25 Downstream gene variant	-	-	-	-
ss1341923311	11:7528446611:75284466	G/A	0.000 (A)	SNP	1KG_phase3	-	-	25 Downstream gene variant	-	-	-	-
ss1341923312	11:7528447911:75284479	A/G	0.000 (G)	SNP	1KG_phase3	-	-	25 Downstream gene variant	-	-	-	-
ss1341923313	11:7528450311:75284503	G/A	0.001 (A)	SNP	1KG_phase3	-	-	25 Downstream gene variant	-	-	-	-
ss1341923314	11:7528452911:75284529	C/T	0.000 (T)	SNP	1KG_phase3	-	-	25 Downstream gene variant	-	-	-	-
rs375868010	11:7528460911:75284609	T/C	-	SNP	dbSNP	-	-	25 Downstream gene variant	-	-	-	-
rs630699	11:7528461411:75284614	C/T	-	SNP	dbSNP	Multiple_observations,	-	25 Downstream gene variant	-	-	-	-
ss1341923315	11:7528464311:75284643	C/T	0.000 (T)	SNP	1KG_phase3	-	-	25 Downstream gene variant	-	-	-	-
rs191441819	11:7528468711:75284687	G/A	0.002 (A)	SNP	dbSNP	1000Genomes,	-	25 Downstream gene variant	-	-	-	-
rs143164768	11:7528478911:75284789	C/T	-	SNP	dbSNP	Multiple_observations,1000Genomes,	-	25 Downstream gene variant	-	-	-	-
ss1341923317	11:7528479011:75284790	G/A	0.000 (A)	SNP	1KG_phase3	-	-	25 Downstream gene variant	-	-	-	-
rs147093974	11:7528480611:75284806	G/A	0.000 (A)	SNP	dbSNP	1000Genomes,	-	25 Downstream gene variant	-	-	-	-
ss1341923319	11:7528483911:75284839	C/T	0.000 (T)	SNP	1KG_phase3	-	-	25 Downstream gene variant	-	-	-	-
rs654388	11:7528484011:75284840	G/A	0.007 (A)	SNP	dbSNP	Multiple_observations,Frequency,1000Genomes,	-	25 Downstream gene variant	-	-	-	-
rs654759	11:7528489011:75284890	G/C	0.339 (C)	SNP	dbSNP	Multiple_observations,Frequency,1000Genomes,	-	25 Downstream gene variant	-	-	-	-
rs183711761	11:7528490011:75284900	T/C	0.002 (C)	SNP	dbSNP	1000Genomes,	-	25 Downstream gene variant	-	-	-	-
rs665798	11:7528500711:75285007	C/T	-	SNP	dbSNP	-	-	25 Downstream gene variant	-	-	-	-
rs376065930	11:7528503411:75285034	C/T	-	SNP	dbSNP	-	-	25 Downstream gene variant	-	-	-	-
rs376652089	11:7528506111:75285061	C/A	-	SNP	dbSNP	-	-	25 Downstream gene variant	-	-	-	-
ss1341923323	11:7528506411:75285064	C/T	0.000 (T)	SNP	1KG_phase3	-	-	25 Downstream gene variant	-	-	-	-
rs186154242	11:7528506511:75285065	G/A	0.002 (A)	SNP	dbSNP	Multiple_observations,1000Genomes,	-	25 Downstream gene variant	-	-	-	-
ss1341923325	11:7528507111:75285071	G/A	0.000 (A)	SNP	1KG_phase3	-	-	25 Downstream gene variant	-	-	-	-
ss1341923326	11:7528507311:75285073	C/A	0.000 (A)	SNP	1KG_phase3	-	-	25 Downstream gene variant	-	-	-	-
ss1341923327	11:7528508111:75285081	A/C	0.000 (C)	SNP	1KG_phase3	-	-	25 Downstream gene variant	-	-	-	-
rs673617	11:7528508711:75285087	C/T	-	SNP	dbSNP	-	-	25 Downstream gene variant	-	-	-	-
rs1144150	11:7528510911:75285109	G/C	0.248 (G)	SNP	dbSNP	Multiple_observations,Frequency,1000Genomes,	-	25 Downstream gene variant	-	-	-	-
rs191601084	11:7528511411:75285114	C/T	0.000 (T)	SNP	dbSNP	1000Genomes,	-	25 Downstream gene variant	-	-	-	-
rs673572	11:7528512511:75285125	C/T	-	SNP	dbSNP	-	-	25 Downstream gene variant	-	-	-	-
rs374494534	11:7528513111:75285131	T/C	-	SNP	dbSNP	-	-	25 Downstream gene variant	-	-	-	-
ss1341923330	11:7528513511:75285135	C/T	0.002 (T)	SNP	1KG_phase3	-	-	25 Downstream gene variant	-	-	-	-
rs487184	11:7528516311:75285163	C/T	-	SNP	dbSNP	-	-	25 Downstream gene variant	-	-	-	-
rs182165115	11:7528519711:75285197	C/A	0.002 (A)	SNP	dbSNP	1000Genomes,	-	25 Downstream gene variant	-	-	-	-
ss1371152041	11:7528520411:75285204	C/-	0.001 (-)	deletion	1KG_phase3	-	-	25 Downstream gene variant	-	-	-	-
rs186769500	11:7528521311:75285213	T/C	0.002 (C)	SNP	dbSNP	1000Genomes,	-	25 Downstream gene variant	-	-	-	-
ss1341923333	11:7528521911:75285219	T/G	0.000 (G)	SNP	1KG_phase3	-	-	25 Downstream gene variant	-	-	-	-
rs112453173	11:7528530211:75285302	G/T	0.020 (T)	SNP	dbSNP	Multiple_observations,1000Genomes,	-	25 Downstream gene variant	-	-	-	-
ss1341923335	11:7528530911:75285309	G/A	0.000 (A)	SNP	1KG_phase3	-	-	25 Downstream gene variant	-	-	-	-
rs116923386	11:7528532811:75285328	A/G	0.004 (G)	SNP	dbSNP	Multiple_observations,1000Genomes,	-	25 Downstream gene variant	-	-	-	-
ss1341923337	11:7528535911:75285359	T/A	0.000 (A)	SNP	1KG_phase3	-	-	25 Downstream gene variant	-	-	-	-
ss1341923338	11:7528538711:75285387	A/T	0.000 (T)	SNP	1KG_phase3	-	-	25 Downstream gene variant	-	-	-	-
ss1341923339	11:7528539011:75285390	C/G	0.000 (G)	SNP	1KG_phase3	-	-	25 Downstream gene variant	-	-	-	-
rs138520359	11:7528539811:75285398	A/G	0.000 (G)	SNP	dbSNP	Multiple_observations,1000Genomes,	-	25 Downstream gene variant	-	-	-	-
ss1341923341	11:7528539911:75285399	C/T	0.000 (T)	SNP	1KG_phase3	-	-	25 Downstream gene variant	-	-	-	-
rs192415984	11:7528543011:75285430	A/C	0.000 (C)	SNP	dbSNP	1000Genomes,	-	25 Downstream gene variant	-	-	-	-
rs75569201	11:7528547811:75285478	G/C	0.050 (C)	SNP	dbSNP	Multiple_observations,Frequency,1000Genomes,	-	25 Downstream gene variant	-	-	-	-
ss1371152044	11:7528548011:75285480-75285483	TAGG/-	0.003 (-)	deletion	1KG_phase3	-	-	25 Downstream gene variant	-	-	-	-
rs78400202	11:7528549211:75285492	G/A	0.054 (A)	SNP	dbSNP	Multiple_observations,Frequency,1000Genomes,	-	25 Downstream gene variant	-	-	-	-
rs144077987	11:7528549811:75285498	A/G	0.006 (G)	SNP	dbSNP	Multiple_observations,1000Genomes,	-	25 Downstream gene variant	-	-	-	-
rs79195304	11:7528554711:75285547	C/T	0.056 (T)	SNP	dbSNP	Multiple_observations,1000Genomes,	-	25 Downstream gene variant	-	-	-	-
ss1341923347	11:7528568611:75285686	T/A	0.000 (A)	SNP	1KG_phase3	-	-	25 Downstream gene variant	-	-	-	-
rs144405457	11:7528570011:75285700	C/T	0.000 (T)	SNP	dbSNP	Multiple_observations,1000Genomes,	-	25 Downstream gene variant	-	-	-	-
rs148610915	11:7528570311:75285703	T/C	0.000 (C)	SNP	dbSNP	1000Genomes,	-	25 Downstream gene variant	-	-	-	-
rs145543817	11:7528577911:75285779-75285780	AG/-	0.039 (-)	deletion	dbSNP	Multiple_observations,	-	25 Downstream gene variant	-	-	-	-
rs370035646	11:7528578011:75285780-75285781	GA/-	-	deletion	dbSNP	-	-	25 Downstream gene variant	-	-	-	-
rs183153033	11:7528579711:75285797	G/A	0.002 (A)	SNP	dbSNP	1000Genomes,	-	25 Downstream gene variant	-	-	-	-
ss1341923352	11:7528580711:75285807	A/G	0.000 (G)	SNP	1KG_phase3	-	-	25 Downstream gene variant	-	-	-	-
rs367629530	11:7528584911:75285849	C/T	-	SNP	dbSNP	-	-	25 Downstream gene variant	-	-	-	-
ss1341923353	11:7528589311:75285893	G/A	0.000 (A)	SNP	1KG_phase3	-	-	25 Downstream gene variant	-	-	-	-
ss1341923354	11:7528589911:75285899	G/A	0.000 (A)	SNP	1KG_phase3	-	-	25 Downstream gene variant	-	-	-	-
ss1341923355	11:7528590711:75285907	C/A	0.000 (A)	SNP	1KG_phase3	-	-	25 Downstream gene variant	-	-	-	-
ss1341923356	11:7528590911:75285909	A/G	0.000 (G)	SNP	1KG_phase3	-	-	25 Downstream gene variant	-	-	-	-
ss1341923357	11:7528591211:75285912	G/A	0.000 (A)	SNP	1KG_phase3	-	-	25 Downstream gene variant	-	-	-	-
ss1341923358	11:7528591311:75285913	G/T	0.000 (T)	SNP	1KG_phase3	-	-	25 Downstream gene variant	-	-	-	-
ss1341923359	11:7528591511:75285915	G/T	0.000 (T)	SNP	1KG_phase3	-	-	25 Downstream gene variant	-	-	-	-
rs189129695	11:7528592811:75285928	C/A/T	-	SNP	dbSNP	1000Genomes,	-	25 Downstream gene variant	-	-	-	-
rs189129695	11:7528592811:75285928	C/A/T	-	SNP	dbSNP	1000Genomes,	-	25 Downstream gene variant	-	-	-	-
rs138813603	11:7528594711:75285947-75285962	AGGTGGGGAGGGTGGT/-	0.004 (-)	deletion	dbSNP	Multiple_observations,	-	25 Downstream gene variant	-	-	-	-
ss1341923361	11:7528599811:75285998	C/T	0.000 (T)	SNP	1KG_phase3	-	-	25 Downstream gene variant	-	-	-	-
ss1341923362	11:7528605811:75286058	A/G	0.001 (G)	SNP	1KG_phase3	-	-	25 Downstream gene variant	-	-	-	-
rs141171956	11:7528608611:75286086	C/T	0.001 (T)	SNP	dbSNP	Multiple_observations,1000Genomes,	-	25 Downstream gene variant	-	-	-	-
ss1341923364	11:7528608911:75286089	G/A	0.000 (A)	SNP	1KG_phase3	-	-	25 Downstream gene variant	-	-	-	-
rs377222091	11:7528609011:75286090	C/T	-	SNP	dbSNP	-	-	25 Downstream gene variant	-	-	-	-
rs369737955	11:7528609111:75286091	C/T	-	SNP	dbSNP	-	-	25 Downstream gene variant	-	-	-	-
rs73505019	11:7528612411:75286124	C/T	0.008 (T)	SNP	dbSNP	Multiple_observations,Frequency,1000Genomes,	-	25 Downstream gene variant	-	-	-	-
rs192828922	11:7528614511:75286145	G/A	0.000 (A)	SNP	dbSNP	1000Genomes,	-	25 Downstream gene variant	-	-	-	-
ss1341923367	11:7528615111:75286151	A/G	0.000 (G)	SNP	1KG_phase3	-	-	25 Downstream gene variant	-	-	-	-
rs80176100	11:7528616411:75286164	G/T	0.055 (T)	SNP	dbSNP	Multiple_observations,1000Genomes,	-	25 Downstream gene variant	-	-	-	-
rs185297606	11:7528621011:75286210	A/G	0.001 (G)	SNP	dbSNP	1000Genomes,	-	25 Downstream gene variant	-	-	-	-
ss1341923370	11:7528625111:75286251	C/T	0.000 (T)	SNP	1KG_phase3	-	-	25 Downstream gene variant	-	-	-	-
rs189563042	11:7528634711:75286347	C/T	0.001 (T)	SNP	dbSNP	1000Genomes,	-	25 Downstream gene variant	-	-	-	-
rs192995499	11:7528634811:75286348	T/C	0.002 (C)	SNP	dbSNP	1000Genomes,	-	25 Downstream gene variant	-	-	-	-
ss1341923373	11:7528635111:75286351	A/G	0.000 (G)	SNP	1KG_phase3	-	-	25 Downstream gene variant	-	-	-	-
rs79261574	11:7528638611:75286386	G/T	0.031 (T)	SNP	dbSNP	Multiple_observations,1000Genomes,	-	25 Downstream gene variant	-	-	-	-
ss1341923375	11:7528644911:75286449	G/T	0.000 (T)	SNP	1KG_phase3	-	-	25 Downstream gene variant	-	-	-	-
rs79083728	11:7528648511:75286485	G/A	0.031 (A)	SNP	dbSNP	Multiple_observations,1000Genomes,	-	25 Downstream gene variant	-	-	-	-
rs150733749	11:7528649111:75286491	G/A	0.000 (A)	SNP	dbSNP	1000Genomes,	-	25 Downstream gene variant	-	-	-	-
rs139093316	11:7528649711:75286497	C/A	0.000 (A)	SNP	dbSNP	1000Genomes,	-	25 Downstream gene variant	-	-	-	-
rs373474538	11:7528651511:75286515	G/-	0.001 (-)	deletion	dbSNP	-	-	25 Downstream gene variant	-	-	-	-
ss1341923379	11:7528655411:75286554	G/T	0.001 (T)	SNP	1KG_phase3	-	-	25 Downstream gene variant	-	-	-	-
ss1341923380	11:7528663211:75286632	G/A	0.000 (A)	SNP	1KG_phase3	-	-	25 Downstream gene variant	-	-	-	-
rs183730503	11:7528663911:75286639	A/G	0.002 (G)	SNP	dbSNP	Multiple_observations,1000Genomes,	-	25 Downstream gene variant	-	-	-	-
ss1341923382	11:7528664911:75286649	C/T	0.000 (T)	SNP	1KG_phase3	-	-	25 Downstream gene variant	-	-	-	-
rs11236459	11:7528666111:75286661	G/A	0.013 (A)	SNP	dbSNP	Multiple_observations,Frequency,1000Genomes,	-	25 Downstream gene variant	-	-	-	-
ss1341923384	11:7528666411:75286664	G/A	0.000 (A)	SNP	1KG_phase3	-	-	25 Downstream gene variant	-	-	-	-
ss1341923385	11:7528668511:75286685	A/G	0.004 (G)	SNP	1KG_phase3	-	-	25 Downstream gene variant	-	-	-	-
ss1341923386	11:7528672711:75286727	C/T	0.000 (T)	SNP	1KG_phase3	-	-	25 Downstream gene variant	-	-	-	-
rs540808	11:7528674911:75286749	C/T	0.223 (T)	SNP	dbSNP	Multiple_observations,Frequency,1000Genomes,	-	25 Downstream gene variant	-	-	-	-
ss1341923388	11:7528675311:75286753	C/T	0.000 (T)	SNP	1KG_phase3	-	-	25 Downstream gene variant	-	-	-	-
rs112883957	11:7528682611:75286826	C/T	0.006 (T)	SNP	dbSNP	Multiple_observations,1000Genomes,	-	25 Downstream gene variant	-	-	-	-
rs144081592	11:7528682911:75286829	T/C	0.003 (C)	SNP	dbSNP	1000Genomes,	-	25 Downstream gene variant	-	-	-	-
rs370125710	11:7528693811:75286938	T/C	0.000 (C)	SNP	dbSNP	-	-	25 Downstream gene variant	-	-	-	-
rs146003796	11:7528693911:75286939	T/C	0.007 (C)	SNP	dbSNP	Multiple_observations,1000Genomes,	-	25 Downstream gene variant	-	-	-	-
ss1341923393	11:7528695911:75286959	G/C	0.000 (C)	SNP	1KG_phase3	-	-	25 Downstream gene variant	-	-	-	-
ss1341923394	11:7528700611:75287006	A/G	0.000 (G)	SNP	1KG_phase3	-	-	25 Downstream gene variant	-	-	-	-
rs374124950	11:7528703711:75287037	C/T	0.001 (T)	SNP	dbSNP	-	-	25 Downstream gene variant	-	-	-	-
ss1341923396	11:7528709811:75287098	T/A	0.000 (A)	SNP	1KG_phase3	-	-	25 Downstream gene variant	-	-	-	-
rs188170272	11:7528712411:75287124	A/G	0.002 (G)	SNP	dbSNP	Multiple_observations,1000Genomes,	-	25 Downstream gene variant	-	-	-	-
rs143483753	11:7528714011:75287140	A/G	0.002 (G)	SNP	dbSNP	Multiple_observations,1000Genomes,	-	25 Downstream gene variant	-	-	-	-
rs112942934	11:7528716011:75287160	G/A	0.002 (A)	SNP	dbSNP	Multiple_observations,1000Genomes,	-	25 Downstream gene variant	-	-	-	-
rs149128355	11:7528716711:75287167	T/C	0.000 (C)	SNP	dbSNP	1000Genomes,	-	25 Downstream gene variant	-	-	-	-
rs80222145	11:7528717011:75287170	C/T	0.009 (T)	SNP	dbSNP	Multiple_observations,1000Genomes,	-	25 Downstream gene variant	-	-	-	-
ss1341923402	11:7528717311:75287173	T/A	0.000 (A)	SNP	1KG_phase3	-	-	25 Downstream gene variant	-	-	-	-
rs73505021	11:7528718011:75287180	G/A	0.022 (A)	SNP	dbSNP	Multiple_observations,Frequency,1000Genomes,	-	25 Downstream gene variant	-	-	-	-
rs142274933	11:7528718511:75287185	T/C	0.002 (C)	SNP	dbSNP	Multiple_observations,1000Genomes,	-	25 Downstream gene variant	-	-	-	-
ss1341923405	11:7528720611:75287206	G/A	0.000 (A)	SNP	1KG_phase3	-	-	25 Downstream gene variant	-	-	-	-
rs608830	11:7528721911:75287219	C/T	0.113 (C)	SNP	dbSNP	Multiple_observations,Frequency,1000Genomes,	-	25 Downstream gene variant	-	-	-	-
ss1341923407	11:7528728911:75287289	G/T	0.000 (T)	SNP	1KG_phase3	-	-	25 Downstream gene variant	-	-	-	-
rs609309	11:7528734111:75287341	A/G	0.321 (A)	SNP	dbSNP	Multiple_observations,Frequency,HapMap,1000Genomes,	-	25 Downstream gene variant	-	-	-	-
rs180927635	11:7528736111:75287361	G/A	0.000 (A)	SNP	dbSNP	1000Genomes,	-	25 Downstream gene variant	-	-	-	-
ss1341923410	11:7528736911:75287369	C/T	0.000 (T)	SNP	1KG_phase3	-	-	25 Downstream gene variant	-	-	-	-
ss1341923411	11:7528740511:75287405	C/G	0.002 (G)	SNP	1KG_phase3	-	-	25 Downstream gene variant	-	-	-	-
rs376434641	11:7528743811:75287438	C/T	-	SNP	dbSNP	-	-	25 Downstream gene variant	-	-	-	-
rs184752936	11:7528744711:75287447	G/A	0.000 (A)	SNP	dbSNP	1000Genomes,	-	25 Downstream gene variant	-	-	-	-
ss1341923413	11:7528744811:75287448	G/A	0.000 (A)	SNP	1KG_phase3	-	-	25 Downstream gene variant	-	-	-	-
ss1341923414	11:7528747611:75287476	C/G	0.000 (G)	SNP	1KG_phase3	-	-	25 Downstream gene variant	-	-	-	-
rs141664630	11:7528750211:75287502	G/T	0.001 (T)	SNP	dbSNP	1000Genomes,	-	25 Downstream gene variant	-	-	-	-
rs61895092	11:7528750711:75287507	C/T	-	SNP	dbSNP	-	-	25 Downstream gene variant	-	-	-	-
ss1341923416	11:7528754111:75287541	C/G	0.000 (G)	SNP	1KG_phase3	-	-	25 Downstream gene variant	-	-	-	-
ss1341923417	11:7528756411:75287564	C/A	0.000 (A)	SNP	1KG_phase3	-	-	25 Downstream gene variant	-	-	-	-
rs202017717	11:7528757011:75287570	C/T	0.000 (T)	SNP	dbSNP	-	-	25 Downstream gene variant	-	-	-	-
rs114369059	11:7528761811:75287618	G/A	0.033 (A)	SNP	dbSNP	Multiple_observations,1000Genomes,	-	25 Downstream gene variant	-	-	-	-
rs377223438	11:7528764611:75287646	C/T	0.000 (T)	SNP	dbSNP	-	-	25 Downstream gene variant	-	-	-	-
rs200323580	11:7528765711:75287657	C/T	0.000 (T)	SNP	dbSNP	-	-	25 Downstream gene variant	-	-	-	-
ss1341923422	11:7528767411:75287674	C/T	0.000 (T)	SNP	1KG_phase3	-	-	25 Downstream gene variant	-	-	-	-
rs147071572	11:7528767511:75287675	G/A	0.000 (A)	SNP	dbSNP	1000Genomes,	-	25 Downstream gene variant	-	-	-	-
rs138459838	11:7528769511:75287695	C/A	0.002 (A)	SNP	dbSNP	1000Genomes,	-	25 Downstream gene variant	-	-	-	-
ss1341923425	11:7528770011:75287700	C/A	0.000 (A)	SNP	1KG_phase3	-	-	25 Downstream gene variant	-	-	-	-
ss1341923426	11:7528770111:75287701	G/A	0.000 (A)	SNP	1KG_phase3	-	-	25 Downstream gene variant	-	-	-	-
ss1341923427	11:7528772111:75287721	C/T	0.000 (T)	SNP	1KG_phase3	-	-	25 Downstream gene variant	-	-	-	-
ss1341923428	11:7528772511:75287725	T/C	0.000 (C)	SNP	1KG_phase3	-	-	25 Downstream gene variant	-	-	-	-
rs12577923	11:7528778211:75287782	A/G	0.013 (G)	SNP	dbSNP	Multiple_observations,Frequency,1000Genomes,	-	25 Downstream gene variant	-	-	-	-
rs1783555	11:7528785811:75287858	A/C	-	SNP	dbSNP	-	-	25 Downstream gene variant	-	-	-	-
rs368277460	11:7528786911:75287869	G/A	-	SNP	dbSNP	-	-	25 Downstream gene variant	-	-	-	-
rs676206	11:7528787511:75287875	C/A	0.285 (A)	SNP	dbSNP	Multiple_observations,Frequency,1000Genomes,	-	25 Downstream gene variant	-	-	-	-
rs111948632	11:7528791811: between 75287918 & 75287919	-/T	-	insertion	dbSNP	Multiple_observations,	-	25 Downstream gene variant	-	-	-	-
rs1793409	11:7528791911:75287919	T/C	-	SNP	dbSNP	Multiple_observations,	-	25 Downstream gene variant	-	-	-	-
rs142583856	11:7528798511:75287985	C/T	0.015 (T)	SNP	dbSNP	Multiple_observations,1000Genomes,	-	25 Downstream gene variant	-	-	-	-
rs367819042	11:7528802111:75288021	C/T	-	SNP	dbSNP	-	-	25 Downstream gene variant	-	-	-	-
ss1341923432	11:7528803411:75288034	G/A	0.000 (A)	SNP	1KG_phase3	-	-	25 Downstream gene variant	-	-	-	-
ss1341923433	11:7528805911:75288059	A/G	0.000 (G)	SNP	1KG_phase3	-	-	25 Downstream gene variant	-	-	-	-
rs150268662	11:7528809611:75288096	G/A	0.001 (A)	SNP	dbSNP	1000Genomes,	-	25 Downstream gene variant	-	-	-	-
rs2163661	11:7528815211:75288152	G/A	0.168 (A)	SNP	dbSNP	Multiple_observations,1000Genomes,	-	25 Downstream gene variant	-	-	-	-
ss1341923436	11:7528819811:75288198	C/T	0.000 (T)	SNP	1KG_phase3	-	-	25 Downstream gene variant	-	-	-	-
ss1341923437	11:7528822211:75288222	A/G	0.000 (G)	SNP	1KG_phase3	-	-	25 Downstream gene variant	-	-	-	-
ss1341923438	11:7528823911:75288239	G/A	0.000 (A)	SNP	1KG_phase3	-	-	25 Downstream gene variant	-	-	-	-
ss1341923439	11:7528829711:75288297	T/A	0.000 (A)	SNP	1KG_phase3	-	-	25 Downstream gene variant	-	-	-	-
ss1341923440	11:7528830711:75288307	G/A	0.000 (A)	SNP	1KG_phase3	-	-	25 Downstream gene variant	-	-	-	-
rs190636970	11:7528833111:75288331	A/G	0.007 (G)	SNP	dbSNP	1000Genomes,	-	25 Downstream gene variant	-	-	-	-
ss1341923442	11:7528833811:75288338	C/T	0.001 (T)	SNP	1KG_phase3	-	-	25 Downstream gene variant	-	-	-	-
ss1341923443	11:7528834211:75288342	T/C	0.000 (C)	SNP	1KG_phase3	-	-	25 Downstream gene variant	-	-	-	-
rs369347897	11:7528835311:75288353	G/A	-	SNP	dbSNP	-	-	25 Downstream gene variant	-	-	-	-
rs181705260	11:7528836311:75288363	G/C	0.010 (C)	SNP	dbSNP	Multiple_observations,1000Genomes,	-	25 Downstream gene variant	-	-	-	-
rs10713443	11:7528836711:75288367	C/-	-	deletion	dbSNP	Multiple_observations,	-	25 Downstream gene variant	-	-	-	-
rs149232010	11:7528857411:75288574	T/C	0.000 (C)	SNP	dbSNP	1000Genomes,	-	25 Downstream gene variant	-	-	-	-
rs144452225	11:7528861311:75288613	C/T	0.003 (T)	SNP	dbSNP	1000Genomes,	-	25 Downstream gene variant	-	-	-	-
rs187127230	11:7528867911:75288679	T/C	0.000 (C)	SNP	dbSNP	1000Genomes,	-	25 Downstream gene variant	-	-	-	-
rs376368922	11:7528868711:75288687	G/A	-	SNP	dbSNP	-	-	25 Downstream gene variant	-	-	-	-
rs191109946	11:7528869111:75288691	G/A	0.001 (A)	SNP	dbSNP	1000Genomes,	-	25 Downstream gene variant	-	-	-	-
rs75034290	11:7528880711:75288807	C/T	0.012 (T)	SNP	dbSNP	Multiple_observations,Frequency,1000Genomes,	-	25 Downstream gene variant	-	-	-	-
rs137917221	11:7528882511:75288825	G/A	0.002 (A)	SNP	dbSNP	1000Genomes,	-	25 Downstream gene variant	-	-	-	-
