# Supplementary material for: Mutational Hotspots and Protein Interactome Analyses of Collagen-Specific Chaperone&mdash;HSP47
Source: Preprints.org preprint supplement (doi:10.20944/preprints201811.0280.v1), 2018-11-12
Supplement: Supplementary file 2 [file TableS2_HSP47_gnomad.xlsx]

## Sheet: original
Chr_Pos_Ref_Alt	Chrom	Position	RSID	Reference	Alternate	Source	Filters - exomes	Filters - genomes	Consequence	Protein Consequence	Transcript Consequence	Annotation	Flags	Allele Count	Allele Number	Number of Homozygotes	Allele Frequency	Allele Count African	Allele Number African	Homozygote Count African	Allele Count Ashkenazi Jewish	Allele Number Ashkenazi Jewish	Homozygote Count Ashkenazi Jewish	Allele Count East Asian	Allele Number East Asian	Homozygote Count East Asian	Allele Count European (Finnish)	Allele Number European (Finnish)	Homozygote Count European (Finnish)	Allele Count European (Non-Finnish)	Allele Number European (Non-Finnish)	Homozygote Count European (Non-Finnish)	Allele Count Latino	Allele Number Latino	Homozygote Count Latino	Allele Count Other	Allele Number Other	Homozygote Count Other	Allele Count South Asian	Allele Number South Asian	Homozygote Count South Asian	isTv	isDerived	AnnoType	Consequence	ConsScore	ConsDetail	GC	CpG
11_75273043_A_G	11	75273043	rs760997021	A	G	G	NA	PASS				upstream gene		1	30872	0	0.03239	0	8696	0	0	302	0	0	1620	0	0	3492	0	1	14946	0	0	838	0	0	978	0	0	0	0	FALSE	TRUE	RegulatoryFeature	REGULATORY	4	regulatory	0.70	0.17
11_75273056_C_T	11	75273056	rs555619747	C	T	G	NA	PASS				upstream gene		7	30870	0	0.0002268	0	8702	0	0	302	0	6	1614	0	0	3492	0	1	14946	0	0	836	0	0	978	0	0	0	0	FALSE	TRUE	RegulatoryFeature	REGULATORY	4	regulatory	0.72	0.17
11_75273066_C_T	11	75273066	.	C	T	G	NA	PASS				upstream gene		1	30840	0	0.03243	1	8692	0	0	302	0	0	1612	0	0	3484	0	0	14936	0	0	836	0	0	978	0	0	0	0	FALSE	TRUE	RegulatoryFeature	REGULATORY	4	regulatory	0.74	0.16
11_75273067_C_G	11	75273067	.	C	G	G	NA	PASS				upstream gene		2	30874	0	0.06478	2	8700	0	0	302	0	0	1616	0	0	3492	0	0	14948	0	0	838	0	0	978	0	0	0	0	TRUE	TRUE	RegulatoryFeature	REGULATORY	4	regulatory	0.74	0.16
11_75273075_C_T	11	75273075	.	C	T	G	NA	PASS				upstream gene		3	30838	0	0.09728	0	8688	0	0	302	0	0	1616	0	0	3488	0	3	14926	0	0	838	0	0	980	0	0	0	0	FALSE	TRUE	RegulatoryFeature	REGULATORY	4	regulatory	0.76	0.17
11_75273076_C_A	11	75273076	.	C	A	G	NA	PASS				upstream gene		1	30808	0	0.03246	0	8686	0	0	302	0	1	1614	0	0	3486	0	0	14906	0	0	838	0	0	976	0	0	0	0	TRUE	TRUE	RegulatoryFeature	REGULATORY	4	regulatory	0.77	0.19
11_75273088_C_A	11	75273088	.	C	A	G	NA	PASS				upstream gene		2	30842	0	0.06485	2	8702	0	0	302	0	0	1616	0	0	3482	0	0	14928	0	0	838	0	0	974	0	0	0	0	TRUE	TRUE	RegulatoryFeature	REGULATORY	4	regulatory	0.76	0.19
11_75273103_T_C	11	75273103	.	T	C	G	NA	PASS			c.-340T>C	5' UTR		3	30744	0	0.09758	1	8688	0	0	300	0	0	1616	0	0	3488	0	2	14852	0	0	838	0	0	962	0	0	0	0	FALSE	TRUE	RegulatoryFeature	REGULATORY	4	regulatory	0.75	0.19
11_75273114_G_A	11	75273114	.	G	A	G	NA	PASS			c.-329G>A	5' UTR		1	30912	0	0.03235	1	8718	0	0	300	0	0	1618	0	0	3492	0	0	14974	0	0	838	0	0	972	0	0	0	0	FALSE	TRUE	RegulatoryFeature	REGULATORY	4	regulatory	0.74	0.19
11_75273117_C_T	11	75273117	.	C	T	G	NA	PASS			c.-326C>T	5' UTR		1	30820	0	0.03245	0	8686	0	0	300	0	0	1620	0	1	3484	0	0	14920	0	0	838	0	0	972	0	0	0	0	FALSE	TRUE	RegulatoryFeature	REGULATORY	4	regulatory	0.74	0.19
11_75273130_CA_C	11	75273130	rs533719133	CA	C	G	NA	PASS			c.-268delA	5' UTR		8	30828	0	0.0002595	1	8684	0	0	302	0	0	1620	0	0	3490	0	0	14916	0	1	836	0	6	980	0	0	0	0	NA	TRUE	Intergenic	UPSTREAM	1	upstream	0.76	0.20
11_75273137_A_AGGGGCCG	11	75273137	.	A	AGGGGCCG	G	NA	PASS			c.-251_-245dupGCCGGGG	5' UTR		2	30756	0	0.06503	2	8666	0	0	300	0	0	1622	0	0	3484	0	0	14878	0	0	836	0	0	970	0	0	0	0	NA	TRUE	Intergenic	UPSTREAM	1	upstream	0.75	0.20
11_75273141_G_A	11	75273141	.	G	A	G	NA	PASS			c.-258G>A	5' UTR		2	30908	0	0.06471	1	8700	0	0	302	0	0	1618	0	0	3492	0	1	14976	0	0	838	0	0	982	0	0	0	0	FALSE	TRUE	RegulatoryFeature	REGULATORY	4	regulatory	0.75	0.20
11_75273154_G_A	11	75273154	rs541047398	G	A	G	NA	PASS			c.-245G>A	5' UTR		7	30906	0	0.0002265	7	8704	0	0	300	0	0	1620	0	0	3492	0	0	14978	0	0	836	0	0	976	0	0	0	0	FALSE	TRUE	RegulatoryFeature	REGULATORY	4	regulatory	0.70	0.16
11_75273188_G_A	11	75273188	rs564033612	G	A	G	NA	PASS			c.-211G>A	5' UTR		23	30760	0	0.0007477	23	8656	0	0	302	0	0	1620	0	0	3468	0	0	14908	0	0	838	0	0	968	0	0	0	0	FALSE	TRUE	RegulatoryFeature	REGULATORY	4	regulatory	0.68	0.15
11_75273188_G_T	11	75273188	rs564033612	G	T	G	NA	PASS			c.-211G>T	5' UTR		3	30760	0	0.09753	0	8656	0	0	302	0	0	1620	0	1	3468	0	2	14908	0	0	838	0	0	968	0	0	0	0	TRUE	TRUE	RegulatoryFeature	REGULATORY	4	regulatory	0.68	0.15
11_75273208_A_G	11	75273208	rs865919284	A	G	G	NA	PASS			c.-191A>G	5' UTR		6	30802	0	0.0001948	6	8674	0	0	302	0	0	1622	0	0	3478	0	0	14916	0	0	836	0	0	974	0	0	0	0	FALSE	TRUE	RegulatoryFeature	REGULATORY	4	regulatory	0.63	0.12
11_75273210_G_A	11	75273210	rs185295615	G	A	G	NA	PASS			c.-189G>A	5' UTR		67	30880	1	0.002170	0	8698	0	0	302	0	67	1618	1	0	3478	0	0	14966	0	0	838	0	0	980	0	0	0	0	FALSE	TRUE	RegulatoryFeature	REGULATORY	4	regulatory	0.63	0.12
11_75273214_T_C	11	75273214	.	T	C	G	NA	PASS			c.-185T>C	5' UTR		5	30852	0	0.0001621	0	8684	0	0	302	0	5	1622	0	0	3482	0	0	14942	0	0	838	0	0	982	0	0	0	0	FALSE	TRUE	RegulatoryFeature	REGULATORY	4	regulatory	0.64	0.12
11_75273249_A_C	11	75273249	.	A	C	G	NA	PASS			c.-150A>C	5' UTR		1	30686	0	0.03259	0	8656	0	0	302	0	0	1614	0	0	3472	0	1	14828	0	0	836	0	0	978	0	0	0	0	TRUE	TRUE	RegulatoryFeature	REGULATORY	4	regulatory	0.61	0.16
11_75273249_AG_A	11	75273249	.	AG	A	G	NA	PASS			c.-145delG	5' UTR		2	30686	0	0.06518	0	8656	0	0	302	0	0	1614	0	0	3472	0	2	14828	0	0	836	0	0	978	0	0	0	0	NA	TRUE	Intergenic	UPSTREAM	1	upstream	0.61	0.16
11_75273251_G_T	11	75273251	.	G	T	G	NA	PASS			c.-148G>T	5' UTR		1	30888	0	0.03238	0	8700	0	0	302	0	0	1622	0	0	3486	0	1	14964	0	0	838	0	0	976	0	0	0	0	TRUE	TRUE	RegulatoryFeature	REGULATORY	4	regulatory	0.61	0.16
11_75273252_G_T	11	75273252	.	G	T	G	NA	PASS			c.-147G>T	5' UTR		1	30902	0	0.03236	0	8696	0	0	302	0	0	1622	0	0	3488	0	1	14976	0	0	838	0	0	980	0	0	0	0	TRUE	TRUE	RegulatoryFeature	REGULATORY	4	regulatory	0.61	0.16
11_75273254_G_A	11	75273254	.	G	A	G	NA	PASS			c.-145G>A	5' UTR		2	30874	0	0.06478	0	8690	0	0	302	0	0	1622	0	0	3482	0	2	14962	0	0	838	0	0	978	0	0	0	0	FALSE	TRUE	RegulatoryFeature	REGULATORY	4	regulatory	0.61	0.17
11_75273254_G_T	11	75273254	.	G	T	G	NA	PASS			c.-145G>T	5' UTR		2	30874	0	0.06478	0	8690	0	0	302	0	2	1622	0	0	3482	0	0	14962	0	0	838	0	0	978	0	0	0	0	TRUE	TRUE	RegulatoryFeature	REGULATORY	4	regulatory	0.61	0.17
11_75273297_TAAGAG_T	11	75273297	.	TAAGAG	T	G	NA	PASS			c.-101_-97delAAGAG	5' UTR		1	30834	0	0.03243	1	8682	0	0	302	0	0	1618	0	0	3490	0	0	14922	0	0	838	0	0	982	0	0	0	0	NA	TRUE	Intergenic	UPSTREAM	1	upstream	0.65	0.18
11_75273300_G_A	11	75273300	.	G	A	G	NA	PASS			c.-99G>A	5' UTR		2	30916	0	0.06469	0	8702	0	0	302	0	2	1620	0	0	3490	0	0	14982	0	0	838	0	0	982	0	0	0	0	FALSE	TRUE	RegulatoryFeature	REGULATORY	4	regulatory	0.66	0.19
11_75273301_A_T	11	75273301	.	A	T	G	NA	PASS			c.-98A>T	5' UTR		1	30850	0	0.03241	0	8690	0	0	302	0	0	1616	0	0	3488	0	1	14934	0	0	838	0	0	982	0	0	0	0	TRUE	TRUE	RegulatoryFeature	REGULATORY	4	regulatory	0.66	0.19
11_75273314_C_A	11	75273314	.	C	A	G	NA	PASS			c.-85C>A	5' UTR		1	30872	0	0.03239	0	8708	0	0	302	0	0	1618	0	0	3482	0	0	14950	0	0	838	0	1	974	0	0	0	0	TRUE	TRUE	RegulatoryFeature	REGULATORY	4	regulatory	0.68	0.20
11_75273314_C_T	11	75273314	.	C	T	G	NA	PASS			c.-85C>T	5' UTR		1	30872	0	0.03239	0	8708	0	0	302	0	0	1618	0	0	3482	0	1	14950	0	0	838	0	0	974	0	0	0	0	FALSE	TRUE	RegulatoryFeature	REGULATORY	4	regulatory	0.68	0.20
11_75273317_G_A	11	75273317	.	G	A	G	NA	PASS			c.-82G>A	5' UTR		2	30894	0	0.06474	2	8704	0	0	302	0	0	1622	0	0	3490	0	0	14958	0	0	838	0	0	980	0	0	0	0	FALSE	TRUE	RegulatoryFeature	REGULATORY	4	regulatory	0.68	0.20
11_75273321_C_G	11	75273321	.	C	G	G	NA	PASS			c.-78C>G	5' UTR		4	30858	0	0.0001296	0	8702	0	0	302	0	0	1620	0	0	3488	0	4	14930	0	0	838	0	0	978	0	0	0	0	TRUE	TRUE	RegulatoryFeature	REGULATORY	4	regulatory	0.68	0.21
11_75273326_G_A	11	75273326	rs78251872	G	A	G	NA	PASS			c.-73G>A	5' UTR		911	30850	43	0.02953	890	8674	43	5	302	0	0	1620	0	0	3488	0	7	14952	0	6	838	0	3	976	0	0	0	0	FALSE	TRUE	RegulatoryFeature	REGULATORY	4	regulatory	0.70	0.23
11_75273337_G_C	11	75273337	.	G	C	G	NA	PASS			c.-62G>C	5' UTR		4	30832	0	0.0001297	4	8692	0	0	302	0	0	1618	0	0	3486	0	0	14918	0	0	838	0	0	978	0	0	0	0	TRUE	TRUE	RegulatoryFeature	REGULATORY	4	regulatory	0.70	0.25
11_75273339_C_T	11	75273339	.	C	T	G	NA	PASS			c.-60C>T	5' UTR		1	30850	0	0.03241	1	8698	0	0	302	0	0	1618	0	0	3484	0	0	14932	0	0	838	0	0	978	0	0	0	0	FALSE	TRUE	RegulatoryFeature	REGULATORY	4	regulatory	0.70	0.25
11_75273358_G_A	11	75273358	.	G	A	G	NA	PASS			c.-41G>A	5' UTR		1	30872	0	0.03239	1	8698	0	0	302	0	0	1620	0	0	3488	0	0	14944	0	0	838	0	0	982	0	0	0	0	FALSE	TRUE	RegulatoryFeature	REGULATORY	4	regulatory	0.73	0.26
11_75273374_G_A	11	75273374	.	G	A	G	NA	PASS			c.-47G>A	5' UTR		1	30916	0	0.03235	1	8718	0	0	302	0	0	1620	0	0	3486	0	0	14970	0	0	838	0	0	982	0	0	0	0	FALSE	TRUE	RegulatoryFeature	REGULATORY	4	regulatory	0.72	0.26
11_75273375_G_A	11	75273375	.	G	A	G	NA	PASS			c.-46G>A	5' UTR		8	30926	0	0.0002587	1	8720	0	0	302	0	0	1622	0	0	3488	0	7	14974	0	0	838	0	0	982	0	0	0	0	FALSE	TRUE	RegulatoryFeature	REGULATORY	4	regulatory	0.72	0.26
11_75273381_G_C	11	75273381	.	G	C	G	NA	PASS			c.-40G>C	5' UTR		1	30914	0	0.03235	1	8716	0	0	302	0	0	1622	0	0	3486	0	0	14968	0	0	838	0	0	982	0	0	0	0	TRUE	TRUE	RegulatoryFeature	REGULATORY	4	regulatory	0.74	0.26
11_75273384_T_C	11	75273384	.	T	C	G	NA	PASS	c.-37T>Câ€		c.-37T>C	splice region		1	30806	0	0.03246	0	8710	0	0	302	0	0	1618	0	0	3480	0	1	14882	0	0	836	0	0	978	0	0	0	0	FALSE	TRUE	RegulatoryFeature	REGULATORY	4	regulatory	0.75	0.26
11_75273396_G_A	11	75273396	rs552213304	G	A	G	NA	PASS			c.-62G>A	5' UTR		105	30902	0	0.003398	102	8712	0	0	302	0	0	1620	0	0	3486	0	0	14962	0	3	838	0	0	982	0	0	0	0	FALSE	TRUE	RegulatoryFeature	REGULATORY	4	regulatory	0.74	0.25
11_75273405_A_AGCGCCGAGCAATCTGGGGGT	11	75273405	.	A	AGCGCCGAGCAATCTGGGGGT	G	NA	PASS			c.-48_-35+6dupCGAGCAATCTGGGGGTGCGC	5' UTR		3	30752	0	0.09755	0	8688	0	0	302	0	3	1614	0	0	3478	0	0	14868	0	0	836	0	0	966	0	0	0	0	NA	TRUE	Intergenic	UPSTREAM	1	upstream	0.74	0.24
11_75273414_C_A	11	75273414	.	C	A	G	NA	PASS			c.-44C>A	5' UTR		1	30870	0	0.03239	1	8708	0	0	302	0	0	1622	0	0	3486	0	0	14932	0	0	838	0	0	982	0	0	0	0	TRUE	TRUE	RegulatoryFeature	REGULATORY	4	regulatory	0.74	0.23
11_75273466_T_C	11	75273466	.	T	C	G	NA	PASS			c.-1384T>C	5' UTR		1	30828	0	0.03244	1	8702	0	0	302	0	0	1616	0	0	3490	0	0	14910	0	0	838	0	0	970	0	0	0	0	FALSE	TRUE	RegulatoryFeature	REGULATORY	4	regulatory	0.68	0.17
11_75273476_A_T	11	75273476	.	A	T	G	NA	PASS			c.-1374A>T	5' UTR		1	30920	0	0.03234	0	8718	0	0	302	0	1	1622	0	0	3486	0	0	14976	0	0	838	0	0	978	0	0	0	0	TRUE	TRUE	RegulatoryFeature	REGULATORY	4	regulatory	0.66	0.15
11_75273490_A_T	11	75273490	.	A	T	G	NA	PASS			c.-1360A>T	5' UTR		1	30934	0	0.03233	1	8716	0	0	302	0	0	1618	0	0	3490	0	0	14988	0	0	838	0	0	982	0	0	0	0	TRUE	TRUE	RegulatoryFeature	REGULATORY	4	regulatory	0.64	0.12
11_75273510_TG_T	11	75273510	rs199898881	TG	T	G	NA	PASS			c.-1335delG	5' UTR		90	30926	0	0.002910	86	8720	0	0	302	0	0	1620	0	0	3490	0	3	14974	0	1	838	0	0	982	0	0	0	0	NA	TRUE	RegulatoryFeature	REGULATORY	4	regulatory	0.64	0.11
11_75273516_C_T	11	75273516	rs566342735	C	T	G	NA	PASS			c.-1334C>T	5' UTR		90	30934	0	0.002909	86	8720	0	0	302	0	0	1620	0	0	3494	0	3	14980	0	1	838	0	0	980	0	0	0	0	FALSE	TRUE	RegulatoryFeature	REGULATORY	4	regulatory	0.65	0.12
11_75273525_GGTTTGGAATCGAGA_G	11	75273525	.	GGTTTGGAATCGAGA	G	G	NA	PASS			c.-1323_-1310delTTTGGAATCGAGAG	5' UTR		1	30954	0	0.03231	1	8726	0	0	302	0	0	1622	0	0	3492	0	0	14992	0	0	838	0	0	982	0	0	0	0	NA	TRUE	RegulatoryFeature	REGULATORY	4	regulatory	0.65	0.12
11_75273529_T_G	11	75273529	.	T	G	G	NA	PASS			c.-1321T>G	5' UTR		2	30912	0	6.47e-5	0	8718	0	0	302	0	2	1618	0	0	3492	0	0	14962	0	0	838	0	0	982	0	0	0	0	TRUE	TRUE	RegulatoryFeature	REGULATORY	4	regulatory	0.65	0.12
11_75273540_G_T	11	75273540	.	G	T	G	NA	PASS			c.-1310G>T	5' UTR		2	30926	0	0.06467	0	8718	0	0	302	0	0	1620	0	0	3492	0	2	14976	0	0	838	0	0	980	0	0	0	0	TRUE	TRUE	RegulatoryFeature	REGULATORY	4	regulatory	0.64	0.11
11_75273572_G_A	11	75273572	.	G	A	G	NA	PASS			c.-1278G>A	5' UTR		1	30958	0	3.23e-5	1	8726	0	0	302	0	0	1620	0	0	3494	0	0	14998	0	0	838	0	0	980	0	0	0	0	FALSE	TRUE	RegulatoryFeature	REGULATORY	4	regulatory	0.64	0.11
11_75273583_G_A	11	75273583	rs374185865	G	A	G	NA	PASS			c.-1267G>A	5' UTR		6	30948	0	0.0001939	6	8726	0	0	300	0	0	1620	0	0	3492	0	0	14994	0	0	838	0	0	978	0	0	0	0	FALSE	TRUE	RegulatoryFeature	REGULATORY	4	regulatory	0.63	0.09
11_75273595_G_C	11	75273595	rs190109537	G	C	G	NA	PASS			c.-1255G>C	5' UTR		3	30948	0	0.09694	0	8722	0	0	302	0	0	1622	0	0	3492	0	2	14994	0	1	838	0	0	978	0	0	0	0	TRUE	TRUE	RegulatoryFeature	REGULATORY	4	regulatory	0.62	0.09
11_75273606_C_A	11	75273606	.	C	A	G	NA	PASS			c.-1244C>A	5' UTR		1	30928	0	0.03233	1	8722	0	0	302	0	0	1622	0	0	3492	0	0	14978	0	0	838	0	0	974	0	0	0	0	TRUE	TRUE	RegulatoryFeature	REGULATORY	4	regulatory	0.62	0.09
11_75273626_G_A	11	75273626	.	G	A	G	NA	PASS			c.-1224G>A	5' UTR		1	30868	0	3.24e-5	1	8704	0	0	300	0	0	1620	0	0	3494	0	0	14942	0	0	838	0	0	970	0	0	0	0	FALSE	TRUE	RegulatoryFeature	REGULATORY	4	regulatory	0.62	0.08
11_75273636_A_C	11	75273636	.	A	C	G	NA	PASS			c.-1214A>C	5' UTR		5	30914	0	0.0001617	5	8718	0	0	302	0	0	1622	0	0	3494	0	0	14964	0	0	838	0	0	976	0	0	0	0	TRUE	TRUE	RegulatoryFeature	REGULATORY	4	regulatory	0.62	0.08
11_75273639_G_C	11	75273639	.	G	C	G	NA	PASS			c.-1211G>C	5' UTR		1	30924	0	0.03234	1	8718	0	0	302	0	0	1622	0	0	3494	0	0	14976	0	0	836	0	0	976	0	0	0	0	TRUE	TRUE	RegulatoryFeature	REGULATORY	4	regulatory	0.62	0.08
11_75273668_G_A	11	75273668	.	G	A	G	NA	PASS			c.-1182G>A	5' UTR		1	30914	0	0.03235	1	8720	0	0	302	0	0	1618	0	0	3492	0	0	14974	0	0	836	0	0	972	0	0	0	0	FALSE	TRUE	RegulatoryFeature	REGULATORY	4	regulatory	0.59	0.07
11_75273698_G_GGCAGAGA	11	75273698	.	G	GGCAGAGA	G	NA	PASS			c.-1145_-1139dupAGCAGAG	5' UTR		1	30922	0	0.03234	0	8728	0	0	302	0	0	1618	0	0	3494	0	1	14962	0	0	836	0	0	982	0	0	0	0	NA	TRUE	RegulatoryFeature	REGULATORY	4	regulatory	0.58	0.04
11_75273714_T_TCTGCGGAAAGAAACA	11	75273714	.	T	TCTGCGGAAAGAAACA	G	NA	PASS			c.-1135_-1121dupCTGCGGAAAGAAACA	5' UTR		1	30912	0	0.03235	0	8724	0	0	302	0	0	1620	0	0	3490	0	1	14960	0	0	836	0	0	980	0	0	0	0	NA	TRUE	RegulatoryFeature	REGULATORY	4	regulatory	0.60	0.05
11_75273728_C_G	11	75273728	rs180875574	C	G	G	NA	PASS			c.-1122C>G	5' UTR		32	30914	0	0.001035	31	8722	0	0	302	0	0	1620	0	0	3490	0	0	14968	0	0	836	0	1	976	0	0	0	0	TRUE	TRUE	RegulatoryFeature	REGULATORY	4	regulatory	0.61	0.07
11_75273730_G_A	11	75273730	rs569784797	G	A	G	NA	PASS			c.-1120G>A	5' UTR		1	30932	0	0.03233	0	8720	0	0	302	0	1	1620	0	0	3494	0	0	14980	0	0	836	0	0	980	0	0	0	0	FALSE	TRUE	RegulatoryFeature	REGULATORY	4	regulatory	0.60	0.07
11_75273735_G_A	11	75273735	.	G	A	G	NA	PASS			c.-1115G>A	5' UTR		1	30936	0	0.03232	1	8726	0	0	302	0	0	1620	0	0	3492	0	0	14982	0	0	836	0	0	978	0	0	0	0	FALSE	TRUE	RegulatoryFeature	REGULATORY	4	regulatory	0.60	0.07
11_75273754_G_A	11	75273754	rs535616229	G	A	G	NA	PASS			c.-1096G>A	5' UTR		6	30924	0	0.0001940	0	8716	0	0	302	0	6	1622	0	0	3492	0	0	14972	0	0	838	0	0	982	0	0	0	0	FALSE	TRUE	RegulatoryFeature	REGULATORY	4	regulatory	0.61	0.07
11_75273761_C_G	11	75273761	rs570435126	C	G	G	NA	PASS			c.-1089C>G	5' UTR		3	30920	0	0.09702	0	8722	0	0	302	0	0	1622	0	0	3494	0	2	14962	0	0	836	0	1	982	0	0	0	0	TRUE	TRUE	RegulatoryFeature	REGULATORY	4	regulatory	0.63	0.07
11_75273766_A_G	11	75273766	.	A	G	G	NA	PASS			c.-1084A>G	5' UTR		1	30922	0	0.03234	0	8722	0	0	302	0	0	1622	0	0	3494	0	0	14964	0	1	838	0	0	980	0	0	0	0	FALSE	TRUE	RegulatoryFeature	REGULATORY	4	regulatory	0.64	0.08
11_75273768_G_A	11	75273768	.	G	A	G	NA	PASS			c.-1082G>A	5' UTR		1	30946	0	0.03231	0	8728	0	0	302	0	1	1622	0	0	3494	0	0	14982	0	0	838	0	0	980	0	0	0	0	FALSE	TRUE	RegulatoryFeature	REGULATORY	4	regulatory	0.62	0.08
11_75273777_G_A	11	75273777	.	G	A	G	NA	PASS			c.-1073G>A	5' UTR		2	30936	0	0.06465	2	8720	0	0	302	0	0	1622	0	0	3494	0	0	14980	0	0	838	0	0	980	0	0	0	0	FALSE	TRUE	RegulatoryFeature	REGULATORY	4	regulatory	0.62	0.08
11_75273784_C_T	11	75273784	rs369733471	C	T	G	NA	PASS			c.-1066C>T	5' UTR		1	30924	0	0.03234	0	8716	0	0	302	0	1	1620	0	0	3494	0	0	14974	0	0	838	0	0	980	0	0	0	0	FALSE	TRUE	RegulatoryFeature	REGULATORY	4	regulatory	0.63	0.08
11_75273791_C_T	11	75273791	rs555239987	C	T	G	NA	PASS			c.-1059C>T	5' UTR		2	30918	0	0.06469	2	8714	0	0	302	0	0	1622	0	0	3494	0	0	14970	0	0	836	0	0	980	0	0	0	0	FALSE	TRUE	RegulatoryFeature	REGULATORY	4	regulatory	0.62	0.08
11_75273798_C_T	11	75273798	rs374147271	C	T	G	NA	PASS			c.-1052C>T	5' UTR		7	30916	0	0.0002264	2	8714	0	0	302	0	0	1620	0	0	3494	0	0	14970	0	0	836	0	5	980	0	0	0	0	FALSE	TRUE	RegulatoryFeature	REGULATORY	4	regulatory	0.62	0.07
11_75273818_G_T	11	75273818	.	G	T	G	NA	PASS			c.-1032G>T	5' UTR		1	30936	0	0.03232	1	8720	0	0	302	0	0	1620	0	0	3494	0	0	14980	0	0	838	0	0	982	0	0	0	0	TRUE	TRUE	RegulatoryFeature	REGULATORY	4	regulatory	0.62	0.08
11_75273831_G_A	11	75273831	rs867290877	G	A	G	NA	PASS			c.-1019G>A	5' UTR		5	30922	0	0.0001617	2	8720	0	0	302	0	0	1622	0	0	3494	0	3	14968	0	0	838	0	0	978	0	0	0	0	FALSE	TRUE	RegulatoryFeature	REGULATORY	4	regulatory	0.62	0.08
11_75273840_T_G	11	75273840	.	T	G	G	NA	PASS			c.-1010T>G	5' UTR		1	30886	0	0.03238	1	8706	0	0	302	0	0	1620	0	0	3494	0	0	14944	0	0	838	0	0	982	0	0	0	0	TRUE	TRUE	RegulatoryFeature	REGULATORY	4	regulatory	0.61	0.08
11_75273849_G_A	11	75273849	.	G	A	G	NA	PASS			c.-1001G>A	5' UTR		1	30922	0	0.03234	0	8714	0	0	302	0	0	1620	0	0	3494	0	1	14972	0	0	838	0	0	982	0	0	0	0	FALSE	TRUE	RegulatoryFeature	REGULATORY	4	regulatory	0.61	0.09
11_75273850_C_T	11	75273850	.	C	T	G	NA	PASS			c.-1000C>T	5' UTR		2	30902	0	0.06472	0	8710	0	0	302	0	0	1618	0	0	3490	0	2	14962	0	0	838	0	0	982	0	0	0	0	FALSE	TRUE	RegulatoryFeature	REGULATORY	4	regulatory	0.61	0.09
11_75273861_C_T	11	75273861	rs557791925	C	T	G	NA	PASS			c.-989C>T	5' UTR		3	30918	0	0.09703	2	8712	0	0	302	0	0	1622	0	0	3494	0	0	14970	0	1	838	0	0	980	0	0	0	0	FALSE	TRUE	RegulatoryFeature	REGULATORY	4	regulatory	0.62	0.09
11_75273877_G_A	11	75273877	.	G	A	G	NA	PASS			c.-973G>A	5' UTR		2	30934	0	0.06465	0	8718	0	0	302	0	2	1618	0	0	3492	0	0	14984	0	0	838	0	0	982	0	0	0	0	FALSE	TRUE	RegulatoryFeature	REGULATORY	4	regulatory	0.60	0.08
11_75273903_G_A	11	75273903	rs543196585	G	A	G	NA	PASS			c.-947G>A	5' UTR		23	30940	0	0.0007434	0	8714	0	0	302	0	0	1620	0	10	3494	0	12	14992	0	0	838	0	1	980	0	0	0	0	FALSE	TRUE	RegulatoryFeature	REGULATORY	4	regulatory	0.58	0.08
11_75273910_A_G	11	75273910	.	A	G	G	NA	PASS			c.-940A>G	5' UTR		1	30912	0	0.03235	1	8708	0	0	302	0	0	1618	0	0	3492	0	0	14976	0	0	838	0	0	978	0	0	0	0	FALSE	TRUE	RegulatoryFeature	REGULATORY	4	regulatory	0.57	0.08
11_75273943_G_A	11	75273943	.	G	A	G	NA	PASS			c.-907G>A	5' UTR		1	30936	0	0.03232	1	8716	0	0	302	0	0	1620	0	0	3494	0	0	14986	0	0	838	0	0	980	0	0	0	0	FALSE	TRUE	RegulatoryFeature	REGULATORY	4	regulatory	0.54	0.07
11_75273983_C_T	11	75273983	.	C	T	G	NA	PASS			c.-867C>T	5' UTR		1	30936	0	0.03232	0	8716	0	0	302	0	0	1620	0	0	3494	0	1	14986	0	0	838	0	0	980	0	0	0	0	FALSE	TRUE	RegulatoryFeature	REGULATORY	4	regulatory	0.54	0.08
11_75273991_C_T	11	75273991	.	C	T	G	NA	PASS			c.-859C>T	5' UTR		1	30928	0	0.03233	1	8712	0	0	302	0	0	1622	0	0	3492	0	0	14984	0	0	836	0	0	980	0	0	0	0	FALSE	TRUE	RegulatoryFeature	REGULATORY	4	regulatory	0.56	0.07
11_75274027_G_A	11	75274027	rs376324002	G	A	G	NA	PASS			c.-823G>A	5' UTR		82	30940	0	0.002650	6	8712	0	1	302	0	0	1622	0	10	3494	0	57	14992	0	3	838	0	5	980	0	0	0	0	FALSE	TRUE	RegulatoryFeature	REGULATORY	4	regulatory	0.57	0.04
11_75274045_G_GA	11	75274045	.	G	GA	G	NA	PASS			c.-799dupA	5' UTR		28	30816	0	0.0009086	28	8706	0	0	302	0	0	1622	0	0	3480	0	0	14896	0	0	838	0	0	972	0	0	0	0	NA	TRUE	RegulatoryFeature	REGULATORY	4	regulatory	0.53	0.03
11_75274051_A_AG	11	75274051	rs796543761	A	AG	G	NA	PASS			c.-798dupG	5' UTR		14	30960	0	0.0004522	14	8720	0	0	302	0	0	1622	0	0	3494	0	0	15002	0	0	838	0	0	982	0	0	0	0	NA	TRUE	RegulatoryFeature	REGULATORY	4	regulatory	0.54	0.03
11_75274061_G_A	11	75274061	rs11236457	G	A	G	NA	PASS	c.-79G>Aâ€		c.-79G>A	splice region		1211	30936	54	0.03915	834	8702	45	11	302	0	1	1622	0	100	3492	2	218	15000	5	13	838	0	34	980	2	0	0	0	FALSE	TRUE	RegulatoryFeature	REGULATORY	4	regulatory	0.55	0.03
11_75274064_C_A	11	75274064	.	C	A	G	NA	PASS	c.-79+3C>Aâ€		c.-79+3C>A	splice region		3	30938	0	0.09697	3	8708	0	0	302	0	0	1622	0	0	3492	0	0	14994	0	0	838	0	0	982	0	0	0	0	TRUE	TRUE	RegulatoryFeature	REGULATORY	4	regulatory	0.55	0.03
11_75274089_A_G	11	75274089	.	A	G	G	NA	PASS			c.-761A>G	5' UTR		2	30938	0	0.06465	0	8718	0	0	302	0	0	1618	0	0	3492	0	2	14990	0	0	838	0	0	980	0	0	0	0	FALSE	TRUE	RegulatoryFeature	REGULATORY	4	regulatory	0.55	0.03
11_75274141_G_A	11	75274141	.	G	A	G	NA	PASS			c.-709G>A	5' UTR		3	30936	0	0.09697	2	8716	0	0	302	0	1	1622	0	0	3494	0	0	14984	0	0	838	0	0	980	0	0	0	0	FALSE	TRUE	RegulatoryFeature	REGULATORY	4	regulatory	0.55	0.00
11_75274150_G_T	11	75274150	rs590121	G	T	G	NA	PASS			c.-700G>T	5' UTR		11060	30840	2051	0.3586	4028	8676	932	78	300	8	285	1620	24	1233	3488	225	4820	14936	760	301	838	48	315	982	54	0	0	0	TRUE	TRUE	RegulatoryFeature	REGULATORY	4	regulatory	0.53	0.00
11_75274163_G_T	11	75274163	rs560221554	G	T	G	NA	PASS			c.-687G>T	5' UTR		106	30930	1	0.003427	7	8718	0	0	302	0	0	1622	0	4	3492	0	91	14978	1	1	838	0	3	980	0	0	0	0	TRUE	TRUE	RegulatoryFeature	REGULATORY	4	regulatory	0.53	0.00
11_75274191_G_A	11	75274191	.	G	A	G	NA	PASS			c.-659G>A	5' UTR		1	30924	0	0.03234	0	8718	0	0	302	0	0	1622	0	0	3490	0	1	14974	0	0	838	0	0	980	0	0	0	0	FALSE	TRUE	RegulatoryFeature	REGULATORY	4	regulatory	0.53	0.00
11_75274205_G_A	11	75274205	.	G	A	G	NA	PASS			c.-645G>A	5' UTR		1	30920	0	0.03234	0	8714	0	0	302	0	0	1618	0	0	3494	0	1	14976	0	0	838	0	0	978	0	0	0	0	FALSE	TRUE	RegulatoryFeature	REGULATORY	4	regulatory	0.56	0.00
11_75274210_C_G	11	75274210	.	C	G	G	NA	PASS			c.-640C>G	5' UTR		1	30940	0	0.03232	0	8716	0	0	302	0	0	1622	0	0	3494	0	1	14988	0	0	838	0	0	980	0	0	0	0	TRUE	TRUE	RegulatoryFeature	REGULATORY	4	regulatory	0.55	0.00
11_75274215_T_G	11	75274215	rs80147742	T	G	G	NA	PASS			c.-635T>G	5' UTR		94	30936	3	0.003039	94	8714	3	0	302	0	0	1622	0	0	3494	0	0	14988	0	0	838	0	0	978	0	0	0	0	TRUE	TRUE	RegulatoryFeature	REGULATORY	4	regulatory	0.55	0.00
11_75274218_G_C	11	75274218	.	G	C	G	NA	PASS			c.-632G>C	5' UTR		1	30944	0	0.03232	1	8714	0	0	302	0	0	1622	0	0	3494	0	0	14994	0	0	838	0	0	980	0	0	0	0	TRUE	TRUE	RegulatoryFeature	REGULATORY	4	regulatory	0.55	0.00
11_75274224_T_G	11	75274224	.	T	G	G	NA	PASS			c.-626T>G	5' UTR		1	30948	0	0.03231	0	8720	0	0	302	0	0	1620	0	0	3494	0	1	14994	0	0	838	0	0	980	0	0	0	0	TRUE	TRUE	RegulatoryFeature	REGULATORY	4	regulatory	0.56	0.00
11_75274246_G_A	11	75274246	.	G	A	G	NA	PASS			c.-604G>A	5' UTR		1	30936	0	0.03232	0	8716	0	0	302	0	0	1622	0	0	3494	0	0	14984	0	1	838	0	0	980	0	0	0	0	FALSE	TRUE	RegulatoryFeature	REGULATORY	4	regulatory	0.58	0.01
11_75274250_G_A	11	75274250	.	G	A	G	NA	PASS			c.-600G>A	5' UTR		2	30954	0	0.06461	1	8724	0	0	302	0	0	1622	0	0	3494	0	1	14996	0	0	838	0	0	978	0	0	0	0	FALSE	TRUE	RegulatoryFeature	REGULATORY	4	regulatory	0.59	0.01
11_75274289_C_T	11	75274289	.	C	T	G	NA	PASS			c.-561C>T	5' UTR		1	30940	0	0.03232	1	8724	0	0	302	0	0	1622	0	0	3494	0	0	14980	0	0	838	0	0	980	0	0	0	0	FALSE	TRUE	RegulatoryFeature	REGULATORY	4	regulatory	0.58	0.04
11_75274311_G_A	11	75274311	.	G	A	G	NA	PASS			c.-539G>A	5' UTR		2	30956	0	0.06461	0	8726	0	0	302	0	0	1622	0	0	3494	0	2	14994	0	0	838	0	0	980	0	0	0	0	FALSE	TRUE	RegulatoryFeature	REGULATORY	4	regulatory	0.59	0.07
11_75274319_C_T	11	75274319	.	C	T	G	NA	PASS			c.-531C>T	5' UTR		1	30954	0	0.03231	1	8724	0	0	302	0	0	1620	0	0	3492	0	0	14996	0	0	838	0	0	982	0	0	0	0	FALSE	TRUE	RegulatoryFeature	REGULATORY	4	regulatory	0.62	0.08
11_75274322_T_A	11	75274322	.	T	A	G	NA	PASS			c.-528T>A	5' UTR		1	30954	0	0.03231	0	8722	0	0	302	0	0	1622	0	0	3494	0	1	14996	0	0	838	0	0	980	0	0	0	0	TRUE	TRUE	RegulatoryFeature	REGULATORY	4	regulatory	0.61	0.08
11_75274327_T_A	11	75274327	.	T	A	G	NA	PASS			c.-523T>A	5' UTR		1	30942	0	0.03232	1	8720	0	0	302	0	0	1622	0	0	3494	0	0	14984	0	0	838	0	0	982	0	0	0	0	TRUE	TRUE	RegulatoryFeature	REGULATORY	4	regulatory	0.62	0.08
11_75274334_C_T	11	75274334	.	C	T	G	NA	PASS			c.-516C>T	5' UTR		2	30948	0	0.06462	1	8720	0	0	302	0	0	1620	0	0	3494	0	1	14992	0	0	838	0	0	982	0	0	0	0	FALSE	TRUE	RegulatoryFeature	REGULATORY	4	regulatory	0.62	0.08
11_75274336_C_G	11	75274336	rs192234220	C	G	G	NA	PASS			c.-514C>G	5' UTR		8	30944	0	0.0002585	0	8722	0	0	302	0	8	1620	0	0	3490	0	0	14990	0	0	838	0	0	982	0	0	0	0	TRUE	TRUE	RegulatoryFeature	REGULATORY	4	regulatory	0.63	0.08
11_75274356_A_G	11	75274356	.	A	G	G	NA	PASS			c.-494A>G	5' UTR		1	30918	0	0.03234	0	8712	0	0	302	0	0	1618	0	0	3492	0	1	14976	0	0	836	0	0	982	0	0	0	0	FALSE	TRUE	RegulatoryFeature	REGULATORY	4	regulatory	0.61	0.08
11_75274358_G_A	11	75274358	rs113206982	G	A	G	NA	PASS			c.-492G>A	5' UTR		39	30942	0	0.001260	39	8724	0	0	302	0	0	1622	0	0	3490	0	0	14984	0	0	838	0	0	982	0	0	0	0	FALSE	TRUE	RegulatoryFeature	REGULATORY	4	regulatory	0.62	0.08
11_75274385_G_A	11	75274385	rs534964992	G	A	G	NA	PASS			c.-465G>A	5' UTR		8	30922	0	0.0002587	0	8722	0	0	302	0	8	1622	0	0	3486	0	0	14972	0	0	838	0	0	980	0	0	0	0	FALSE	TRUE	RegulatoryFeature	REGULATORY	4	regulatory	0.62	0.09
11_75274396_C_T	11	75274396	rs527599700	C	T	G	NA	PASS			c.-454C>T	5' UTR		2	30940	0	0.06464	2	8726	0	0	302	0	0	1622	0	0	3490	0	0	14982	0	0	838	0	0	980	0	0	0	0	FALSE	TRUE	RegulatoryFeature	REGULATORY	4	regulatory	0.62	0.09
11_75274415_G_C	11	75274415	.	G	C	G	NA	PASS			c.-435G>C	5' UTR		1	30916	0	0.03235	1	8726	0	0	302	0	0	1622	0	0	3488	0	0	14960	0	0	838	0	0	980	0	0	0	0	TRUE	TRUE	RegulatoryFeature	REGULATORY	4	regulatory	0.58	0.07
11_75274428_A_G	11	75274428	.	A	G	G	NA	PASS			c.-422A>G	5' UTR		2	30848	0	0.06483	2	8710	0	0	302	0	0	1618	0	0	3482	0	0	14924	0	0	834	0	0	978	0	0	0	0	FALSE	TRUE	RegulatoryFeature	REGULATORY	4	regulatory	0.55	0.07
11_75274428_AT_A	11	75274428	.	AT	A	G	NA	PASS			c.-421delT	5' UTR		1	30848	0	0.03242	0	8710	0	0	302	0	0	1618	0	0	3482	0	1	14924	0	0	834	0	0	978	0	0	0	0	NA	TRUE	RegulatoryFeature	REGULATORY	4	regulatory	0.55	0.07
11_75274430_C_T	11	75274430	.	C	T	G	NA	PASS			c.-420C>T	5' UTR		1	30898	0	0.03236	0	8718	0	0	302	0	0	1622	0	0	3488	0	1	14952	0	0	836	0	0	980	0	0	0	0	FALSE	TRUE	RegulatoryFeature	REGULATORY	4	regulatory	0.56	0.07
11_75274434_C_A	11	75274434	.	C	A	G	NA	PASS			c.-416C>A	5' UTR		1	30914	0	0.03235	1	8726	0	0	302	0	0	1622	0	0	3490	0	0	14956	0	0	836	0	0	982	0	0	0	0	TRUE	TRUE	RegulatoryFeature	REGULATORY	4	regulatory	0.56	0.07
11_75274434_C_G	11	75274434	.	C	G	G	NA	PASS			c.-416C>G	5' UTR		1	30914	0	0.03235	0	8726	0	0	302	0	0	1622	0	0	3490	0	0	14956	0	1	836	0	0	982	0	0	0	0	TRUE	TRUE	RegulatoryFeature	REGULATORY	4	regulatory	0.56	0.07
11_75274455_C_A	11	75274455	.	C	A	G	NA	PASS			c.-395C>A	5' UTR		1	30916	0	0.03235	1	8718	0	0	302	0	0	1622	0	0	3488	0	0	14966	0	0	838	0	0	982	0	0	0	0	TRUE	TRUE	RegulatoryFeature	REGULATORY	4	regulatory	0.56	0.07
11_75274485_T_G	11	75274485	.	T	G	G	NA	PASS			c.-365T>G	5' UTR		2	29780	0	0.06716	0	8612	0	0	280	0	0	1604	0	0	3046	0	2	14564	0	0	756	0	0	918	0	0	0	0	TRUE	TRUE	RegulatoryFeature	REGULATORY	4	regulatory	0.55	0.04
11_75274519_G_C	11	75274519	.	G	C	G	NA	PASS			c.-331G>C	5' UTR		1	30880	0	0.03238	0	8720	0	0	302	0	0	1618	0	0	3482	0	1	14946	0	0	836	0	0	976	0	0	0	0	TRUE	TRUE	RegulatoryFeature	REGULATORY	4	regulatory	0.55	0.03
11_75274522_T_C	11	75274522	.	T	C	G	NA	PASS			c.-328T>C	5' UTR		1	30928	0	0.03233	0	8720	0	0	302	0	0	1622	0	0	3488	0	1	14978	0	0	836	0	0	982	0	0	0	0	FALSE	TRUE	RegulatoryFeature	REGULATORY	4	regulatory	0.56	0.03
11_75274527_C_T	11	75274527	.	C	T	G	NA	PASS			c.-323C>T	5' UTR		2	30912	0	6.47e-5	0	8722	0	0	302	0	1	1620	0	1	3486	0	0	14966	0	0	838	0	0	978	0	0	0	0	FALSE	TRUE	RegulatoryFeature	REGULATORY	4	regulatory	0.57	0.04
11_75274535_A_AG	11	75274535	.	A	AG	G	NA	PASS			c.-311dupG	5' UTR		1	30816	0	0.03245	0	8696	0	0	302	0	0	1620	0	0	3484	0	1	14900	0	0	838	0	0	976	0	0	0	0	NA	TRUE	RegulatoryFeature	REGULATORY	4	regulatory	0.58	0.04
11_75274610_G_A	11	75274610	.	G	A	G	NA	PASS			c.-240G>A	5' UTR		1	30918	0	0.03234	0	8724	0	0	302	0	0	1622	0	0	3488	0	0	14964	0	1	838	0	0	980	0	0	0	0	FALSE	TRUE	RegulatoryFeature	REGULATORY	4	regulatory	0.60	0.03
11_75274617_C_T	11	75274617	.	C	T	G	NA	PASS			c.-233C>T	5' UTR		1	30926	0	0.03234	0	8728	0	0	302	0	0	1622	0	0	3492	0	0	14964	0	1	838	0	0	980	0	0	0	0	FALSE	TRUE	RegulatoryFeature	REGULATORY	4	regulatory	0.58	0.03
11_75274623_C_T	11	75274623	.	C	T	G	NA	PASS			c.-227C>T	5' UTR		2	30944	0	0.06463	2	8730	0	0	302	0	0	1620	0	0	3492	0	0	14980	0	0	838	0	0	982	0	0	0	0	FALSE	TRUE	RegulatoryFeature	REGULATORY	4	regulatory	0.59	0.03
11_75274630_T_C	11	75274630	rs681390	T	C	G	NA	PASS			c.-220T>C	5' UTR		12783	30822	2815	0.4147	5153	8710	1528	89	302	9	500	1616	72	1296	3486	236	5022	14898	825	355	832	73	368	978	72	0	0	0	FALSE	FALSE	RegulatoryFeature	REGULATORY	4	regulatory	0.60	0.04
11_75274630_T_G	11	75274630	rs681390	T	G	G	NA	PASS			c.-220T>G	5' UTR		1	30822	0	0.03244	0	8710	0	0	302	0	0	1616	0	0	3486	0	1	14898	0	0	832	0	0	978	0	0	0	0	TRUE	TRUE	RegulatoryFeature	REGULATORY	4	regulatory	0.60	0.04
11_75274659_G_A	11	75274659	rs111567312	G	A	G	NA	PASS			c.-191G>A	5' UTR		184	30940	0	0.005947	107	8732	0	0	302	0	41	1620	0	1	3490	0	14	14980	0	14	838	0	7	978	0	0	0	0	FALSE	TRUE	RegulatoryFeature	REGULATORY	4	regulatory	0.60	0.04
11_75274673_C_G	11	75274673	.	C	G	G	NA	PASS			c.-177C>G	5' UTR		1	30934	0	0.03233	0	8726	0	0	300	0	0	1622	0	0	3488	0	1	14980	0	0	838	0	0	980	0	0	0	0	TRUE	TRUE	RegulatoryFeature	REGULATORY	4	regulatory	0.63	0.05
11_75274673_C_T	11	75274673	.	C	T	G	NA	PASS			c.-177C>T	5' UTR		1	30934	0	0.03233	0	8726	0	0	300	0	0	1622	0	0	3488	0	1	14980	0	0	838	0	0	980	0	0	0	0	FALSE	TRUE	RegulatoryFeature	REGULATORY	4	regulatory	0.63	0.05
11_75274687_C_A	11	75274687	rs589374	C	A	G	NA	PASS			c.-163C>A	5' UTR		11984	30856	2756	0.3884	1304	8716	98	151	302	34	307	1620	28	1556	3482	348	7980	14922	2109	252	838	35	434	976	104	0	0	0	TRUE	TRUE	RegulatoryFeature	REGULATORY	4	regulatory	0.60	0.05
11_75274689_G_C	11	75274689	.	G	C	G	NA	PASS			c.-161G>C	5' UTR		3	30950	0	0.09693	3	8730	0	0	302	0	0	1622	0	0	3490	0	0	14986	0	0	838	0	0	982	0	0	0	0	TRUE	TRUE	RegulatoryFeature	REGULATORY	4	regulatory	0.59	0.05
11_75274691_T_G	11	75274691	.	T	G	G	NA	PASS			c.-159T>G	5' UTR		1	30948	0	0.03231	1	8730	0	0	302	0	0	1622	0	0	3492	0	0	14982	0	0	838	0	0	982	0	0	0	0	TRUE	TRUE	RegulatoryFeature	REGULATORY	4	regulatory	0.58	0.05
11_75274696_C_T	11	75274696	rs187992902	C	T	G	NA	PASS			c.-154C>T	5' UTR		2	30948	0	0.06462	0	8730	0	0	302	0	0	1622	0	1	3492	0	1	14982	0	0	838	0	0	982	0	0	0	0	FALSE	TRUE	RegulatoryFeature	REGULATORY	4	regulatory	0.57	0.05
11_75274703_C_T	11	75274703	rs545326903	C	T	G	NA	PASS			c.-147C>T	5' UTR		5	30954	0	0.0001615	5	8728	0	0	302	0	0	1622	0	0	3492	0	0	14992	0	0	838	0	0	980	0	0	0	0	FALSE	TRUE	RegulatoryFeature	REGULATORY	4	regulatory	0.54	0.05
11_75274725_T_C	11	75274725	rs78860282	T	C	G	NA	PASS			c.-125T>C	5' UTR		377	30918	10	0.01219	372	8722	10	0	302	0	0	1622	0	0	3488	0	0	14968	0	3	838	0	2	978	0	0	0	0	FALSE	TRUE	RegulatoryFeature	REGULATORY	4	regulatory	0.57	0.05
11_75274732_T_A	11	75274732	rs537676611	T	A	G	NA	PASS			c.-118T>A	5' UTR		1	30950	0	0.03231	0	8728	0	0	302	0	0	1622	0	0	3492	0	0	14988	0	0	838	0	1	980	0	0	0	0	TRUE	TRUE	RegulatoryFeature	REGULATORY	4	regulatory	0.56	0.05
11_75274743_G_T	11	75274743	.	G	T	G	NA	PASS			c.-107G>T	5' UTR		4	30930	0	0.0001293	0	8724	0	0	302	0	0	1622	0	0	3494	0	4	14970	0	0	838	0	0	980	0	0	0	0	TRUE	TRUE	RegulatoryFeature	REGULATORY	4	regulatory	0.56	0.04
11_75274753_C_G	11	75274753	.	C	G	G	NA	PASS			c.-97C>G	5' UTR		7	30948	0	0.0002262	6	8726	0	0	300	0	0	1622	0	1	3492	0	0	14990	0	0	838	0	0	980	0	0	0	0	TRUE	TRUE	Transcript	5PRIME_UTR	3	5_prime_UTR	0.55	0.04
11_75274755_C_T	11	75274755	rs138800808	C	T	G	NA	PASS			c.-95C>T	5' UTR		122	30964	0	0.003940	3	8726	0	0	300	0	0	1622	0	53	3492	0	56	15004	0	0	838	0	10	982	0	0	0	0	FALSE	TRUE	Transcript	5PRIME_UTR	3	5_prime_UTR	0.55	0.04
11_75274771_G_T	11	75274771	.	G	T	G	NA	PASS	c.-78-1G>Tâ€		c.-78-1G>T	splice acceptor	LC LoF	1	30842	0	0.03242	0	8704	0	0	300	0	0	1620	0	0	3470	0	1	14930	0	0	838	0	0	980	0	0	0	0	TRUE	TRUE	Transcript	5PRIME_UTR	3	5_prime_UTR	0.55	0.04
11_75274807_A_G	11	75274807	.	A	G	G	NA	PASS			c.-43A>G	5' UTR		3	30958	0	0.09691	0	8728	0	3	302	0	0	1622	0	0	3494	0	0	14996	0	0	838	0	0	978	0	0	0	0	FALSE	TRUE	Transcript	5PRIME_UTR	3	5_prime_UTR	0.54	0.03
11_75274820_T_C	11	75274820	.	T	C	G	NA	PASS	c.-35+5T>C		c.-35+5T>C	splice region		1	30958	0	3.23e-5	0	8728	0	0	302	0	0	1622	0	0	3494	0	1	14996	0	0	838	0	0	978	0	0	0	0	FALSE	TRUE	Transcript	SPLICE_SITE	5	splice,intron	0.52	0.00
11_75274856_GT_G	11	75274856	.	GT	G	G	NA	PASS			c.-35+42delT	intron		1	30950	0	0.03231	0	8734	0	0	302	0	0	1620	0	0	3492	0	1	14986	0	0	838	0	0	978	0	0	0	0	NA	TRUE	RegulatoryFeature	REGULATORY	4	regulatory	0.59	0.00
11_75274859_C_G	11	75274859	.	C	G	G	NA	PASS			c.-35+44C>G	intron		4	30948	0	0.0001292	0	8734	0	0	302	0	0	1618	0	1	3494	0	2	14984	0	0	838	0	1	978	0	0	0	0	TRUE	TRUE	RegulatoryFeature	REGULATORY	4	regulatory	0.58	0.00
11_75274871_C_T	11	75274871	.	C	T	G	NA	PASS			c.-35+56C>T	intron		1	30960	0	3.23e-5	1	8732	0	0	302	0	0	1620	0	0	3494	0	0	14996	0	0	838	0	0	978	0	0	0	0	FALSE	TRUE	RegulatoryFeature	REGULATORY	4	regulatory	0.55	0.00
11_75274872_C_G	11	75274872	.	C	G	G	NA	PASS			c.-35+57C>G	intron		3	30964	0	0.09689	0	8734	0	0	302	0	0	1620	0	0	3494	0	3	14998	0	0	838	0	0	978	0	0	0	0	TRUE	TRUE	RegulatoryFeature	REGULATORY	4	regulatory	0.55	0.00
11_75274888_C_G	11	75274888	rs546777647	C	G	G	NA	PASS			c.-35+73C>G	intron		22	30962	0	0.0007105	22	8734	0	0	302	0	0	1620	0	0	3494	0	0	14996	0	0	838	0	0	978	0	0	0	0	TRUE	TRUE	RegulatoryFeature	REGULATORY	4	regulatory	0.54	0.00
11_75277295_T_C	11	75277295	rs189348278	T	C	G	NA	PASS			c.-34-66T>C	intron		13	30948	0	0.0004201	0	8724	0	0	302	0	13	1622	0	0	3490	0	0	14990	0	0	838	0	0	982	0	0	0	0	FALSE	TRUE	Transcript	INTRONIC	2	intron	0.60	0.01
11_75277300_G_A	11	75277300	.	G	A	G	NA	PASS			c.-34-61G>A	intron		1	30962	0	3.23e-5	0	8730	0	0	302	0	0	1620	0	0	3494	0	1	14996	0	0	838	0	0	982	0	0	0	0	FALSE	TRUE	Transcript	INTRONIC	2	intron	0.61	0.01
11_75277306_G_A	11	75277306	rs375603549	G	A	G	NA	PASS			c.-34-55G>A	intron		3	30958	0	0.09691	0	8726	0	0	302	0	3	1622	0	0	3494	0	0	14994	0	0	838	0	0	982	0	0	0	0	FALSE	TRUE	Transcript	INTRONIC	2	intron	0.61	0.03
11_75277310_G_A	11	75277310	.	G	A	G	NA	PASS			c.-34-51G>A	intron		1	30956	0	3.23e-5	0	8730	0	0	302	0	0	1622	0	0	3494	0	1	14988	0	0	838	0	0	982	0	0	0	0	FALSE	TRUE	Transcript	INTRONIC	2	intron	0.61	0.03
11_75277332_A_G	11	75277332	.	A	G	G	NA	PASS			c.-34-29A>G	intron		1	30950	0	0.03231	1	8722	0	0	302	0	0	1622	0	0	3494	0	0	14990	0	0	838	0	0	982	0	0	0	0	FALSE	TRUE	Transcript	INTRONIC	2	intron	0.63	0.04
11_75277342_G_A	11	75277342	.	G	A	G	NA	PASS			c.-34-19G>A	intron		2	30958	0	6.46e-5	2	8726	0	0	302	0	0	1622	0	0	3492	0	0	14996	0	0	838	0	0	982	0	0	0	0	FALSE	TRUE	Transcript	INTRONIC	2	intron	0.62	0.04
11_75277351_A_G	11	75277351	rs547981367	A	G	E	PASS	NA			c.-34-10A>G	intron		5	199500	0	0.02506	1	10968	0	1	8776	0	3	14828	0	0	18472	0	0	86264	0	0	29298	0	0	4648	0	0	26246	0	FALSE	TRUE	Transcript	INTRONIC	2	intron	0.62	0.05
11_75277357_A_C	11	75277357	.	A	C	E	PASS	NA	c.-34-4A>C		c.-34-4A>C	splice region		1	205864	0	0.004858	0	11338	0	0	8876	0	0	15334	0	0	18940	0	1	89842	0	0	30020	0	0	4760	0	0	26754	0	TRUE	TRUE	Transcript	SPLICE_SITE	5	splice,intron	0.62	0.05
11_75277372_T_C	11	75277372	rs139447737	T	C	E G	PASS	PASS			c.-23T>C	5' UTR		136	249584	1	0.0005449	120	20906	1	0	9450	0	0	17702	0	0	23356	0	0	111922	0	15	32384	0	1	5942	0	0	27922	0	FALSE	TRUE	Transcript	5PRIME_UTR	3	5_prime_UTR	0.64	0.07
11_75277375_A_T	11	75277375	rs771699372	A	T	E	PASS	NA			c.-20A>T	5' UTR		1	220806	0	0.004529	0	12376	0	0	9190	0	0	16224	0	0	20052	0	1	98044	0	0	31754	0	0	5000	0	0	28166	0	TRUE	TRUE	Transcript	5PRIME_UTR	3	5_prime_UTR	0.65	0.08
11_75277376_C_G	11	75277376	rs78910605	C	G	E	PASS	NA			c.-19C>G	5' UTR		1	221414	0	0.004516	0	12350	0	0	9208	0	1	16270	0	0	20106	0	0	98380	0	0	31842	0	0	5014	0	0	28244	0	TRUE	TRUE	Transcript	5PRIME_UTR	3	5_prime_UTR	0.65	0.08
11_75277376_C_T	11	75277376	rs78910605	C	T	E G	PASS	PASS			c.-19C>T	5' UTR		2315	252372	118	0.009173	2152	21074	118	6	9510	0	0	17890	0	0	23600	0	12	113378	0	125	32680	0	14	5996	0	6	28244	0	FALSE	TRUE	Transcript	5PRIME_UTR	3	5_prime_UTR	0.65	0.08
11_75277377_G_A	11	75277377	.	G	A	E G	RF	PASS			c.-18G>A	5' UTR		1	30958	0	3.23e-5	0	8732	0	0	302	0	0	1622	0	0	3492	0	1	14990	0	0	838	0	0	982	0	0	0	0	FALSE	TRUE	Transcript	5PRIME_UTR	3	5_prime_UTR	0.66	0.09
11_75277381_A_T	11	75277381	rs369900182	A	T	E	PASS	NA			c.-14A>T	5' UTR		5	224692	0	0.02225	0	12644	0	0	9274	0	0	16412	0	0	20456	0	0	100080	0	0	32192	0	0	5088	0	5	28546	0	TRUE	TRUE	Transcript	5PRIME_UTR	3	5_prime_UTR	0.66	0.09
11_75277386_T_C	11	75277386	rs765666013	T	C	E	PASS	NA			c.-9T>C	5' UTR		2	226470	0	0.008831	1	12782	0	0	9308	0	0	16520	0	0	20580	0	1	101032	0	0	32352	0	0	5130	0	0	28766	0	FALSE	TRUE	Transcript	5PRIME_UTR	3	5_prime_UTR	0.65	0.09
11_75277391_G_A	11	75277391	.	G	A	E G	RF	PASS			c.-4G>A	5' UTR		1	30974	0	0.03229	0	8736	0	0	302	0	0	1622	0	0	3494	0	1	15000	0	0	838	0	0	982	0	0	0	0	FALSE	TRUE	Transcript	5PRIME_UTR	3	5_prime_UTR	0.64	0.09
11_75277392_GC_G	11	75277392	.	GC	G	E	PASS	NA			c.-1delC	5' UTR		1	227730	0	0.004391	0	12936	0	0	9334	0	0	16582	0	0	20676	0	0	101630	0	1	32438	0	0	5130	0	0	29004	0	NA	TRUE	Transcript	5PRIME_UTR	3	5_prime_UTR,feature_truncation	0.64	0.09
11_75277394_C_G	11	75277394	.	C	G	E	PASS	NA			c.-1C>G	5' UTR		1	228628	0	0.004374	0	13020	0	0	9364	0	0	16612	0	0	20760	0	0	102044	0	1	32534	0	0	5154	0	0	29140	0	TRUE	TRUE	Transcript	5PRIME_UTR	3	5_prime_UTR	0.64	0.09
11_75277396_TGC_T	11	75277396	.	TGC	T	E	PASS	NA	p.Arg2LeufsTer142	p.Arg2LeufsTer142	c.5_6delGC	frameshift		1	229602	0	0.004355	0	13146	0	0	9398	0	0	16672	0	0	20842	0	1	102488	0	0	32628	0	0	5180	0	0	29248	0	NA	TRUE	CodingTranscript	FRAME_SHIFT	7	frameshift,feature_truncation	0.65	0.10
11_75277412_T_C	11	75277412	.	T	C	G	NA	PASS	p.Leu6Leu	p.Leu6Leu	c.18T>C	synonymous		1	30958	0	3.23e-5	0	8734	0	0	302	0	1	1620	0	0	3492	0	0	14992	0	0	838	0	0	980	0	0	0	0	FALSE	TRUE	CodingTranscript	SYNONYMOUS	5	synonymous	0.66	0.11
11_75277413_C_T	11	75277413	rs764762999	C	T	E	PASS	NA	p.Leu7Phe	p.Leu7Phe	c.19C>T	missense		2	232522	0	0.008601	0	13356	0	0	9462	0	0	16816	0	0	21108	0	1	103898	0	0	32880	0	0	5258	0	1	29744	0	FALSE	TRUE	CodingTranscript	NON_SYNONYMOUS	7	missense	0.66	0.11
11_75277422_T_G	11	75277422	rs751588882	T	G	E	PASS	NA	p.Phe10Val	p.Phe10Val	c.28T>G	missense		4	232812	0	0.01718	0	13368	0	0	9500	0	0	16798	0	0	21134	0	0	103922	0	0	32954	0	0	5228	0	4	29908	0	TRUE	TRUE	CodingTranscript	NON_SYNONYMOUS	7	missense	0.66	0.12
11_75277423_T_C	11	75277423	rs757293522	T	C	E	PASS	NA	p.Phe10Ser	p.Phe10Ser	c.29T>C	missense		4	232988	0	0.01717	0	13388	0	0	9506	0	0	16808	0	0	21132	0	0	104032	0	0	32976	0	0	5236	0	4	29910	0	FALSE	TRUE	CodingTranscript	NON_SYNONYMOUS	7	missense	0.66	0.12
11_75277432_T_A	11	75277432	rs767726256	T	A	E	PASS	NA	p.Leu13Gln	p.Leu13Gln	c.38T>A	missense		1	232354	0	0.004304	0	13278	0	0	9474	0	0	16788	0	0	21080	0	1	103544	0	0	32972	0	0	5210	0	0	30008	0	TRUE	TRUE	CodingTranscript	NON_SYNONYMOUS	7	missense	0.67	0.12
11_75277434_G_A	11	75277434	rs750583954	G	A	E G	PASS	PASS	p.Glu14Lys	p.Glu14Lys	c.40G>A	missense		2	263162	0	7.6e-6	0	21984	0	0	9764	0	2	18402	0	0	24538	0	0	118470	0	0	33810	0	0	6186	0	0	30008	0	FALSE	TRUE	CodingTranscript	NON_SYNONYMOUS	7	missense	0.67	0.12
11_75277434_G_C	11	75277434	rs750583954	G	C	E	PASS	NA	p.Glu14Gln	p.Glu14Gln	c.40G>C	missense		1	232196	0	0.004307	0	13248	0	0	9462	0	1	16780	0	0	21046	0	0	103474	0	0	32972	0	0	5206	0	0	30008	0	TRUE	TRUE	CodingTranscript	NON_SYNONYMOUS	7	missense	0.67	0.12
11_75277439_G_C	11	75277439	rs756380782	G	C	E	PASS	NA	c.42+3G>Câ€		c.42+3G>C	splice region		1	231826	0	0.004314	0	13216	0	0	9474	0	0	16726	0	0	20984	0	1	103278	0	0	32936	0	0	5202	0	0	30010	0	TRUE	TRUE	CodingTranscript	SYNONYMOUS	5	synonymous	0.67	0.13
11_75277445_G_A	11	75277445	.	G	A	E	PASS	NA	p.Leu17Leu	p.Leu17Leu	c.51G>A	synonymous		1	231436	0	0.004321	0	13136	0	0	9466	0	0	16728	0	0	20856	0	1	103064	0	0	32970	0	0	5178	0	0	30038	0	FALSE	TRUE	CodingTranscript	SYNONYMOUS	5	synonymous	0.68	0.13
11_75277448_C_T	11	75277448	rs369807954	C	T	E	PASS	NA	p.Ala18Ala	p.Ala18Ala	c.54C>T	synonymous		4	232152	0	0.01723	4	13236	0	0	9514	0	0	16774	0	0	20958	0	0	103370	0	0	33014	0	0	5190	0	0	30096	0	FALSE	TRUE	CodingTranscript	SYNONYMOUS	5	synonymous	0.67	0.13
11_75277449_G_A	11	75277449	rs778730843	G	A	E G	PASS	PASS	p.Ala19Thr	p.Ala19Thr	c.55G>A	missense		4	263280	0	0.01519	0	22010	0	0	9818	0	0	18380	0	0	24468	0	1	118420	0	3	33868	0	0	6186	0	0	30130	0	FALSE	TRUE	CodingTranscript	NON_SYNONYMOUS	7	missense	0.67	0.13
11_75277451_C_A	11	75277451	rs771513145	C	A	E	PASS	NA	p.Ala19Ala	p.Ala19Ala	c.57C>A	synonymous		1	233070	0	0.004291	0	13346	0	0	9538	0	0	16800	0	0	21006	0	1	103916	0	0	33054	0	0	5214	0	0	30196	0	TRUE	TRUE	CodingTranscript	SYNONYMOUS	5	synonymous	0.68	0.13
11_75277451_C_G	11	75277451	rs771513145	C	G	E	PASS	NA	p.Ala19Ala	p.Ala19Ala	c.57C>G	synonymous		1	233070	0	0.004291	0	13346	0	0	9538	0	0	16800	0	0	21006	0	1	103916	0	0	33054	0	0	5214	0	0	30196	0	TRUE	TRUE	CodingTranscript	SYNONYMOUS	5	synonymous	0.68	0.13
11_75277451_C_T	11	75277451	rs771513145	C	T	E G	RF	PASS	p.Ala19Ala	p.Ala19Ala	c.57C>T	synonymous		1	30970	0	0.03229	1	8732	0	0	302	0	0	1622	0	0	3492	0	0	15002	0	0	838	0	0	982	0	0	0	0	FALSE	TRUE	CodingTranscript	SYNONYMOUS	5	synonymous	0.68	0.13
11_75277452_G_A	11	75277452	rs200397594	G	A	E G	RF	PASS	p.Glu20Lys	p.Glu20Lys	c.58G>A	missense		1	30968	0	0.03229	0	8732	0	0	302	0	1	1622	0	0	3492	0	0	15000	0	0	838	0	0	982	0	0	0	0	FALSE	TRUE	CodingTranscript	NON_SYNONYMOUS	7	missense	0.68	0.13
11_75277454_G_A	11	75277454	.	G	A	E	PASS	NA	p.Glu20Glu	p.Glu20Glu	c.60G>A	synonymous		1	234542	0	0.004264	0	13568	0	0	9556	0	0	16832	0	0	21156	0	0	104728	0	1	33154	0	0	5234	0	0	30314	0	FALSE	TRUE	CodingTranscript	SYNONYMOUS	5	synonymous	0.67	0.13
11_75277456_T_TGAAGAAACCTGCAGCC	11	75277456	rs776044395	T	TGAAGAAACCTGCAGCC	E	PASS	NA	p.Ala27GlufsTer123	p.Ala27GlufsTer123	c.64_79dupAAGAAACCTGCAGCCG	frameshift		1	233830	0	0.004277	1	13474	0	0	9542	0	0	16848	0	0	20950	0	0	104354	0	0	33142	0	0	5224	0	0	30296	0	NA	TRUE	CodingTranscript	FRAME_SHIFT	7	frameshift,feature_elongation	0.68	0.14
11_75277457_G_A	11	75277457	rs570027359	G	A	E	PASS	NA	p.Val21Val	p.Val21Val	c.63G>A	synonymous		11	234794	0	0.04685	0	13608	0	0	9572	0	0	16866	0	0	21144	0	0	104808	0	0	33202	0	0	5242	0	11	30352	0	FALSE	TRUE	CodingTranscript	SYNONYMOUS	5	synonymous	0.69	0.15
11_75277465_C_G	11	75277465	.	C	G	G	NA	PASS	p.Pro24Arg	p.Pro24Arg	c.71C>G	missense		1	30964	0	3.23e-5	0	8732	0	0	302	0	0	1622	0	0	3490	0	1	14998	0	0	838	0	0	982	0	0	0	0	TRUE	TRUE	CodingTranscript	NON_SYNONYMOUS	7	missense	0.70	0.17
11_75277467_G_A	11	75277467	rs775990446	G	A	E G	PASS	PASS	p.Ala25Thr	p.Ala25Thr	c.73G>A	missense		4	266240	0	0.01502	0	22438	0	0	9874	0	0	18510	0	0	24488	0	3	120262	0	1	34070	0	0	6210	0	0	30388	0	FALSE	TRUE	CodingTranscript	NON_SYNONYMOUS	7	missense	0.71	0.17
11_75277468_C_T	11	75277468	.	C	T	E	PASS	NA	p.Ala25Val	p.Ala25Val	c.74C>T	missense		1	236244	0	0.004233	0	13834	0	0	9604	0	0	16908	0	0	21166	0	1	105818	0	0	33250	0	0	5270	0	0	30394	0	FALSE	TRUE	CodingTranscript	NON_SYNONYMOUS	7	missense	0.70	0.17
11_75277472_C_T	11	75277472	rs763412073	C	T	E G	PASS	PASS	p.Ala26Ala	p.Ala26Ala	c.78C>T	synonymous		14	268400	0	0.05216	0	22728	0	7	9922	0	0	18566	0	0	24822	0	5	121482	0	2	34152	0	0	6294	0	0	30434	0	FALSE	TRUE	CodingTranscript	SYNONYMOUS	5	synonymous	0.72	0.17
11_75277480_C_G	11	75277480	rs774738608	C	G	E	PASS	NA	p.Ala29Gly	p.Ala29Gly	c.86C>G	missense		2	238838	0	0.008374	0	14268	0	0	9666	0	0	17012	0	0	21392	0	0	107324	0	0	33340	0	0	5332	0	2	30504	0	TRUE	TRUE	CodingTranscript	NON_SYNONYMOUS	7	missense	0.69	0.16
11_75277480_C_T	11	75277480	rs774738608	C	T	E	PASS	NA	p.Ala29Val	p.Ala29Val	c.86C>T	missense		6	238838	0	0.02512	0	14268	0	1	9666	0	4	17012	0	0	21392	0	0	107324	0	1	33340	0	0	5332	0	0	30504	0	FALSE	TRUE	CodingTranscript	NON_SYNONYMOUS	7	missense	0.69	0.16
11_75277481_T_A	11	75277481	rs767477512	T	A	E G	PASS	PASS	p.Ala29Ala	p.Ala29Ala	c.87T>A	synonymous		6	269978	0	0.02222	0	23022	0	0	9974	0	0	18640	0	0	24916	0	5	122418	0	0	34176	0	1	6310	0	0	30522	0	TRUE	TRUE	CodingTranscript	SYNONYMOUS	5	synonymous	0.70	0.16
11_75277486_G_C	11	75277486	rs140588417	G	C	E G	PASS	PASS	p.Gly31Ala	p.Gly31Ala	c.92G>C	missense		398	270090	4	0.001474	2	23038	0	325	9984	4	0	18618	0	0	24878	0	43	122576	0	10	34180	0	18	6324	0	0	30492	0	TRUE	TRUE	CodingTranscript	NON_SYNONYMOUS	7	missense	0.68	0.16
11_75277489_C_G	11	75277489	.	C	G	G	NA	PASS	p.Thr32Ser	p.Thr32Ser	c.95C>G	missense		1	30964	0	3.23e-5	0	8724	0	0	302	0	0	1622	0	0	3494	0	1	15002	0	0	838	0	0	982	0	0	0	0	TRUE	TRUE	CodingTranscript	NON_SYNONYMOUS	7	missense	0.70	0.16
11_75277491_G_C	11	75277491	rs150061926	G	C	E G	PASS	PASS	p.Ala33Pro	p.Ala33Pro	c.97G>C	missense		39	270796	0	0.0001440	35	23148	0	0	10000	0	0	18650	0	0	24946	0	0	122994	0	3	34190	0	1	6340	0	0	30528	0	TRUE	TRUE	CodingTranscript	NON_SYNONYMOUS	7	missense	0.70	0.16
11_75277491_G_T	11	75277491	rs150061926	G	T	E	PASS	NA	p.Ala33Ser	p.Ala33Ser	c.97G>T	missense		7	239826	0	0.02919	0	14422	0	0	9698	0	7	17028	0	0	21454	0	0	107986	0	0	33352	0	0	5358	0	0	30528	0	TRUE	TRUE	CodingTranscript	NON_SYNONYMOUS	7	missense	0.70	0.16
11_75277492_C_T	11	75277492	rs754791521	C	T	E	PASS	NA	p.Ala33Val	p.Ala33Val	c.98C>T	missense		7	239738	0	2.92e-5	0	14408	0	0	9696	0	7	17020	0	0	21412	0	0	107978	0	0	33344	0	0	5352	0	0	30528	0	FALSE	TRUE	CodingTranscript	NON_SYNONYMOUS	7	missense	0.70	0.16
11_75277493_G_A	11	75277493	rs767591495	G	A	E	PASS	NA	p.Ala33Ala	p.Ala33Ala	c.99G>A	synonymous		1	240012	0	0.004166	0	14474	0	0	9704	0	0	17026	0	0	21432	0	1	108114	0	0	33356	0	0	5360	0	0	30546	0	FALSE	TRUE	CodingTranscript	SYNONYMOUS	5	synonymous	0.70	0.16
11_75277494_GAGA_G	11	75277494	rs761108630	GAGA	G	E	PASS	NA	p.Lys35del	p.Lys35del	c.103_105delAAG	inframe deletion		1	240140	0	0.004164	0	14482	0	0	9704	0	0	17024	0	0	21444	0	1	108200	0	0	33364	0	0	5366	0	0	30556	0	NA	TRUE	CodingTranscript	INFRAME	7	inframe_deletion	0.69	0.14
11_75277496_G_A	11	75277496	rs555812743	G	A	E	PASS	NA	p.Glu34Glu	p.Glu34Glu	c.102G>A	synonymous		15	240396	0	6.24e-5	0	14512	0	0	9708	0	0	17034	0	0	21488	0	15	108314	0	0	33382	0	0	5378	0	0	30580	0	FALSE	TRUE	CodingTranscript	SYNONYMOUS	5	synonymous	0.70	0.15
11_75277498_A_T	11	75277498	rs752546581	A	T	E	PASS	NA	p.Lys35Met	p.Lys35Met	c.104A>T	missense		2	240640	0	0.008311	2	14540	0	0	9714	0	0	17036	0	0	21496	0	0	108480	0	0	33408	0	0	5390	0	0	30576	0	TRUE	TRUE	CodingTranscript	NON_SYNONYMOUS	7	missense	0.69	0.15
11_75277502_G_A	11	75277502	rs758409911	G	A	E	PASS	NA	p.Leu36Leu	p.Leu36Leu	c.108G>A	synonymous		1	240482	0	0.004158	1	14540	0	0	9716	0	0	17048	0	0	21456	0	0	108382	0	0	33396	0	0	5384	0	0	30560	0	FALSE	TRUE	CodingTranscript	SYNONYMOUS	5	synonymous	0.70	0.15
11_75277511_G_A	11	75277511	rs746583288	G	A	E	PASS	NA	c.43-1G>Aâ€		c.43-1G>A	splice acceptor	LC LoF	1	240850	0	0.004152	1	14616	0	0	9726	0	0	17060	0	0	21534	0	0	108562	0	0	33390	0	0	5378	0	0	30584	0	FALSE	TRUE	CodingTranscript	SYNONYMOUS	5	synonymous	0.70	0.15
11_75277513_C_T	11	75277513	.	C	T	E G	RF	PASS	c.117+2C>Tâ€		c.117+2C>T	splice donor	LC LoF	1	30954	0	0.03231	0	8724	0	0	302	0	0	1622	0	0	3490	0	1	14996	0	0	838	0	0	982	0	0	0	0	FALSE	TRUE	CodingTranscript	NON_SYNONYMOUS	7	missense	0.69	0.15
11_75277517_C_A	11	75277517	rs770639155	C	A	E	PASS	NA	c.117+6C>Aâ€		c.117+6C>A	splice region		1	241056	0	0.004148	0	14660	0	0	9728	0	0	17068	0	0	21560	0	0	108666	0	0	33406	0	0	5376	0	1	30592	0	TRUE	TRUE	CodingTranscript	SYNONYMOUS	5	synonymous	0.68	0.13
11_75277519_C_A	11	75277519	rs781002791	C	A	E	PASS	NA	p.Thr42Lys	p.Thr42Lys	c.125C>A	missense		3	241098	0	0.01244	0	14674	0	0	9730	0	0	17060	0	0	21560	0	0	108710	0	0	33398	0	0	5384	0	3	30582	0	TRUE	TRUE	CodingTranscript	NON_SYNONYMOUS	7	missense	0.66	0.13
11_75277521_C_T	11	75277521	rs768929258	C	T	E	PASS	NA	p.Leu43Phe	p.Leu43Phe	c.127C>T	missense		2	241360	0	0.008286	0	14704	0	0	9728	0	0	17072	0	0	21616	0	0	108834	0	2	33418	0	0	5388	0	0	30600	0	FALSE	TRUE	CodingTranscript	NON_SYNONYMOUS	7	missense	0.67	0.13
11_75277526_C_T	11	75277526	rs145039745	C	T	E	PASS	NA	p.Ala44Ala	p.Ala44Ala	c.132C>T	synonymous		3	241164	0	0.01244	0	14708	0	0	9742	0	1	17070	0	0	21546	0	0	108712	0	0	33400	0	0	5390	0	2	30596	0	FALSE	TRUE	CodingTranscript	SYNONYMOUS	5	synonymous	0.66	0.12
11_75277533_A_G	11	75277533	.	A	G	E	PASS	NA	p.Ser47Gly	p.Ser47Gly	c.139A>G	missense		2	241548	0	8.28e-6	0	14778	0	0	9742	0	0	17076	0	0	21614	0	2	108928	0	0	33412	0	0	5388	0	0	30610	0	FALSE	TRUE	CodingTranscript	NON_SYNONYMOUS	7	missense	0.66	0.12
11_75277538_C_CTTCA	11	75277538	rs769257642	C	CTTCA	E	PASS	NA	p.Gly49PhefsTer97	p.Gly49PhefsTer97	c.144_145insTTCA	frameshift		1	241656	0	0.004138	0	14802	0	1	9742	0	0	17084	0	0	21582	0	0	109012	0	0	33422	0	0	5394	0	0	30618	0	NA	TRUE	CodingTranscript	FRAME_SHIFT	7	frameshift,feature_elongation	0.67	0.12
11_75277539_G_GCTT	11	75277539	rs772717163	G	GCTT	E	PASS	NA	p.Gly49delinsAlaCys	p.Gly49delinsAlaCys	c.145_146insCTT	protein altering		1	241626	0	0.004139	0	14812	0	1	9748	0	0	17088	0	0	21590	0	0	108982	0	0	33414	0	0	5398	0	0	30594	0	NA	TRUE	CodingTranscript	INFRAME	7	inframe_insertion	0.67	0.12
11_75277540_G_GTA	11	75277540	rs762536861	G	GTA	E	PASS	NA	p.Leu50ThrfsTer30	p.Leu50ThrfsTer30	c.146_147insTA	frameshift		1	241736	0	0.004137	0	14830	0	1	9756	0	0	17082	0	0	21558	0	0	109066	0	0	33424	0	0	5400	0	0	30620	0	NA	TRUE	CodingTranscript	FRAME_SHIFT	7	frameshift,feature_elongation	0.67	0.12
11_75277540_G_T	11	75277540	rs762536861	G	T	G	NA	PASS	p.Gly49Val	p.Gly49Val	c.146G>T	missense		1	30954	0	0.03231	0	8722	0	0	302	0	0	1622	0	0	3492	0	1	14998	0	0	838	0	0	980	0	0	0	0	TRUE	TRUE	CodingTranscript	NON_SYNONYMOUS	7	missense	0.67	0.12
11_75277543_T_A	11	75277543	rs772706450	T	A	E	PASS	NA	p.Leu50Gln	p.Leu50Gln	c.149T>A	missense		1	241986	0	0.004132	0	14856	0	1	9750	0	0	17088	0	0	21642	0	0	109194	0	0	33434	0	0	5400	0	0	30622	0	TRUE	TRUE	CodingTranscript	NON_SYNONYMOUS	7	missense	0.68	0.12
11_75277552_G_A	11	75277552	rs773211240	G	A	E	PASS	NA	p.Ser53Asn	p.Ser53Asn	c.158G>A	missense		1	241898	0	0.004134	0	14928	0	0	9764	0	0	17104	0	0	21584	0	1	109086	0	0	33414	0	0	5402	0	0	30616	0	FALSE	TRUE	CodingTranscript	NON_SYNONYMOUS	7	missense	0.67	0.13
11_75277554_T_C	11	75277554	rs540061657	T	C	E	PASS	NA	p.Leu54Leu	p.Leu54Leu	c.160T>C	synonymous		7	242026	0	0.02892	0	14942	0	0	9770	0	7	17106	0	0	21626	0	0	109136	0	0	33418	0	0	5406	0	0	30622	0	FALSE	TRUE	CodingTranscript	SYNONYMOUS	5	synonymous	0.67	0.13
11_75277556_G_T	11	75277556	.	G	T	E	PASS	NA	p.Leu54Phe	p.Leu54Phe	c.162G>T	missense		1	241902	0	0.004134	0	14934	0	0	9768	0	0	17110	0	0	21578	0	1	109062	0	0	33424	0	0	5404	0	0	30622	0	TRUE	TRUE	CodingTranscript	NON_SYNONYMOUS	7	missense	0.67	0.13
11_75277561_A_G	11	75277561	rs553519612	A	G	E G	PASS	PASS	p.Gln56Arg	p.Gln56Arg	c.167A>G	missense		13	272916	0	0.04763	0	23662	0	0	10064	0	13	18736	0	0	25102	0	0	124082	0	0	34272	0	0	6388	0	0	30610	0	FALSE	TRUE	CodingTranscript	NON_SYNONYMOUS	7	missense	0.67	0.15
11_75277562_G_A	11	75277562	rs754091752	G	A	E	PASS	NA	p.Gln56Gln	p.Gln56Gln	c.168G>A	synonymous		3	241828	0	0.01241	2	14930	0	0	9770	0	0	17114	0	0	21554	0	0	108998	0	1	33434	0	0	5410	0	0	30618	0	FALSE	TRUE	CodingTranscript	SYNONYMOUS	5	synonymous	0.67	0.15
11_75277565_C_T	11	75277565	rs759842764	C	T	E	PASS	NA	p.Ala57Ala	p.Ala57Ala	c.171C>T	synonymous		1	241906	0	0.004134	0	14956	0	0	9768	0	0	17112	0	0	21578	0	0	109024	0	0	33434	0	0	5410	0	1	30624	0	FALSE	TRUE	CodingTranscript	SYNONYMOUS	5	synonymous	0.67	0.16
11_75277567_T_C	11	75277567	rs764918894	T	C	E	PASS	NA	p.Met58Thr	p.Met58Thr	c.173T>C	missense		2	241948	0	0.008266	0	14948	0	0	9766	0	0	17110	0	0	21594	0	0	109060	0	2	33430	0	0	5412	0	0	30628	0	FALSE	TRUE	CodingTranscript	NON_SYNONYMOUS	7	missense	0.67	0.16
11_75277572_A_G	11	75277572	rs752594307	A	G	E	PASS	NA	p.Lys60Glu	p.Lys60Glu	c.178A>G	missense		2	241944	0	0.008266	0	14976	0	0	9780	0	0	17112	0	0	21564	0	2	109014	0	0	33450	0	0	5416	0	0	30632	0	FALSE	TRUE	CodingTranscript	NON_SYNONYMOUS	7	missense	0.68	0.16
11_75277581_G_A	11	75277581	rs758261919	G	A	E	PASS	NA	p.Ala63Thr	p.Ala63Thr	c.187G>A	missense		1	241606	0	0.004139	0	14960	0	0	9782	0	0	17118	0	0	21476	0	1	108798	0	0	33430	0	0	5420	0	0	30622	0	FALSE	TRUE	CodingTranscript	NON_SYNONYMOUS	7	missense	0.69	0.17
11_75277582_C_T	11	75277582	rs576480194	C	T	E G	PASS	PASS	p.Ala63Val	p.Ala63Val	c.188C>T	missense		109	272336	1	0.0004002	0	23666	0	0	10080	0	95	18728	1	0	24886	0	1	123702	0	0	34258	0	1	6396	0	12	30620	0	FALSE	TRUE	CodingTranscript	NON_SYNONYMOUS	7	missense	0.69	0.17
11_75277583_A_C	11	75277583	rs751053910	A	C	E	PASS	NA	p.Ala63Ala	p.Ala63Ala	c.189A>C	synonymous		1	241546	0	4.14e-6	0	14966	0	0	9784	0	0	17108	0	0	21454	0	0	108768	0	0	33424	0	0	5420	0	1	30622	0	TRUE	TRUE	CodingTranscript	SYNONYMOUS	5	synonymous	0.69	0.17
11_75277585_T_C	11	75277585	.	T	C	E	PASS	NA	p.Val64Ala	p.Val64Ala	c.191T>C	missense		1	241546	0	4.14e-6	0	14962	0	0	9782	0	1	17106	0	0	21458	0	0	108772	0	0	33428	0	0	5420	0	0	30618	0	FALSE	TRUE	CodingTranscript	NON_SYNONYMOUS	7	missense	0.69	0.17
11_75277585_TGGA_T	11	75277585	.	TGGA	T	E	PASS	NA	p.Glu65del	p.Glu65del	c.193_195delGAG	inframe deletion		1	241546	0	4.14e-6	0	14962	0	0	9782	0	0	17106	0	0	21458	0	0	108772	0	0	33428	0	0	5420	0	1	30618	0	NA	TRUE	CodingTranscript	INFRAME	7	inframe_deletion	0.69	0.18
11_75277586_G_A	11	75277586	rs756847184	G	A	E	PASS	NA	p.Val64Val	p.Val64Val	c.192G>A	synonymous		5	241488	0	2.07e-5	0	14960	0	0	9780	0	0	17102	0	0	21436	0	0	108756	0	0	33430	0	0	5412	0	5	30612	0	FALSE	TRUE	CodingTranscript	SYNONYMOUS	5	synonymous	0.70	0.19
11_75277593_A_G	11	75277593	rs780947787	A	G	E	PASS	NA	p.Ile67Val	p.Ile67Val	c.199A>G	missense		1	241306	0	0.004144	0	14946	0	0	9794	0	0	17104	0	0	21362	0	1	108652	0	0	33412	0	0	5416	0	0	30620	0	FALSE	TRUE	CodingTranscript	NON_SYNONYMOUS	7	missense	0.69	0.20
11_75277599_G_C	11	75277599	rs755858302	G	C	E	PASS	NA	p.Val69Leu	p.Val69Leu	c.205G>C	missense		1	240594	0	0.004156	1	14918	0	0	9778	0	0	17074	0	0	21094	0	0	108334	0	0	33392	0	0	5410	0	0	30594	0	TRUE	TRUE	CodingTranscript	NON_SYNONYMOUS	7	missense	0.70	0.19
11_75277602_T_C	11	75277602	.	T	C	E	PASS	NA	p.Ser70Pro	p.Ser70Pro	c.208T>C	missense		1	240516	0	0.004158	0	14906	0	0	9774	0	0	17084	0	0	21080	0	0	108292	0	0	33390	0	0	5408	0	1	30582	0	FALSE	TRUE	CodingTranscript	NON_SYNONYMOUS	7	missense	0.69	0.17
11_75277605_C_G	11	75277605	rs779144412	C	G	E	PASS	NA	p.Pro71Ala	p.Pro71Ala	c.211C>G	missense		2	240206	0	0.008326	0	14884	0	0	9766	0	0	17076	0	0	20936	0	2	108184	0	0	33378	0	0	5410	0	0	30572	0	TRUE	TRUE	CodingTranscript	NON_SYNONYMOUS	7	missense	0.69	0.17
11_75277607_C_T	11	75277607	rs748554062	C	T	E	PASS	NA	p.Pro71Pro	p.Pro71Pro	c.213C>T	synonymous		2	240068	0	0.008331	1	14874	0	0	9758	0	0	17068	0	0	20872	0	1	108160	0	0	33372	0	0	5404	0	0	30560	0	FALSE	TRUE	CodingTranscript	SYNONYMOUS	5	synonymous	0.68	0.16
11_75277613_G_A	11	75277613	rs546032466	G	A	E G	PASS	PASS	p.Val73Val	p.Val73Val	c.219G>A	synonymous		4	270604	0	0.01478	0	23558	0	0	10066	0	4	18680	0	0	24152	0	0	123020	0	0	34206	0	0	6380	0	0	30542	0	FALSE	TRUE	CodingTranscript	SYNONYMOUS	5	synonymous	0.68	0.15
11_75277616_G_C	11	75277616	rs747053791	G	C	E	PASS	NA	p.Val74Val	p.Val74Val	c.222G>C	synonymous		2	239276	0	0.008359	0	14838	0	0	9752	0	2	17044	0	0	20488	0	0	107874	0	0	33376	0	0	5394	0	0	30510	0	TRUE	TRUE	CodingTranscript	SYNONYMOUS	5	synonymous	0.68	0.15
11_75277621_C_G	11	75277621	rs376824871	C	G	E	PASS	NA	p.Ser76Trp	p.Ser76Trp	c.227C>G	missense		3	238684	0	0.01257	0	14770	0	0	9734	0	0	17028	0	0	20314	0	3	107632	0	0	33346	0	0	5380	0	0	30480	0	TRUE	TRUE	CodingTranscript	NON_SYNONYMOUS	7	missense	0.67	0.16
11_75277621_C_T	11	75277621	rs376824871	C	T	E G	PASS	PASS	p.Ser76Leu	p.Ser76Leu	c.227C>T	missense		37	269636	0	0.0001372	3	23484	0	0	10036	0	0	18648	0	0	23806	0	3	122636	0	25	34184	0	2	6362	0	4	30480	0	FALSE	TRUE	CodingTranscript	NON_SYNONYMOUS	7	missense	0.67	0.16
11_75277628_A_G	11	75277628	rs584961	A	G	E G	PASS	PASS	p.Leu78Leu	p.Leu78Leu	c.234A>G	synonymous		242451	269086	109683	0.9010	22339	23434	10655	9256	10048	4270	12941	18526	4522	22062	23738	10242	109647	122274	49139	31988	34196	14957	5728	6358	2585	28490	30512	13313	FALSE	FALSE	CodingTranscript	SYNONYMOUS	5	synonymous	0.68	0.17
11_75277631_G_A	11	75277631	rs146831880	G	A	E G	PASS	PASS	p.Gly79Gly	p.Gly79Gly	c.237G>A	synonymous		18	268228	0	0.06711	2	23318	0	0	10016	0	0	18600	0	0	23284	0	16	122018	0	0	34170	0	0	6332	0	0	30490	0	FALSE	TRUE	CodingTranscript	SYNONYMOUS	5	synonymous	0.69	0.19
11_75277631_G_C	11	75277631	rs146831880	G	C	E	PASS	NA	p.Gly79Gly	p.Gly79Gly	c.237G>C	synonymous		1	237282	0	0.004214	0	14608	0	0	9714	0	1	16978	0	0	19790	0	0	107018	0	0	33332	0	0	5352	0	0	30490	0	TRUE	TRUE	CodingTranscript	SYNONYMOUS	5	synonymous	0.69	0.19
11_75277634_C_T	11	75277634	rs367576479	C	T	E G	PASS	PASS	p.Leu80Leu	p.Leu80Leu	c.240C>T	synonymous		10	268132	0	3.73e-5	0	23318	0	0	10010	0	1	18588	0	0	23270	0	8	121952	0	0	34180	0	1	6336	0	0	30478	0	FALSE	TRUE	CodingTranscript	SYNONYMOUS	5	synonymous	0.70	0.20
11_75277635_G_C	11	75277635	.	G	C	G	NA	PASS	p.Val81Leu	p.Val81Leu	c.241G>C	missense		3	30936	0	0.09697	0	8706	0	0	300	0	0	1622	0	0	3492	0	3	14996	0	0	838	0	0	982	0	0	0	0	TRUE	TRUE	CodingTranscript	NON_SYNONYMOUS	7	missense	0.70	0.20
11_75277638_T_G	11	75277638	rs751575798	T	G	E	PASS	NA	p.Ser82Ala	p.Ser82Ala	c.244T>G	missense		1	236520	0	0.004228	0	14550	0	0	9684	0	0	16950	0	0	19596	0	0	106640	0	1	33332	0	0	5336	0	0	30432	0	TRUE	TRUE	CodingTranscript	NON_SYNONYMOUS	7	missense	0.70	0.20
11_75277658_C_T	11	75277658	rs374032433	C	T	E	PASS	NA	p.Thr88Thr	p.Thr88Thr	c.264C>T	synonymous		1	234030	0	0.004273	0	14346	0	0	9628	0	0	16832	0	0	19176	0	1	105340	0	0	33156	0	0	5272	0	0	30280	0	FALSE	TRUE	CodingTranscript	SYNONYMOUS	5	synonymous	0.71	0.24
11_75277659_A_AC	11	75277659	.	A	AC	E	PASS	NA	p.Ala90GlyfsTer55	p.Ala90GlyfsTer55	c.266dupC	frameshift		1	234126	0	0.004271	0	14340	0	0	9630	0	0	16852	0	0	19238	0	1	105330	0	0	33154	0	0	5282	0	0	30300	0	NA	TRUE	CodingTranscript	FRAME_SHIFT	7	frameshift,feature_elongation	0.71	0.24
11_75277661_G_A	11	75277661	rs139127426	G	A	E G	PASS	PASS	p.Thr89Thr	p.Thr89Thr	c.267G>A	synonymous		557	264568	2	0.002105	6	22998	0	15	9902	0	0	18448	0	6	22712	0	333	120020	2	12	33966	0	18	6258	0	167	30264	0	FALSE	TRUE	CodingTranscript	SYNONYMOUS	5	synonymous	0.72	0.24
11_75277666_C_T	11	75277666	rs750020039	C	T	E	PASS	NA	p.Ser91Leu	p.Ser91Leu	c.272C>T	missense		7	233902	0	0.02993	0	14304	0	0	9594	0	0	16828	0	0	19448	0	7	105042	0	0	33116	0	0	5278	0	0	30292	0	FALSE	TRUE	CodingTranscript	NON_SYNONYMOUS	7	missense	0.72	0.25
11_75277687_G_A	11	75277687	rs541595707	G	A	E G	PASS	PASS	p.Ser98Asn	p.Ser98Asn	c.293G>A	missense		57	262660	0	0.0002170	0	22810	0	0	9820	0	0	18338	0	0	23304	0	0	118268	0	0	33756	0	1	6206	0	56	30158	0	FALSE	TRUE	CodingTranscript	NON_SYNONYMOUS	7	missense	0.72	0.25
11_75277691_C_G	11	75277691	rs758825132	C	G	E	PASS	NA	p.Ala99Ala	p.Ala99Ala	c.297C>G	synonymous		1	230836	0	0.004332	0	14014	0	0	9500	0	0	16684	0	0	19940	0	0	102576	0	0	32836	0	0	5206	0	1	30080	0	TRUE	TRUE	CodingTranscript	SYNONYMOUS	5	synonymous	0.74	0.28
11_75277691_C_T	11	75277691	rs758825132	C	T	E	PASS	NA	p.Ala99Ala	p.Ala99Ala	c.297C>T	synonymous		3	230836	0	1.3e-5	0	14014	0	0	9500	0	2	16684	0	0	19940	0	0	102576	0	0	32836	0	0	5206	0	1	30080	0	FALSE	TRUE	CodingTranscript	SYNONYMOUS	5	synonymous	0.74	0.28
11_75277692_G_A	11	75277692	rs749665611	G	A	E G	PASS	PASS	p.Glu100Lys	p.Glu100Lys	c.298G>A	missense		33	262122	0	0.0001259	0	22732	0	0	9804	0	0	18300	0	1	23568	0	20	117776	0	11	33652	0	1	6198	0	0	30092	0	FALSE	TRUE	CodingTranscript	NON_SYNONYMOUS	7	missense	0.73	0.28
11_75277694_G_C	11	75277694	.	G	C	G	NA	PASS	p.Glu100Asp	p.Glu100Asp	c.300G>C	missense		1	30930	0	0.03233	0	8708	0	0	302	0	0	1620	0	1	3494	0	0	14986	0	0	838	0	0	982	0	0	0	0	TRUE	TRUE	CodingTranscript	NON_SYNONYMOUS	7	missense	0.72	0.28
11_75277698_C_CTGCGCGACGAGGAGG	11	75277698	.	C	CTGCGCGACGAGGAGG	E	PASS	NA	p.Arg103_Val107dup	p.Arg103_Val107dup	c.308_322dupGCGACGAGGAGGTGC	inframe insertion		1	229998	0	0.004348	0	13846	0	0	9506	0	0	16574	0	0	20178	0	0	101970	0	0	32680	0	0	5204	0	1	30040	0	NA	TRUE	CodingTranscript	INFRAME	7	inframe_insertion	0.72	0.28
11_75277699_T_A	11	75277699	rs377583721	T	A	E	PASS	NA	p.Leu102Gln	p.Leu102Gln	c.305T>A	missense		5	230106	0	0.02173	0	13848	0	0	9502	0	0	16602	0	0	20204	0	5	102014	0	0	32698	0	0	5202	0	0	30036	0	TRUE	TRUE	CodingTranscript	NON_SYNONYMOUS	7	missense	0.72	0.28
11_75277701_C_T	11	75277701	rs369290752	C	T	E G	RF|AC0	PASS	p.Arg103Cys	p.Arg103Cys	c.307C>T	missense		1	30922	0	0.03234	1	8706	0	0	302	0	0	1622	0	0	3490	0	0	14984	0	0	836	0	0	982	0	0	0	0	FALSE	TRUE	CodingTranscript	NON_SYNONYMOUS	7	missense	0.72	0.26
11_75277703_C_T	11	75277703	rs757737859	C	T	E G	PASS	PASS	p.Arg103Arg	p.Arg103Arg	c.309C>T	synonymous		4	259894	0	0.01539	0	22418	0	0	9790	0	0	18102	0	0	23684	0	4	116320	0	0	33438	0	0	6154	0	0	29988	0	FALSE	TRUE	CodingTranscript	SYNONYMOUS	5	synonymous	0.72	0.26
11_75277706_C_CGAGGAGGTG	11	75277706	rs766009390	C	CGAGGAGGTG	E	PASS	NA	p.Glu105_Val107dup	p.Glu105_Val107dup	c.313_321dupGAGGAGGTG	inframe insertion		1	229118	0	0.004365	0	13662	0	0	9486	0	0	16486	0	0	20368	0	0	101320	0	0	32598	0	0	5182	0	1	30016	0	NA	TRUE	CodingTranscript	INFRAME	7	inframe_insertion	0.72	0.26
11_75277713_G_A	11	75277713	rs745963767	G	A	E	PASS	NA	p.Val107Met	p.Val107Met	c.319G>A	missense		12	229582	1	0.05227	0	13648	0	0	9494	0	0	16484	0	0	20648	0	0	101504	0	0	32590	0	0	5190	0	12	30024	1	FALSE	TRUE	CodingTranscript	NON_SYNONYMOUS	7	missense	0.72	0.25
11_75277718_C_T	11	75277718	.	C	T	E	PASS	NA	p.His108His	p.His108His	c.324C>T	synonymous		1	229718	0	0.004353	0	13650	0	0	9482	0	0	16484	0	0	20812	0	1	101506	0	0	32566	0	0	5190	0	0	30028	0	FALSE	TRUE	CodingTranscript	SYNONYMOUS	5	synonymous	0.72	0.25
11_75277720_C_G	11	75277720	rs148959638	C	G	E G	PASS	PASS	p.Ala109Gly	p.Ala109Gly	c.326C>G	missense		8	260592	0	3.07e-5	7	22342	0	0	9776	0	1	18078	0	0	24394	0	0	116366	0	0	33398	0	0	6164	0	0	30074	0	TRUE	TRUE	CodingTranscript	NON_SYNONYMOUS	7	missense	0.72	0.25
11_75277730_C_A	11	75277730	rs775801195	C	A	E	PASS	NA	p.Gly112Gly	p.Gly112Gly	c.336C>A	synonymous		3	230710	0	1.3e-5	0	13650	0	0	9490	0	0	16536	0	0	21160	0	0	101878	0	3	32660	0	0	5216	0	0	30120	0	TRUE	TRUE	CodingTranscript	SYNONYMOUS	5	synonymous	0.71	0.24
11_75277730_C_T	11	75277730	rs775801195	C	T	E G	PASS	PASS	p.Gly112Gly	p.Gly112Gly	c.336C>T	synonymous		8	261648	0	0.03058	0	22362	0	0	9792	0	0	18158	0	1	24654	0	5	116868	0	0	33496	0	2	6198	0	0	30120	0	FALSE	TRUE	CodingTranscript	SYNONYMOUS	5	synonymous	0.71	0.24
11_75277731_GAGC_G	11	75277731	.	GAGC	G	E	PASS	NA	p.Glu113_Leu114delin...	p.Glu113_Leu114delinsVal	c.338_340delAGC	inframe deletion		1	231702	0	0.004316	0	13798	0	0	9508	0	0	16590	0	0	21310	0	0	102376	0	1	32704	0	0	5228	0	0	30188	0	NA	TRUE	CodingTranscript	INFRAME	7	inframe_deletion	0.70	0.23
11_75277733_G_C	11	75277733	rs763945752	G	C	E	PASS	NA	p.Glu113Asp	p.Glu113Asp	c.339G>C	missense		1	232494	0	0.004301	0	13858	0	0	9516	0	0	16650	0	0	21388	0	1	102834	0	0	32774	0	0	5244	0	0	30230	0	TRUE	TRUE	CodingTranscript	NON_SYNONYMOUS	7	missense	0.71	0.24
11_75277736_G_A	11	75277736	rs774334034	G	A	E	PASS	NA	p.Leu114Leu	p.Leu114Leu	c.342G>A	synonymous		2	233454	0	0.008567	0	13930	0	0	9524	0	2	16704	0	0	21502	0	0	103364	0	0	32866	0	0	5270	0	0	30294	0	FALSE	TRUE	CodingTranscript	SYNONYMOUS	5	synonymous	0.70	0.23
11_75277737_C_T	11	75277737	rs761840921	C	T	E	PASS	NA	p.Leu115Leu	p.Leu115Leu	c.343C>T	synonymous		1	233652	0	4.28e-6	0	13950	0	0	9542	0	0	16720	0	0	21490	0	1	103522	0	0	32880	0	0	5274	0	0	30274	0	FALSE	TRUE	CodingTranscript	SYNONYMOUS	5	synonymous	0.70	0.23
11_75277738_T_A	11	75277738	.	T	A	E	PASS	NA	p.Leu115Gln	p.Leu115Gln	c.344T>A	missense		2	234184	0	8.54e-6	1	14010	0	0	9544	0	0	16760	0	0	21566	0	0	103772	0	1	32922	0	0	5290	0	0	30320	0	TRUE	TRUE	CodingTranscript	NON_SYNONYMOUS	7	missense	0.70	0.23
11_75277740_C_A	11	75277740	rs200265134	C	A	E G	PASS	PASS	p.Arg116Ser	p.Arg116Ser	c.346C>A	missense		67	265040	0	0.0002528	0	22696	0	0	9842	0	0	18402	0	31	25020	0	29	118700	0	0	33780	0	7	6270	0	0	30330	0	TRUE	TRUE	CodingTranscript	NON_SYNONYMOUS	7	missense	0.69	0.21
11_75277740_C_T	11	75277740	rs200265134	C	T	E G	RF	PASS	p.Arg116Cys	p.Arg116Cys	c.346C>T	missense		1	30942	0	0.03232	0	8714	0	0	302	0	0	1622	0	0	3494	0	1	14990	0	0	838	0	0	982	0	0	0	0	FALSE	TRUE	CodingTranscript	NON_SYNONYMOUS	7	missense	0.69	0.21
11_75277741_GC_G	11	75277741	rs755675475	GC	G	E	PASS	NA	p.Ser117HisfsTer10	p.Ser117HisfsTer10	c.348delC	frameshift		1	234702	0	0.004261	0	14064	0	0	9564	0	0	16802	0	0	21568	0	0	104058	0	1	32990	0	0	5304	0	0	30352	0	NA	TRUE	CodingTranscript	FRAME_SHIFT	7	frameshift,feature_truncation	0.70	0.21
11_75277742_C_G	11	75277742	.	C	G	E	PASS	NA	p.Arg116Arg	p.Arg116Arg	c.348C>G	synonymous		1	235650	0	0.004244	0	14162	0	0	9576	0	0	16854	0	0	21654	0	0	104608	0	0	33060	0	0	5320	0	1	30416	0	TRUE	TRUE	CodingTranscript	SYNONYMOUS	5	synonymous	0.70	0.20
11_75277744_C_G	11	75277744	rs571009837	C	G	E	PASS	NA	p.Ser117Ter	p.Ser117Ter	c.350C>G	stop gained		2	236270	0	0.008465	0	14250	0	0	9604	0	0	16864	0	0	21722	0	0	104956	0	1	33102	0	0	5324	0	1	30448	0	TRUE	TRUE	CodingTranscript	STOP_GAINED	8	stop_gained	0.68	0.20
11_75277744_C_T	11	75277744	rs571009837	C	T	E G	PASS	PASS	p.Ser117Leu	p.Ser117Leu	c.350C>T	missense		3	267222	0	0.01123	3	22970	0	0	9906	0	0	18486	0	0	25216	0	0	119950	0	0	33940	0	0	6306	0	0	30448	0	FALSE	TRUE	CodingTranscript	NON_SYNONYMOUS	7	missense	0.68	0.20
11_75277747_T_C	11	75277747	rs751248991	T	C	E	PASS	NA	p.Leu118Pro	p.Leu118Pro	c.353T>C	missense		1	237264	0	0.004215	0	14310	0	0	9626	0	0	16964	0	0	21802	0	0	105570	0	1	33188	0	0	5344	0	0	30460	0	FALSE	TRUE	CodingTranscript	NON_SYNONYMOUS	7	missense	0.69	0.21
11_75277747_T_TCAG	11	75277747	rs751248991	T	TCAG	E	PASS	NA	p.Ser119dup	p.Ser119dup	c.356_358dupGCA	inframe insertion		2	237264	0	0.008429	0	14310	0	0	9626	0	0	16964	0	0	21802	0	2	105570	0	0	33188	0	0	5344	0	0	30460	0	NA	TRUE	CodingTranscript	INFRAME	7	inframe_insertion	0.68	0.21
11_75277748_C_T	11	75277748	.	C	T	G	NA	PASS	p.Leu118Leu	p.Leu118Leu	c.354C>T	synonymous		1	30954	0	0.03231	1	8724	0	0	300	0	0	1622	0	0	3494	0	0	14994	0	0	838	0	0	982	0	0	0	0	FALSE	TRUE	CodingTranscript	SYNONYMOUS	5	synonymous	0.68	0.21
11_75277749_A_AC	11	75277749	rs751987057	A	AC	E	PASS	NA	p.Ser119ThrfsTer26	p.Ser119ThrfsTer26	c.355_356insC	frameshift		1	237726	0	0.004207	0	14388	0	0	9636	0	0	16968	0	0	21840	0	0	105862	0	1	33198	0	0	5338	0	0	30496	0	NA	TRUE	CodingTranscript	FRAME_SHIFT	7	frameshift,feature_elongation	0.68	0.21
11_75277751_C_CACGTG	11	75277751	.	C	CACGTG	E	PASS	NA	p.Asn120ThrfsTer2	p.Asn120ThrfsTer2	c.358_359insCGTGA	frameshift		1	237900	0	0.004203	0	14372	0	0	9634	0	0	16968	0	0	21874	0	0	105944	0	1	33242	0	0	5364	0	0	30502	0	NA	TRUE	CodingTranscript	FRAME_SHIFT	7	frameshift,feature_elongation	0.68	0.21
11_75277752_AACTCC_A	11	75277752	.	AACTCC	A	E	PASS	NA	p.Ser121GlyfsTer22	p.Ser121GlyfsTer22	c.361_365delTCCAC	frameshift		1	238430	0	0.004194	0	14432	0	0	9660	0	0	17004	0	0	21934	0	0	106230	0	0	33266	0	0	5366	0	1	30538	0	NA	TRUE	CodingTranscript	FRAME_SHIFT	7	frameshift,feature_truncation	0.67	0.21
11_75277753_A_G	11	75277753	rs757694413	A	G	E G	PASS	PASS	p.Asn120Ser	p.Asn120Ser	c.359A>G	missense		12	269478	0	0.04453	0	23172	0	0	9962	0	0	18630	0	0	25436	0	0	121268	0	12	34118	0	0	6342	0	0	30550	0	FALSE	TRUE	CodingTranscript	NON_SYNONYMOUS	7	missense	0.68	0.21
11_75277755_T_G	11	75277755	rs781727997	T	G	E	PASS	NA	p.Ser121Ala	p.Ser121Ala	c.361T>G	missense		3	238990	0	0.01255	0	14494	0	0	9662	0	0	17036	0	0	21990	0	0	106548	0	0	33332	0	0	5368	0	3	30560	0	TRUE	TRUE	CodingTranscript	NON_SYNONYMOUS	7	missense	0.68	0.21
11_75277757_C_G	11	75277757	rs650241	C	G	E G	PASS	PASS	p.Ser121Ser	p.Ser121Ser	c.363C>G	synonymous		93315	268384	16873	0.3477	10156	23148	2222	2986	9978	470	3494	18544	329	9453	25318	1756	37835	120598	5862	12726	33916	2362	2214	6348	381	14451	30534	3491	TRUE	TRUE	CodingTranscript	SYNONYMOUS	5	synonymous	0.68	0.21
11_75277760_G_C	11	75277760	rs780034600	G	C	E	PASS	NA	p.Thr122Thr	p.Thr122Thr	c.366G>C	synonymous		101	239396	1	0.0004219	0	14572	0	21	9706	0	0	17048	0	0	22034	0	9	106692	0	6	33374	0	6	5372	0	59	30598	1	TRUE	TRUE	CodingTranscript	SYNONYMOUS	5	synonymous	0.68	0.23
11_75277761_G_T	11	75277761	rs749500041	G	T	E	PASS	NA	p.Ala123Ser	p.Ala123Ser	c.367G>T	missense		4	239722	0	0.01669	0	14612	0	0	9702	0	0	17082	0	0	22060	0	4	106866	0	0	33402	0	0	5380	0	0	30618	0	TRUE	TRUE	CodingTranscript	NON_SYNONYMOUS	7	missense	0.68	0.23
11_75277765_G_C	11	75277765	rs761716222	G	C	E	PASS	NA	p.Arg124Pro	p.Arg124Pro	c.371G>C	missense		1	240498	0	0.004158	0	14700	0	0	9728	0	1	17102	0	0	22126	0	0	107394	0	0	33420	0	0	5400	0	0	30628	0	TRUE	TRUE	CodingTranscript	NON_SYNONYMOUS	7	missense	0.68	0.23
11_75277765_G_T	11	75277765	rs761716222	G	T	E	PASS	NA	p.Arg124Leu	p.Arg124Leu	c.371G>T	missense		1	240498	0	0.004158	0	14700	0	0	9728	0	0	17102	0	0	22126	0	1	107394	0	0	33420	0	0	5400	0	0	30628	0	TRUE	TRUE	CodingTranscript	NON_SYNONYMOUS	7	missense	0.68	0.23
11_75277769_C_G	11	75277769	rs772088561	C	G	E	PASS	NA	p.Asn125Lys	p.Asn125Lys	c.375C>G	missense		1	241234	0	0.004145	0	14830	0	0	9736	0	0	17110	0	0	22182	0	1	107802	0	0	33480	0	0	5418	0	0	30676	0	TRUE	TRUE	CodingTranscript	NON_SYNONYMOUS	7	missense	0.68	0.21
11_75277769_C_T	11	75277769	rs772088561	C	T	E	PASS	NA	p.Asn125Asn	p.Asn125Asn	c.375C>T	synonymous		4	241234	0	0.01658	0	14830	0	0	9736	0	0	17110	0	0	22182	0	3	107802	0	0	33480	0	0	5418	0	1	30676	0	FALSE	TRUE	CodingTranscript	SYNONYMOUS	5	synonymous	0.68	0.21
11_75277782_C_T	11	75277782	rs773234850	C	T	E	PASS	NA	p.Leu130Leu	p.Leu130Leu	c.388C>T	synonymous		3	242132	0	0.01239	0	14930	0	0	9772	0	0	17150	0	0	22226	0	3	108382	0	0	33520	0	0	5428	0	0	30724	0	FALSE	TRUE	CodingTranscript	SYNONYMOUS	5	synonymous	0.65	0.17
11_75277787_C_T	11	75277787	rs760571465	C	T	E	PASS	NA	p.Gly131Gly	p.Gly131Gly	c.393C>T	synonymous		2	242440	0	0.008249	2	14974	0	0	9778	0	0	17160	0	0	22240	0	0	108596	0	0	33528	0	0	5444	0	0	30720	0	FALSE	TRUE	CodingTranscript	SYNONYMOUS	5	synonymous	0.65	0.17
11_75277791_C_T	11	75277791	rs753347871	C	T	E	PASS	NA	p.Arg133Ter	p.Arg133Ter	c.397C>T	stop gained		1	242634	0	0.004121	0	14994	0	0	9786	0	0	17166	0	0	22258	0	1	108736	0	0	33530	0	0	5446	0	0	30718	0	FALSE	TRUE	CodingTranscript	STOP_GAINED	8	stop_gained	0.65	0.19
11_75277794_C_T	11	75277794	.	C	T	E	PASS	NA	p.Leu134Leu	p.Leu134Leu	c.400C>T	synonymous		1	242890	0	0.004117	0	15058	0	0	9790	0	0	17170	0	0	22258	0	0	108892	0	1	33532	0	0	5454	0	0	30736	0	FALSE	TRUE	CodingTranscript	SYNONYMOUS	5	synonymous	0.64	0.17
11_75277795_T_C	11	75277795	.	T	C	E	PASS	NA	p.Leu134Pro	p.Leu134Pro	c.401T>C	missense		1	242970	0	0.004116	0	15070	0	0	9792	0	0	17174	0	0	22260	0	0	108956	0	1	33530	0	0	5456	0	0	30732	0	FALSE	TRUE	CodingTranscript	NON_SYNONYMOUS	7	missense	0.64	0.17
11_75277796_G_C	11	75277796	.	G	C	E	PASS	NA	p.Leu134Leu	p.Leu134Leu	c.402G>C	synonymous		1	242956	0	0.004116	0	15060	0	0	9792	0	0	17174	0	0	22266	0	0	108948	0	0	33524	0	0	5456	0	1	30736	0	TRUE	TRUE	CodingTranscript	SYNONYMOUS	5	synonymous	0.64	0.17
11_75277800_G_C	11	75277800	rs759183941	G	C	E	PASS	NA	p.Gly136Arg	p.Gly136Arg	c.406G>C	missense		2	242980	0	0.008231	0	15056	0	0	9794	0	1	17176	0	0	22254	0	0	108970	0	1	33532	0	0	5458	0	0	30740	0	TRUE	TRUE	CodingTranscript	NON_SYNONYMOUS	7	missense	0.62	0.16
11_75277803_C_G	11	75277803	rs764873239	C	G	E G	PASS	PASS	p.Pro137Ala	p.Pro137Ala	c.409C>G	missense		5	274076	0	0.01824	5	23798	0	0	10098	0	0	18796	0	0	25758	0	0	124062	0	0	34376	0	0	6446	0	0	30742	0	TRUE	TRUE	CodingTranscript	NON_SYNONYMOUS	7	missense	0.62	0.16
11_75277808_C_A	11	75277808	rs751862278	C	A	E	PASS	NA	p.Ser138Arg	p.Ser138Arg	c.414C>A	missense		1	243112	0	0.004113	0	15074	0	0	9796	0	0	17176	0	0	22256	0	0	109070	0	0	33540	0	1	5468	0	0	30732	0	TRUE	TRUE	CodingTranscript	NON_SYNONYMOUS	7	missense	0.60	0.15
11_75277808_C_T	11	75277808	rs751862278	C	T	E	PASS	NA	p.Ser138Ser	p.Ser138Ser	c.414C>T	synonymous		1	243112	0	0.004113	0	15074	0	0	9796	0	0	17176	0	0	22256	0	1	109070	0	0	33540	0	0	5468	0	0	30732	0	FALSE	TRUE	CodingTranscript	SYNONYMOUS	5	synonymous	0.60	0.15
11_75277810_C_T	11	75277810	rs757639350	C	T	E	PASS	NA	p.Ser139Leu	p.Ser139Leu	c.416C>T	missense		1	243092	0	0.004114	0	15076	0	0	9796	0	0	17172	0	0	22250	0	1	109052	0	0	33540	0	0	5468	0	0	30738	0	FALSE	TRUE	CodingTranscript	NON_SYNONYMOUS	7	missense	0.60	0.16
11_75277818_T_C	11	75277818	rs781508942	T	C	E G	PASS	PASS	p.Phe142Leu	p.Phe142Leu	c.424T>C	missense		2	274218	0	0.007293	2	23838	0	0	10108	0	0	18800	0	0	25754	0	0	124154	0	0	34378	0	0	6444	0	0	30742	0	FALSE	TRUE	CodingTranscript	NON_SYNONYMOUS	7	missense	0.60	0.16
11_75277820_C_G	11	75277820	rs371660937	C	G	E	PASS	NA	p.Phe142Leu	p.Phe142Leu	c.426C>G	missense		1	243224	0	0.004111	0	15120	0	0	9804	0	0	17176	0	0	22254	0	0	109130	0	0	33536	0	0	5462	0	1	30742	0	TRUE	TRUE	CodingTranscript	NON_SYNONYMOUS	7	missense	0.60	0.17
11_75277820_C_T	11	75277820	rs371660937	C	T	E G	PASS	PASS	p.Phe142Phe	p.Phe142Phe	c.426C>T	synonymous		3	274176	0	0.01094	1	23840	0	0	10106	0	1	18798	0	0	25746	0	1	124128	0	0	34374	0	0	6442	0	0	30742	0	FALSE	TRUE	CodingTranscript	SYNONYMOUS	5	synonymous	0.60	0.17
11_75277825_A_G	11	75277825	.	A	G	E	PASS	NA	p.Asp144Gly	p.Asp144Gly	c.431A>G	missense		1	243422	0	0.004108	0	15138	0	0	9806	0	0	17184	0	0	22262	0	0	109274	0	1	33542	0	0	5464	0	0	30752	0	FALSE	TRUE	CodingTranscript	NON_SYNONYMOUS	7	missense	0.62	0.19
11_75277827_G_A	11	75277827	.	G	A	E	PASS	NA	p.Asp145Asn	p.Asp145Asn	c.433G>A	missense		1	243344	0	0.004109	0	15138	0	0	9806	0	0	17190	0	0	22236	0	1	109220	0	0	33540	0	0	5464	0	0	30750	0	FALSE	TRUE	CodingTranscript	NON_SYNONYMOUS	7	missense	0.62	0.20
11_75277829_C_A	11	75277829	rs756623619	C	A	E	PASS	NA	p.Asp145Glu	p.Asp145Glu	c.435C>A	missense		1	243410	0	0.004108	0	15146	0	0	9808	0	0	17190	0	0	22240	0	0	109272	0	0	33542	0	0	5462	0	1	30750	0	TRUE	TRUE	CodingTranscript	NON_SYNONYMOUS	7	missense	0.62	0.20
11_75277832_C_T	11	75277832	.	C	T	E	PASS	NA	p.Phe146Phe	p.Phe146Phe	c.438C>T	synonymous		2	243294	0	0.008221	0	15120	0	0	9804	0	0	17186	0	0	22214	0	1	109216	0	1	33542	0	0	5462	0	0	30750	0	FALSE	TRUE	CodingTranscript	SYNONYMOUS	5	synonymous	0.62	0.20
11_75277837_G_A	11	75277837	.	G	A	G	NA	PASS	p.Arg148His	p.Arg148His	c.443G>A	missense		1	30960	0	3.23e-5	1	8718	0	0	302	0	0	1622	0	0	3494	0	0	15004	0	0	838	0	0	982	0	0	0	0	FALSE	TRUE	CodingTranscript	NON_SYNONYMOUS	7	missense	0.61	0.19
11_75277846_A_G	11	75277846	rs749386696	A	G	E	PASS	NA	p.Lys151Arg	p.Lys151Arg	c.452A>G	missense		1	243656	0	0.004104	0	15184	0	0	9802	0	0	17190	0	0	22136	0	1	109570	0	0	33558	0	0	5458	0	0	30758	0	FALSE	TRUE	CodingTranscript	NON_SYNONYMOUS	7	missense	0.60	0.16
11_75277849_A_G	11	75277849	rs768946201	A	G	E G	PASS	PASS	p.Gln152Arg	p.Gln152Arg	c.455A>G	missense		2	274742	0	7.28e-6	1	23926	0	0	10108	0	0	18808	0	0	25618	0	1	124694	0	0	34394	0	0	6438	0	0	30756	0	FALSE	TRUE	CodingTranscript	NON_SYNONYMOUS	7	missense	0.61	0.16
11_75277851_C_A	11	75277851	.	C	A	E	PASS	NA	p.His153Asn	p.His153Asn	c.457C>A	missense		1	243706	0	0.004103	0	15200	0	0	9806	0	0	17188	0	0	22066	0	0	109676	0	0	33554	0	0	5460	0	1	30756	0	TRUE	TRUE	CodingTranscript	NON_SYNONYMOUS	7	missense	0.61	0.17
11_75277853_C_G	11	75277853	.	C	G	E	PASS	NA	p.His153Gln	p.His153Gln	c.459C>G	missense		1	243790	0	0.004102	0	15202	0	1	9812	0	0	17186	0	0	22062	0	0	109758	0	0	33556	0	0	5458	0	0	30756	0	TRUE	TRUE	CodingTranscript	NON_SYNONYMOUS	7	missense	0.62	0.19
11_75277856_C_T	11	75277856	rs779302299	C	T	E G	PASS	PASS	p.Tyr154Tyr	p.Tyr154Tyr	c.462C>T	synonymous		2	274636	0	0.007282	0	23920	0	0	10116	0	2	18804	0	0	25468	0	0	124750	0	0	34392	0	0	6436	0	0	30750	0	FALSE	TRUE	CodingTranscript	SYNONYMOUS	5	synonymous	0.62	0.19
11_75277858_A_G	11	75277858	rs747915459	A	G	E G	PASS	PASS	p.Asn155Ser	p.Asn155Ser	c.464A>G	missense		8	274704	0	0.02912	0	23922	0	1	10116	0	0	18804	0	0	25482	0	7	124794	0	0	34392	0	0	6440	0	0	30754	0	FALSE	TRUE	CodingTranscript	NON_SYNONYMOUS	7	missense	0.62	0.19
11_75277862_C_G	11	75277862	.	C	G	E	PASS	NA	p.Cys156Trp	p.Cys156Trp	c.468C>G	missense		1	243694	0	0.004104	0	15194	0	0	9810	0	0	17182	0	0	21902	0	0	109854	0	0	33552	0	0	5450	0	1	30750	0	TRUE	TRUE	CodingTranscript	NON_SYNONYMOUS	7	missense	0.62	0.19
11_75277862_C_T	11	75277862	.	C	T	E	PASS	NA	p.Cys156Cys	p.Cys156Cys	c.468C>T	synonymous		1	243694	0	0.004104	0	15194	0	0	9810	0	0	17182	0	0	21902	0	0	109854	0	1	33552	0	0	5450	0	0	30750	0	FALSE	TRUE	CodingTranscript	SYNONYMOUS	5	synonymous	0.62	0.19
11_75277863_G_A	11	75277863	.	G	A	E	PASS	NA	p.Glu157Lys	p.Glu157Lys	c.469G>A	missense		2	243646	0	0.008209	0	15200	0	0	9812	0	2	17180	0	0	21880	0	0	109820	0	0	33554	0	0	5448	0	0	30752	0	FALSE	TRUE	CodingTranscript	NON_SYNONYMOUS	7	missense	0.62	0.20
11_75277863_G_C	11	75277863	.	G	C	E	PASS	NA	p.Glu157Gln	p.Glu157Gln	c.469G>C	missense		1	243646	0	0.004104	0	15200	0	0	9812	0	0	17180	0	0	21880	0	0	109820	0	0	33554	0	0	5448	0	1	30752	0	TRUE	TRUE	CodingTranscript	NON_SYNONYMOUS	7	missense	0.62	0.20
11_75277870_C_T	11	75277870	rs771963597	C	T	E	PASS	NA	p.Ser159Phe	p.Ser159Phe	c.476C>T	missense		9	243716	0	0.03693	0	15208	0	0	9808	0	0	17180	0	0	21792	0	4	109970	0	0	33556	0	0	5448	0	5	30754	0	FALSE	TRUE	CodingTranscript	NON_SYNONYMOUS	7	missense	0.61	0.20
11_75277873_A_G	11	75277873	.	A	G	E	PASS	NA	p.Lys160Arg	p.Lys160Arg	c.479A>G	missense		2	243840	0	0.008202	0	15212	0	0	9814	0	0	17184	0	0	21792	0	2	110080	0	0	33556	0	0	5450	0	0	30752	0	FALSE	TRUE	CodingTranscript	NON_SYNONYMOUS	7	missense	0.62	0.20
11_75277875_A_C	11	75277875	rs112083274	A	C	E G	PASS	PASS	p.Ile161Leu	p.Ile161Leu	c.481A>C	missense		34	274736	0	0.0001238	10	23928	0	0	10118	0	0	18806	0	0	25230	0	13	125080	0	9	34394	0	2	6428	0	0	30752	0	TRUE	TRUE	CodingTranscript	NON_SYNONYMOUS	7	missense	0.62	0.19
11_75277879_A_G	11	75277879	rs760648204	A	G	E	PASS	NA	p.Asn162Ser	p.Asn162Ser	c.485A>G	missense		3	243694	0	0.01231	0	15206	0	0	9812	0	0	17182	0	0	21576	0	1	110166	0	1	33552	0	0	5446	0	1	30754	0	FALSE	TRUE	CodingTranscript	NON_SYNONYMOUS	7	missense	0.62	0.20
11_75277880_C_G	11	75277880	rs770842307	C	G	E G	PASS	PASS	p.Asn162Lys	p.Asn162Lys	c.486C>G	missense		4	274706	0	0.01456	0	23928	0	0	10114	0	0	18808	0	0	25080	0	3	125202	0	0	34392	0	0	6426	0	1	30756	0	TRUE	TRUE	CodingTranscript	NON_SYNONYMOUS	7	missense	0.62	0.20
11_75277886_C_T	11	75277886	rs150586616	C	T	E G	PASS	PASS	p.Arg164Arg	p.Arg164Arg	c.492C>T	synonymous		55	274524	0	0.0002003	50	23912	0	0	10122	0	0	18802	0	0	24864	0	1	125254	0	3	34386	0	0	6426	0	1	30758	0	FALSE	TRUE	CodingTranscript	SYNONYMOUS	5	synonymous	0.62	0.20
11_75277893_C_A	11	75277893	rs764819709	C	A	E	PASS	NA	p.Arg167Ser	p.Arg167Ser	c.499C>A	missense		2	243080	0	0.008228	0	15178	0	0	9814	0	0	17184	0	0	20894	0	0	110254	0	2	33554	0	0	5442	0	0	30760	0	TRUE	TRUE	CodingTranscript	NON_SYNONYMOUS	7	missense	0.62	0.21
11_75277900_C_T	11	75277900	rs750807661	C	T	E	PASS	NA	p.Ala169Val	p.Ala169Val	c.506C>T	missense		3	242568	0	0.01237	0	15156	0	0	9808	0	0	17176	0	0	20436	0	3	110246	0	0	33544	0	0	5444	0	0	30758	0	FALSE	TRUE	CodingTranscript	NON_SYNONYMOUS	7	missense	0.63	0.21
11_75277901_G_A	11	75277901	rs756637017	G	A	E	PASS	NA	p.Ala169Ala	p.Ala169Ala	c.507G>A	synonymous		1	242530	0	0.004123	0	15152	0	0	9812	0	0	17176	0	0	20398	0	0	110246	0	0	33548	0	1	5440	0	0	30758	0	FALSE	TRUE	CodingTranscript	SYNONYMOUS	5	synonymous	0.64	0.21
11_75277916_C_A	11	75277916	.	C	A	E	PASS	NA	p.Asn174Lys	p.Asn174Lys	c.522C>A	missense		1	241574	0	4.14e-6	0	15092	0	0	9794	0	0	17170	0	0	19558	0	0	110246	0	0	33542	0	1	5426	0	0	30746	0	TRUE	TRUE	CodingTranscript	NON_SYNONYMOUS	7	missense	0.66	0.23
11_75277916_C_T	11	75277916	.	C	T	E	PASS	NA	p.Asn174Asn	p.Asn174Asn	c.522C>T	synonymous		4	241574	0	0.01656	1	15092	0	0	9794	0	0	17170	0	0	19558	0	0	110246	0	3	33542	0	0	5426	0	0	30746	0	FALSE	TRUE	CodingTranscript	SYNONYMOUS	5	synonymous	0.66	0.23
11_75277917_G_A	11	75277917	rs766813083	G	A	E G	PASS	PASS	p.Glu175Lys	p.Glu175Lys	c.523G>A	missense		4	272458	0	0.01468	0	23824	0	0	10098	0	0	18790	0	0	23012	0	4	125204	0	0	34380	0	0	6406	0	0	30744	0	FALSE	TRUE	CodingTranscript	NON_SYNONYMOUS	7	missense	0.66	0.23
11_75277917_G_T	11	75277917	rs766813083	G	T	E	PASS	NA	p.Glu175Ter	p.Glu175Ter	c.523G>T	stop gained		2	241498	0	0.008282	0	15100	0	0	9796	0	0	17170	0	0	19520	0	0	110200	0	2	33542	0	0	5426	0	0	30744	0	TRUE	TRUE	CodingTranscript	STOP_GAINED	8	stop_gained	0.66	0.23
11_75277919_G_A	11	75277919	.	G	A	E	PASS	NA	p.Glu175Glu	p.Glu175Glu	c.525G>A	synonymous		1	241464	0	0.004141	0	15106	0	0	9792	0	0	17166	0	0	19438	0	0	110242	0	1	33546	0	0	5428	0	0	30746	0	FALSE	TRUE	CodingTranscript	SYNONYMOUS	5	synonymous	0.65	0.23
11_75277925_C_T	11	75277925	rs200467391	C	T	E G	PASS	PASS	p.Ala177Ala	p.Ala177Ala	c.531C>T	synonymous		2	271858	0	0.007357	0	23814	0	0	10098	0	0	18780	0	0	22436	0	2	125204	0	0	34376	0	0	6406	0	0	30744	0	FALSE	TRUE	CodingTranscript	SYNONYMOUS	5	synonymous	0.65	0.23
11_75277926_G_A	11	75277926	rs753922805	G	A	E G	RF	PASS	p.Ala178Thr	p.Ala178Thr	c.532G>A	missense		1	30962	0	3.23e-5	1	8716	0	0	302	0	0	1622	0	0	3494	0	0	15008	0	0	838	0	0	982	0	0	0	0	FALSE	TRUE	CodingTranscript	NON_SYNONYMOUS	7	missense	0.65	0.24
11_75277927_C_T	11	75277927	rs755143041	C	T	E	PASS	NA	p.Ala178Val	p.Ala178Val	c.533C>T	missense		3	240386	0	0.01248	0	15050	0	0	9774	0	0	17158	0	0	18618	0	2	110092	0	1	33534	0	0	5422	0	0	30738	0	FALSE	TRUE	CodingTranscript	NON_SYNONYMOUS	7	missense	0.65	0.24
11_75277937_C_T	11	75277937	.	C	T	E	PASS	NA	p.Thr181Thr	p.Thr181Thr	c.543C>T	synonymous		2	239814	0	8.34e-6	0	15068	0	0	9782	0	0	17136	0	0	18088	0	2	110086	0	0	33524	0	0	5416	0	0	30714	0	FALSE	TRUE	CodingTranscript	SYNONYMOUS	5	synonymous	0.65	0.24
11_75277941_G_A	11	75277941	rs758606932	G	A	E G	PASS	PASS	p.Gly183Ser	p.Gly183Ser	c.547G>A	missense		3	270588	0	0.01109	0	23778	0	0	10094	0	0	18740	0	0	21390	0	3	125116	0	0	34360	0	0	6402	0	0	30708	0	FALSE	TRUE	CodingTranscript	NON_SYNONYMOUS	7	missense	0.64	0.23
11_75277941_G_C	11	75277941	rs758606932	G	C	E	PASS	NA	p.Gly183Arg	p.Gly183Arg	c.547G>C	missense		2	239616	0	0.008347	0	15048	0	0	9792	0	0	17118	0	0	17896	0	2	110110	0	0	33524	0	0	5420	0	0	30708	0	TRUE	TRUE	CodingTranscript	NON_SYNONYMOUS	7	missense	0.64	0.23
11_75277949_G_C	11	75277949	.	G	C	E	PASS	NA	p.Leu185Leu	p.Leu185Leu	c.555G>C	synonymous		2	238750	0	0.008377	0	14970	0	0	9786	0	0	17108	0	0	17366	0	2	109910	0	0	33516	0	0	5410	0	0	30684	0	TRUE	TRUE	CodingTranscript	SYNONYMOUS	5	synonymous	0.65	0.25
11_75277952_C_G	11	75277952	rs535816918	C	G	E	PASS	NA	p.Pro186Pro	p.Pro186Pro	c.558C>G	synonymous		1	238658	0	4.19e-6	0	14964	0	0	9790	0	0	17112	0	0	17292	0	1	109906	0	0	33506	0	0	5406	0	0	30682	0	TRUE	TRUE	CodingTranscript	SYNONYMOUS	5	synonymous	0.66	0.25
11_75277959_A_G	11	75277959	rs138784081	A	G	E G	PASS	PASS	p.Thr189Ala	p.Thr189Ala	c.565A>G	missense		32	269018	0	0.0001190	24	23646	0	0	10094	0	0	18712	0	0	20372	0	0	124796	0	7	34336	0	1	6384	0	0	30678	0	FALSE	TRUE	CodingTranscript	NON_SYNONYMOUS	7	missense	0.68	0.28
11_75277964_G_A	11	75277964	.	G	A	E G	PASS	PASS	p.Lys190Lys	p.Lys190Lys	c.570G>A	synonymous		3	268330	0	0.01118	0	23600	0	0	10082	0	0	18694	0	0	19946	0	3	124656	0	0	34318	0	0	6382	0	0	30652	0	FALSE	TRUE	CodingTranscript	SYNONYMOUS	5	synonymous	0.68	0.25
11_75277965_G_A	11	75277965	.	G	A	E	PASS	NA	p.Asp191Asn	p.Asp191Asn	c.571G>A	missense		2	237026	0	0.008438	1	14836	0	0	9774	0	0	17062	0	0	16246	0	0	109582	0	1	33476	0	0	5404	0	0	30646	0	FALSE	TRUE	CodingTranscript	NON_SYNONYMOUS	7	missense	0.68	0.25
11_75277967_C_A	11	75277967	rs745340617	C	A	E G	PASS	PASS	p.Asp191Glu	p.Asp191Glu	c.573C>A	missense		14	267872	0	0.05226	0	23566	0	0	10072	0	0	18684	0	0	19656	0	6	124558	0	0	34310	0	0	6380	0	8	30646	0	TRUE	TRUE	CodingTranscript	NON_SYNONYMOUS	7	missense	0.68	0.25
11_75277969_T_C	11	75277969	rs769259507	T	C	E	PASS	NA	p.Val192Ala	p.Val192Ala	c.575T>C	missense		1	236628	0	0.004226	0	14808	0	0	9770	0	0	17060	0	0	16014	0	0	109488	0	0	33460	0	0	5390	0	1	30638	0	FALSE	TRUE	CodingTranscript	NON_SYNONYMOUS	7	missense	0.68	0.24
11_75277969_T_G	11	75277969	rs769259507	T	G	E	PASS	NA	p.Val192Gly	p.Val192Gly	c.575T>G	missense		2	236628	0	0.008452	0	14808	0	0	9770	0	0	17060	0	0	16014	0	0	109488	0	0	33460	0	0	5390	0	2	30638	0	TRUE	TRUE	CodingTranscript	NON_SYNONYMOUS	7	missense	0.68	0.24
11_75277973_G_A	11	75277973	rs559687602	G	A	E	PASS	NA	p.Glu193Glu	p.Glu193Glu	c.579G>A	synonymous		2	235740	0	0.008484	0	14752	0	0	9760	0	0	17034	0	0	15528	0	2	109208	0	0	33448	0	0	5388	0	0	30622	0	FALSE	TRUE	CodingTranscript	SYNONYMOUS	5	synonymous	0.68	0.24
11_75277973_G_C	11	75277973	rs559687602	G	C	E G	PASS	PASS	p.Glu193Asp	p.Glu193Asp	c.579G>C	missense		17	266718	0	0.06374	12	23488	0	3	10062	0	0	18656	0	0	19022	0	0	124212	0	1	34286	0	0	6370	0	1	30622	0	TRUE	TRUE	CodingTranscript	NON_SYNONYMOUS	7	missense	0.68	0.24
11_75277974_C_A	11	75277974	rs141721173	C	A	E G	PASS	PASS	p.Arg194Ser	p.Arg194Ser	c.580C>A	missense		217	266688	0	0.0008137	16	23506	0	3	10058	0	0	18654	0	16	19000	0	152	124192	0	26	34288	0	3	6368	0	1	30622	0	TRUE	TRUE	CodingTranscript	NON_SYNONYMOUS	7	missense	0.68	0.23
11_75277983_G_C	11	75277983	rs766872022	G	C	E	PASS	NA	p.Gly197Arg	p.Gly197Arg	c.589G>C	missense		1	234234	0	0.004269	0	14670	0	0	9730	0	1	17016	0	0	14694	0	0	108754	0	0	33428	0	0	5364	0	0	30578	0	TRUE	TRUE	CodingTranscript	NON_SYNONYMOUS	7	missense	0.67	0.21
11_75277989_C_T	11	75277989	rs377081876	C	T	E G	PASS	PASS	p.Leu199Leu	p.Leu199Leu	c.595C>T	synonymous		5	264636	0	0.01889	0	23346	0	0	10036	0	0	18636	0	0	17828	0	5	123606	0	0	34264	0	0	6346	0	0	30574	0	FALSE	TRUE	CodingTranscript	SYNONYMOUS	5	synonymous	0.68	0.21
11_75277991_G_C	11	75277991	.	G	C	E	PASS	NA	p.Leu199Leu	p.Leu199Leu	c.597G>C	synonymous		1	233186	0	0.004288	0	14544	0	0	9726	0	0	17008	0	0	14104	0	0	108452	0	0	33422	0	0	5356	0	1	30574	0	TRUE	TRUE	CodingTranscript	SYNONYMOUS	5	synonymous	0.69	0.21
11_75277992_C_T	11	75277992	rs651581	C	T	E G	PASS	PASS	p.Leu200Leu	p.Leu200Leu	c.598C>T	synonymous		114053	263674	27232	0.4326	3688	23232	286	5136	10018	1335	5121	18618	704	7800	17490	1744	68141	123214	18803	10767	34204	1803	2899	6334	651	10501	30564	1906	FALSE	TRUE	CodingTranscript	SYNONYMOUS	5	synonymous	0.69	0.20
11_75277994_A_C	11	75277994	rs764723506	A	C	E	PASS	NA	p.Leu200Leu	p.Leu200Leu	c.600A>C	synonymous		19	232594	0	0.08169	1	14520	0	0	9722	0	0	17000	0	0	13790	0	18	108244	0	0	33416	0	0	5340	0	0	30562	0	TRUE	TRUE	CodingTranscript	SYNONYMOUS	5	synonymous	0.69	0.20
11_75277997_C_T	11	75277997	.	C	T	E	PASS	NA	p.Val201Val	p.Val201Val	c.603C>T	synonymous		1	232426	0	0.004302	0	14504	0	0	9724	0	0	16994	0	1	13686	0	0	108198	0	0	33424	0	0	5336	0	0	30560	0	FALSE	TRUE	CodingTranscript	SYNONYMOUS	5	synonymous	0.68	0.20
11_75278000_C_G	11	75278000	.	C	G	G	NA	PASS	p.Asn202Lys	p.Asn202Lys	c.606C>G	missense		1	30950	0	0.03231	0	8728	0	0	302	0	0	1622	0	0	3494	0	1	14984	0	0	838	0	0	982	0	0	0	0	TRUE	TRUE	CodingTranscript	NON_SYNONYMOUS	7	missense	0.67	0.20
11_75278007_T_G	11	75278007	rs777869458	T	G	E	PASS	NA	p.Phe205Val	p.Phe205Val	c.613T>G	missense		1	231216	0	0.004325	0	14390	0	0	9694	0	0	17000	0	0	13204	0	0	107654	0	0	33412	0	0	5322	0	1	30540	0	TRUE	TRUE	CodingTranscript	NON_SYNONYMOUS	7	missense	0.66	0.19
11_75278020_A_AGTCG	11	75278020	.	A	AGTCG	G	NA	PASS	c.622+6_622+9dupTCGG		c.622+6_622+9dupTCGG	splice region		3	30156	0	0.09948	0	8590	0	0	296	0	0	1596	0	0	3460	0	3	14442	0	0	822	0	0	950	0	0	0	0	NA	TRUE	Transcript	SPLICE_SITE	5	splice,intron,feature_elongation	0.65	0.18
11_75278023_C_T	11	75278023	rs757033716	C	T	E	PASS	NA	c.622+7C>T		c.622+7C>T	splice region		5	226868	0	0.02204	0	14030	0	0	9560	0	1	16950	0	0	12374	0	0	104914	0	0	33342	0	0	5274	0	4	30424	0	FALSE	TRUE	Transcript	SPLICE_SITE	5	splice,intron	0.65	0.19
11_75278024_G_T	11	75278024	rs781004270	G	T	E	PASS	NA	c.622+8G>T		c.622+8G>T	splice region		10	226660	0	0.04412	0	14030	0	0	9546	0	0	16950	0	0	12334	0	1	104776	0	9	33352	0	0	5264	0	0	30408	0	TRUE	TRUE	Transcript	SPLICE_SITE	5	splice,intron	0.65	0.19
11_75278025_G_A	11	75278025	rs769777035	G	A	E	PASS	NA			c.622+9G>A	intron		1	226502	0	0.004415	0	14018	0	0	9546	0	1	16948	0	0	12324	0	0	104676	0	0	33336	0	0	5264	0	0	30390	0	FALSE	TRUE	Transcript	INTRONIC	2	intron	0.64	0.19
11_75278028_G_A	11	75278028	rs576964959	G	A	E	PASS	NA			c.622+12G>A	intron		10	224774	0	0.04449	0	13914	0	0	9480	0	0	16928	0	0	12112	0	0	103522	0	0	33280	0	0	5224	0	10	30314	0	FALSE	TRUE	Transcript	INTRONIC	2	intron	0.63	0.17
11_75278034_T_G	11	75278034	rs748749367	T	G	E	PASS	NA			c.622+18T>G	intron		6	208940	0	0.02872	0	13348	0	0	8644	0	0	16338	0	0	11200	0	0	93568	0	6	32102	0	0	4856	0	0	28884	0	TRUE	TRUE	Transcript	INTRONIC	2	intron	0.63	0.17
11_75278040_G_GTCC	11	75278040	rs35462148	G	GTCC	E G	PASS	PASS			c.622+37_622+39dupTCC	intron		100073	240658	20119	0.4158	6016	21968	744	4320	9036	974	5298	18082	660	5956	14450	1123	55688	109588	12983	10439	33076	1576	2543	5856	496	9813	28602	1563	NA	TRUE	Transcript	INTRONIC	2	intron,feature_elongation	0.62	0.17
11_75278040_G_GTCCTCC	11	75278040	rs35462148	G	GTCCTCC	E	PASS	NA			c.622+34_622+39dupTCCTCC	intron		6	209974	0	0.02857	0	13280	0	0	8734	0	1	16472	0	0	10972	0	0	94784	0	0	32246	0	0	4884	0	5	28602	0	NA	TRUE	Transcript	INTRONIC	2	intron,feature_elongation	0.62	0.17
11_75278046_C_CTCT	11	75278046	rs777940027	C	CTCT	E	PASS	NA			c.622+32_622+33insTTC	intron		1	222422	0	0.004496	0	13658	0	0	9362	0	0	16890	0	0	11784	0	1	102460	0	0	33162	0	0	5166	0	0	29940	0	NA	TRUE	Transcript	INTRONIC	2	intron,feature_elongation	0.61	0.16
11_75278048_C_T	11	75278048	.	C	T	G	NA	PASS			c.622+32C>T	intron		2	30898	0	0.06473	2	8714	0	0	302	0	0	1616	0	0	3494	0	0	14954	0	0	838	0	0	980	0	0	0	0	FALSE	TRUE	Transcript	INTRONIC	2	intron	0.61	0.16
11_75278050_T_TCCC	11	75278050	rs753951992	T	TCCC	E G	PASS	PASS			c.622+36_622+37insCCC	intron		776	252606	1	0.003072	35	22332	0	3	9588	0	0	18482	0	17	15178	0	633	117168	1	74	33940	0	13	6124	0	1	29794	0	NA	TRUE	Transcript	INTRONIC	2	intron,feature_elongation	0.61	0.14
11_75278051_C_A	11	75278051	rs868675056	C	A	G	NA	PASS			c.622+35C>A	intron		1	30652	0	0.03262	1	8674	0	0	302	0	0	1610	0	0	3482	0	0	14778	0	0	832	0	0	974	0	0	0	0	TRUE	TRUE	Transcript	INTRONIC	2	intron	0.60	0.15
11_75278054_C_T	11	75278054	.	C	T	G	NA	PASS			c.622+38C>T	intron		1	30904	0	0.03236	1	8714	0	0	302	0	0	1622	0	0	3492	0	0	14958	0	0	836	0	0	980	0	0	0	0	FALSE	TRUE	Transcript	INTRONIC	2	intron	0.60	0.13
11_75278055_C_CT	11	75278055	.	C	CT	G	NA	PASS			c.622+39_622+40insT	intron		5	30950	0	0.0001616	0	8722	0	0	302	0	0	1622	0	0	3492	0	5	14992	0	0	838	0	0	982	0	0	0	0	NA	TRUE	Transcript	INTRONIC	2	intron,feature_elongation	0.59	0.13
11_75278056_C_CCG	11	75278056	rs773909381	C	CCG	G	NA	PASS			c.622+40_622+41insCG	intron		4	29568	0	0.0001353	0	8432	0	0	286	0	0	1572	0	0	3346	0	4	14164	0	0	822	0	0	946	0	0	0	0	NA	TRUE	Transcript	INTRONIC	2	intron,feature_elongation	0.59	0.13
11_75278056_C_CCT	11	75278056	rs773909381	C	CCT	G	NA	PASS			c.622+40_622+41insCT	intron		1	29568	0	0.03382	0	8432	0	0	286	0	0	1572	0	0	3346	0	1	14164	0	0	822	0	0	946	0	0	0	0	NA	TRUE	Transcript	INTRONIC	2	intron,feature_elongation	0.59	0.13
11_75278056_C_G	11	75278056	rs773909381	C	G	E	PASS	NA			c.622+40C>G	intron		1	170694	0	0.005858	0	11918	0	0	6666	0	0	15238	0	1	8362	0	0	70836	0	0	29604	0	0	4120	0	0	23950	0	TRUE	TRUE	Transcript	INTRONIC	2	intron	0.59	0.13
11_75278056_C_T	11	75278056	rs773909381	C	T	E	PASS	NA			c.622+40C>T	intron		4	170694	0	0.02343	0	11918	0	0	6666	0	0	15238	0	0	8362	0	0	70836	0	0	29604	0	0	4120	0	4	23950	0	FALSE	TRUE	Transcript	INTRONIC	2	intron	0.59	0.13
11_75278059_G_C	11	75278059	rs761570131	G	C	E	PASS	NA			c.622+43G>C	intron		1	173442	0	0.005766	0	11900	0	0	6826	0	0	15258	0	0	8458	0	0	72998	0	0	29772	0	0	4178	0	1	24052	0	TRUE	TRUE	Transcript	INTRONIC	2	intron	0.59	0.12
11_75278071_G_A	11	75278071	.	G	A	G	NA	PASS			c.622+55G>A	intron		1	30966	0	0.03229	0	8730	0	0	302	0	1	1620	0	0	3494	0	0	15000	0	0	838	0	0	982	0	0	0	0	FALSE	TRUE	Transcript	INTRONIC	2	intron	0.59	0.11
11_75278078_G_T	11	75278078	.	G	T	G	NA	PASS			c.622+62G>T	intron		1	30972	0	0.03229	0	8732	0	0	302	0	0	1622	0	1	3494	0	0	15002	0	0	838	0	0	982	0	0	0	0	TRUE	TRUE	Transcript	INTRONIC	2	intron	0.58	0.09
11_75278806_G_A	11	75278806	.	G	A	G	NA	PASS			c.622+790G>A	intron		1	30970	0	0.03229	1	8732	0	0	302	0	0	1618	0	0	3492	0	0	15006	0	0	838	0	0	982	0	0	0	0	FALSE	TRUE	Transcript	INTRONIC	2	intron	0.44	0.00
11_75278811_G_C	11	75278811	rs145556156	G	C	G	NA	PASS			c.622+795G>C	intron		15	30960	0	0.0004845	0	8730	0	0	302	0	0	1620	0	0	3490	0	13	15000	0	1	836	0	1	982	0	0	0	0	TRUE	TRUE	Transcript	INTRONIC	2	intron	0.45	0.01
11_75278856_C_A	11	75278856	rs12223805	C	A	G	NA	PASS			c.-949C>A	5' UTR		47	30970	1	0.001518	6	8728	0	0	302	0	40	1622	1	0	3494	0	0	15006	0	0	838	0	1	980	0	0	0	0	TRUE	TRUE	Transcript	INTRONIC	2	intron	0.42	0.03
11_75278881_C_A	11	75278881	.	C	A	G	NA	PASS			c.-924C>A	5' UTR		1	30962	0	3.23e-5	1	8730	0	0	302	0	0	1622	0	0	3494	0	0	14994	0	0	838	0	0	982	0	0	0	0	TRUE	TRUE	Transcript	INTRONIC	2	intron	0.44	0.03
11_75278921_C_T	11	75278921	.	C	T	G	NA	PASS			c.-884C>T	5' UTR		1	30976	0	0.03228	0	8730	0	0	302	0	0	1622	0	0	3494	0	1	15010	0	0	838	0	0	980	0	0	0	0	FALSE	TRUE	Transcript	INTRONIC	2	intron	0.52	0.03
11_75278945_G_A	11	75278945	.	G	A	G	NA	PASS			c.-860G>A	5' UTR		1	30980	0	0.03228	0	8730	0	0	302	0	0	1622	0	0	3494	0	1	15012	0	0	838	0	0	982	0	0	0	0	FALSE	TRUE	Transcript	INTRONIC	2	intron	0.49	0.03
11_75278955_A_G	11	75278955	.	A	G	G	NA	PASS			c.-850A>G	5' UTR		1	30980	0	0.03228	0	8732	0	0	302	0	0	1622	0	0	3494	0	1	15010	0	0	838	0	0	982	0	0	0	0	FALSE	TRUE	Transcript	INTRONIC	2	intron	0.52	0.03
11_75278959_G_T	11	75278959	.	G	T	G	NA	PASS			c.-846G>T	5' UTR		1	30978	0	0.03228	0	8732	0	0	302	0	0	1622	0	0	3494	0	1	15010	0	0	838	0	0	980	0	0	0	0	TRUE	TRUE	Transcript	INTRONIC	2	intron	0.51	0.03
11_75278980_G_A	11	75278980	.	G	A	G	NA	PASS			c.-825G>A	5' UTR		2	30968	0	0.06458	0	8726	0	0	302	0	0	1622	0	0	3492	0	2	15010	0	0	838	0	0	978	0	0	0	0	FALSE	TRUE	Transcript	INTRONIC	2	intron	0.51	0.03
11_75278993_T_A	11	75278993	.	T	A	G	NA	PASS			c.-812T>A	5' UTR		1	30952	0	0.03231	0	8726	0	0	302	0	0	1618	0	0	3494	0	1	14996	0	0	838	0	0	978	0	0	0	0	TRUE	TRUE	Transcript	INTRONIC	2	intron	0.52	0.03
11_75278996_C_T	11	75278996	.	C	T	G	NA	PASS			c.-809C>T	5' UTR		1	30962	0	3.23e-5	0	8728	0	0	302	0	0	1620	0	0	3494	0	1	15002	0	0	838	0	0	978	0	0	0	0	FALSE	TRUE	Transcript	INTRONIC	2	intron	0.52	0.03
11_75279029_A_G	11	75279029	.	A	G	G	NA	PASS			c.-776A>G	5' UTR		1	30940	0	0.03232	0	8728	0	0	302	0	0	1620	0	0	3494	0	1	14986	0	0	838	0	0	972	0	0	0	0	FALSE	TRUE	Transcript	INTRONIC	2	intron	0.50	0.01
11_75279059_G_T	11	75279059	.	G	T	G	NA	PASS			c.-746G>T	5' UTR		3	30934	0	0.09698	3	8726	0	0	302	0	0	1620	0	0	3494	0	0	14978	0	0	838	0	0	976	0	0	0	0	TRUE	TRUE	Transcript	INTRONIC	2	intron	0.50	0.01
11_75279079_T_C	11	75279079	rs605040	T	C	G	NA	PASS			c.-726T>C	5' UTR		13514	30864	3111	0.4379	2527	8712	361	151	302	34	502	1618	76	1563	3488	350	8013	14934	2129	304	836	48	454	974	113	0	0	0	FALSE	FALSE	Transcript	INTRONIC	2	intron	0.50	0.01
11_75279128_G_A	11	75279128	rs780697914	G	A	G	NA	PASS			c.-677G>A	5' UTR		1	30948	0	0.03231	0	8730	0	0	302	0	0	1622	0	0	3494	0	1	14984	0	0	838	0	0	978	0	0	0	0	FALSE	TRUE	Transcript	INTRONIC	2	intron	0.54	0.04
11_75279142_G_A	11	75279142	.	G	A	G	NA	PASS			c.-663G>A	5' UTR		1	30946	0	0.03231	0	8728	0	0	302	0	0	1620	0	0	3494	0	1	14984	0	0	838	0	0	980	0	0	0	0	FALSE	TRUE	Transcript	INTRONIC	2	intron	0.54	0.04
11_75279162_C_T	11	75279162	rs535324818	C	T	G	NA	PASS			c.-643C>T	5' UTR		2	30902	0	0.06472	0	8710	0	0	302	0	0	1618	0	0	3492	0	2	14962	0	0	838	0	0	980	0	0	0	0	FALSE	TRUE	Transcript	INTRONIC	2	intron	0.55	0.04
11_75279169_C_T	11	75279169	.	C	T	G	NA	PASS			c.-636C>T	5' UTR		2	30888	0	0.06475	2	8716	0	0	302	0	0	1620	0	0	3490	0	0	14940	0	0	838	0	0	982	0	0	0	0	FALSE	TRUE	Transcript	INTRONIC	2	intron	0.56	0.04
11_75279183_A_C	11	75279183	rs747756937	A	C	G	NA	PASS			c.-622A>C	5' UTR		1	30908	0	0.03235	0	8724	0	0	302	0	0	1614	0	0	3490	0	1	14964	0	0	838	0	0	976	0	0	0	0	TRUE	TRUE	Transcript	INTRONIC	2	intron	0.56	0.05
11_75279194_C_G	11	75279194	.	C	G	G	NA	PASS			c.-611C>G	5' UTR		1	30910	0	0.03235	0	8724	0	0	300	0	0	1618	0	0	3488	0	1	14962	0	0	838	0	0	980	0	0	0	0	TRUE	TRUE	Transcript	INTRONIC	2	intron	0.55	0.05
11_75279195_G_A	11	75279195	.	G	A	G	NA	PASS			c.-610G>A	5' UTR		3	30934	0	0.09698	0	8732	0	0	302	0	3	1620	0	0	3492	0	0	14970	0	0	838	0	0	980	0	0	0	0	FALSE	TRUE	Transcript	INTRONIC	2	intron	0.55	0.05
11_75279203_G_A	11	75279203	.	G	A	G	NA	PASS			c.-602G>A	5' UTR		1	30934	0	0.03233	0	8728	0	0	302	0	1	1620	0	0	3492	0	0	14978	0	0	836	0	0	978	0	0	0	0	FALSE	TRUE	Transcript	INTRONIC	2	intron	0.56	0.05
11_75279214_G_A	11	75279214	.	G	A	G	NA	PASS			c.-591G>A	5' UTR		4	30946	0	0.0001293	1	8730	0	3	302	0	0	1622	0	0	3492	0	0	14982	0	0	838	0	0	980	0	0	0	0	FALSE	TRUE	Transcript	INTRONIC	2	intron	0.55	0.05
11_75279232_G_C	11	75279232	rs140465492	G	C	G	NA	PASS			c.-573G>C	5' UTR		119	30938	0	0.003846	35	8726	0	0	302	0	50	1620	0	1	3494	0	13	14976	0	13	838	0	7	982	0	0	0	0	TRUE	TRUE	Transcript	INTRONIC	2	intron	0.55	0.05
11_75279249_G_A	11	75279249	rs569745383	G	A	G	NA	PASS			c.-556G>A	5' UTR		1	30914	0	0.03235	0	8716	0	0	302	0	1	1620	0	0	3490	0	0	14966	0	0	838	0	0	982	0	0	0	0	FALSE	TRUE	Transcript	INTRONIC	2	intron	0.55	0.04
11_75279256_C_G	11	75279256	.	C	G	G	NA	PASS			c.-549C>G	5' UTR		1	30878	0	0.03239	0	8716	0	0	302	0	1	1622	0	0	3484	0	0	14940	0	0	836	0	0	978	0	0	0	0	TRUE	TRUE	Transcript	INTRONIC	2	intron	0.56	0.05
11_75279258_T_G	11	75279258	.	T	G	G	NA	PASS			c.-547T>G	5' UTR		1	30884	0	0.03238	0	8704	0	0	302	0	1	1620	0	0	3492	0	0	14952	0	0	838	0	0	976	0	0	0	0	TRUE	FALSE	Transcript	INTRONIC	2	intron	0.57	0.05
11_75279285_G_C	11	75279285	.	G	C	G	NA	PASS			c.-520G>C	5' UTR		2	30930	0	0.06466	1	8728	0	0	302	0	0	1622	0	0	3492	0	1	14968	0	0	838	0	0	980	0	0	0	0	TRUE	TRUE	Transcript	INTRONIC	2	intron	0.49	0.03
11_75279289_G_A	11	75279289	.	G	A	G	NA	PASS			c.-516G>A	5' UTR		2	30910	0	6.47e-5	1	8714	0	0	302	0	0	1622	0	0	3492	0	1	14964	0	0	838	0	0	978	0	0	0	0	FALSE	TRUE	Transcript	INTRONIC	2	intron	0.48	0.03
11_75279290_T_C	11	75279290	rs645935	T	C	G	NA	PASS			c.-515T>C	5' UTR		25049	30752	10300	0.8145	6771	8692	2630	245	300	98	802	1610	184	2848	3476	1173	12969	14864	5662	608	834	220	806	976	333	0	0	0	FALSE	FALSE	Transcript	INTRONIC	2	intron	0.48	0.03
11_75279383_C_G	11	75279383	.	C	G	G	NA	PASS			c.-422C>G	5' UTR		1	30924	0	0.03234	0	8716	0	0	302	0	0	1622	0	0	3490	0	1	14980	0	0	838	0	0	976	0	0	0	0	TRUE	TRUE	Transcript	INTRONIC	2	intron	0.50	0.01
11_75279400_C_T	11	75279400	rs572098676	C	T	G	NA	PASS			c.-405C>T	5' UTR		1	30940	0	0.03232	1	8720	0	0	302	0	0	1622	0	0	3490	0	0	14992	0	0	836	0	0	978	0	0	0	0	FALSE	TRUE	Transcript	INTRONIC	2	intron	0.49	0.00
11_75279403_TC_T	11	75279403	.	TC	T	G	NA	PASS			c.-397delC	5' UTR		1	30912	0	0.03235	0	8720	0	0	302	0	0	1622	0	0	3488	0	1	14968	0	0	836	0	0	976	0	0	0	0	NA	TRUE	Transcript	INTRONIC	2	intron,feature_truncation	0.50	0.01
11_75279404_C_T	11	75279404	rs75530338	C	T	G	NA	PASS			c.-401C>T	5' UTR		480	30934	17	0.01552	472	8718	17	0	302	0	0	1622	0	0	3494	0	0	14984	0	6	838	0	2	976	0	0	0	0	FALSE	TRUE	Transcript	INTRONIC	2	intron	0.50	0.01
11_75279412_T_A	11	75279412	.	T	A	G	NA	PASS			c.-393T>A	5' UTR		1	30930	0	0.03233	1	8720	0	0	302	0	0	1622	0	0	3490	0	0	14980	0	0	838	0	0	978	0	0	0	0	TRUE	TRUE	Transcript	INTRONIC	2	intron	0.51	0.01
11_75279412_T_C	11	75279412	.	T	C	G	NA	PASS			c.-393T>C	5' UTR		1	30930	0	0.03233	0	8720	0	0	302	0	0	1622	0	0	3490	0	0	14980	0	0	838	0	1	978	0	0	0	0	FALSE	TRUE	Transcript	INTRONIC	2	intron	0.51	0.01
11_75279418_G_A	11	75279418	.	G	A	G	NA	PASS			c.-387G>A	5' UTR		1	30940	0	0.03232	1	8716	0	0	302	0	0	1622	0	0	3492	0	0	14992	0	0	838	0	0	978	0	0	0	0	FALSE	TRUE	Transcript	INTRONIC	2	intron	0.52	0.01
11_75279421_G_T	11	75279421	.	G	T	G	NA	PASS			c.-384G>T	5' UTR		1	30948	0	0.03231	0	8726	0	0	302	0	0	1622	0	0	3492	0	1	14992	0	0	838	0	0	976	0	0	0	0	TRUE	TRUE	Transcript	INTRONIC	2	intron	0.54	0.01
11_75279446_G_T	11	75279446	.	G	T	G	NA	PASS			c.-359G>T	5' UTR		1	30946	0	0.03231	1	8720	0	0	302	0	0	1620	0	0	3492	0	0	14994	0	0	838	0	0	980	0	0	0	0	TRUE	TRUE	Transcript	INTRONIC	2	intron	0.58	0.03
11_75279447_T_C	11	75279447	rs646474	T	C	G	NA	PASS			c.-358T>C	5' UTR		12239	30842	2812	0.3968	1352	8700	105	151	300	34	452	1614	59	1562	3482	351	7998	14938	2118	284	834	39	440	974	106	0	0	0	FALSE	TRUE	Transcript	INTRONIC	2	intron	0.58	0.03
11_75279455_AT_A	11	75279455	.	AT	A	G	NA	PASS			c.-349delT	5' UTR		1	30932	0	0.03233	0	8718	0	0	300	0	0	1622	0	0	3492	0	1	14982	0	0	838	0	0	980	0	0	0	0	NA	TRUE	Transcript	INTRONIC	2	intron,feature_truncation	0.55	0.03
11_75279458_T_C	11	75279458	.	T	C	G	NA	PASS			c.-347T>C	5' UTR		1	30936	0	0.03232	0	8720	0	0	300	0	0	1620	0	0	3490	0	1	14990	0	0	838	0	0	978	0	0	0	0	FALSE	TRUE	Transcript	INTRONIC	2	intron	0.56	0.03
11_75279471_A_G	11	75279471	.	A	G	G	NA	PASS			c.-334A>G	5' UTR		1	30956	0	3.23e-5	1	8728	0	0	302	0	0	1622	0	0	3492	0	0	14992	0	0	838	0	0	982	0	0	0	0	FALSE	TRUE	Transcript	INTRONIC	2	intron	0.54	0.03
11_75279476_C_T	11	75279476	rs646851	C	T	G	NA	PASS			c.-329C>T	5' UTR		13530	30848	3116	0.4386	2537	8696	364	151	302	34	503	1614	76	1564	3490	351	8015	14932	2130	303	834	48	457	980	113	0	0	0	FALSE	FALSE	Transcript	INTRONIC	2	intron	0.54	0.03
11_75279485_C_A	11	75279485	.	C	A	G	NA	PASS			c.-320C>A	5' UTR		2	30936	0	0.06465	0	8716	0	1	302	0	0	1622	0	0	3494	0	0	14988	0	1	838	0	0	976	0	0	0	0	TRUE	TRUE	Transcript	INTRONIC	2	intron	0.54	0.03
11_75279500_A_G	11	75279500	.	A	G	G	NA	PASS			c.-305A>G	5' UTR		1	30856	0	0.03241	0	8682	0	0	302	0	0	1618	0	0	3492	0	1	14946	0	0	836	0	0	980	0	0	0	0	FALSE	TRUE	Transcript	INTRONIC	2	intron	0.53	0.04
11_75279510_G_A	11	75279510	rs563954714	G	A	G	NA	PASS			c.-295G>A	5' UTR		4	30904	0	0.0001294	3	8704	0	0	302	0	0	1620	0	0	3492	0	1	14972	0	0	836	0	0	978	0	0	0	0	FALSE	TRUE	Transcript	INTRONIC	2	intron	0.54	0.04
11_75279539_C_T	11	75279539	rs646920	C	T	G	NA	PASS			c.-266C>T	5' UTR		12207	30748	2802	0.3970	1345	8668	102	151	302	34	452	1612	60	1563	3490	351	7972	14870	2110	283	832	39	441	974	106	0	0	0	FALSE	TRUE	Transcript	INTRONIC	2	intron	0.57	0.04
11_75279543_C_T	11	75279543	.	C	T	G	NA	PASS			c.-262C>T	5' UTR		3	30904	0	0.09707	3	8716	0	0	302	0	0	1622	0	0	3492	0	0	14960	0	0	832	0	0	980	0	0	0	0	FALSE	TRUE	Transcript	INTRONIC	2	intron	0.57	0.04
11_75279544_A_C	11	75279544	.	A	C	G	NA	PASS			c.-261A>C	5' UTR		2	30906	0	0.06471	0	8714	0	0	302	0	2	1620	0	0	3492	0	0	14964	0	0	838	0	0	976	0	0	0	0	TRUE	TRUE	Transcript	INTRONIC	2	intron	0.57	0.04
11_75279549_C_T	11	75279549	rs189069347	C	T	G	NA	PASS			c.-256C>T	5' UTR		11	30914	0	0.0003558	3	8716	0	0	302	0	0	1620	0	0	3492	0	8	14970	0	0	836	0	0	978	0	0	0	0	FALSE	TRUE	Transcript	INTRONIC	2	intron	0.57	0.04
11_75279578_G_A	11	75279578	.	G	A	G	NA	PASS			c.-227G>A	5' UTR		1	30934	0	0.03233	0	8722	0	0	302	0	0	1622	0	0	3494	0	1	14974	0	0	838	0	0	982	0	0	0	0	FALSE	TRUE	Transcript	INTRONIC	2	intron	0.56	0.03
11_75279606_C_G	11	75279606	.	C	G	G	NA	PASS			c.-199C>G	5' UTR		1	30942	0	0.03232	0	8722	0	0	302	0	0	1620	0	0	3490	0	1	14990	0	0	838	0	0	980	0	0	0	0	TRUE	TRUE	Transcript	INTRONIC	2	intron	0.58	0.01
11_75279619_C_T	11	75279619	.	C	T	G	NA	PASS			c.-186C>T	5' UTR		1	30930	0	0.03233	1	8720	0	0	302	0	0	1622	0	0	3492	0	0	14978	0	0	838	0	0	978	0	0	0	0	FALSE	TRUE	Transcript	INTRONIC	2	intron	0.54	0.01
11_75279622_T_G	11	75279622	rs531078667	T	G	G	NA	PASS			c.-183T>G	5' UTR		19	30918	0	0.0006145	19	8716	0	0	300	0	0	1620	0	0	3492	0	0	14976	0	0	838	0	0	976	0	0	0	0	TRUE	TRUE	Transcript	INTRONIC	2	intron	0.55	0.01
11_75279630_G_A	11	75279630	.	G	A	G	NA	PASS			c.-175G>A	5' UTR		1	30912	0	0.03235	1	8706	0	0	302	0	0	1622	0	0	3492	0	0	14970	0	0	838	0	0	982	0	0	0	0	FALSE	TRUE	Transcript	INTRONIC	2	intron	0.58	0.03
11_75279634_G_GCTCTATAGCTGGGCC	11	75279634	.	G	GCTCTATAGCTGGGCC	G	NA	PASS			c.-168_-154dupCTATAGCTGGGCCCT	5' UTR		3	30934	0	0.09698	3	8716	0	0	302	0	0	1622	0	0	3490	0	0	14984	0	0	838	0	0	982	0	0	0	0	NA	TRUE	Transcript	INTRONIC	2	intron,feature_elongation	0.58	0.03
11_75279654_A_G	11	75279654	.	A	G	G	NA	PASS			c.-151A>G	5' UTR		2	30904	0	0.06472	2	8712	0	0	298	0	0	1620	0	0	3492	0	0	14964	0	0	838	0	0	980	0	0	0	0	FALSE	TRUE	Transcript	INTRONIC	2	intron	0.56	0.01
11_75279670_C_A	11	75279670	.	C	A	G	NA	PASS			c.-135C>A	5' UTR		1	30894	0	0.03237	1	8700	0	0	302	0	0	1622	0	0	3492	0	0	14958	0	0	838	0	0	982	0	0	0	0	TRUE	TRUE	Transcript	INTRONIC	2	intron	0.57	0.03
11_75279700_C_T	11	75279700	.	C	T	G	NA	PASS			c.-105C>T	5' UTR		3	30904	0	0.09707	3	8700	0	0	302	0	0	1622	0	0	3492	0	0	14968	0	0	838	0	0	982	0	0	0	0	FALSE	FALSE	Transcript	INTRONIC	2	intron	0.58	0.03
11_75279703_G_T	11	75279703	.	G	T	G	NA	PASS			c.-102G>T	5' UTR		3	30940	0	0.09696	0	8710	0	2	302	0	0	1622	0	0	3492	0	1	14994	0	0	838	0	0	982	0	0	0	0	TRUE	TRUE	Transcript	INTRONIC	2	intron	0.57	0.03
11_75279709_C_T	11	75279709	.	C	T	G	NA	PASS			c.-96C>T	5' UTR		1	30914	0	0.03235	0	8704	0	0	302	0	1	1620	0	0	3494	0	0	14982	0	0	838	0	0	974	0	0	0	0	FALSE	TRUE	Transcript	INTRONIC	2	intron	0.57	0.03
11_75279733_G_T	11	75279733	.	G	T	E	PASS	NA			c.-72G>T	5' UTR		1	242634	0	0.004121	0	14888	0	0	9806	0	0	17148	0	0	21562	0	0	110230	0	0	33294	0	1	5430	0	0	30276	0	TRUE	TRUE	Transcript	INTRONIC	2	intron	0.55	0.03
11_75279734_G_A	11	75279734	rs777193859	G	A	G	NA	PASS			c.-71G>A	5' UTR		1	30914	0	0.03235	0	8704	0	0	302	0	1	1618	0	0	3492	0	0	14980	0	0	838	0	0	980	0	0	0	0	FALSE	TRUE	Transcript	INTRONIC	2	intron	0.55	0.03
11_75279734_G_T	11	75279734	rs777193859	G	T	E	PASS	NA			c.-71G>T	5' UTR		4	242798	0	0.01647	0	14910	0	4	9802	0	0	17144	0	0	21576	0	0	110322	0	0	33316	0	0	5438	0	0	30290	0	TRUE	TRUE	Transcript	INTRONIC	2	intron	0.55	0.03
11_75279735_C_T	11	75279735	rs769770929	C	T	E	PASS	NA			c.-70C>T	5' UTR		6	242734	0	0.02472	0	14926	0	0	9806	0	0	17134	0	0	21578	0	4	110294	0	0	33312	0	0	5426	0	2	30258	0	FALSE	TRUE	Transcript	INTRONIC	2	intron	0.55	0.03
11_75279736_G_A	11	75279736	rs765845876	G	A	E	PASS	NA			c.-69G>A	5' UTR		5	243730	0	0.02051	0	15038	0	0	9812	0	1	17160	0	0	21698	0	1	110752	0	0	33372	0	0	5444	0	3	30454	0	FALSE	TRUE	Transcript	INTRONIC	2	intron	0.55	0.03
11_75279736_G_C	11	75279736	rs765845876	G	C	E	PASS	NA			c.-69G>C	5' UTR		6	243730	0	0.02462	0	15038	0	0	9812	0	6	17160	0	0	21698	0	0	110752	0	0	33372	0	0	5444	0	0	30454	0	TRUE	TRUE	Transcript	INTRONIC	2	intron	0.55	0.03
11_75279738_C_T	11	75279738	rs376768493	C	T	E	PASS	NA			c.-67C>T	5' UTR		27	244276	0	0.0001105	0	15112	0	0	9826	0	0	17198	0	1	21824	0	25	110956	0	0	33430	0	1	5448	0	0	30482	0	FALSE	TRUE	Transcript	INTRONIC	2	intron	0.55	0.03
11_75279740_A_G	11	75279740	.	A	G	G	NA	PASS			c.-65A>G	5' UTR		1	30936	0	0.03232	1	8716	0	0	302	0	0	1620	0	0	3492	0	0	14988	0	0	838	0	0	980	0	0	0	0	FALSE	TRUE	Transcript	INTRONIC	2	intron	0.54	0.03
11_75279751_A_C	11	75279751	.	A	C	E	PASS	NA			c.-54A>C	5' UTR		1	245698	0	4.07e-6	0	15260	0	0	9846	0	0	17246	0	1	22112	0	0	111506	0	0	33554	0	0	5472	0	0	30702	0	TRUE	TRUE	Transcript	INTRONIC	2	intron	0.55	0.04
11_75279756_G_A	11	75279756	rs764336626	G	A	E	PASS	NA			c.-49G>A	5' UTR		5	245912	0	0.02033	0	15284	0	0	9850	0	0	17248	0	0	22176	0	5	111570	0	0	33562	0	0	5480	0	0	30742	0	FALSE	TRUE	Transcript	INTRONIC	2	intron	0.55	0.04
11_75279756_G_C	11	75279756	rs764336626	G	C	E	PASS	NA			c.-49G>C	5' UTR		1	245912	0	0.004066	0	15284	0	0	9850	0	0	17248	0	0	22176	0	1	111570	0	0	33562	0	0	5480	0	0	30742	0	TRUE	TRUE	Transcript	INTRONIC	2	intron	0.55	0.04
11_75279763_G_A	11	75279763	.	G	A	G	NA	PASS			c.-42G>A	5' UTR		1	30926	0	0.03234	1	8710	0	0	302	0	0	1620	0	0	3494	0	0	14984	0	0	836	0	0	980	0	0	0	0	FALSE	TRUE	Transcript	INTRONIC	2	intron	0.57	0.05
11_75279764_C_A	11	75279764	.	C	A	G	NA	PASS			c.-41C>A	5' UTR		1	30922	0	0.03234	1	8716	0	0	302	0	0	1618	0	0	3492	0	0	14976	0	0	838	0	0	980	0	0	0	0	TRUE	TRUE	Transcript	INTRONIC	2	intron	0.58	0.05
11_75279766_C_T	11	75279766	rs751699952	C	T	E	PASS	NA			c.-39C>T	5' UTR		1	246090	0	0.004064	0	15294	0	0	9850	0	0	17246	0	0	22238	0	1	111638	0	0	33576	0	0	5486	0	0	30762	0	FALSE	TRUE	Transcript	INTRONIC	2	intron	0.58	0.05
11_75279768_A_C	11	75279768	rs550785236	A	C	G	NA	PASS	c.623-8A>C		c.623-8A>C	splice region		1	30934	0	0.03233	0	8716	0	0	302	0	1	1620	0	0	3494	0	0	14986	0	0	838	0	0	978	0	0	0	0	TRUE	TRUE	Transcript	SPLICE_SITE	5	splice,intron	0.57	0.05
11_75279769_A_G	11	75279769	.	A	G	E	PASS	NA	c.623-7A>G		c.623-7A>G	splice region		1	246156	0	0.004062	0	15300	0	0	9850	0	0	17248	0	0	22252	0	0	111670	0	0	33578	0	0	5484	0	1	30774	0	FALSE	TRUE	Transcript	SPLICE_SITE	5	splice,intron	0.56	0.05
11_75279770_C_G	11	75279770	rs757544884	C	G	E	PASS	NA	c.623-6C>G		c.623-6C>G	splice region		1	246146	0	0.004063	0	15296	0	0	9850	0	1	17248	0	0	22252	0	0	111670	0	0	33572	0	0	5484	0	0	30774	0	TRUE	TRUE	Transcript	SPLICE_SITE	5	splice,intron	0.57	0.05
11_75279772_A_G	11	75279772	.	A	G	E	PASS	NA	c.623-4A>G		c.623-4A>G	splice region		1	246170	0	0.004062	0	15300	0	0	9850	0	0	17248	0	0	22268	0	0	111672	0	0	33574	0	0	5484	0	1	30774	0	FALSE	TRUE	Transcript	SPLICE_SITE	5	splice,intron	0.57	0.07
11_75279773_C_T	11	75279773	rs780947291	C	T	E G	PASS	PASS	c.623-3C>T		c.623-3C>T	splice region		7	277108	0	0.02526	0	24012	0	0	10152	0	7	18868	0	0	25760	0	0	126666	0	0	34414	0	0	6464	0	0	30772	0	FALSE	TRUE	Transcript	SPLICE_SITE	5	splice,intron	0.57	0.07
11_75279775_G_A	11	75279775	rs750282634	G	A	E	PASS	NA	c.623-1G>A		c.623-1G>A	splice acceptor		1	246170	0	0.004062	0	15298	0	0	9850	0	0	17248	0	0	22264	0	1	111674	0	0	33576	0	0	5484	0	0	30776	0	FALSE	TRUE	Transcript	CANONICAL_SPLICE	6	splice_acceptor	0.57	0.07
11_75279778_C_T	11	75279778	rs755976024	C	T	E	PASS	NA	p.His209Tyr	p.His209Tyr	c.625C>T	missense		3	246192	0	0.01219	0	15304	0	0	9848	0	0	17248	0	0	22270	0	1	111680	0	1	33578	0	1	5486	0	0	30778	0	FALSE	TRUE	CodingTranscript	NON_SYNONYMOUS	7	missense,splice	0.56	0.05
11_75279780_C_G	11	75279780	rs569867446	C	G	E G	PASS	PASS	p.His209Gln	p.His209Gln	c.627C>G	missense		3	277146	0	0.01082	0	24016	0	0	10152	0	3	18868	0	0	25768	0	0	126684	0	0	34418	0	0	6462	0	0	30778	0	TRUE	TRUE	CodingTranscript	NON_SYNONYMOUS	7	missense	0.56	0.05
11_75279795_C_T	11	75279795	.	C	T	E	PASS	NA	p.Phe214Phe	p.Phe214Phe	c.642C>T	synonymous		1	246244	0	0.004061	0	15304	0	0	9850	0	0	17248	0	0	22290	0	1	111706	0	0	33580	0	0	5486	0	0	30780	0	FALSE	TRUE	CodingTranscript	SYNONYMOUS	5	synonymous	0.54	0.07
11_75279804_G_T	11	75279804	.	G	T	E G	PASS	PASS	p.Lys217Asn	p.Lys217Asn	c.651G>T	missense		3	277194	0	0.01082	0	24026	0	0	10152	0	0	18868	0	0	25778	0	2	126706	0	0	34418	0	1	6464	0	0	30782	0	TRUE	TRUE	CodingTranscript	NON_SYNONYMOUS	7	missense	0.56	0.07
11_75279805_A_G	11	75279805	.	A	G	E G	PASS	RF	p.Met1?â€	p.Met1?	c.1A>G	start lost		1	246256	0	0.004061	0	15304	0	0	9850	0	0	17248	0	0	22292	0	0	111714	0	0	33582	0	0	5486	0	1	30780	0	FALSE	TRUE	CodingTranscript	NON_SYNONYMOUS	7	missense	0.56	0.07
11_75279808_G_A	11	75279808	.	G	A	E	PASS	NA	p.Val219Met	p.Val219Met	c.655G>A	missense		1	246244	0	0.004061	0	15304	0	0	9850	0	0	17248	0	0	22288	0	0	111710	0	0	33580	0	0	5484	0	1	30780	0	FALSE	TRUE	CodingTranscript	NON_SYNONYMOUS	7	missense	0.55	0.07
11_75279810_G_A	11	75279810	rs748795204	G	A	E	PASS	NA	p.Val219Val	p.Val219Val	c.657G>A	synonymous		2	246252	0	0.008122	0	15304	0	0	9850	0	0	17248	0	0	22292	0	0	111712	0	2	33580	0	0	5486	0	0	30780	0	FALSE	TRUE	CodingTranscript	SYNONYMOUS	5	synonymous	0.54	0.07
11_75279813_C_T	11	75279813	rs768024089	C	T	E	PASS	NA	p.Asp220Asp	p.Asp220Asp	c.660C>T	synonymous		5	246256	0	2.03e-5	0	15304	0	0	9850	0	0	17248	0	0	22292	0	0	111712	0	0	33582	0	0	5486	0	5	30782	0	FALSE	TRUE	CodingTranscript	SYNONYMOUS	5	synonymous	0.54	0.05
11_75279814_A_G	11	75279814	rs778537327	A	G	E	PASS	NA	p.Asn221Asp	p.Asn221Asp	c.661A>G	missense		1	246260	0	0.004061	0	15304	0	0	9850	0	1	17248	0	0	22296	0	0	111712	0	0	33582	0	0	5486	0	0	30782	0	FALSE	TRUE	CodingTranscript	NON_SYNONYMOUS	7	missense	0.54	0.05
11_75279814_A_T	11	75279814	rs778537327	A	T	E	PASS	NA	p.Asn221Tyr	p.Asn221Tyr	c.661A>T	missense		1	246260	0	0.004061	0	15304	0	0	9850	0	0	17248	0	0	22296	0	1	111712	0	0	33582	0	0	5486	0	0	30782	0	TRUE	TRUE	CodingTranscript	NON_SYNONYMOUS	7	missense	0.54	0.05
11_75279817_C_A	11	75279817	rs747743316	C	A	E	PASS	NA	p.Arg222Ser	p.Arg222Ser	c.664C>A	missense		1	246254	0	0.004061	0	15304	0	0	9850	0	0	17248	0	0	22296	0	0	111706	0	0	33582	0	0	5486	0	1	30782	0	TRUE	TRUE	CodingTranscript	NON_SYNONYMOUS	7	missense	0.54	0.05
11_75279817_C_T	11	75279817	rs747743316	C	T	E	PASS	NA	p.Arg222Cys	p.Arg222Cys	c.664C>T	missense		2	246254	0	0.008122	0	15304	0	1	9850	0	0	17248	0	0	22296	0	0	111706	0	0	33582	0	0	5486	0	1	30782	0	FALSE	TRUE	CodingTranscript	NON_SYNONYMOUS	7	missense	0.54	0.05
11_75279818_G_A	11	75279818	rs771916875	G	A	E	PASS	NA	p.Arg222His	p.Arg222His	c.665G>A	missense		2	246252	0	0.008122	1	15302	0	0	9850	0	0	17248	0	0	22292	0	0	111710	0	0	33582	0	0	5486	0	1	30782	0	FALSE	TRUE	CodingTranscript	NON_SYNONYMOUS	7	missense	0.54	0.05
11_75279826_A_G	11	75279826	.	A	G	E	PASS	NA	p.Met225Val	p.Met225Val	c.673A>G	missense		1	246264	0	0.004061	0	15304	0	0	9850	0	0	17248	0	0	22296	0	1	111716	0	0	33582	0	0	5486	0	0	30782	0	FALSE	TRUE	CodingTranscript	NON_SYNONYMOUS	7	missense	0.54	0.05
11_75279829_G_A	11	75279829	.	G	A	E	PASS	NA	p.Val226Met	p.Val226Met	c.676G>A	missense		1	246262	0	0.004061	1	15304	0	0	9850	0	0	17248	0	0	22296	0	0	111714	0	0	33582	0	0	5486	0	0	30782	0	FALSE	TRUE	CodingTranscript	NON_SYNONYMOUS	7	missense	0.54	0.05
11_75279831_G_A	11	75279831	rs369251719	G	A	E G	PASS	RF	p.Val226Val	p.Val226Val	c.678G>A	synonymous		1	246262	0	0.004061	0	15304	0	0	9850	0	0	17248	0	0	22296	0	1	111714	0	0	33582	0	0	5486	0	0	30782	0	FALSE	TRUE	CodingTranscript	SYNONYMOUS	5	synonymous	0.54	0.05
11_75279836_G_A	11	75279836	rs759994312	G	A	E	PASS	NA	p.Arg228Gln	p.Arg228Gln	c.683G>A	missense		5	246262	0	2.03e-5	0	15304	0	0	9850	0	1	17246	0	0	22294	0	2	111718	0	0	33582	0	1	5486	0	1	30782	0	FALSE	TRUE	CodingTranscript	NON_SYNONYMOUS	7	missense	0.56	0.05
11_75279842_A_G	11	75279842	.	A	G	E G	PASS	RF	p.Tyr230Cys	p.Tyr230Cys	c.689A>G	missense		1	246266	0	0.004061	0	15304	0	0	9850	0	0	17248	0	0	22298	0	1	111716	0	0	33582	0	0	5486	0	0	30782	0	FALSE	TRUE	CodingTranscript	NON_SYNONYMOUS	7	missense	0.56	0.05
11_75279843_T_C	11	75279843	.	T	C	E G	PASS	PASS	p.Tyr230Tyr	p.Tyr230Tyr	c.690T>C	synonymous		4	277178	0	0.01443	0	24022	0	1	10150	0	0	18866	0	0	25790	0	3	126686	0	0	34420	0	0	6462	0	0	30782	0	FALSE	TRUE	CodingTranscript	SYNONYMOUS	5	synonymous	0.56	0.05
11_75279846_C_T	11	75279846	rs649257	C	T	E G	PASS	PASS	p.Thr231Thr	p.Thr231Thr	c.693C>T	synonymous		96134	276940	17576	0.3471	10748	23956	2430	3024	10148	477	3534	18854	340	9626	25770	1805	39575	126566	6217	12809	34410	2390	2253	6458	389	14565	30778	3528	FALSE	TRUE	CodingTranscript	SYNONYMOUS	5	synonymous	0.56	0.05
11_75279847_G_A	11	75279847	rs534696801	G	A	E	PASS	NA	p.Val232Met	p.Val232Met	c.694G>A	missense		3	246234	0	0.01218	0	15296	0	0	9850	0	1	17248	0	0	22296	0	2	111704	0	0	33578	0	0	5486	0	0	30776	0	FALSE	TRUE	CodingTranscript	NON_SYNONYMOUS	7	missense	0.57	0.05
11_75279848_T_G	11	75279848	rs763555596	T	G	E	PASS	NA	p.Val232Gly	p.Val232Gly	c.695T>G	missense		2	246236	0	0.008122	2	15296	0	0	9850	0	0	17248	0	0	22298	0	0	111706	0	0	33578	0	0	5486	0	0	30774	0	TRUE	TRUE	CodingTranscript	NON_SYNONYMOUS	7	missense	0.57	0.05
11_75279858_G_C	11	75279858	rs764058290	G	C	E	PASS	NA	p.Met235Ile	p.Met235Ile	c.705G>C	missense		1	246262	0	0.004061	0	15304	0	0	9850	0	0	17248	0	0	22298	0	1	111712	0	0	33582	0	0	5486	0	0	30782	0	TRUE	TRUE	CodingTranscript	NON_SYNONYMOUS	7	missense	0.56	0.05
11_75279858_G_T	11	75279858	rs764058290	G	T	E	PASS	NA	p.Met235Ile	p.Met235Ile	c.705G>T	missense		1	246262	0	0.004061	0	15304	0	0	9850	0	0	17248	0	0	22298	0	1	111712	0	0	33582	0	0	5486	0	0	30782	0	TRUE	TRUE	CodingTranscript	NON_SYNONYMOUS	7	missense	0.56	0.05
11_75279864_G_A	11	75279864	.	G	A	E	PASS	NA	p.Met237Ile	p.Met237Ile	c.711G>A	missense		1	246252	0	0.004061	0	15304	0	0	9850	0	0	17248	0	1	22288	0	0	111714	0	0	33582	0	0	5484	0	0	30782	0	FALSE	TRUE	CodingTranscript	NON_SYNONYMOUS	7	missense	0.57	0.05
11_75279867_C_A	11	75279867	rs761932276	C	A	E	PASS	NA	p.His238Gln	p.His238Gln	c.714C>A	missense		1	246254	0	0.004061	0	15302	0	0	9850	0	0	17248	0	0	22294	0	1	111714	0	0	33580	0	0	5486	0	0	30780	0	TRUE	TRUE	CodingTranscript	NON_SYNONYMOUS	7	missense	0.58	0.05
11_75279868_C_T	11	75279868	rs767729275	C	T	E	PASS	NA	p.Arg239Trp	p.Arg239Trp	c.715C>T	missense		2	246248	0	0.008122	0	15304	0	0	9850	0	1	17248	0	0	22290	0	1	111706	0	0	33582	0	0	5486	0	0	30782	0	FALSE	TRUE	CodingTranscript	NON_SYNONYMOUS	7	missense	0.58	0.05
11_75279869_G_A	11	75279869	rs750157727	G	A	E G	PASS	PASS	p.Arg239Gln	p.Arg239Gln	c.716G>A	missense		5	277158	0	0.01804	0	24018	0	0	10150	0	4	18870	0	0	25782	0	1	126672	0	0	34420	0	0	6464	0	0	30782	0	FALSE	TRUE	CodingTranscript	NON_SYNONYMOUS	7	missense	0.59	0.05
11_75279883_T_C	11	75279883	rs138193444	T	C	E G	PASS	PASS			c.721+9T>C	intron		140	277114	0	0.0005052	98	24010	0	0	10148	0	0	18870	0	0	25776	0	16	126644	0	20	34418	0	5	6466	0	1	30782	0	FALSE	TRUE	Transcript	INTRONIC	2	intron	0.61	0.05
11_75279892_C_A	11	75279892	.	C	A	E	PASS	NA			c.721+18C>A	intron		1	246196	0	0.004062	0	15302	0	0	9850	0	0	17246	0	0	22276	0	1	111682	0	0	33574	0	0	5486	0	0	30780	0	TRUE	TRUE	Transcript	INTRONIC	2	intron	0.60	0.05
11_75279892_C_G	11	75279892	.	C	G	E	PASS	NA			c.721+18C>G	intron		1	246196	0	0.004062	0	15302	0	0	9850	0	0	17246	0	0	22276	0	0	111682	0	1	33574	0	0	5486	0	0	30780	0	TRUE	TRUE	Transcript	INTRONIC	2	intron	0.60	0.05
11_75279893_A_C	11	75279893	.	A	C	E	PASS	NA			c.721+19A>C	intron		2	246200	0	0.008123	0	15302	0	0	9850	0	2	17248	0	0	22270	0	0	111686	0	0	33576	0	0	5486	0	0	30782	0	TRUE	TRUE	Transcript	INTRONIC	2	intron	0.60	0.04
11_75279894_G_C	11	75279894	.	G	C	E	PASS	NA			c.721+20G>C	intron		1	246190	0	0.004062	0	15304	0	0	9850	0	0	17248	0	0	22266	0	1	111678	0	0	33576	0	0	5486	0	0	30782	0	TRUE	TRUE	Transcript	INTRONIC	2	intron	0.60	0.04
11_75279896_G_T	11	75279896	rs779867183	G	T	E	PASS	NA			c.721+22G>T	intron		1	246194	0	0.004062	0	15304	0	0	9850	0	0	17248	0	0	22266	0	1	111686	0	0	33576	0	0	5484	0	0	30780	0	TRUE	TRUE	Transcript	INTRONIC	2	intron	0.60	0.05
11_75279906_G_C	11	75279906	.	G	C	E	PASS	NA			c.721+32G>C	intron		1	246118	0	0.004063	0	15300	0	0	9850	0	0	17248	0	0	22228	0	0	111652	0	0	33578	0	0	5482	0	1	30780	0	TRUE	TRUE	Transcript	INTRONIC	2	intron	0.62	0.05
11_75279908_G_A	11	75279908	rs201156258	G	A	E	PASS	NA			c.721+34G>A	intron		2	246136	0	0.008126	0	15304	0	0	9848	0	0	17248	0	0	22230	0	0	111662	0	2	33580	0	0	5482	0	0	30782	0	FALSE	TRUE	Transcript	INTRONIC	2	intron	0.62	0.05
11_75279909_T_C	11	75279909	rs755002360	T	C	E	PASS	NA			c.721+35T>C	intron		1	246118	0	0.004063	0	15302	0	0	9846	0	0	17248	0	0	22232	0	0	111652	0	0	33576	0	0	5480	0	1	30782	0	FALSE	TRUE	Transcript	INTRONIC	2	intron	0.62	0.05
11_75279909_T_G	11	75279909	rs755002360	T	G	E	PASS	NA			c.721+35T>G	intron		1	246118	0	0.004063	0	15302	0	0	9846	0	0	17248	0	0	22232	0	1	111652	0	0	33576	0	0	5480	0	0	30782	0	TRUE	TRUE	Transcript	INTRONIC	2	intron	0.62	0.05
11_75279912_G_A	11	75279912	.	G	A	G	NA	PASS			c.721+38G>A	intron		1	30898	0	0.03236	1	8702	0	0	302	0	0	1620	0	0	3492	0	0	14964	0	0	838	0	0	980	0	0	0	0	FALSE	TRUE	Transcript	INTRONIC	2	intron	0.62	0.04
11_75279912_G_T	11	75279912	.	G	T	E	PASS	NA			c.721+38G>T	intron		1	246064	0	0.004064	0	15296	0	0	9844	0	1	17248	0	0	22204	0	0	111634	0	0	33578	0	0	5478	0	0	30782	0	TRUE	TRUE	Transcript	INTRONIC	2	intron	0.62	0.04
11_75279913_G_T	11	75279913	rs534877216	G	T	E	PASS	NA			c.721+39G>T	intron		9	246074	0	0.03657	0	15298	0	0	9846	0	8	17248	0	0	22206	0	0	111638	0	0	33578	0	1	5482	0	0	30778	0	TRUE	TRUE	Transcript	INTRONIC	2	intron	0.62	0.04
11_75279919_A_G	11	75279919	rs747699553	A	G	E	PASS	NA			c.721+45A>G	intron		1	246020	0	0.004065	0	15292	0	0	9846	0	1	17244	0	0	22200	0	0	111614	0	0	33574	0	0	5482	0	0	30768	0	FALSE	TRUE	Transcript	INTRONIC	2	intron	0.62	0.04
11_75279919_A_T	11	75279919	rs747699553	A	T	E	PASS	NA			c.721+45A>T	intron		1	246020	0	0.004065	0	15292	0	0	9846	0	0	17244	0	0	22200	0	1	111614	0	0	33574	0	0	5482	0	0	30768	0	TRUE	TRUE	Transcript	INTRONIC	2	intron	0.62	0.04
11_75279925_G_C	11	75279925	rs771794001	G	C	E	PASS	NA			c.721+51G>C	intron		1	246012	0	0.004065	0	15296	0	0	9848	0	0	17242	0	0	22170	0	1	111630	0	0	33570	0	0	5478	0	0	30778	0	TRUE	TRUE	Transcript	INTRONIC	2	intron	0.60	0.03
11_75279934_A_C	11	75279934	rs777590062	A	C	E	PASS	NA			c.722-50A>C	intron		1	245940	0	0.004066	0	15290	0	0	9840	0	0	17242	0	0	22132	0	1	111608	0	0	33572	0	0	5476	0	0	30780	0	TRUE	TRUE	Transcript	INTRONIC	2	intron	0.61	0.07
11_75279938_A_C	11	75279938	rs746193011	A	C	E	PASS	NA			c.722-46A>C	intron		10	245936	0	0.04066	0	15300	0	0	9848	0	0	17246	0	0	22094	0	0	111618	0	8	33570	0	2	5478	0	0	30782	0	TRUE	TRUE	Transcript	INTRONIC	2	intron	0.62	0.07
11_75279941_C_A	11	75279941	.	C	A	E	PASS	NA			c.722-43C>A	intron		1	245946	0	0.004066	0	15300	0	0	9848	0	0	17246	0	0	22100	0	0	111616	0	1	33576	0	0	5478	0	0	30782	0	TRUE	TRUE	Transcript	INTRONIC	2	intron	0.60	0.07
11_75279942_C_G	11	75279942	rs770252640	C	G	E	PASS	NA			c.722-42C>G	intron		1	245964	0	0.004066	0	15298	0	0	9848	0	0	17248	0	0	22108	0	0	111624	0	1	33576	0	0	5480	0	0	30782	0	TRUE	TRUE	Transcript	INTRONIC	2	intron	0.60	0.07
11_75279943_T_C	11	75279943	rs775971073	T	C	E	PASS	NA			c.722-41T>C	intron		1	245966	0	0.004066	0	15304	0	0	9848	0	0	17248	0	0	22094	0	1	111636	0	0	33574	0	0	5480	0	0	30782	0	FALSE	TRUE	Transcript	INTRONIC	2	intron	0.60	0.07
11_75279953_G_A	11	75279953	.	G	A	E	PASS	NA			c.722-31G>A	intron		1	245958	0	0.004066	0	15300	0	0	9846	0	0	17248	0	0	22068	0	1	111652	0	0	33580	0	0	5482	0	0	30782	0	FALSE	TRUE	Transcript	INTRONIC	2	intron	0.60	0.07
11_75279955_G_C	11	75279955	rs763351865	G	C	E	PASS	NA			c.722-29G>C	intron		1	245922	0	0.004066	0	15302	0	0	9846	0	0	17246	0	0	22026	0	0	111660	0	0	33580	0	0	5482	0	1	30780	0	TRUE	TRUE	Transcript	INTRONIC	2	intron	0.59	0.07
11_75279956_C_G	11	75279956	.	C	G	E G	PASS	PASS			c.722-28C>G	intron		2	276846	0	0.007224	0	24002	0	0	10146	0	0	18870	0	1	25544	0	0	126620	0	0	34420	0	1	6462	0	0	30782	0	TRUE	TRUE	Transcript	INTRONIC	2	intron	0.60	0.07
11_75279960_G_A	11	75279960	.	G	A	E	PASS	NA			c.722-24G>A	intron		1	245960	0	0.004066	0	15304	0	0	9846	0	0	17248	0	0	22040	0	0	111676	0	1	33582	0	0	5482	0	0	30782	0	FALSE	TRUE	Transcript	INTRONIC	2	intron	0.58	0.07
11_75279964_C_G	11	75279964	.	C	G	E	PASS	NA			c.722-20C>G	intron		2	245910	0	0.008133	0	15304	0	0	9848	0	2	17248	0	0	21990	0	0	111674	0	0	33582	0	0	5482	0	0	30782	0	TRUE	TRUE	Transcript	INTRONIC	2	intron	0.60	0.07
11_75279965_C_T	11	75279965	.	C	T	E	PASS	NA			c.722-19C>T	intron		1	245918	0	0.004066	0	15302	0	0	9848	0	1	17248	0	0	22002	0	0	111674	0	0	33582	0	0	5482	0	0	30780	0	FALSE	TRUE	Transcript	INTRONIC	2	intron	0.60	0.07
11_75279969_C_T	11	75279969	.	C	T	E	PASS	NA			c.722-15C>T	intron		2	245890	0	0.008134	0	15302	0	0	9848	0	0	17248	0	0	21982	0	2	111664	0	0	33582	0	0	5482	0	0	30782	0	FALSE	TRUE	Transcript	INTRONIC	2	intron	0.60	0.07
11_75279970_C_T	11	75279970	.	C	T	G	NA	PASS			c.722-14C>T	intron		1	30900	0	0.03236	0	8710	0	0	302	0	0	1620	0	0	3492	0	1	14960	0	0	838	0	0	978	0	0	0	0	FALSE	TRUE	Transcript	INTRONIC	2	intron	0.60	0.07
11_75279971_G_A	11	75279971	rs116506210	G	A	E G	PASS	PASS			c.722-13G>A	intron		254	276762	0	0.0009178	140	24014	0	31	10150	0	0	18866	0	0	25482	0	18	126588	0	54	34420	0	8	6460	0	3	30782	0	FALSE	TRUE	Transcript	INTRONIC	2	intron	0.60	0.07
11_75279972_C_T	11	75279972	rs774226247	C	T	E	PASS	NA			c.722-12C>T	intron		1	245918	0	0.004066	0	15302	0	0	9848	0	0	17248	0	0	22010	0	0	111664	0	0	33582	0	0	5482	0	1	30782	0	FALSE	TRUE	Transcript	INTRONIC	2	intron	0.60	0.07
11_75279977_C_T	11	75279977	.	C	T	E	PASS	NA	c.722-7C>T		c.722-7C>T	splice region		1	245950	0	0.004066	0	15302	0	0	9850	0	0	17248	0	0	22018	0	0	111686	0	0	33582	0	0	5482	0	1	30782	0	FALSE	TRUE	Transcript	SPLICE_SITE	5	splice,intron	0.60	0.07
11_75279979_C_T	11	75279979	.	C	T	E	PASS	NA	c.722-5C>T		c.722-5C>T	splice region		1	245968	0	0.004066	0	15302	0	0	9850	0	0	17248	0	0	22028	0	1	111692	0	0	33582	0	0	5484	0	0	30782	0	FALSE	TRUE	Transcript	SPLICE_SITE	5	splice,intron	0.60	0.07
11_75279981_C_G	11	75279981	rs761892171	C	G	E	PASS	NA	c.722-3C>G		c.722-3C>G	splice region		1	245966	0	0.004066	0	15302	0	0	9848	0	0	17248	0	0	22036	0	1	111684	0	0	33582	0	0	5484	0	0	30782	0	TRUE	TRUE	Transcript	SPLICE_SITE	5	splice,intron	0.60	0.07
11_75279981_C_T	11	75279981	rs761892171	C	T	E	PASS	NA	c.722-3C>T		c.722-3C>T	splice region		1	245966	0	0.004066	0	15302	0	0	9848	0	0	17248	0	0	22036	0	0	111684	0	0	33582	0	0	5484	0	1	30782	0	FALSE	TRUE	Transcript	SPLICE_SITE	5	splice,intron	0.60	0.07
11_75279984_G_T	11	75279984	rs767688879	G	T	E	PASS	NA	p.Gly241Val	p.Gly241Val	c.722G>T	missense		3	245950	0	1.22e-5	0	15302	0	3	9848	0	0	17248	0	0	22022	0	0	111682	0	0	33582	0	0	5484	0	0	30782	0	TRUE	TRUE	CodingTranscript	NON_SYNONYMOUS	7	missense,splice	0.60	0.07
11_75279985_C_A	11	75279985	.	C	A	E	PASS	NA	c.723C>A	p.Gly241Gly	c.723C>A	splice region		1	245988	0	0.004065	0	15302	0	0	9848	0	0	17248	0	0	22056	0	0	111686	0	1	33582	0	0	5484	0	0	30782	0	TRUE	TRUE	CodingTranscript	SPLICE_SITE	5	splice,synonymous	0.60	0.07
11_75279986_C_T	11	75279986	.	C	T	E	PASS	NA	p.Leu242Phe	p.Leu242Phe	c.724C>T	missense		1	246008	0	0.004065	0	15302	0	1	9848	0	0	17248	0	0	22066	0	0	111696	0	0	33582	0	0	5484	0	0	30782	0	FALSE	TRUE	CodingTranscript	NON_SYNONYMOUS	7	missense,splice	0.60	0.07
11_75279993_A_C	11	75279993	rs773393677	A	C	E	PASS	NA	p.Asn244Thr	p.Asn244Thr	c.731A>C	missense		1	246028	0	0.004065	0	15304	0	0	9850	0	0	17248	0	0	22088	0	1	111690	0	0	33582	0	0	5484	0	0	30782	0	TRUE	TRUE	CodingTranscript	NON_SYNONYMOUS	7	missense	0.58	0.07
11_75279993_A_G	11	75279993	rs773393677	A	G	E	PASS	NA	p.Asn244Ser	p.Asn244Ser	c.731A>G	missense		4	246028	0	0.01626	0	15304	0	0	9850	0	0	17248	0	0	22088	0	4	111690	0	0	33582	0	0	5484	0	0	30782	0	FALSE	TRUE	CodingTranscript	NON_SYNONYMOUS	7	missense	0.58	0.07
11_75279994_C_T	11	75279994	.	C	T	E	PASS	NA	p.Asn244Asn	p.Asn244Asn	c.732C>T	synonymous		2	246030	0	0.008129	0	15304	0	0	9850	0	0	17248	0	0	22086	0	0	111694	0	0	33582	0	0	5484	0	2	30782	0	FALSE	TRUE	CodingTranscript	SYNONYMOUS	5	synonymous	0.58	0.07
11_75279998_TACG_T	11	75279998	rs757480118	TACG	T	E	PASS	NA	p.Asp248del	p.Asp248del	c.744_746delCGA	inframe deletion		1	246014	0	0.004065	0	15302	0	0	9848	0	0	17248	0	0	22072	0	1	111696	0	0	33582	0	0	5484	0	0	30782	0	NA	TRUE	CodingTranscript	INFRAME	7	inframe_deletion	0.58	0.06
11_75280000_C_T	11	75280000	rs199681690	C	T	E	PASS	NA	p.Tyr246Tyr	p.Tyr246Tyr	c.738C>T	synonymous		5	245996	0	0.02033	0	15302	0	0	9848	0	0	17248	0	0	22050	0	4	111698	0	1	33582	0	0	5486	0	0	30782	0	FALSE	TRUE	CodingTranscript	SYNONYMOUS	5	synonymous	0.58	0.07
11_75280001_G_A	11	75280001	rs753734711	G	A	E G	PASS	PASS	p.Asp247Asn	p.Asp247Asn	c.739G>A	missense		6	276958	0	0.02166	0	24016	0	0	10148	0	0	18870	0	0	25576	0	5	126678	0	0	34420	0	1	6468	0	0	30782	0	FALSE	TRUE	CodingTranscript	NON_SYNONYMOUS	7	missense	0.58	0.07
11_75280003_C_T	11	75280003	rs149910134	C	T	E G	PASS	PASS	p.Asp247Asp	p.Asp247Asp	c.741C>T	synonymous		8	276994	0	0.02888	1	24026	0	0	10152	0	0	18870	0	0	25596	0	7	126680	0	0	34420	0	0	6468	0	0	30782	0	FALSE	TRUE	CodingTranscript	SYNONYMOUS	5	synonymous	0.60	0.07
11_75280004_G_A	11	75280004	rs765236669	G	A	E	PASS	NA	p.Asp248Asn	p.Asp248Asn	c.742G>A	missense		5	246050	0	0.02032	1	15302	0	0	9848	0	3	17248	0	0	22104	0	1	111700	0	0	33582	0	0	5484	0	0	30782	0	FALSE	TRUE	CodingTranscript	NON_SYNONYMOUS	7	missense	0.60	0.07
11_75280004_G_C	11	75280004	rs765236669	G	C	E	PASS	NA	p.Asp248His	p.Asp248His	c.742G>C	missense		2	246050	0	0.008128	0	15302	0	0	9848	0	0	17248	0	0	22104	0	0	111700	0	0	33582	0	0	5484	0	2	30782	0	TRUE	TRUE	CodingTranscript	NON_SYNONYMOUS	7	missense	0.60	0.07
11_75280006_C_T	11	75280006	rs61733248	C	T	E G	PASS	PASS	p.Asp248Asp	p.Asp248Asp	c.744C>T	synonymous		948	277034	6	0.003422	10	24022	0	7	10150	0	2	18870	0	430	25636	5	429	126686	1	10	34420	0	25	6468	0	35	30782	0	FALSE	TRUE	CodingTranscript	SYNONYMOUS	5	synonymous	0.59	0.07
11_75280007_G_A	11	75280007	.	G	A	E	PASS	NA	p.Glu249Lys	p.Glu249Lys	c.745G>A	missense		1	246084	0	0.004064	1	15302	0	0	9850	0	0	17248	0	0	22132	0	0	111702	0	0	33582	0	0	5486	0	0	30782	0	FALSE	TRUE	CodingTranscript	NON_SYNONYMOUS	7	missense	0.59	0.07
11_75280007_G_C	11	75280007	.	G	C	E	PASS	NA	p.Glu249Gln	p.Glu249Gln	c.745G>C	missense		1	246084	0	0.004064	0	15302	0	0	9850	0	0	17248	0	0	22132	0	0	111702	0	1	33582	0	0	5486	0	0	30782	0	TRUE	TRUE	CodingTranscript	NON_SYNONYMOUS	7	missense	0.59	0.07
11_75280008_A_G	11	75280008	rs777463655	A	G	E	PASS	NA	p.Glu249Gly	p.Glu249Gly	c.746A>G	missense		1	246104	0	0.004063	1	15302	0	0	9850	0	0	17248	0	0	22148	0	0	111706	0	0	33582	0	0	5486	0	0	30782	0	FALSE	TRUE	CodingTranscript	NON_SYNONYMOUS	7	missense	0.59	0.07
11_75280013_G_A	11	75280013	rs553118941	G	A	E G	PASS	PASS	p.Glu251Lys	p.Glu251Lys	c.751G>A	missense		3	277048	0	0.01083	2	24018	0	0	10150	0	1	18870	0	0	25662	0	0	126678	0	0	34420	0	0	6468	0	0	30782	0	FALSE	TRUE	CodingTranscript	NON_SYNONYMOUS	7	missense	0.59	0.08
11_75280020_T_C	11	75280020	.	T	C	E	PASS	NA	p.Leu253Pro	p.Leu253Pro	c.758T>C	missense		1	246168	0	0.004062	0	15304	0	0	9850	0	0	17248	0	0	22210	0	1	111706	0	0	33582	0	0	5486	0	0	30782	0	FALSE	TRUE	CodingTranscript	NON_SYNONYMOUS	7	missense	0.58	0.08
11_75280022_C_G	11	75280022	rs757027235	C	G	E	PASS	NA	p.Gln254Glu	p.Gln254Glu	c.760C>G	missense		2	246168	0	0.008125	0	15304	0	0	9850	0	0	17248	0	0	22210	0	2	111706	0	0	33582	0	0	5486	0	0	30782	0	TRUE	TRUE	CodingTranscript	NON_SYNONYMOUS	7	missense	0.59	0.09
11_75280026_TC_T	11	75280026	.	TC	T	E	PASS	NA	p.Ile255MetfsTer31	p.Ile255MetfsTer31	c.765delC	frameshift		1	246180	0	0.004062	0	15304	0	0	9850	0	0	17248	0	0	22220	0	0	111708	0	0	33582	0	0	5486	0	1	30782	0	NA	TRUE	CodingTranscript	FRAME_SHIFT	7	frameshift,feature_truncation	0.60	0.11
11_75280027_C_T	11	75280027	rs369937589	C	T	E	PASS	NA	p.Ile255Ile	p.Ile255Ile	c.765C>T	synonymous		9	246176	0	0.03656	0	15304	0	0	9850	0	0	17248	0	0	22212	0	0	111712	0	9	33582	0	0	5486	0	0	30782	0	FALSE	TRUE	CodingTranscript	SYNONYMOUS	5	synonymous	0.60	0.11
11_75280028_G_A	11	75280028	rs749664592	G	A	E	PASS	NA	p.Val256Met	p.Val256Met	c.766G>A	missense		6	246178	0	0.02437	0	15304	0	0	9850	0	0	17248	0	0	22224	0	0	111704	0	0	33582	0	0	5486	0	6	30780	0	FALSE	TRUE	CodingTranscript	NON_SYNONYMOUS	7	missense	0.60	0.11
11_75280033_G_C	11	75280033	.	G	C	E	PASS	NA	p.Glu257Asp	p.Glu257Asp	c.771G>C	missense		3	246196	0	0.01219	0	15304	0	0	9850	0	0	17248	0	0	22236	0	3	111708	0	0	33582	0	0	5486	0	0	30782	0	TRUE	TRUE	CodingTranscript	NON_SYNONYMOUS	7	missense	0.58	0.11
11_75280036_G_A	11	75280036	.	G	A	E	PASS	NA	p.Met258Ile	p.Met258Ile	c.774G>A	missense		3	246190	0	0.01219	0	15304	0	0	9850	0	0	17248	0	0	22232	0	1	111706	0	1	33582	0	0	5486	0	1	30782	0	FALSE	TRUE	CodingTranscript	NON_SYNONYMOUS	7	missense	0.57	0.11
11_75280037_C_A	11	75280037	.	C	A	E	PASS	NA	p.Pro259Thr	p.Pro259Thr	c.775C>A	missense		1	246202	0	0.004062	0	15304	0	0	9850	0	0	17248	0	0	22240	0	0	111710	0	1	33582	0	0	5486	0	0	30782	0	TRUE	TRUE	CodingTranscript	NON_SYNONYMOUS	7	missense	0.58	0.11
11_75280038_C_T	11	75280038	rs768984519	C	T	E G	PASS	PASS	p.Pro259Leu	p.Pro259Leu	c.776C>T	missense		3	277150	0	0.01082	0	24024	0	0	10152	0	0	18868	0	0	25742	0	3	126696	0	0	34420	0	0	6466	0	0	30782	0	FALSE	TRUE	CodingTranscript	NON_SYNONYMOUS	7	missense	0.57	0.11
11_75280040_C_G	11	75280040	rs774942194	C	G	E	PASS	NA	p.Leu260Val	p.Leu260Val	c.778C>G	missense		3	246226	0	0.01218	1	15304	0	0	9850	0	0	17248	0	0	22258	0	2	111716	0	0	33582	0	0	5486	0	0	30782	0	TRUE	TRUE	CodingTranscript	NON_SYNONYMOUS	7	missense	0.58	0.11
11_75280043_G_A	11	75280043	rs748697715	G	A	E G	PASS	PASS	p.Ala261Thr	p.Ala261Thr	c.781G>A	missense		4	277154	0	0.01443	0	24030	0	0	10152	0	0	18870	0	0	25736	0	0	126698	0	4	34420	0	0	6466	0	0	30782	0	FALSE	TRUE	CodingTranscript	NON_SYNONYMOUS	7	missense	0.57	0.11
11_75280052_C_T	11	75280052	.	C	T	G	NA	PASS	p.Leu264Phe	p.Leu264Phe	c.790C>T	missense		1	30948	0	0.03231	1	8728	0	0	302	0	0	1622	0	0	3492	0	0	14984	0	0	838	0	0	982	0	0	0	0	FALSE	TRUE	CodingTranscript	NON_SYNONYMOUS	7	missense	0.56	0.09
11_75280054_C_T	11	75280054	.	C	T	E	PASS	NA	p.Leu264Leu	p.Leu264Leu	c.792C>T	synonymous		1	246242	0	0.004061	0	15304	0	0	9850	0	0	17248	0	0	22272	0	1	111718	0	0	33582	0	0	5486	0	0	30782	0	FALSE	TRUE	CodingTranscript	SYNONYMOUS	5	synonymous	0.56	0.09
11_75280059_G_C	11	75280059	rs772119590	G	C	E	PASS	NA	p.Ser266Thr	p.Ser266Thr	c.797G>C	missense		1	246240	0	0.004061	0	15304	0	0	9850	0	0	17248	0	0	22276	0	1	111712	0	0	33582	0	0	5486	0	0	30782	0	TRUE	TRUE	CodingTranscript	NON_SYNONYMOUS	7	missense	0.55	0.09
11_75280069_C_T	11	75280069	rs773342436	C	T	E	PASS	NA	p.Ile269Ile	p.Ile269Ile	c.807C>T	synonymous		2	246254	0	0.008122	0	15304	0	0	9850	0	0	17248	0	0	22284	0	2	111718	0	0	33582	0	0	5486	0	0	30782	0	FALSE	TRUE	CodingTranscript	SYNONYMOUS	5	synonymous	0.55	0.09
11_75280078_C_T	11	75280078	.	C	T	E	PASS	NA	p.Pro272Pro	p.Pro272Pro	c.816C>T	synonymous		1	246262	0	0.004061	0	15304	0	0	9850	0	0	17248	0	0	22292	0	0	111718	0	1	33582	0	0	5486	0	0	30782	0	FALSE	TRUE	CodingTranscript	SYNONYMOUS	5	synonymous	0.56	0.08
11_75280081_T_C	11	75280081	.	T	C	E	PASS	NA	p.His273His	p.His273His	c.819T>C	synonymous		2	246262	0	0.008121	1	15304	0	0	9850	0	0	17248	0	0	22292	0	0	111718	0	1	33582	0	0	5486	0	0	30782	0	FALSE	TRUE	CodingTranscript	SYNONYMOUS	5	synonymous	0.56	0.07
11_75280085_G_A	11	75280085	rs199679249	G	A	E G	PASS	PASS	p.Val275Met	p.Val275Met	c.823G>A	missense		13	277226	0	0.04689	1	24028	0	0	10152	0	0	18870	0	0	25788	0	7	126718	0	5	34420	0	0	6468	0	0	30782	0	FALSE	TRUE	CodingTranscript	NON_SYNONYMOUS	7	missense	0.54	0.05
11_75280085_G_T	11	75280085	rs199679249	G	T	E	PASS	NA	p.Val275Leu	p.Val275Leu	c.823G>T	missense		1	246264	0	0.004061	0	15304	0	0	9850	0	1	17248	0	0	22296	0	0	111716	0	0	33582	0	0	5486	0	0	30782	0	TRUE	TRUE	CodingTranscript	NON_SYNONYMOUS	7	missense	0.54	0.05
11_75280087_G_A	11	75280087	.	G	A	E	PASS	NA	p.Val275Val	p.Val275Val	c.825G>A	synonymous		2	246264	0	0.008121	0	15304	0	0	9850	0	0	17248	0	0	22296	0	0	111716	0	2	33582	0	0	5486	0	0	30782	0	FALSE	TRUE	CodingTranscript	SYNONYMOUS	5	synonymous	0.55	0.05
11_75280088_G_A	11	75280088	rs776233451	G	A	E	PASS	NA	p.Glu276Lys	p.Glu276Lys	c.826G>A	missense		1	246266	0	0.004061	0	15304	0	0	9850	0	0	17248	0	0	22296	0	1	111718	0	0	33582	0	0	5486	0	0	30782	0	FALSE	TRUE	CodingTranscript	NON_SYNONYMOUS	7	missense	0.55	0.05
11_75280089_A_C	11	75280089	rs148613550	A	C	E	PASS	NA	p.Glu276Ala	p.Glu276Ala	c.827A>C	missense		3	246262	0	0.01218	0	15304	0	0	9850	0	0	17248	0	0	22296	0	3	111714	0	0	33582	0	0	5486	0	0	30782	0	TRUE	TRUE	CodingTranscript	NON_SYNONYMOUS	7	missense	0.55	0.05
11_75280091_C_A	11	75280091	rs765044030	C	A	E	PASS	NA	p.Pro277Thr	p.Pro277Thr	c.829C>A	missense		1	246262	0	0.004061	0	15300	0	0	9850	0	0	17248	0	0	22296	0	1	111718	0	0	33582	0	0	5486	0	0	30782	0	TRUE	TRUE	CodingTranscript	NON_SYNONYMOUS	7	missense	0.56	0.05
11_75280092_C_A	11	75280092	.	C	A	E	PASS	NA	p.Pro277His	p.Pro277His	c.830C>A	missense		1	246262	0	0.004061	0	15302	0	0	9850	0	0	17248	0	0	22294	0	1	111718	0	0	33582	0	0	5486	0	0	30782	0	TRUE	TRUE	CodingTranscript	NON_SYNONYMOUS	7	missense	0.56	0.05
11_75280093_T_C	11	75280093	rs373407071	T	C	E	PASS	NA	p.Pro277Pro	p.Pro277Pro	c.831T>C	synonymous		2	246262	0	0.008121	0	15304	0	0	9850	0	0	17248	0	0	22294	0	2	111716	0	0	33582	0	0	5486	0	0	30782	0	FALSE	TRUE	CodingTranscript	SYNONYMOUS	5	synonymous	0.56	0.05
11_75280096_C_T	11	75280096	rs376437954	C	T	E G	PASS	PASS	p.Leu278Leu	p.Leu278Leu	c.834C>T	synonymous		3	277222	0	0.01082	1	24026	0	0	10152	0	0	18870	0	0	25788	0	1	126718	0	1	34418	0	0	6468	0	0	30782	0	FALSE	TRUE	CodingTranscript	SYNONYMOUS	5	synonymous	0.56	0.05
11_75280097_G_A	11	75280097	rs758458147	G	A	E	PASS	NA	p.Glu279Lys	p.Glu279Lys	c.835G>A	missense		2	246256	0	0.008122	0	15302	0	0	9850	0	0	17248	0	0	22294	0	2	111712	0	0	33582	0	0	5486	0	0	30782	0	FALSE	TRUE	CodingTranscript	NON_SYNONYMOUS	7	missense	0.56	0.05
11_75280097_G_C	11	75280097	rs758458147	G	C	E	PASS	NA	p.Glu279Gln	p.Glu279Gln	c.835G>C	missense		18	246256	1	0.07309	0	15302	0	0	9850	0	0	17248	0	0	22294	0	0	111712	0	2	33582	0	0	5486	0	16	30782	1	TRUE	TRUE	CodingTranscript	NON_SYNONYMOUS	7	missense	0.56	0.05
11_75280100_C_A	11	75280100	rs200572997	C	A	E	PASS	NA	p.Arg280Ser	p.Arg280Ser	c.838C>A	missense		2	246262	0	0.008121	0	15302	0	0	9850	0	2	17248	0	0	22296	0	0	111716	0	0	33582	0	0	5486	0	0	30782	0	TRUE	TRUE	CodingTranscript	NON_SYNONYMOUS	7	missense	0.56	0.05
11_75280100_C_T	11	75280100	rs200572997	C	T	E G	PASS	RF	p.Arg280Cys	p.Arg280Cys	c.838C>T	missense		1	246262	0	0.004061	0	15302	0	0	9850	0	1	17248	0	0	22296	0	0	111716	0	0	33582	0	0	5486	0	0	30782	0	FALSE	TRUE	CodingTranscript	NON_SYNONYMOUS	7	missense	0.56	0.05
11_75280101_G_A	11	75280101	rs370057420	G	A	E	PASS	NA	p.Arg280His	p.Arg280His	c.839G>A	missense		6	246252	0	0.02437	0	15302	0	0	9850	0	0	17244	0	0	22296	0	4	111712	0	0	33582	0	2	5486	0	0	30780	0	FALSE	TRUE	CodingTranscript	NON_SYNONYMOUS	7	missense	0.56	0.05
11_75280102_C_T	11	75280102	rs149585133	C	T	E G	PASS	PASS	p.Arg280Arg	p.Arg280Arg	c.840C>T	synonymous		30	277230	0	0.0001082	0	24028	0	0	10152	0	0	18870	0	0	25790	0	30	126722	0	0	34418	0	0	6468	0	0	30782	0	FALSE	TRUE	CodingTranscript	SYNONYMOUS	5	synonymous	0.57	0.05
11_75280105_T_C	11	75280105	rs544719966	T	C	E G	PASS	PASS	p.Leu281Leu	p.Leu281Leu	c.843T>C	synonymous		7	277220	0	0.02525	1	24028	0	0	10152	0	0	18870	0	0	25786	0	1	126716	0	0	34418	0	0	6468	0	5	30782	0	FALSE	TRUE	CodingTranscript	SYNONYMOUS	5	synonymous	0.56	0.04
11_75280117_A_G	11	75280117	rs779197294	A	G	E	PASS	NA	p.Leu285Leu	p.Leu285Leu	c.855A>G	synonymous		2	246250	0	0.008122	0	15304	0	0	9850	0	0	17244	0	0	22296	0	2	111706	0	0	33582	0	0	5486	0	0	30782	0	FALSE	TRUE	CodingTranscript	SYNONYMOUS	5	synonymous	0.56	0.04
11_75280121_A_C	11	75280121	.	A	C	E	PASS	NA	p.Lys287Gln	p.Lys287Gln	c.859A>C	missense		1	246236	0	0.004061	0	15302	0	0	9850	0	0	17242	0	0	22298	0	1	111694	0	0	33582	0	0	5486	0	0	30782	0	TRUE	TRUE	CodingTranscript	NON_SYNONYMOUS	7	missense	0.56	0.04
11_75280121_A_G	11	75280121	.	A	G	E	PASS	NA	p.Lys287Glu	p.Lys287Glu	c.859A>G	missense		1	246236	0	0.004061	1	15302	0	0	9850	0	0	17242	0	0	22298	0	0	111694	0	0	33582	0	0	5486	0	0	30782	0	FALSE	TRUE	CodingTranscript	NON_SYNONYMOUS	7	missense	0.56	0.04
11_75280123_A_G	11	75280123	rs748644655	A	G	E	PASS	NA	p.Lys287Lys	p.Lys287Lys	c.861A>G	synonymous		3	246222	0	0.01218	0	15304	0	0	9848	0	0	17238	0	0	22298	0	0	111684	0	3	33582	0	0	5486	0	0	30782	0	FALSE	TRUE	CodingTranscript	SYNONYMOUS	5	synonymous	0.56	0.04
11_75280124_G_A	11	75280124	rs369751579	G	A	E	PASS	NA	p.Glu288Lys	p.Glu288Lys	c.862G>A	missense		4	246214	0	0.01625	0	15304	0	0	9848	0	0	17240	0	0	22294	0	0	111680	0	0	33582	0	0	5486	0	4	30780	0	FALSE	TRUE	CodingTranscript	NON_SYNONYMOUS	7	missense	0.56	0.04
11_75280126_G_A	11	75280126	rs561247039	G	A	E	PASS	NA	p.Glu288Glu	p.Glu288Glu	c.864G>A	synonymous		1	246216	0	0.004061	0	15302	0	0	9848	0	0	17240	0	0	22298	0	0	111680	0	0	33580	0	0	5486	0	1	30782	0	FALSE	TRUE	CodingTranscript	SYNONYMOUS	5	synonymous	0.56	0.04
11_75280127_CA_C	11	75280127	.	CA	C	E	PASS	NA	p.Gln289ArgfsTer2	p.Gln289ArgfsTer2	c.866delA	frameshift		1	246198	0	0.004062	0	15302	0	0	9848	0	0	17238	0	0	22290	0	1	111670	0	0	33582	0	0	5486	0	0	30782	0	NA	TRUE	CodingTranscript	FRAME_SHIFT	7	frameshift,feature_truncation	0.56	0.04
11_75280138_C_G	11	75280138	rs771012011	C	G	E	PASS	NA	p.Ile292Met	p.Ile292Met	c.876C>G	missense		1	246134	0	0.004063	0	15292	0	0	9846	0	0	17238	0	0	22288	0	0	111628	0	1	33580	0	0	5482	0	0	30780	0	TRUE	TRUE	CodingTranscript	NON_SYNONYMOUS	7	missense	0.56	0.04
11_75280144_G_A	11	75280144	rs759715144	G	A	E	PASS	NA	p.Met294Ile	p.Met294Ile	c.882G>A	missense		1	246060	0	0.004064	0	15294	0	0	9846	0	0	17236	0	0	22286	0	1	111558	0	0	33580	0	0	5482	0	0	30778	0	FALSE	TRUE	CodingTranscript	NON_SYNONYMOUS	7	missense	0.56	0.04
11_75280145_G_C	11	75280145	.	G	C	E G	PASS	PASS	p.Gly295Arg	p.Gly295Arg	c.883G>C	missense		10	276998	0	3.61e-5	0	24026	0	0	10148	0	0	18854	0	0	25778	0	9	126534	0	0	34414	0	1	6464	0	0	30780	0	TRUE	TRUE	CodingTranscript	NON_SYNONYMOUS	7	missense	0.56	0.04
11_75280147_G_A	11	75280147	rs769607505	G	A	E	PASS	NA	p.Gly295Gly	p.Gly295Gly	c.885G>A	synonymous		4	245970	0	0.01626	0	15290	0	0	9846	0	0	17226	0	0	22290	0	4	111498	0	0	33572	0	0	5480	0	0	30768	0	FALSE	TRUE	CodingTranscript	SYNONYMOUS	5	synonymous	0.56	0.04
11_75280153_G_A	11	75280153	rs200106884	G	A	E	PASS	NA	p.Met297Ile	p.Met297Ile	c.891G>A	missense		1	245838	0	0.004068	0	15270	0	0	9844	0	0	17216	0	0	22270	0	1	111430	0	0	33570	0	0	5478	0	0	30760	0	FALSE	TRUE	CodingTranscript	NON_SYNONYMOUS	7	missense	0.57	0.04
11_75280153_G_T	11	75280153	rs200106884	G	T	E G	PASS	PASS	p.Met297Ile	p.Met297Ile	c.891G>T	missense		6	276792	0	0.02168	0	24000	0	0	10142	0	0	18838	0	0	25762	0	5	126422	0	1	34408	0	0	6460	0	0	30760	0	TRUE	TRUE	CodingTranscript	NON_SYNONYMOUS	7	missense	0.57	0.04
11_75280164_C_G	11	75280164	rs764127543	C	G	E	PASS	NA	p.Ala301Gly	p.Ala301Gly	c.902C>G	missense		1	245428	0	0.004075	0	15216	0	0	9832	0	0	17188	0	0	22224	0	0	111254	0	0	33524	0	0	5464	0	1	30726	0	TRUE	TRUE	CodingTranscript	NON_SYNONYMOUS	7	missense	0.58	0.03
11_75280169_G_A	11	75280169	rs751052033	G	A	E	PASS	NA	p.Ala303Thr	p.Ala303Thr	c.907G>A	missense		1	245158	0	0.004079	0	15198	0	0	9826	0	0	17172	0	0	22218	0	1	111074	0	0	33516	0	0	5462	0	0	30692	0	FALSE	TRUE	CodingTranscript	NON_SYNONYMOUS	7	missense	0.58	0.03
11_75280175_T_C	11	75280175	rs549207386	T	C	E	PASS	NA	p.Ser305Pro	p.Ser305Pro	c.913T>C	missense		1	244662	0	0.004087	0	15130	0	0	9826	0	0	17130	0	0	22184	0	0	110820	0	0	33468	0	0	5458	0	1	30646	0	FALSE	TRUE	CodingTranscript	NON_SYNONYMOUS	7	missense	0.59	0.01
11_75280177_C_T	11	75280177	rs147740415	C	T	E G	PASS	PASS	p.Ser305Ser	p.Ser305Ser	c.915C>T	synonymous		58	275274	1	0.0002107	49	23832	1	0	10118	0	0	18726	0	0	25642	0	0	125646	0	9	34270	0	0	6436	0	0	30604	0	FALSE	TRUE	CodingTranscript	SYNONYMOUS	5	synonymous	0.58	0.00
11_75280185_A_G	11	75280185	rs142663000	A	G	E G	PASS	PASS	p.Lys308Arg	p.Lys308Arg	c.923A>G	missense		6	274052	0	0.02189	1	23718	0	0	10084	0	0	18662	0	0	25548	0	5	124974	0	0	34154	0	0	6422	0	0	30490	0	FALSE	TRUE	CodingTranscript	NON_SYNONYMOUS	7	missense	0.60	0.00
11_75280188_G_A	11	75280188	rs753068848	G	A	E	PASS	NA	p.Gly309Asp	p.Gly309Asp	c.926G>A	missense		3	241986	0	1.24e-5	0	14864	0	0	9772	0	0	16962	0	0	21958	0	1	109396	0	0	33188	0	1	5426	0	1	30420	0	FALSE	TRUE	CodingTranscript	NON_SYNONYMOUS	7	missense	0.60	0.00
11_75280195_G_A	11	75280195	rs778276572	G	A	E	PASS	NA	p.Val311Val	p.Val311Val	c.933G>A	synonymous		1	239822	0	4.17e-6	0	14686	0	0	9710	0	0	16820	0	0	21796	0	1	108202	0	0	33002	0	0	5394	0	0	30212	0	FALSE	TRUE	CodingTranscript	SYNONYMOUS	5	synonymous	0.62	0.00
11_75280196_G_A	11	75280196	.	G	A	E	PASS	NA	p.Glu312Lys	p.Glu312Lys	c.934G>A	missense		1	239588	0	0.004174	0	14662	0	0	9708	0	0	16796	0	0	21792	0	1	108058	0	0	32974	0	0	5384	0	0	30214	0	FALSE	TRUE	CodingTranscript	NON_SYNONYMOUS	7	missense	0.61	0.00
11_75280198_G_A	11	75280198	.	G	A	E	PASS	NA	p.Glu312Glu	p.Glu312Glu	c.936G>A	synonymous		1	237704	0	0.004207	0	14430	0	0	9676	0	0	16658	0	0	21610	0	0	107122	0	1	32780	0	0	5376	0	0	30052	0	FALSE	TRUE	CodingTranscript	SYNONYMOUS	5	synonymous	0.62	0.00
11_75280203_C_T	11	75280203	rs747053861	C	T	E	PASS	NA	p.Thr314Ile	p.Thr314Ile	c.941C>T	missense		1	235332	0	0.004249	0	14194	0	0	9630	0	0	16508	0	0	21414	0	1	105810	0	0	32540	0	0	5342	0	0	29894	0	FALSE	TRUE	CodingTranscript	NON_SYNONYMOUS	7	missense	0.62	0.00
11_75280228_C_CCCAG	11	75280228	rs779247058	C	CCCAG	E	PASS	NA	p.Ter325SerfsTer61â€	p.Ter325SerfsTer61	c.969_972dupAGCC	frameshift	LC LoF	4	204626	0	0.01955	0	11790	0	0	9104	0	0	14140	0	0	19256	0	4	89142	0	0	28962	0	0	4808	0	0	27424	0	NA	TRUE	Transcript	INTRONIC	2	intron,feature_elongation	0.63	0.00
11_75280237_G_C	11	75280237	.	G	C	E	PASS	NA	p.Ter325TyrextTer?â€	p.Ter325TyrextTer?	c.975G>C	stop lost		4	186388	0	0.02146	0	10524	0	0	8788	0	0	12772	0	0	18118	0	0	78678	0	4	26912	0	0	4534	0	0	26062	0	TRUE	TRUE	Transcript	INTRONIC	2	intron	0.64	0.00
11_75280239_G_A	11	75280239	rs746088810	G	A	E	PASS	NA			c.*2G>A	3' UTR		2	181450	0	0.01102	0	10160	0	0	8722	0	0	12430	0	0	17794	0	1	75776	0	0	26466	0	0	4450	0	1	25652	0	FALSE	TRUE	Transcript	INTRONIC	2	intron	0.64	0.00
11_75280244_G_A	11	75280244	rs769977294	G	A	E	PASS	NA			c.*7G>A	3' UTR		6	176116	0	0.03407	0	9826	0	0	8626	0	0	12116	0	0	17348	0	5	72676	0	0	25958	0	1	4312	0	0	25254	0	FALSE	TRUE	Transcript	INTRONIC	2	intron	0.66	0.00
11_75280245_C_T	11	75280245	rs367704364	C	T	E	PASS	NA			c.*8C>T	3' UTR		4	176068	0	0.02272	1	9808	0	0	8628	0	0	12114	0	0	17338	0	0	72696	0	3	25946	0	0	4304	0	0	25234	0	FALSE	TRUE	Transcript	INTRONIC	2	intron	0.65	0.00
11_75280246_A_T	11	75280246	rs762851059	A	T	E	PASS	NA			c.*9A>T	3' UTR		1	172638	0	0.005792	0	9542	0	0	8584	0	0	11868	0	1	17062	0	0	70708	0	0	25648	0	0	4246	0	0	24980	0	TRUE	TRUE	Transcript	INTRONIC	2	intron	0.64	0.00
11_75280255_A_G	11	75280255	.	A	G	E	PASS	NA			c.*18A>G	3' UTR		1	160234	0	0.006241	0	8718	0	0	8350	0	0	11040	0	0	16022	0	0	63320	0	1	24710	0	0	4066	0	0	24008	0	FALSE	TRUE	Transcript	INTRONIC	2	intron	0.66	0.00
11_75280260_G_T	11	75280260	rs768662280	G	T	E	PASS	NA			c.*23G>T	3' UTR		6	157320	0	0.03814	0	8504	0	0	8284	0	0	10892	0	0	15716	0	3	61624	0	3	24510	0	0	4020	0	0	23770	0	TRUE	TRUE	Transcript	INTRONIC	2	intron	0.65	0.00
11_75280261_G_C	11	75280261	rs528442568	G	C	E	PASS	NA			c.*24G>C	3' UTR		8	156924	0	0.05098	0	8482	0	0	8256	0	8	10840	0	0	15708	0	0	61440	0	0	24458	0	0	4016	0	0	23724	0	TRUE	TRUE	Transcript	INTRONIC	2	intron	0.66	0.00
11_75280261_G_T	11	75280261	rs528442568	G	T	E	PASS	NA			c.*24G>T	3' UTR		3	156924	0	0.01912	0	8482	0	0	8256	0	0	10840	0	0	15708	0	0	61440	0	3	24458	0	0	4016	0	0	23724	0	TRUE	TRUE	Transcript	INTRONIC	2	intron	0.66	0.00
11_75280268_T_A	11	75280268	.	T	A	E	PASS	NA			c.*31T>A	3' UTR		3	150172	0	0.01998	1	8060	0	0	8058	0	0	10554	0	0	15126	0	0	57344	0	2	24116	0	0	3890	0	0	23024	0	TRUE	TRUE	Transcript	INTRONIC	2	intron	0.66	0.00
11_75280270_C_T	11	75280270	.	C	T	E	PASS	NA			c.*33C>T	3' UTR		1	147724	0	0.006769	0	7926	0	0	7922	0	0	10488	0	0	14874	0	1	55950	0	0	23974	0	0	3870	0	0	22720	0	FALSE	TRUE	Transcript	INTRONIC	2	intron	0.66	0.00
11_75280272_T_G	11	75280272	rs143305212	T	G	E G	PASS	PASS			c.*35T>G	3' UTR		1344	177724	23	0.007562	8	16600	0	0	8178	0	401	12090	4	4	18280	0	23	70440	0	317	24808	4	21	4836	0	570	22492	15	TRUE	TRUE	Transcript	INTRONIC	2	intron	0.64	0.00
11_75280279_C_A	11	75280279	.	C	A	G	NA	PASS			c.*42C>A	3' UTR		1	30888	0	0.03238	0	8704	0	0	302	0	0	1622	0	0	3490	0	1	14954	0	0	838	0	0	978	0	0	0	0	TRUE	TRUE	Transcript	INTRONIC	2	intron	0.65	0.00
11_75280283_C_T	11	75280283	.	C	T	E	PASS	NA			c.*46C>T	3' UTR		1	139822	0	0.007152	0	7566	0	0	7436	0	0	10296	0	0	14142	0	0	51674	0	0	23568	0	0	3690	0	1	21450	0	FALSE	TRUE	Transcript	INTRONIC	2	intron	0.66	0.00
11_75280305_C_T	11	75280305	.	C	T	G	NA	PASS			c.*68C>T	3' UTR		1	30926	0	0.03234	1	8716	0	0	302	0	0	1620	0	0	3492	0	0	14982	0	0	838	0	0	976	0	0	0	0	FALSE	TRUE	Transcript	INTRONIC	2	intron	0.66	0.00
11_75280334_CTGGGCTCTGTGA_C	11	75280334	.	CTGGGCTCTGTGA	C	G	NA	PASS			c.*102_*113delCTCTGTGATGGG	3' UTR		1	30954	0	0.03231	1	8724	0	0	302	0	0	1622	0	0	3492	0	0	14996	0	0	838	0	0	980	0	0	0	0	NA	TRUE	Transcript	INTRONIC	2	intron,feature_truncation	0.58	0.01
11_75280338_G_C	11	75280338	.	G	C	G	NA	PASS			c.*101G>C	3' UTR		4	30966	0	0.0001292	0	8730	0	0	302	0	0	1622	0	0	3494	0	0	14998	0	4	838	0	0	982	0	0	0	0	TRUE	TRUE	Transcript	INTRONIC	2	intron	0.60	0.00
11_75280348_G_A	11	75280348	.	G	A	G	NA	PASS			c.*111G>A	3' UTR		1	30958	0	3.23e-5	0	8726	0	0	302	0	0	1622	0	0	3492	0	1	14996	0	0	838	0	0	982	0	0	0	0	FALSE	TRUE	Transcript	INTRONIC	2	intron	0.58	0.01
11_75280353_A_G	11	75280353	rs556891115	A	G	G	NA	PASS			c.*116A>G	3' UTR		30	30938	0	0.0009697	30	8716	0	0	302	0	0	1622	0	0	3488	0	0	14990	0	0	838	0	0	982	0	0	0	0	FALSE	TRUE	Transcript	INTRONIC	2	intron	0.55	0.01
11_75280356_C_T	11	75280356	.	C	T	G	NA	PASS			c.*119C>T	3' UTR		1	30958	0	3.23e-5	0	8724	0	0	302	0	0	1622	0	0	3492	0	0	14998	0	1	838	0	0	982	0	0	0	0	FALSE	TRUE	Transcript	INTRONIC	2	intron	0.55	0.01
11_75280393_G_T	11	75280393	.	G	T	G	NA	PASS			c.*156G>T	3' UTR		1	30942	0	0.03232	0	8716	0	0	302	0	0	1622	0	0	3494	0	1	14990	0	0	836	0	0	982	0	0	0	0	TRUE	TRUE	Transcript	INTRONIC	2	intron	0.50	0.03
11_75280395_T_C	11	75280395	.	T	C	G	NA	PASS			c.*158T>C	3' UTR		1	30942	0	0.03232	0	8718	0	1	302	0	0	1622	0	0	3494	0	0	14986	0	0	838	0	0	982	0	0	0	0	FALSE	TRUE	Transcript	INTRONIC	2	intron	0.48	0.03
11_75280420_C_T	11	75280420	.	C	T	G	NA	PASS			c.*183C>T	3' UTR		1	30956	0	3.23e-5	0	8728	0	0	302	0	0	1622	0	0	3490	0	1	14994	0	0	838	0	0	982	0	0	0	0	FALSE	TRUE	Transcript	INTRONIC	2	intron	0.42	0.03
11_75280426_A_G	11	75280426	.	A	G	G	NA	PASS			c.*189A>G	3' UTR		1	30926	0	0.03234	0	8716	0	0	302	0	1	1618	0	0	3486	0	0	14984	0	0	838	0	0	982	0	0	0	0	FALSE	TRUE	Transcript	INTRONIC	2	intron	0.41	0.03
11_75280445_T_C	11	75280445	.	T	C	G	NA	PASS			c.*208T>C	3' UTR		1	30952	0	0.03231	1	8724	0	0	302	0	0	1620	0	0	3490	0	0	14998	0	0	838	0	0	980	0	0	0	0	FALSE	TRUE	Transcript	INTRONIC	2	intron	0.40	0.03
11_75280464_GTAT_G	11	75280464	rs531489141	GTAT	G	G	NA	PASS			c.*234_*236delTAT	3' UTR		4	30810	0	0.0001298	0	8678	0	0	302	0	4	1614	0	0	3462	0	0	14952	0	0	822	0	0	980	0	0	0	0	NA	TRUE	Transcript	INTRONIC	2	intron,feature_truncation	0.39	0.04
11_75280466_A_T	11	75280466	rs762481479	A	T	G	NA	PASS			c.*229A>T	3' UTR		1	30750	0	0.03252	1	8664	0	0	302	0	0	1604	0	0	3452	0	0	14936	0	0	816	0	0	976	0	0	0	0	TRUE	TRUE	Transcript	INTRONIC	2	intron	0.39	0.04
11_75280475_A_AT	11	75280475	rs553194934	A	AT	G	NA	PASS			c.954+269dupT	intron		8	30458	0	0.0002627	2	8612	0	0	296	0	1	1606	0	2	3316	0	3	14876	0	0	796	0	0	956	0	0	0	0	NA	TRUE	Transcript	INTRONIC	2	intron,feature_elongation	0.41	0.04
11_75280475_A_T	11	75280475	rs553194934	A	T	G	NA	PASS			c.*238A>T	3' UTR		6	30458	0	0.0001970	5	8612	0	0	296	0	1	1606	0	0	3316	0	0	14876	0	0	796	0	0	956	0	0	0	0	TRUE	TRUE	Transcript	INTRONIC	2	intron	0.41	0.04
11_75280477_T_TA	11	75280477	rs372167947	T	TA	G	NA	PASS			c.954+261_954+262insA	intron		1	30770	0	3.25e-5	0	8702	0	0	298	0	0	1614	0	1	3408	0	0	14958	0	0	818	0	0	972	0	0	0	0	NA	TRUE	Transcript	INTRONIC	2	intron,feature_elongation	0.42	0.04
11_75280478_T_A	11	75280478	rs606984	T	A	G	NA	PASS			c.954+262T>A	intron		13249	30828	3040	0.4298	2549	8696	368	151	302	34	293	1612	28	1557	3480	350	8005	14928	2120	258	836	36	436	974	104	0	0	0	TRUE	FALSE	Transcript	INTRONIC	2	intron	0.42	0.04
11_75280478_T_TTA	11	75280478	rs606984	T	TTA	G	NA	PASS			c.954+263_954+264insAT	intron		1	30828	0	0.03244	0	8696	0	0	302	0	0	1612	0	1	3480	0	0	14928	0	0	836	0	0	974	0	0	0	0	NA	TRUE	Transcript	INTRONIC	2	intron,feature_elongation	0.42	0.04
11_75280481_T_A	11	75280481	rs186303252	T	A	G	NA	PASS			c.954+265T>A	intron		7	30702	0	0.0002280	5	8662	0	0	302	0	0	1604	0	0	3414	0	1	14920	0	1	820	0	0	980	0	0	0	0	TRUE	TRUE	Transcript	INTRONIC	2	intron	0.42	0.04
11_75280493_A_G	11	75280493	.	A	G	G	NA	PASS			c.954+277A>G	intron		3	30808	0	0.09738	0	8694	0	0	302	0	0	1620	0	1	3472	0	2	14910	0	0	838	0	0	972	0	0	0	0	FALSE	TRUE	Transcript	INTRONIC	2	intron	0.43	0.04
11_75280495_TCTCA_T	11	75280495	.	TCTCA	T	G	NA	PASS			c.954+283_954+286delACTC	intron		1	30884	0	0.03238	0	8714	0	0	302	0	0	1620	0	0	3478	0	1	14954	0	0	836	0	0	980	0	0	0	0	NA	TRUE	Transcript	INTRONIC	2	intron,feature_truncation	0.44	0.05
11_75280509_C_G	11	75280509	.	C	G	G	NA	PASS			c.954+293C>G	intron		1	30094	0	0.03323	1	8474	0	0	300	0	0	1564	0	0	3258	0	0	14744	0	0	794	0	0	960	0	0	0	0	TRUE	TRUE	Transcript	INTRONIC	2	intron	0.45	0.04
11_75280512_G_A	11	75280512	.	G	A	G	NA	PASS			c.954+296G>A	intron		7	30936	0	0.0002263	0	8718	0	0	302	0	7	1622	0	0	3486	0	0	14988	0	0	838	0	0	982	0	0	0	0	FALSE	TRUE	Transcript	INTRONIC	2	intron	0.46	0.04
11_75280522_C_T	11	75280522	rs558963651	C	T	G	NA	PASS			c.954+306C>T	intron		1	30934	0	0.03233	1	8730	0	0	302	0	0	1622	0	0	3478	0	0	14988	0	0	834	0	0	980	0	0	0	0	FALSE	TRUE	Transcript	INTRONIC	2	intron	0.46	0.04
11_75280525_T_C	11	75280525	rs148350892	T	C	G	NA	PASS			c.954+309T>C	intron		40	30136	0	0.001327	40	8496	0	0	300	0	0	1586	0	0	3252	0	0	14750	0	0	788	0	0	964	0	0	0	0	FALSE	TRUE	Transcript	INTRONIC	2	intron	0.46	0.04
11_75280537_G_A	11	75280537	.	G	A	G	NA	PASS			c.954+321G>A	intron		1	30918	0	0.03234	0	8704	0	0	302	0	0	1622	0	0	3488	0	0	14986	0	0	838	0	1	978	0	0	0	0	FALSE	TRUE	Transcript	INTRONIC	2	intron	0.49	0.04
11_75280547_A_G	11	75280547	.	A	G	G	NA	PASS			c.954+331A>G	intron		1	30928	0	0.03233	0	8720	0	0	302	0	0	1620	0	0	3484	0	1	14984	0	0	838	0	0	980	0	0	0	0	FALSE	TRUE	Transcript	INTRONIC	2	intron	0.52	0.04
11_75282755_G_T	11	75282755	.	G	T	G	NA	PASS			c.955-71G>T	intron		1	30942	0	0.03232	0	8724	0	0	300	0	1	1622	0	0	3494	0	0	14984	0	0	838	0	0	980	0	0	0	0	TRUE	TRUE	Transcript	INTRONIC	2	intron	0.60	0.01
11_75282772_G_A	11	75282772	rs867140200	G	A	G	NA	PASS			c.955-54G>A	intron		1	30920	0	0.03234	0	8718	0	0	302	0	0	1622	0	0	3494	0	1	14970	0	0	838	0	0	976	0	0	0	0	FALSE	TRUE	Transcript	INTRONIC	2	intron	0.62	0.01
11_75282775_G_A	11	75282775	rs528040772	G	A	E	PASS	NA			c.955-51G>A	intron		2	234916	0	0.008514	0	14628	0	0	9726	0	2	17028	0	0	17142	0	0	107228	0	0	33324	0	0	5378	0	0	30462	0	FALSE	TRUE	Transcript	INTRONIC	2	intron	0.62	0.01
11_75282778_G_C	11	75282778	.	G	C	E	PASS	NA			c.955-48G>C	intron		2	235898	0	0.008478	0	14706	0	0	9750	0	1	17060	0	0	17502	0	0	107650	0	0	33354	0	1	5386	0	0	30490	0	TRUE	TRUE	Transcript	INTRONIC	2	intron	0.63	0.01
11_75282779_A_G	11	75282779	rs371267874	A	G	E	PASS	NA			c.955-47A>G	intron		6	236276	0	0.02539	0	14728	0	0	9754	0	0	17070	0	0	17702	0	5	107758	0	1	33358	0	0	5394	0	0	30512	0	FALSE	TRUE	Transcript	INTRONIC	2	intron	0.63	0.01
11_75282793_G_A	11	75282793	rs372559471	G	A	E G	PASS	PASS			c.955-33G>A	intron		14	271316	0	5.16e-5	12	23674	0	0	10088	0	0	18766	0	0	23184	0	0	124198	0	1	34320	0	1	6394	0	0	30692	0	FALSE	TRUE	Transcript	INTRONIC	2	intron	0.61	0.01
11_75282794_G_A	11	75282794	.	G	A	E G	PASS	PASS			c.955-32G>A	intron		2	271370	0	7.37e-6	0	23694	0	0	10098	0	0	18766	0	0	23192	0	2	124224	0	0	34318	0	0	6396	0	0	30682	0	FALSE	TRUE	Transcript	INTRONIC	2	intron	0.60	0.01
11_75282807_C_T	11	75282807	rs201369908	C	T	E	PASS	NA			c.955-19C>T	intron		4	242758	0	0.01648	0	15088	0	0	9810	0	0	17174	0	1	21006	0	3	109952	0	0	33536	0	0	5444	0	0	30748	0	FALSE	TRUE	Transcript	INTRONIC	2	intron	0.61	0.03
11_75282808_ACCT_A	11	75282808	rs746127263	ACCT	A	E	PASS	NA			c.955-14_955-12delCCT	intron		1	242948	0	0.004116	1	15108	0	0	9812	0	0	17176	0	0	21104	0	0	110010	0	0	33540	0	0	5444	0	0	30754	0	NA	TRUE	Transcript	INTRONIC	2	intron,feature_truncation	0.61	0.03
11_75282809_C_T	11	75282809	.	C	T	G	NA	PASS			c.955-17C>T	intron		1	30906	0	0.03236	0	8708	0	0	302	0	0	1622	0	0	3494	0	1	14964	0	0	838	0	0	978	0	0	0	0	FALSE	TRUE	Transcript	INTRONIC	2	intron	0.61	0.03
11_75282810_C_T	11	75282810	.	C	T	E	PASS	NA			c.955-16C>T	intron		1	243078	0	0.004114	0	15114	0	0	9814	0	0	17184	0	0	21172	0	0	110062	0	0	33544	0	0	5444	0	1	30744	0	FALSE	TRUE	Transcript	INTRONIC	2	intron	0.61	0.03
11_75282813_C_T	11	75282813	.	C	T	E	PASS	NA			c.955-13C>T	intron		1	243452	0	0.004108	0	15118	0	0	9818	0	0	17188	0	0	21392	0	1	110180	0	0	33550	0	0	5452	0	0	30754	0	FALSE	TRUE	Transcript	INTRONIC	2	intron	0.62	0.04
11_75282815_T_G	11	75282815	rs778152076	T	G	E	PASS	NA			c.955-11T>G	intron		1	243680	0	0.004104	1	15128	0	0	9820	0	0	17192	0	0	21528	0	0	110242	0	0	33554	0	0	5452	0	0	30764	0	TRUE	TRUE	Transcript	INTRONIC	2	intron	0.60	0.03
11_75282815_TG_T	11	75282815	rs778152076	TG	T	G	NA	PASS			c.955-10delG	intron		1	30906	0	0.03236	1	8702	0	0	302	0	0	1620	0	0	3494	0	0	14972	0	0	838	0	0	978	0	0	0	0	NA	TRUE	Transcript	INTRONIC	2	intron,feature_truncation	0.61	0.03
11_75282816_G_A	11	75282816	.	G	A	E	PASS	NA			c.955-10G>A	intron		1	243706	0	0.004103	0	15134	0	0	9818	0	0	17192	0	0	21532	0	0	110260	0	1	33554	0	0	5452	0	0	30764	0	FALSE	TRUE	Transcript	INTRONIC	2	intron	0.60	0.03
11_75282816_G_T	11	75282816	.	G	T	G	NA	PASS			c.955-10G>T	intron		1	30914	0	0.03235	1	8704	0	0	302	0	0	1622	0	0	3490	0	0	14976	0	0	838	0	0	982	0	0	0	0	TRUE	TRUE	Transcript	INTRONIC	2	intron	0.60	0.03
11_75282819_C_T	11	75282819	rs370438059	C	T	E G	PASS	PASS	c.955-7C>T		c.955-7C>T	splice region		22	274804	0	0.08006	10	23840	0	0	10116	0	0	18820	0	0	25144	0	1	125290	0	3	34396	0	0	6432	0	8	30766	0	FALSE	TRUE	Transcript	SPLICE_SITE	5	splice,intron	0.60	0.03
11_75282820_C_A	11	75282820	rs7105575	C	A	E G	PASS	PASS	c.955-6C>A		c.955-6C>A	splice region		2650	274912	134	0.009639	2472	23824	134	7	10122	0	0	18816	0	0	25210	0	13	125340	0	132	34398	0	19	6436	0	7	30766	0	TRUE	TRUE	Transcript	SPLICE_SITE	5	splice,intron	0.60	0.03
11_75282821_C_T	11	75282821	.	C	T	E	PASS	NA	c.955-5C>T		c.955-5C>T	splice region		1	244140	0	0.004096	0	15146	0	1	9818	0	0	17202	0	0	21764	0	0	110422	0	0	33560	0	0	5458	0	0	30770	0	FALSE	TRUE	Transcript	SPLICE_SITE	5	splice,intron	0.60	0.03
11_75282830_AC_A	11	75282830	rs772433295	AC	A	E	PASS	NA	p.Leu321TrpfsTer6	p.Leu321TrpfsTer6	c.961delC	frameshift		4	244782	0	0.01634	0	15166	0	0	9822	0	0	17212	0	0	22016	0	4	110760	0	0	33566	0	0	5464	0	0	30776	0	NA	TRUE	CodingTranscript	FRAME_SHIFT	7	frameshift,feature_truncation	0.61	0.03
11_75282835_G_A	11	75282835	rs781326376	G	A	E	PASS	NA	p.Ala322Thr	p.Ala322Thr	c.964G>A	missense		1	244952	0	0.004082	0	15178	0	0	9830	0	0	17210	0	1	22066	0	0	110856	0	0	33570	0	0	5468	0	0	30774	0	FALSE	TRUE	CodingTranscript	NON_SYNONYMOUS	7	missense	0.60	0.03
11_75282837_T_C	11	75282837	.	T	C	E	PASS	NA	p.Ala322Ala	p.Ala322Ala	c.966T>C	synonymous		1	245170	0	0.004079	0	15192	0	0	9832	0	0	17210	0	0	22134	0	1	110986	0	0	33568	0	0	5470	0	0	30778	0	FALSE	TRUE	CodingTranscript	SYNONYMOUS	5	synonymous	0.60	0.03
11_75282839_G_A	11	75282839	rs144791057	G	A	E	PASS	NA	p.Gly323Glu	p.Gly323Glu	c.968G>A	missense		21	245164	0	0.08566	0	15196	0	0	9832	0	0	17208	0	8	22140	0	12	110968	0	0	33572	0	1	5470	0	0	30778	0	FALSE	TRUE	CodingTranscript	NON_SYNONYMOUS	7	missense	0.59	0.03
11_75282840_G_T	11	75282840	rs756342488	G	T	E	PASS	NA	p.Gly323Gly	p.Gly323Gly	c.969G>T	synonymous		4	245140	0	0.01632	0	15196	0	0	9832	0	0	17210	0	0	22124	0	0	110964	0	4	33570	0	0	5468	0	0	30776	0	TRUE	TRUE	CodingTranscript	SYNONYMOUS	5	synonymous	0.59	0.03
11_75282847_C_G	11	75282847	.	C	G	E	PASS	NA	p.Leu326Val	p.Leu326Val	c.976C>G	missense		1	245494	0	0.004073	0	15218	0	0	9834	0	0	17216	0	0	22226	0	0	111176	0	0	33572	0	0	5474	0	1	30778	0	TRUE	TRUE	CodingTranscript	NON_SYNONYMOUS	7	missense	0.61	0.04
11_75282850_A_G	11	75282850	rs780442561	A	G	E	PASS	NA	p.Thr327Ala	p.Thr327Ala	c.979A>G	missense		1	245620	0	0.004071	0	15230	0	0	9834	0	0	17220	0	0	22244	0	1	111266	0	0	33572	0	0	5474	0	0	30780	0	FALSE	TRUE	CodingTranscript	NON_SYNONYMOUS	7	missense	0.60	0.04
11_75282853_G_A	11	75282853	rs749048421	G	A	E	PASS	NA	p.Glu328Lys	p.Glu328Lys	c.982G>A	missense		1	245662	0	0.004071	0	15236	0	0	9834	0	0	17218	0	0	22244	0	0	111310	0	0	33570	0	0	5474	0	1	30776	0	FALSE	TRUE	CodingTranscript	NON_SYNONYMOUS	7	missense	0.60	0.04
11_75282855_G_A	11	75282855	rs768537447	G	A	E	PASS	NA	p.Glu328Glu	p.Glu328Glu	c.984G>A	synonymous		2	245740	0	0.008139	0	15252	0	0	9836	0	0	17218	0	0	22258	0	0	111354	0	2	33572	0	0	5470	0	0	30780	0	FALSE	TRUE	CodingTranscript	SYNONYMOUS	5	synonymous	0.60	0.04
11_75282865_A_G	11	75282865	.	A	G	E	PASS	NA	p.Lys332Glu	p.Lys332Glu	c.994A>G	missense		1	245898	0	0.004067	0	15268	0	0	9844	0	1	17226	0	0	22278	0	0	111454	0	0	33574	0	0	5472	0	0	30782	0	FALSE	TRUE	CodingTranscript	NON_SYNONYMOUS	7	missense	0.60	0.07
11_75282867_G_C	11	75282867	rs147936395	G	C	E	PASS	NA	p.Lys332Asn	p.Lys332Asn	c.996G>C	missense		2	245900	0	0.008133	0	15276	0	0	9838	0	0	17226	0	0	22276	0	2	111458	0	0	33572	0	0	5472	0	0	30782	0	TRUE	TRUE	CodingTranscript	NON_SYNONYMOUS	7	missense	0.60	0.07
11_75282876_C_T	11	75282876	rs551772387	C	T	E	PASS	NA	p.Ala335Ala	p.Ala335Ala	c.1005C>T	synonymous		2	245966	0	0.008131	0	15278	0	0	9842	0	0	17234	0	1	22288	0	1	111490	0	0	33576	0	0	5480	0	0	30778	0	FALSE	TRUE	CodingTranscript	SYNONYMOUS	5	synonymous	0.59	0.07
11_75282877_G_A	11	75282877	rs771911618	G	A	E	PASS	NA	p.Asp336Asn	p.Asp336Asn	c.1006G>A	missense		5	246002	0	0.02033	0	15282	0	0	9842	0	0	17236	0	0	22286	0	1	111520	0	0	33576	0	0	5480	0	4	30780	0	FALSE	TRUE	CodingTranscript	NON_SYNONYMOUS	7	missense	0.58	0.07
11_75282882_G_A	11	75282882	rs585821	G	A	E G	PASS	PASS	p.Leu337Leu	p.Leu337Leu	c.1011G>A	synonymous		96011	276684	17540	0.3470	10684	23964	2401	3030	10144	483	3503	18836	333	9592	25742	1796	39490	126402	6188	12783	34372	2376	2237	6450	381	14692	30774	3582	FALSE	TRUE	CodingTranscript	SYNONYMOUS	5	synonymous	0.58	0.07
11_75282886_C_T	11	75282886	rs760125834	C	T	E G	PASS	PASS	p.Arg339Cys	p.Arg339Cys	c.1015C>T	missense		18	277014	0	0.06498	1	24010	0	0	10146	0	0	18860	0	0	25786	0	6	126558	0	0	34414	0	2	6458	0	9	30782	0	FALSE	TRUE	CodingTranscript	NON_SYNONYMOUS	7	missense	0.58	0.07
11_75282887_G_A	11	75282887	rs535510332	G	A	E	PASS	NA	p.Arg339His	p.Arg339His	c.1016G>A	missense		1	246056	0	0.004064	0	15286	0	0	9838	0	0	17240	0	0	22290	0	1	111566	0	0	33574	0	0	5480	0	0	30782	0	FALSE	TRUE	CodingTranscript	NON_SYNONYMOUS	7	missense	0.58	0.07
11_75282887_G_T	11	75282887	rs535510332	G	T	E	PASS	NA	p.Arg339Leu	p.Arg339Leu	c.1016G>T	missense		6	246056	0	0.02438	0	15286	0	0	9838	0	2	17240	0	0	22290	0	1	111566	0	1	33574	0	0	5480	0	2	30782	0	TRUE	TRUE	CodingTranscript	NON_SYNONYMOUS	7	missense	0.58	0.07
11_75282889_A_G	11	75282889	.	A	G	E	PASS	NA	p.Met340Val	p.Met340Val	c.1018A>G	missense		1	246096	0	0.004063	0	15288	0	0	9844	0	0	17242	0	0	22298	0	0	111588	0	1	33572	0	0	5482	0	0	30782	0	FALSE	TRUE	CodingTranscript	NON_SYNONYMOUS	7	missense	0.58	0.07
11_75282891_G_A	11	75282891	rs201416803	G	A	E G	PASS	PASS	p.Met340Ile	p.Met340Ile	c.1020G>A	missense		8	277050	0	0.02888	3	24014	0	0	10150	0	0	18860	0	0	25790	0	5	126574	0	0	34414	0	0	6466	0	0	30782	0	FALSE	TRUE	CodingTranscript	NON_SYNONYMOUS	7	missense	0.59	0.07
11_75282909_G_A	11	75282909	rs764427500	G	A	E	PASS	NA	p.Leu346Leu	p.Leu346Leu	c.1038G>A	synonymous		2	246126	0	0.008126	0	15286	0	0	9848	0	0	17242	0	0	22296	0	2	111612	0	0	33578	0	0	5484	0	0	30780	0	FALSE	TRUE	CodingTranscript	SYNONYMOUS	5	synonymous	0.58	0.07
11_75282912_C_T	11	75282912	rs751935361	C	T	E	PASS	NA	p.Tyr347Tyr	p.Tyr347Tyr	c.1041C>T	synonymous		3	246134	0	0.01219	0	15294	0	0	9848	0	0	17238	0	0	22294	0	3	111616	0	0	33578	0	0	5484	0	0	30782	0	FALSE	TRUE	CodingTranscript	SYNONYMOUS	5	synonymous	0.58	0.08
11_75282913_C_G	11	75282913	rs757716271	C	G	G	NA	PASS	p.Leu348Val	p.Leu348Val	c.1042C>G	missense		1	30954	0	0.03231	0	8730	0	0	302	0	1	1622	0	0	3494	0	0	14986	0	0	838	0	0	982	0	0	0	0	TRUE	TRUE	CodingTranscript	NON_SYNONYMOUS	7	missense	0.59	0.08
11_75282913_C_T	11	75282913	rs757716271	C	T	E	PASS	NA	p.Leu348Leu	p.Leu348Leu	c.1042C>T	synonymous		2	246132	0	0.008126	0	15292	0	0	9848	0	0	17240	0	0	22296	0	2	111610	0	0	33578	0	0	5486	0	0	30782	0	FALSE	TRUE	CodingTranscript	SYNONYMOUS	5	synonymous	0.59	0.08
11_75282917_C_A	11	75282917	.	C	A	E	PASS	NA	p.Ala349Asp	p.Ala349Asp	c.1046C>A	missense		1	246116	0	0.004063	0	15292	0	0	9846	0	0	17240	0	0	22294	0	1	111602	0	0	33578	0	0	5484	0	0	30780	0	TRUE	TRUE	CodingTranscript	NON_SYNONYMOUS	7	missense	0.58	0.11
11_75282920_G_C	11	75282920	rs150431930	G	C	E G	PASS	PASS	p.Ser350Thr	p.Ser350Thr	c.1049G>C	missense		9	277100	0	0.03248	0	24018	0	0	10148	0	0	18862	0	0	25794	0	9	126614	0	0	34416	0	0	6466	0	0	30782	0	TRUE	TRUE	CodingTranscript	NON_SYNONYMOUS	7	missense	0.58	0.11
11_75282921_C_T	11	75282921	rs750465183	C	T	E G	PASS	PASS	p.Ser350Ser	p.Ser350Ser	c.1050C>T	synonymous		5	277062	0	0.01805	2	24016	0	0	10146	0	0	18860	0	0	25790	0	2	126594	0	1	34414	0	0	6462	0	0	30780	0	FALSE	TRUE	CodingTranscript	SYNONYMOUS	5	synonymous	0.58	0.11
11_75282922_G_A	11	75282922	rs368336245	G	A	E G	PASS	PASS	p.Val351Met	p.Val351Met	c.1051G>A	missense		2	277084	0	0.007218	0	24020	0	0	10148	0	0	18858	0	0	25790	0	1	126604	0	0	34416	0	1	6466	0	0	30782	0	FALSE	TRUE	CodingTranscript	NON_SYNONYMOUS	7	missense	0.58	0.11
11_75282926_T_A	11	75282926	.	T	A	E	PASS	NA	p.Phe352Tyr	p.Phe352Tyr	c.1055T>A	missense		2	246138	0	0.008126	0	15292	0	0	9846	0	0	17240	0	2	22294	0	0	111624	0	0	33576	0	0	5484	0	0	30782	0	TRUE	TRUE	CodingTranscript	NON_SYNONYMOUS	7	missense	0.59	0.12
11_75282929_A_G	11	75282929	rs780318111	A	G	E	PASS	NA	p.His353Arg	p.His353Arg	c.1058A>G	missense		1	246134	0	0.004063	0	15290	0	0	9846	0	0	17242	0	0	22296	0	1	111618	0	0	33578	0	0	5484	0	0	30780	0	FALSE	TRUE	CodingTranscript	NON_SYNONYMOUS	7	missense	0.59	0.12
11_75282930_C_T	11	75282930	rs199548932	C	T	E G	PASS	PASS	p.His353His	p.His353His	c.1059C>T	synonymous		17	277064	0	0.06136	0	24014	0	0	10150	0	0	18864	0	0	25790	0	17	126590	0	0	34416	0	0	6462	0	0	30778	0	FALSE	TRUE	CodingTranscript	SYNONYMOUS	5	synonymous	0.60	0.12
11_75282931_G_A	11	75282931	rs369550626	G	A	E G	PASS	PASS	p.Ala354Thr	p.Ala354Thr	c.1060G>A	missense		3	277062	0	0.01083	1	24016	0	0	10150	0	0	18862	0	0	25786	0	2	126586	0	0	34416	0	0	6464	0	0	30782	0	FALSE	TRUE	CodingTranscript	NON_SYNONYMOUS	7	missense	0.60	0.12
11_75282932_C_G	11	75282932	.	C	G	E	PASS	NA	p.Ala354Gly	p.Ala354Gly	c.1061C>G	missense		1	246134	0	0.004063	0	15292	0	0	9846	0	0	17240	0	0	22296	0	0	111622	0	1	33576	0	0	5480	0	0	30782	0	TRUE	TRUE	CodingTranscript	NON_SYNONYMOUS	7	missense	0.60	0.12
11_75282936_C_T	11	75282936	rs554388551	C	T	E G	PASS	PASS	p.Thr355Thr	p.Thr355Thr	c.1065C>T	synonymous		6	277076	0	0.02165	1	24020	0	0	10148	0	0	18862	0	0	25788	0	2	126596	0	2	34416	0	0	6466	0	1	30780	0	FALSE	TRUE	CodingTranscript	SYNONYMOUS	5	synonymous	0.60	0.12
11_75282937_G_A	11	75282937	rs747912977	G	A	E	PASS	NA	p.Ala356Thr	p.Ala356Thr	c.1066G>A	missense		4	246114	0	0.01625	0	15292	0	0	9842	0	0	17238	0	0	22290	0	4	111608	0	0	33578	0	0	5484	0	0	30782	0	FALSE	TRUE	CodingTranscript	NON_SYNONYMOUS	7	missense	0.60	0.12
11_75282948_G_C	11	75282948	rs771997683	G	C	E	PASS	NA	p.Leu359Phe	p.Leu359Phe	c.1077G>C	missense		1	246126	0	0.004063	0	15282	0	0	9844	0	0	17244	0	0	22290	0	1	111620	0	0	33580	0	0	5484	0	0	30782	0	TRUE	TRUE	CodingTranscript	NON_SYNONYMOUS	7	missense	0.62	0.13
11_75282957_T_A	11	75282957	.	T	A	G	NA	PASS	p.Asp362Glu	p.Asp362Glu	c.1086T>A	missense		1	30946	0	0.03231	0	8722	0	0	302	0	0	1622	0	0	3494	0	1	14986	0	0	838	0	0	982	0	0	0	0	TRUE	TRUE	CodingTranscript	NON_SYNONYMOUS	7	missense	0.62	0.13
11_75282963_C_T	11	75282963	.	C	T	E	PASS	NA	p.Asn364Asn	p.Asn364Asn	c.1092C>T	synonymous		1	246128	0	0.004063	1	15292	0	0	9844	0	0	17244	0	0	22288	0	0	111612	0	0	33580	0	0	5486	0	0	30782	0	FALSE	TRUE	CodingTranscript	SYNONYMOUS	5	synonymous	0.61	0.12
11_75282965_C_T	11	75282965	rs574281910	C	T	E	PASS	NA	p.Pro365Leu	p.Pro365Leu	c.1094C>T	missense		1	246120	0	0.004063	1	15290	0	0	9842	0	0	17244	0	0	22286	0	0	111610	0	0	33580	0	0	5486	0	0	30782	0	FALSE	TRUE	CodingTranscript	NON_SYNONYMOUS	7	missense	0.60	0.12
11_75282966_C_T	11	75282966	.	C	T	E	PASS	NA	p.Pro365Pro	p.Pro365Pro	c.1095C>T	synonymous		1	246110	0	0.004063	1	15282	0	0	9842	0	0	17244	0	0	22286	0	0	111608	0	0	33580	0	0	5486	0	0	30782	0	FALSE	TRUE	CodingTranscript	SYNONYMOUS	5	synonymous	0.61	0.12
11_75282968_T_C	11	75282968	rs747009311	T	C	E	PASS	NA	p.Phe366Ser	p.Phe366Ser	c.1097T>C	missense		1	246114	0	0.004063	0	15290	0	0	9844	0	0	17240	0	0	22288	0	1	111608	0	0	33578	0	0	5484	0	0	30782	0	FALSE	TRUE	CodingTranscript	NON_SYNONYMOUS	7	missense	0.61	0.12
11_75282980_T_C	11	75282980	rs758312076	T	C	E	PASS	NA	p.Ile370Thr	p.Ile370Thr	c.1109T>C	missense		3	246090	0	0.01219	0	15284	0	0	9844	0	0	17240	0	0	22284	0	3	111594	0	0	33578	0	0	5484	0	0	30782	0	FALSE	TRUE	CodingTranscript	NON_SYNONYMOUS	7	missense	0.62	0.13
11_75282984_C_T	11	75282984	rs533870576	C	T	E	PASS	NA	p.Tyr371Tyr	p.Tyr371Tyr	c.1113C>T	synonymous		16	246050	0	0.06503	0	15284	0	0	9842	0	1	17238	0	0	22270	0	2	111572	0	12	33580	0	0	5486	0	1	30778	0	FALSE	TRUE	CodingTranscript	SYNONYMOUS	5	synonymous	0.62	0.13
11_75282985_G_A	11	75282985	rs200180052	G	A	E	PASS	NA	p.Gly372Arg	p.Gly372Arg	c.1114G>A	missense		9	246048	0	0.03658	0	15282	0	0	9842	0	0	17240	0	0	22278	0	5	111566	0	1	33578	0	0	5484	0	3	30778	0	FALSE	TRUE	CodingTranscript	NON_SYNONYMOUS	7	missense	0.61	0.13
11_75282988_C_T	11	75282988	rs764873155	C	T	E	PASS	NA	p.Arg373Cys	p.Arg373Cys	c.1117C>T	missense		4	246048	0	0.01626	1	15282	0	0	9844	0	0	17242	0	0	22274	0	3	111562	0	0	33578	0	0	5484	0	0	30782	0	FALSE	TRUE	CodingTranscript	NON_SYNONYMOUS	7	missense	0.62	0.15
11_75282989_G_A	11	75282989	rs774719472	G	A	E G	PASS	PASS	p.Arg373His	p.Arg373His	c.1118G>A	missense		2	276952	0	0.007221	2	24010	0	0	10148	0	0	18864	0	0	25756	0	0	126510	0	0	34416	0	0	6466	0	0	30782	0	FALSE	TRUE	CodingTranscript	NON_SYNONYMOUS	7	missense	0.62	0.15
11_75282990_C_T	11	75282990	rs375913094	C	T	E G	PASS	PASS	p.Arg373Arg	p.Arg373Arg	c.1119C>T	synonymous		44	276966	0	0.0001589	0	24012	0	0	10144	0	0	18864	0	0	25760	0	42	126524	0	1	34416	0	0	6468	0	1	30778	0	FALSE	TRUE	CodingTranscript	SYNONYMOUS	5	synonymous	0.63	0.15
11_75282991_G_A	11	75282991	rs768025277	G	A	E	PASS	NA	p.Glu374Lys	p.Glu374Lys	c.1120G>A	missense		5	246030	0	0.02032	2	15288	0	0	9844	0	0	17244	0	0	22266	0	0	111542	0	0	33578	0	0	5486	0	3	30782	0	FALSE	TRUE	CodingTranscript	NON_SYNONYMOUS	7	missense	0.62	0.15
11_75282993_G_C	11	75282993	rs750860974	G	C	E	PASS	NA	p.Glu374Asp	p.Glu374Asp	c.1122G>C	missense		1	246044	0	0.004064	0	15290	0	0	9844	0	0	17240	0	0	22276	0	0	111550	0	0	33580	0	0	5484	0	1	30780	0	TRUE	TRUE	CodingTranscript	NON_SYNONYMOUS	7	missense	0.62	0.15
11_75282994_G_A	11	75282994	rs577035420	G	A	E	PASS	NA	p.Glu375Lys	p.Glu375Lys	c.1123G>A	missense		1	246030	0	0.004065	0	15288	0	0	9844	0	0	17244	0	0	22266	0	0	111544	0	0	33578	0	0	5486	0	1	30780	0	FALSE	TRUE	CodingTranscript	NON_SYNONYMOUS	7	missense	0.62	0.15
11_75282994_G_T	11	75282994	rs577035420	G	T	E	PASS	NA	p.Glu375Ter	p.Glu375Ter	c.1123G>T	stop gained		1	246030	0	0.004065	0	15288	0	0	9844	0	0	17244	0	0	22266	0	0	111544	0	0	33578	0	0	5486	0	1	30780	0	TRUE	TRUE	CodingTranscript	STOP_GAINED	8	stop_gained	0.62	0.15
11_75282995_A_T	11	75282995	rs545800102	A	T	E	PASS	NA	p.Glu375Val	p.Glu375Val	c.1124A>T	missense		1	246036	0	0.004064	0	15288	0	0	9840	0	0	17242	0	0	22268	0	0	111556	0	0	33576	0	0	5486	0	1	30780	0	TRUE	TRUE	CodingTranscript	NON_SYNONYMOUS	7	missense	0.62	0.15
11_75282996_G_A	11	75282996	rs562306544	G	A	E	PASS	NA	p.Glu375Glu	p.Glu375Glu	c.1125G>A	synonymous		1	246038	0	0.004064	0	15288	0	0	9844	0	0	17242	0	0	22276	0	0	111548	0	0	33574	0	0	5486	0	1	30780	0	FALSE	TRUE	CodingTranscript	SYNONYMOUS	5	synonymous	0.62	0.15
11_75282996_G_T	11	75282996	rs562306544	G	T	E	PASS	NA	p.Glu375Asp	p.Glu375Asp	c.1125G>T	missense		1	246038	0	0.004064	0	15288	0	0	9844	0	0	17242	0	0	22276	0	1	111548	0	0	33574	0	0	5486	0	0	30780	0	TRUE	TRUE	CodingTranscript	NON_SYNONYMOUS	7	missense	0.62	0.15
11_75283000_C_T	11	75283000	rs576211302	C	T	E	PASS	NA	p.Arg377Cys	p.Arg377Cys	c.1129C>T	missense		2	246014	0	8.13e-6	0	15286	0	0	9842	0	0	17244	0	0	22266	0	2	111534	0	0	33580	0	0	5486	0	0	30776	0	FALSE	TRUE	CodingTranscript	NON_SYNONYMOUS	7	missense	0.61	0.13
11_75283001_G_A	11	75283001	rs779029499	G	A	E	PASS	NA	p.Arg377His	p.Arg377His	c.1130G>A	missense		2	245958	0	0.008131	0	15292	0	0	9838	0	0	17234	0	0	22254	0	1	111506	0	1	33574	0	0	5484	0	0	30776	0	FALSE	TRUE	CodingTranscript	NON_SYNONYMOUS	7	missense	0.61	0.13
11_75283002_C_T	11	75283002	.	C	T	E	PASS	NA	p.Arg377Arg	p.Arg377Arg	c.1131C>T	synonymous		1	245994	0	0.004065	0	15288	0	0	9842	0	0	17240	0	0	22262	0	0	111526	0	0	33576	0	0	5482	0	1	30778	0	FALSE	TRUE	CodingTranscript	SYNONYMOUS	5	synonymous	0.62	0.13
11_75283008_C_T	11	75283008	rs752498002	C	T	E	PASS	NA	p.Pro379Pro	p.Pro379Pro	c.1137C>T	synonymous		2	246008	0	8.13e-6	0	15294	0	0	9842	0	0	17242	0	0	22248	0	2	111548	0	0	33576	0	0	5478	0	0	30780	0	FALSE	TRUE	CodingTranscript	SYNONYMOUS	5	synonymous	0.60	0.12
11_75283009_A_C	11	75283009	.	A	C	E	PASS	NA	p.Lys380Gln	p.Lys380Gln	c.1138A>C	missense		1	246014	0	0.004065	0	15288	0	0	9842	0	0	17240	0	0	22252	0	1	111554	0	0	33578	0	0	5480	0	0	30780	0	TRUE	TRUE	CodingTranscript	NON_SYNONYMOUS	7	missense	0.60	0.12
11_75283012_C_G	11	75283012	.	C	G	E	PASS	NA	p.Leu381Val	p.Leu381Val	c.1141C>G	missense		1	245990	0	0.004065	0	15292	0	0	9840	0	0	17240	0	0	22250	0	0	111532	0	0	33578	0	0	5480	0	1	30778	0	TRUE	TRUE	CodingTranscript	NON_SYNONYMOUS	7	missense	0.61	0.12
11_75283017_C_T	11	75283017	rs777673772	C	T	E	PASS	NA	p.Phe382Phe	p.Phe382Phe	c.1146C>T	synonymous		1	245960	0	0.004066	0	15284	0	0	9842	0	0	17238	0	0	22230	0	1	111532	0	0	33580	0	0	5480	0	0	30774	0	FALSE	TRUE	CodingTranscript	SYNONYMOUS	5	synonymous	0.61	0.12
11_75283018_T_A	11	75283018	rs746933828	T	A	E	PASS	NA	p.Tyr383Asn	p.Tyr383Asn	c.1147T>A	missense		1	246012	0	0.004065	0	15292	0	0	9844	0	0	17238	0	0	22246	0	1	111558	0	0	33580	0	0	5478	0	0	30776	0	TRUE	TRUE	CodingTranscript	NON_SYNONYMOUS	7	missense	0.62	0.12
11_75283020_C_T	11	75283020	rs201843800	C	T	E G	PASS	PASS	p.Tyr383Tyr	p.Tyr383Tyr	c.1149C>T	synonymous		9	276908	0	3.25e-5	0	24008	0	0	10148	0	0	18856	0	0	25728	0	2	126522	0	7	34412	0	0	6462	0	0	30772	0	FALSE	TRUE	CodingTranscript	SYNONYMOUS	5	synonymous	0.62	0.13
11_75283021_G_A	11	75283021	rs200974428	G	A	E G	PASS	PASS	p.Ala384Thr	p.Ala384Thr	c.1150G>A	missense		5	276868	0	0.01806	0	24010	0	0	10146	0	0	18856	0	0	25726	0	3	126488	0	0	34410	0	1	6460	0	1	30772	0	FALSE	TRUE	CodingTranscript	NON_SYNONYMOUS	7	missense	0.62	0.13
11_75283023_C_T	11	75283023	rs368586977	C	T	E G	PASS	PASS	p.Ala384Ala	p.Ala384Ala	c.1152C>T	synonymous		16	276892	0	0.05778	0	23994	0	0	10146	0	2	18852	0	0	25722	0	8	126524	0	3	34414	0	0	6466	0	3	30774	0	FALSE	TRUE	CodingTranscript	SYNONYMOUS	5	synonymous	0.63	0.13
11_75283029_C_T	11	75283029	rs769435497	C	T	E	PASS	NA	p.His386His	p.His386His	c.1158C>T	synonymous		1	246008	0	0.004065	0	15282	0	0	9844	0	0	17242	0	0	22244	0	0	111558	0	0	33576	0	0	5486	0	1	30776	0	FALSE	TRUE	CodingTranscript	SYNONYMOUS	5	synonymous	0.62	0.13
11_75283036_A_G	11	75283036	rs775032765	A	G	E	PASS	NA	p.Ile389Val	p.Ile389Val	c.1165A>G	missense		1	246026	0	0.004065	0	15278	0	0	9844	0	0	17240	0	0	22256	0	1	111566	0	0	33576	0	0	5486	0	0	30780	0	FALSE	TRUE	CodingTranscript	NON_SYNONYMOUS	7	missense	0.62	0.13
11_75283042_C_G	11	75283042	.	C	G	E	PASS	NA	p.Leu391Val	p.Leu391Val	c.1171C>G	missense		1	246002	0	0.004065	0	15280	0	0	9844	0	0	17236	0	0	22262	0	0	111542	0	0	33578	0	0	5486	0	1	30774	0	TRUE	TRUE	CodingTranscript	NON_SYNONYMOUS	7	missense	0.62	0.15
11_75283048_C_T	11	75283048	rs527863136	C	T	E	PASS	NA	p.Arg393Trp	p.Arg393Trp	c.1177C>T	missense		7	245926	0	0.02846	1	15266	0	0	9840	0	0	17238	0	0	22264	0	4	111480	0	0	33578	0	1	5486	0	1	30774	0	FALSE	TRUE	CodingTranscript	NON_SYNONYMOUS	7	missense	0.62	0.16
11_75283049_G_A	11	75283049	rs772299825	G	A	E G	PASS	PASS	p.Arg393Gln	p.Arg393Gln	c.1178G>A	missense		6	276842	0	0.02167	3	23988	0	0	10148	0	0	18860	0	0	25750	0	1	126446	0	1	34412	0	1	6464	0	0	30774	0	FALSE	TRUE	CodingTranscript	NON_SYNONYMOUS	7	missense	0.62	0.16
11_75283053_C_T	11	75283053	rs773695492	C	T	E	PASS	NA	p.Asp394Asp	p.Asp394Asp	c.1182C>T	synonymous		1	245988	0	0.004065	0	15274	0	0	9844	0	0	17240	0	0	22262	0	0	111528	0	0	33578	0	0	5484	0	1	30778	0	FALSE	TRUE	CodingTranscript	SYNONYMOUS	5	synonymous	0.61	0.16
11_75283054_A_G	11	75283054	.	A	G	E	PASS	NA	p.Thr395Ala	p.Thr395Ala	c.1183A>G	missense		1	245966	0	0.004066	0	15272	0	0	9842	0	0	17240	0	0	22256	0	1	111516	0	0	33578	0	0	5484	0	0	30778	0	FALSE	TRUE	CodingTranscript	NON_SYNONYMOUS	7	missense	0.61	0.16
11_75283056_C_G	11	75283056	rs761198901	C	G	E	PASS	NA	p.Thr395Thr	p.Thr395Thr	c.1185C>G	synonymous		1	245976	0	0.004065	0	15260	0	0	9842	0	0	17242	0	0	22260	0	1	111532	0	0	33576	0	0	5484	0	0	30780	0	TRUE	TRUE	CodingTranscript	SYNONYMOUS	5	synonymous	0.62	0.16
11_75283056_C_T	11	75283056	rs761198901	C	T	E	PASS	NA	p.Thr395Thr	p.Thr395Thr	c.1185C>T	synonymous		7	245976	0	0.02846	0	15260	0	0	9842	0	0	17242	0	0	22260	0	0	111532	0	6	33576	0	0	5484	0	1	30780	0	FALSE	TRUE	CodingTranscript	SYNONYMOUS	5	synonymous	0.62	0.16
11_75283059_A_G	11	75283059	rs753920797	A	G	E	PASS	NA	p.Gln396Gln	p.Gln396Gln	c.1188A>G	synonymous		3	245972	0	1.22e-5	0	15268	0	0	9842	0	0	17240	0	0	22262	0	3	111522	0	0	33576	0	0	5484	0	0	30778	0	FALSE	TRUE	CodingTranscript	SYNONYMOUS	5	synonymous	0.63	0.16
11_75283062_C_T	11	75283062	rs371506866	C	T	E	PASS	NA	p.Ser397Ser	p.Ser397Ser	c.1191C>T	synonymous		6	245882	1	2.44e-5	0	15258	0	0	9836	0	0	17238	0	0	22244	0	4	111482	0	0	33572	0	2	5478	1	0	30774	0	FALSE	TRUE	CodingTranscript	SYNONYMOUS	5	synonymous	0.62	0.15
11_75283063_G_A	11	75283063	.	G	A	E	PASS	NA	p.Gly398Ser	p.Gly398Ser	c.1192G>A	missense		3	245934	0	1.22e-5	0	15266	0	0	9838	0	1	17240	0	0	22258	0	0	111504	0	0	33576	0	0	5478	0	2	30774	0	FALSE	TRUE	CodingTranscript	NON_SYNONYMOUS	7	missense	0.62	0.15
11_75283064_G_T	11	75283064	rs765402376	G	T	E	PASS	NA	p.Gly398Val	p.Gly398Val	c.1193G>T	missense		1	245912	0	0.004066	0	15268	0	0	9834	0	0	17240	0	0	22246	0	1	111498	0	0	33576	0	0	5474	0	0	30776	0	TRUE	TRUE	CodingTranscript	NON_SYNONYMOUS	7	missense	0.62	0.13
11_75283067_C_A	11	75283067	rs376520307	C	A	E	PASS	NA	p.Ser399Tyr	p.Ser399Tyr	c.1196C>A	missense		1	245910	0	0.004067	0	15252	0	0	9834	0	0	17240	0	0	22262	0	1	111494	0	0	33576	0	0	5476	0	0	30776	0	TRUE	TRUE	CodingTranscript	NON_SYNONYMOUS	7	missense	0.61	0.12
11_75283067_C_T	11	75283067	rs376520307	C	T	E	PASS	NA	p.Ser399Phe	p.Ser399Phe	c.1196C>T	missense		2	245910	0	0.008133	0	15252	0	0	9834	0	0	17240	0	0	22262	0	2	111494	0	0	33576	0	0	5476	0	0	30776	0	FALSE	TRUE	CodingTranscript	NON_SYNONYMOUS	7	missense	0.61	0.12
11_75283070_T_A	11	75283070	.	T	A	E	PASS	NA	p.Leu400Gln	p.Leu400Gln	c.1199T>A	missense		1	245884	0	0.004067	0	15246	0	0	9838	0	0	17240	0	0	22254	0	1	111488	0	0	33572	0	0	5472	0	0	30774	0	TRUE	TRUE	CodingTranscript	NON_SYNONYMOUS	7	missense	0.61	0.12
11_75283074_A_G	11	75283074	rs752843216	A	G	E G	PASS	PASS	p.Leu401Leu	p.Leu401Leu	c.1203A>G	synonymous		2	276822	0	0.007225	0	23986	0	0	10142	0	0	18862	0	0	25744	0	0	126448	0	0	34412	0	1	6454	0	1	30774	0	FALSE	TRUE	CodingTranscript	SYNONYMOUS	5	synonymous	0.61	0.12
11_75283078_A_G	11	75283078	rs758706956	A	G	E	PASS	NA	p.Ile403Val	p.Ile403Val	c.1207A>G	missense		7	245940	0	0.02846	0	15260	0	0	9844	0	0	17238	0	0	22266	0	0	111498	0	0	33578	0	0	5478	0	7	30778	0	FALSE	TRUE	CodingTranscript	NON_SYNONYMOUS	7	missense	0.60	0.11
11_75283079_T_C	11	75283079	rs201566218	T	C	E G	PASS	PASS	p.Ile403Thr	p.Ile403Thr	c.1208T>C	missense		24	276850	0	0.08669	0	23976	0	0	10144	0	2	18858	0	0	25754	0	10	126472	0	5	34414	0	0	6456	0	7	30776	0	FALSE	TRUE	CodingTranscript	NON_SYNONYMOUS	7	missense	0.60	0.11
11_75283084_C_T	11	75283084	rs757124438	C	T	E	PASS	NA	p.Arg405Cys	p.Arg405Cys	c.1213C>T	missense		1	245874	0	0.004067	0	15256	0	0	9844	0	0	17234	0	0	22264	0	1	111450	0	0	33570	0	0	5476	0	0	30780	0	FALSE	TRUE	CodingTranscript	NON_SYNONYMOUS	7	missense	0.60	0.11
11_75283085_G_A	11	75283085	rs781125078	G	A	E	PASS	NA	p.Arg405His	p.Arg405His	c.1214G>A	missense		2	245834	0	0.008136	0	15252	0	0	9840	0	0	17238	0	0	22264	0	2	111418	0	0	33570	0	0	5476	0	0	30776	0	FALSE	TRUE	CodingTranscript	NON_SYNONYMOUS	7	missense	0.60	0.11
11_75283090_G_C	11	75283090	rs138241050	G	C	E G	PASS	PASS	p.Val407Leu	p.Val407Leu	c.1219G>C	missense		115	276826	0	0.0004154	109	23970	0	0	10140	0	0	18858	0	0	25766	0	1	126442	0	4	34412	0	1	6458	0	0	30780	0	TRUE	TRUE	CodingTranscript	NON_SYNONYMOUS	7	missense	0.60	0.11
11_75283093_C_A	11	75283093	rs769154335	C	A	E	PASS	NA	p.Arg408Arg	p.Arg408Arg	c.1222C>A	synonymous		1	245856	0	0.004067	0	15248	0	0	9838	0	0	17240	0	0	22270	0	0	111430	0	0	33574	0	0	5476	0	1	30780	0	TRUE	TRUE	CodingTranscript	SYNONYMOUS	5	synonymous	0.60	0.11
11_75283093_C_T	11	75283093	rs769154335	C	T	E	PASS	NA	p.Arg408Trp	p.Arg408Trp	c.1222C>T	missense		7	245856	0	0.02847	0	15248	0	0	9838	0	0	17240	0	0	22270	0	1	111430	0	4	33574	0	0	5476	0	2	30780	0	FALSE	TRUE	CodingTranscript	NON_SYNONYMOUS	7	missense	0.60	0.11
11_75283094_G_A	11	75283094	rs371699925	G	A	E G	PASS	PASS	p.Arg408Gln	p.Arg408Gln	c.1223G>A	missense		9	276780	0	0.03252	0	23976	0	0	10138	0	0	18852	0	1	25756	0	1	126416	0	4	34408	0	0	6456	0	3	30778	0	FALSE	TRUE	CodingTranscript	NON_SYNONYMOUS	7	missense	0.60	0.11
11_75283095_G_C	11	75283095	rs768360780	G	C	E	PASS	NA	p.Arg408Arg	p.Arg408Arg	c.1224G>C	synonymous		1	245830	0	0.004068	0	15254	0	0	9840	0	1	17236	0	0	22264	0	0	111418	0	0	33568	0	0	5472	0	0	30778	0	TRUE	TRUE	CodingTranscript	SYNONYMOUS	5	synonymous	0.61	0.11
11_75283096_C_G	11	75283096	.	C	G	E	PASS	NA	p.Pro409Ala	p.Pro409Ala	c.1225C>G	missense		1	245868	0	0.004067	0	15248	0	0	9842	0	0	17238	0	0	22274	0	1	111444	0	0	33568	0	0	5476	0	0	30778	0	TRUE	TRUE	CodingTranscript	NON_SYNONYMOUS	7	missense	0.60	0.09
11_75283099_A_G	11	75283099	rs773655408	A	G	E	PASS	NA	p.Lys410Glu	p.Lys410Glu	c.1228A>G	missense		8	245874	0	0.03254	0	15254	0	0	9834	0	0	17236	0	0	22274	0	0	111448	0	8	33574	0	0	5474	0	0	30780	0	FALSE	TRUE	CodingTranscript	NON_SYNONYMOUS	7	missense	0.60	0.08
11_75283105_G_A	11	75283105	rs761143786	G	A	E	PASS	NA	p.Asp412Asn	p.Asp412Asn	c.1234G>A	missense		1	245782	0	0.004069	0	15238	0	0	9832	0	0	17236	0	0	22272	0	0	111394	0	0	33568	0	0	5466	0	1	30776	0	FALSE	TRUE	CodingTranscript	NON_SYNONYMOUS	7	missense	0.59	0.08
11_75283107_C_G	11	75283107	rs200334001	C	G	E G	PASS	PASS	p.Asp412Glu	p.Asp412Glu	c.1236C>G	missense		11	276718	0	0.03975	0	23956	0	0	10136	0	0	18858	0	0	25758	0	7	126374	0	2	34408	0	2	6448	0	0	30780	0	TRUE	TRUE	CodingTranscript	NON_SYNONYMOUS	7	missense	0.58	0.08
11_75283109_A_G	11	75283109	rs777250907	A	G	E	PASS	NA	p.Lys413Arg	p.Lys413Arg	c.1238A>G	missense		1	245810	0	0.004068	0	15236	0	0	9834	0	1	17238	0	0	22270	0	0	111412	0	0	33572	0	0	5468	0	0	30780	0	FALSE	TRUE	CodingTranscript	NON_SYNONYMOUS	7	missense	0.58	0.08
11_75283114_C_A	11	75283114	rs149137596	C	A	G	NA	PASS	p.Arg415Arg	p.Arg415Arg	c.1243C>A	synonymous		1	30930	0	0.03233	0	8722	0	0	300	0	0	1622	0	0	3494	0	1	14972	0	0	838	0	0	982	0	0	0	0	TRUE	TRUE	CodingTranscript	SYNONYMOUS	5	synonymous	0.60	0.08
11_75283114_C_G	11	75283114	rs149137596	C	G	G	NA	PASS	p.Arg415Gly	p.Arg415Gly	c.1243C>G	missense		1	30930	0	0.03233	1	8722	0	0	300	0	0	1622	0	0	3494	0	0	14972	0	0	838	0	0	982	0	0	0	0	TRUE	TRUE	CodingTranscript	NON_SYNONYMOUS	7	missense	0.60	0.08
11_75283115_G_A	11	75283115	rs760141322	G	A	E	PASS	NA	p.Arg415Gln	p.Arg415Gln	c.1244G>A	missense		2	245664	0	0.008141	0	15230	0	0	9828	0	0	17236	0	0	22252	0	1	111306	0	0	33560	0	0	5472	0	1	30780	0	FALSE	TRUE	CodingTranscript	NON_SYNONYMOUS	7	missense	0.60	0.08
11_75283119_C_G	11	75283119	rs145015985	C	G	E	PASS	NA	p.Asp416Glu	p.Asp416Glu	c.1248C>G	missense		1	245558	0	0.004072	0	15200	0	0	9830	0	1	17230	0	0	22250	0	0	111240	0	0	33560	0	0	5474	0	0	30774	0	TRUE	TRUE	CodingTranscript	NON_SYNONYMOUS	7	missense	0.59	0.08
11_75283119_C_T	11	75283119	rs145015985	C	T	E G	PASS	PASS	p.Asp416Asp	p.Asp416Asp	c.1248C>T	synonymous		8	276486	0	0.02893	3	23924	0	0	10132	0	2	18852	0	0	25744	0	1	126206	0	0	34398	0	0	6456	0	2	30774	0	FALSE	TRUE	CodingTranscript	SYNONYMOUS	5	synonymous	0.59	0.08
11_75283120_G_A	11	75283120	.	G	A	G	NA	PASS	p.Glu417Lys	p.Glu417Lys	c.1249G>A	missense		1	30920	0	0.03234	0	8722	0	0	302	0	0	1622	0	0	3494	0	1	14960	0	0	838	0	0	982	0	0	0	0	FALSE	TRUE	CodingTranscript	NON_SYNONYMOUS	7	missense	0.60	0.08
11_75283131_C_T	11	75283131	rs377537840	C	T	E G	PASS	PASS			c.*3C>T	3' UTR		8	275860	0	2.9e-5	6	23772	0	0	10112	0	0	18846	0	0	25688	0	0	125828	0	1	34396	0	1	6444	0	0	30774	0	FALSE	TRUE	Transcript	3PRIME_UTR	2	3_prime_UTR	0.60	0.07
11_75283132_C_G	11	75283132	rs550152153	C	G	E G	PASS	PASS			c.*4C>G	3' UTR		112	275888	1	0.0004060	0	23790	0	0	10112	0	0	18848	0	0	25696	0	15	125828	0	0	34396	0	0	6446	0	97	30772	1	TRUE	TRUE	Transcript	3PRIME_UTR	2	3_prime_UTR	0.60	0.07
11_75283134_CAG_C	11	75283134	.	CAG	C	E	PASS	NA			c.*7_*8delAG	3' UTR		1	244836	0	0.004084	0	15052	0	0	9798	0	0	17226	0	1	22192	0	0	110780	0	0	33562	0	0	5458	0	0	30768	0	NA	TRUE	Transcript	3PRIME_UTR	2	3_prime_UTR,feature_truncation	0.60	0.07
11_75283137_G_A	11	75283137	.	G	A	G	NA	PASS			c.*9G>A	3' UTR		1	30914	0	0.03235	0	8718	0	0	302	0	0	1622	0	0	3494	0	1	14960	0	0	838	0	0	980	0	0	0	0	FALSE	TRUE	Transcript	3PRIME_UTR	2	3_prime_UTR	0.60	0.07
11_75283140_G_A	11	75283140	rs746898179	G	A	E G	PASS	PASS			c.*12G>A	3' UTR		7	275446	0	0.02541	1	23724	0	0	10096	0	0	18838	0	0	25640	0	6	125568	0	0	34386	0	0	6440	0	0	30754	0	FALSE	TRUE	Transcript	3PRIME_UTR	2	3_prime_UTR	0.60	0.05
11_75283146_A_AGGAT	11	75283146	rs757075129	A	AGGAT	E	PASS	NA			c.*21_*24dupATGG	3' UTR		4	243880	0	1.64e-5	0	14892	0	0	9780	0	0	17208	0	0	22066	0	4	110232	0	0	33534	0	0	5446	0	0	30722	0	NA	TRUE	Transcript	3PRIME_UTR	2	3_prime_UTR,feature_elongation	0.60	0.05
11_75283146_A_G	11	75283146	rs757075129	A	G	E	PASS	NA			c.*18A>G	3' UTR		1	243880	0	4.1e-6	0	14892	0	0	9780	0	1	17208	0	0	22066	0	0	110232	0	0	33534	0	0	5446	0	0	30722	0	FALSE	TRUE	Transcript	3PRIME_UTR	2	3_prime_UTR	0.60	0.05
11_75283163_C_T	11	75283163	rs569709941	C	T	E G	PASS	PASS			c.*35C>T	3' UTR		20	270904	0	0.07383	0	23046	0	0	9984	0	0	18666	0	0	25126	0	0	123064	0	0	34164	0	1	6354	0	19	30500	0	FALSE	TRUE	Transcript	3PRIME_UTR	2	3_prime_UTR	0.59	0.04
11_75283164_C_G	11	75283164	rs756132470	C	G	E	PASS	NA			c.*36C>G	3' UTR		3	239914	0	1.25e-5	0	14346	0	0	9676	0	3	17020	0	0	21604	0	0	108098	0	0	33320	0	0	5370	0	0	30480	0	TRUE	TRUE	Transcript	3PRIME_UTR	2	3_prime_UTR	0.60	0.04
11_75283199_T_TG	11	75283199	rs770329618	T	TG	G	NA	PASS			c.*78dupG	3' UTR		12	29826	0	0.0004023	0	8442	0	8	292	0	0	1600	0	0	3366	0	3	14370	0	1	816	0	0	940	0	0	0	0	NA	TRUE	Transcript	3PRIME_UTR	2	3_prime_UTR,feature_elongation	0.61	0.03
11_75283201_G_C	11	75283201	.	G	C	G	NA	PASS			c.*73G>C	3' UTR		5	30872	0	0.0001620	0	8710	0	0	302	0	0	1620	0	4	3488	0	1	14938	0	0	836	0	0	978	0	0	0	0	TRUE	TRUE	Transcript	3PRIME_UTR	2	3_prime_UTR	0.61	0.03
11_75283202_G_A	11	75283202	rs116470636	G	A	G	NA	PASS			c.*74G>A	3' UTR		31	30890	0	0.001004	31	8712	0	0	302	0	0	1620	0	0	3494	0	0	14946	0	0	838	0	0	978	0	0	0	0	FALSE	TRUE	Transcript	3PRIME_UTR	2	3_prime_UTR	0.62	0.03
11_75283202_G_C	11	75283202	rs116470636	G	C	G	NA	PASS			c.*74G>C	3' UTR		31	30890	0	0.001004	28	8712	0	0	302	0	0	1620	0	0	3494	0	3	14946	0	0	838	0	0	978	0	0	0	0	TRUE	TRUE	Transcript	3PRIME_UTR	2	3_prime_UTR	0.62	0.03
11_75283202_G_T	11	75283202	rs116470636	G	T	G	NA	PASS			c.*74G>T	3' UTR		36	30890	0	0.001165	35	8712	0	0	302	0	0	1620	0	0	3494	0	1	14946	0	0	838	0	0	978	0	0	0	0	TRUE	TRUE	Transcript	3PRIME_UTR	2	3_prime_UTR	0.62	0.03
11_75283204_G_A	11	75283204	.	G	A	G	NA	PASS			c.*76G>A	3' UTR		1	30882	0	0.03238	1	8706	0	0	302	0	0	1620	0	0	3494	0	0	14944	0	0	838	0	0	978	0	0	0	0	FALSE	TRUE	Transcript	3PRIME_UTR	2	3_prime_UTR	0.62	0.03
11_75283234_A_C	11	75283234	.	A	C	G	NA	PASS			c.*106A>C	3' UTR		1	30778	0	0.03249	1	8662	0	0	300	0	0	1614	0	0	3482	0	0	14904	0	0	838	0	0	978	0	0	0	0	TRUE	TRUE	Transcript	3PRIME_UTR	2	3_prime_UTR	0.59	0.04
11_75283245_G_A	11	75283245	rs184623179	G	A	G	NA	PASS			c.*117G>A	3' UTR		37	30864	0	0.001199	37	8688	0	0	302	0	0	1622	0	0	3492	0	0	14950	0	0	836	0	0	974	0	0	0	0	FALSE	TRUE	Transcript	3PRIME_UTR	2	3_prime_UTR	0.60	0.04
11_75283247_G_A	11	75283247	.	G	A	G	NA	PASS			c.*119G>A	3' UTR		1	30854	0	0.03241	0	8682	0	0	300	0	0	1620	0	0	3494	0	1	14944	0	0	838	0	0	976	0	0	0	0	FALSE	TRUE	Transcript	3PRIME_UTR	2	3_prime_UTR	0.60	0.04
11_75283253_A_G	11	75283253	rs9175	A	G	G	NA	PASS			c.*125A>G	3' UTR		11978	30690	2761	0.3903	1326	8628	101	150	300	34	296	1612	30	1559	3490	348	7963	14862	2110	250	830	33	434	968	105	0	0	0	FALSE	TRUE	Transcript	3PRIME_UTR	2	3_prime_UTR	0.59	0.04
11_75283258_C_A	11	75283258	.	C	A	G	NA	PASS			c.*130C>A	3' UTR		2	30886	0	0.06475	2	8702	0	0	302	0	0	1620	0	0	3492	0	0	14952	0	0	838	0	0	980	0	0	0	0	TRUE	TRUE	Transcript	3PRIME_UTR	2	3_prime_UTR	0.60	0.04
11_75283263_G_A	11	75283263	.	G	A	G	NA	PASS			c.*135G>A	3' UTR		3	30878	0	0.09716	3	8704	0	0	300	0	0	1620	0	0	3492	0	0	14948	0	0	836	0	0	978	0	0	0	0	FALSE	TRUE	Transcript	3PRIME_UTR	2	3_prime_UTR	0.59	0.04
11_75283263_G_C	11	75283263	.	G	C	G	NA	PASS			c.*135G>C	3' UTR		1	30878	0	0.03239	0	8704	0	0	300	0	0	1620	0	0	3492	0	1	14948	0	0	836	0	0	978	0	0	0	0	TRUE	TRUE	Transcript	3PRIME_UTR	2	3_prime_UTR	0.59	0.04
11_75283274_C_T	11	75283274	rs568431961	C	T	G	NA	PASS			c.*146C>T	3' UTR		3	30884	0	0.09714	0	8702	0	0	302	0	0	1620	0	0	3492	0	3	14952	0	0	838	0	0	978	0	0	0	0	FALSE	TRUE	Transcript	3PRIME_UTR	2	3_prime_UTR	0.60	0.05
11_75283280_C_T	11	75283280	.	C	T	G	NA	PASS			c.*152C>T	3' UTR		6	30878	0	0.0001943	5	8700	0	0	302	0	0	1620	0	0	3490	0	1	14950	0	0	838	0	0	978	0	0	0	0	FALSE	TRUE	Transcript	3PRIME_UTR	2	3_prime_UTR	0.59	0.05
11_75283281_G_A	11	75283281	rs146501145	G	A	G	NA	PASS			c.*153G>A	3' UTR		50	30878	0	0.001619	2	8694	0	2	302	0	1	1618	0	6	3492	0	38	14956	0	0	838	0	1	978	0	0	0	0	FALSE	TRUE	Transcript	3PRIME_UTR	2	3_prime_UTR	0.58	0.05
11_75283292_G_C	11	75283292	.	G	C	G	NA	PASS			c.*164G>C	3' UTR		3	30904	0	0.09707	2	8706	0	0	302	0	0	1620	0	0	3492	0	1	14968	0	0	838	0	0	978	0	0	0	0	TRUE	TRUE	Transcript	3PRIME_UTR	2	3_prime_UTR	0.59	0.05
11_75283307_A_G	11	75283307	rs557446600	A	G	G	NA	PASS			c.*179A>G	3' UTR		25	30880	0	0.0008096	2	8698	0	0	302	0	0	1622	0	0	3488	0	23	14954	0	0	838	0	0	978	0	0	0	0	FALSE	TRUE	Transcript	3PRIME_UTR	2	3_prime_UTR	0.59	0.05
11_75283322_C_T	11	75283322	.	C	T	G	NA	PASS			c.*194C>T	3' UTR		1	30908	0	0.03235	0	8708	0	0	302	0	0	1618	0	0	3488	0	1	14972	0	0	838	0	0	982	0	0	0	0	FALSE	TRUE	Transcript	3PRIME_UTR	2	3_prime_UTR	0.58	0.05
11_75283327_T_C	11	75283327	.	T	C	G	NA	PASS			c.*199T>C	3' UTR		1	30926	0	0.03234	0	8712	0	0	302	0	0	1622	0	0	3492	0	0	14978	0	1	838	0	0	982	0	0	0	0	FALSE	TRUE	Transcript	3PRIME_UTR	2	3_prime_UTR	0.58	0.05
11_75283342_C_T	11	75283342	.	C	T	G	NA	PASS			c.*214C>T	3' UTR		1	30922	0	0.03234	0	8710	0	0	302	0	0	1622	0	0	3488	0	1	14982	0	0	838	0	0	980	0	0	0	0	FALSE	TRUE	Transcript	3PRIME_UTR	2	3_prime_UTR	0.58	0.04
11_75283344_C_T	11	75283344	rs111736118	C	T	G	NA	PASS			c.*216C>T	3' UTR		35	30900	0	0.001133	32	8698	0	0	302	0	0	1622	0	0	3492	0	3	14970	0	0	838	0	0	978	0	0	0	0	FALSE	TRUE	Transcript	3PRIME_UTR	2	3_prime_UTR	0.58	0.03
11_75283345_G_A	11	75283345	rs376814949	G	A	G	NA	PASS			c.*217G>A	3' UTR		3	30912	0	0.09705	3	8706	0	0	302	0	0	1622	0	0	3492	0	0	14974	0	0	838	0	0	978	0	0	0	0	FALSE	TRUE	Transcript	3PRIME_UTR	2	3_prime_UTR	0.57	0.03
11_75283356_A_G	11	75283356	rs189882479	A	G	G	NA	PASS			c.*228A>G	3' UTR		120	30916	0	0.003881	8	8710	0	0	302	0	0	1620	0	4	3492	0	99	14972	0	4	838	0	5	982	0	0	0	0	FALSE	TRUE	Transcript	3PRIME_UTR	2	3_prime_UTR	0.54	0.01
11_75283390_G_C	11	75283390	.	G	C	G	NA	PASS			c.*262G>C	3' UTR		1	30922	0	0.03234	0	8712	0	0	302	0	0	1620	0	0	3490	0	1	14980	0	0	838	0	0	980	0	0	0	0	TRUE	TRUE	Transcript	3PRIME_UTR	2	3_prime_UTR	0.52	0.01
11_75283424_A_G	11	75283424	.	A	G	G	NA	PASS			c.*296A>G	3' UTR		1	30930	0	0.03233	0	8726	0	0	300	0	1	1622	0	0	3492	0	0	14970	0	0	838	0	0	982	0	0	0	0	FALSE	TRUE	Transcript	3PRIME_UTR	2	3_prime_UTR	0.52	0.00
11_75283459_G_A	11	75283459	rs558945241	G	A	G	NA	PASS			c.*331G>A	3' UTR		1	30930	0	0.03233	0	8712	0	0	302	0	0	1622	0	0	3492	0	1	14982	0	0	838	0	0	982	0	0	0	0	FALSE	TRUE	Transcript	3PRIME_UTR	2	3_prime_UTR	0.52	0.00
11_75283480_G_C	11	75283480	.	G	C	G	NA	PASS			c.*352G>C	3' UTR		1	30928	0	0.03233	1	8716	0	0	302	0	0	1620	0	0	3492	0	0	14980	0	0	838	0	0	980	0	0	0	0	TRUE	TRUE	Transcript	3PRIME_UTR	2	3_prime_UTR	0.50	0.00
11_75283482_G_T	11	75283482	rs541972599	G	T	G	NA	PASS			c.*354G>T	3' UTR		2	30900	0	0.06472	0	8704	0	0	300	0	0	1622	0	0	3490	0	2	14964	0	0	838	0	0	982	0	0	0	0	TRUE	TRUE	Transcript	3PRIME_UTR	2	3_prime_UTR	0.50	0.00
11_75283512_A_G	11	75283512	.	A	G	G	NA	PASS			c.*384A>G	3' UTR		1	30904	0	0.03236	0	8712	0	0	300	0	0	1620	0	0	3492	0	1	14960	0	0	838	0	0	982	0	0	0	0	FALSE	TRUE	Transcript	3PRIME_UTR	2	3_prime_UTR	0.56	0.00
11_75283523_C_A	11	75283523	.	C	A	G	NA	PASS			c.*395C>A	3' UTR		1	30948	0	0.03231	1	8722	0	0	300	0	0	1622	0	0	3490	0	0	14998	0	0	838	0	0	978	0	0	0	0	TRUE	TRUE	Transcript	3PRIME_UTR	2	3_prime_UTR	0.56	0.00
11_75283537_C_G	11	75283537	.	C	G	G	NA	PASS			c.*409C>G	3' UTR		1	30944	0	0.03232	1	8720	0	0	302	0	0	1622	0	0	3488	0	0	14994	0	0	838	0	0	980	0	0	0	0	TRUE	TRUE	Transcript	3PRIME_UTR	2	3_prime_UTR	0.58	0.01
11_75283543_C_T	11	75283543	rs561786704	C	T	G	NA	PASS			c.*415C>T	3' UTR		2	30958	0	6.46e-5	1	8726	0	0	302	0	0	1622	0	0	3490	0	1	15000	0	0	838	0	0	980	0	0	0	0	FALSE	TRUE	Transcript	3PRIME_UTR	2	3_prime_UTR	0.59	0.03
11_75283563_G_C	11	75283563	.	G	C	G	NA	PASS			c.*435G>C	3' UTR		1	30946	0	0.03231	0	8712	0	0	300	0	0	1622	0	1	3490	0	0	15004	0	0	838	0	0	980	0	0	0	0	TRUE	TRUE	Transcript	3PRIME_UTR	2	3_prime_UTR	0.59	0.03
11_75283574_C_T	11	75283574	rs868701658	C	T	G	NA	PASS			c.*446C>T	3' UTR		1	30946	0	0.03231	0	8718	0	0	302	0	0	1622	0	0	3490	0	1	14994	0	0	838	0	0	982	0	0	0	0	FALSE	TRUE	Transcript	3PRIME_UTR	2	3_prime_UTR	0.59	0.03
11_75283588_AC_A	11	75283588	.	AC	A	G	NA	PASS	c.*317-3delCâ€		c.*317-3delC	splice region		8	30926	0	0.0002587	8	8714	0	0	302	0	0	1622	0	0	3490	0	0	14980	0	0	836	0	0	982	0	0	0	0	NA	TRUE	Transcript	3PRIME_UTR	2	3_prime_UTR,feature_truncation	0.62	0.03
11_75283607_C_T	11	75283607	.	C	T	G	NA	PASS			c.*479C>T	3' UTR		1	30934	0	0.03233	1	8722	0	0	302	0	0	1622	0	0	3486	0	0	14982	0	0	838	0	0	982	0	0	0	0	FALSE	TRUE	Transcript	3PRIME_UTR	2	3_prime_UTR	0.59	0.04
11_75283618_G_A	11	75283618	rs12978	G	A	G	NA	PASS			c.*490G>A	3' UTR		828	30930	45	0.02677	813	8720	45	2	302	0	0	1620	0	0	3490	0	3	14980	0	7	836	0	3	982	0	0	0	0	FALSE	TRUE	Transcript	3PRIME_UTR	2	3_prime_UTR	0.60	0.05
11_75283623_G_T	11	75283623	rs141134744	G	T	G	NA	PASS			c.*495G>T	3' UTR		50	30946	0	0.001616	50	8722	0	0	302	0	0	1622	0	0	3490	0	0	14990	0	0	838	0	0	982	0	0	0	0	TRUE	TRUE	Transcript	3PRIME_UTR	2	3_prime_UTR	0.60	0.05
11_75283651_G_A	11	75283651	.	G	A	G	NA	PASS			c.*523G>A	3' UTR		2	30942	0	0.06464	0	8722	0	0	302	0	2	1622	0	0	3486	0	0	14990	0	0	838	0	0	982	0	0	0	0	FALSE	TRUE	Transcript	3PRIME_UTR	2	3_prime_UTR	0.54	0.05
11_75283653_C_A	11	75283653	rs6704	C	A	G	NA	PASS			c.*525C>A	3' UTR		10250	30872	1682	0.3320	2956	8698	493	88	302	9	283	1618	24	1294	3488	235	4999	14956	815	286	830	41	344	980	65	0	0	0	TRUE	TRUE	Transcript	3PRIME_UTR	2	3_prime_UTR	0.54	0.05
11_75283657_C_T	11	75283657	.	C	T	G	NA	PASS			c.*529C>T	3' UTR		1	30946	0	0.03231	1	8726	0	0	302	0	0	1622	0	0	3488	0	0	14988	0	0	838	0	0	982	0	0	0	0	FALSE	TRUE	Transcript	3PRIME_UTR	2	3_prime_UTR	0.53	0.05
11_75283659_C_G	11	75283659	rs374355309	C	G	G	NA	PASS			c.*531C>G	3' UTR		1	30944	0	0.03232	0	8728	0	0	302	0	1	1622	0	0	3486	0	0	14986	0	0	838	0	0	982	0	0	0	0	TRUE	TRUE	Transcript	3PRIME_UTR	2	3_prime_UTR	0.52	0.05
11_75283674_C_T	11	75283674	rs764676785	C	T	G	NA	PASS			c.*546C>T	3' UTR		1	30948	0	0.03231	0	8722	0	0	302	0	0	1622	0	0	3490	0	1	14992	0	0	838	0	0	982	0	0	0	0	FALSE	TRUE	Transcript	3PRIME_UTR	2	3_prime_UTR	0.52	0.05
11_75283684_G_A	11	75283684	rs180685772	G	A	G	NA	PASS			c.*556G>A	3' UTR		21	30952	0	0.0006785	2	8728	0	0	302	0	0	1622	0	3	3492	0	15	14988	0	0	838	0	1	982	0	0	0	0	FALSE	TRUE	Transcript	3PRIME_UTR	2	3_prime_UTR	0.50	0.04
11_75283701_T_A	11	75283701	.	T	A	G	NA	PASS			c.*573T>A	3' UTR		1	30954	0	0.03231	0	8726	0	0	302	0	0	1620	0	0	3492	0	1	14994	0	0	838	0	0	982	0	0	0	0	TRUE	TRUE	Transcript	3PRIME_UTR	2	3_prime_UTR	0.48	0.03
11_75283708_T_G	11	75283708	rs145619367	T	G	G	NA	PASS			c.*580T>G	3' UTR		127	30958	1	0.004102	126	8724	1	0	302	0	0	1618	0	0	3494	0	0	15000	0	1	838	0	0	982	0	0	0	0	TRUE	TRUE	Transcript	3PRIME_UTR	2	3_prime_UTR	0.47	0.03
11_75283717_C_CT	11	75283717	.	C	CT	G	NA	PASS			c.*595dupT	3' UTR		1	30944	0	0.03232	0	8720	0	0	302	0	0	1618	0	0	3492	0	1	14992	0	0	838	0	0	982	0	0	0	0	NA	TRUE	Transcript	3PRIME_UTR	2	3_prime_UTR,feature_elongation	0.44	0.03
11_75283739_G_A	11	75283739	rs764769645	G	A	G	NA	PASS			c.*611G>A	3' UTR		2	30952	0	0.06462	0	8728	0	0	300	0	0	1622	0	0	3492	0	0	14990	0	0	838	0	2	982	0	0	0	0	FALSE	TRUE	Transcript	3PRIME_UTR	2	3_prime_UTR	0.36	0.03
11_75283752_G_A	11	75283752	.	G	A	G	NA	PASS			c.*624G>A	3' UTR		3	30944	0	0.09695	0	8726	0	0	302	0	0	1622	0	0	3490	0	3	14984	0	0	838	0	0	982	0	0	0	0	FALSE	TRUE	Transcript	3PRIME_UTR	2	3_prime_UTR	0.36	0.01
11_75283760_G_A	11	75283760	rs78709417	G	A	G	NA	PASS			c.*632G>A	3' UTR		1	30942	0	0.03232	0	8726	0	0	302	0	0	1620	0	0	3492	0	0	14982	0	0	838	0	1	982	0	0	0	0	FALSE	TRUE	Transcript	3PRIME_UTR	2	3_prime_UTR	0.32	0.00
11_75283760_G_C	11	75283760	rs78709417	G	C	G	NA	PASS			c.*632G>C	3' UTR		2	30942	0	0.06464	0	8726	0	0	302	0	2	1620	0	0	3492	0	0	14982	0	0	838	0	0	982	0	0	0	0	TRUE	TRUE	Transcript	3PRIME_UTR	2	3_prime_UTR	0.32	0.00
11_75283796_A_AT	11	75283796	rs185499724	A	AT	G	NA	PASS			c.*678dupT	3' UTR		344	30048	4	0.01145	265	8570	3	19	292	1	0	1610	0	0	3202	0	52	14628	0	3	806	0	5	940	0	0	0	0	NA	TRUE	Transcript	3PRIME_UTR	2	3_prime_UTR,feature_elongation	0.36	0.01
11_75283796_A_G	11	75283796	rs185499724	A	G	G	NA	PASS			c.*668A>G	3' UTR		7	30048	0	0.0002330	3	8570	0	0	292	0	1	1610	0	0	3202	0	3	14628	0	0	806	0	0	940	0	0	0	0	FALSE	TRUE	Transcript	3PRIME_UTR	2	3_prime_UTR	0.36	0.01
11_75283796_A_T	11	75283796	rs185499724	A	T	G	NA	PASS			c.*668A>T	3' UTR		136	30048	1	0.004526	131	8570	1	0	292	0	0	1610	0	0	3202	0	3	14628	0	1	806	0	1	940	0	0	0	0	TRUE	TRUE	Transcript	3PRIME_UTR	2	3_prime_UTR	0.36	0.01
11_75283796_AT_A	11	75283796	rs185499724	AT	A	G	NA	PASS			c.*678delT	3' UTR		9981	30048	1599	0.3322	2709	8570	414	87	292	9	285	1610	25	1283	3202	230	4985	14628	814	288	806	42	344	940	65	0	0	0	NA	TRUE	Transcript	3PRIME_UTR	2	3_prime_UTR,feature_truncation	0.36	0.01
11_75283814_A_T	11	75283814	.	A	T	G	NA	PASS			c.*686A>T	3' UTR		2	30760	0	0.06502	0	8684	0	0	302	0	0	1620	0	0	3460	0	2	14882	0	0	838	0	0	974	0	0	0	0	TRUE	TRUE	Transcript	3PRIME_UTR	2	3_prime_UTR	0.40	0.01
11_75283826_A_T	11	75283826	.	A	T	G	NA	PASS			c.*698A>T	3' UTR		1	30906	0	0.03236	1	8718	0	0	302	0	0	1618	0	0	3484	0	0	14972	0	0	838	0	0	974	0	0	0	0	TRUE	TRUE	Transcript	3PRIME_UTR	2	3_prime_UTR	0.38	0.01
11_75283841_G_A	11	75283841	.	G	A	G	NA	PASS				downstream gene		2	30948	0	0.06462	1	8728	0	0	302	0	0	1618	0	0	3486	0	1	14994	0	0	838	0	0	982	0	0	0	0	FALSE	TRUE	Intergenic	DOWNSTREAM	1	downstream	0.39	0.03
11_75283878_C_T	11	75283878	.	C	T	G	NA	PASS				downstream gene		2	30942	0	0.06464	1	8726	0	0	302	0	0	1620	0	0	3492	0	1	14982	0	0	838	0	0	982	0	0	0	0	FALSE	TRUE	Intergenic	DOWNSTREAM	1	downstream	0.46	0.03
[truncated: 101 more columns]

## Sheet: ForCADD
Chrom_Position_Reference_Alternate	Chrom	Position	RSID	Reference	Alternate
11_75273043_A_G	11	75273043	rs760997021	A	G
11_75273056_C_T	11	75273056	rs555619747	C	T
11_75273066_C_T	11	75273066	.	C	T
11_75273067_C_G	11	75273067	.	C	G
11_75273075_C_T	11	75273075	.	C	T
11_75273076_C_A	11	75273076	.	C	A
11_75273088_C_A	11	75273088	.	C	A
11_75273103_T_C	11	75273103	.	T	C
11_75273114_G_A	11	75273114	.	G	A
11_75273117_C_T	11	75273117	.	C	T
11_75273130_CA_C	11	75273130	rs533719133	CA	C
11_75273137_A_AGGGGCCG	11	75273137	.	A	AGGGGCCG
11_75273141_G_A	11	75273141	.	G	A
11_75273154_G_A	11	75273154	rs541047398	G	A
11_75273188_G_A	11	75273188	rs564033612	G	A
11_75273188_G_T	11	75273188	rs564033612	G	T
11_75273208_A_G	11	75273208	rs865919284	A	G
11_75273210_G_A	11	75273210	rs185295615	G	A
11_75273214_T_C	11	75273214	.	T	C
11_75273249_A_C	11	75273249	.	A	C
11_75273249_AG_A	11	75273249	.	AG	A
11_75273251_G_T	11	75273251	.	G	T
11_75273252_G_T	11	75273252	.	G	T
11_75273254_G_A	11	75273254	.	G	A
11_75273254_G_T	11	75273254	.	G	T
11_75273297_TAAGAG_T	11	75273297	.	TAAGAG	T
11_75273300_G_A	11	75273300	.	G	A
11_75273301_A_T	11	75273301	.	A	T
11_75273314_C_A	11	75273314	.	C	A
11_75273314_C_T	11	75273314	.	C	T
11_75273317_G_A	11	75273317	.	G	A
11_75273321_C_G	11	75273321	.	C	G
11_75273326_G_A	11	75273326	rs78251872	G	A
11_75273337_G_C	11	75273337	.	G	C
11_75273339_C_T	11	75273339	.	C	T
11_75273358_G_A	11	75273358	.	G	A
11_75273374_G_A	11	75273374	.	G	A
11_75273375_G_A	11	75273375	.	G	A
11_75273381_G_C	11	75273381	.	G	C
11_75273384_T_C	11	75273384	.	T	C
11_75273396_G_A	11	75273396	rs552213304	G	A
11_75273405_A_AGCGCCGAGCAATCTGGGGGT	11	75273405	.	A	AGCGCCGAGCAATCTGGGGGT
11_75273414_C_A	11	75273414	.	C	A
11_75273466_T_C	11	75273466	.	T	C
11_75273476_A_T	11	75273476	.	A	T
11_75273490_A_T	11	75273490	.	A	T
11_75273510_TG_T	11	75273510	rs199898881	TG	T
11_75273516_C_T	11	75273516	rs566342735	C	T
11_75273525_GGTTTGGAATCGAGA_G	11	75273525	.	GGTTTGGAATCGAGA	G
11_75273529_T_G	11	75273529	.	T	G
11_75273540_G_T	11	75273540	.	G	T
11_75273572_G_A	11	75273572	.	G	A
11_75273583_G_A	11	75273583	rs374185865	G	A
11_75273595_G_C	11	75273595	rs190109537	G	C
11_75273606_C_A	11	75273606	.	C	A
11_75273626_G_A	11	75273626	.	G	A
11_75273636_A_C	11	75273636	.	A	C
11_75273639_G_C	11	75273639	.	G	C
11_75273668_G_A	11	75273668	.	G	A
11_75273698_G_GGCAGAGA	11	75273698	.	G	GGCAGAGA
11_75273714_T_TCTGCGGAAAGAAACA	11	75273714	.	T	TCTGCGGAAAGAAACA
11_75273728_C_G	11	75273728	rs180875574	C	G
11_75273730_G_A	11	75273730	rs569784797	G	A
11_75273735_G_A	11	75273735	.	G	A
11_75273754_G_A	11	75273754	rs535616229	G	A
11_75273761_C_G	11	75273761	rs570435126	C	G
11_75273766_A_G	11	75273766	.	A	G
11_75273768_G_A	11	75273768	.	G	A
11_75273777_G_A	11	75273777	.	G	A
11_75273784_C_T	11	75273784	rs369733471	C	T
11_75273791_C_T	11	75273791	rs555239987	C	T
11_75273798_C_T	11	75273798	rs374147271	C	T
11_75273818_G_T	11	75273818	.	G	T
11_75273831_G_A	11	75273831	rs867290877	G	A
11_75273840_T_G	11	75273840	.	T	G
11_75273849_G_A	11	75273849	.	G	A
11_75273850_C_T	11	75273850	.	C	T
11_75273861_C_T	11	75273861	rs557791925	C	T
11_75273877_G_A	11	75273877	.	G	A
11_75273903_G_A	11	75273903	rs543196585	G	A
11_75273910_A_G	11	75273910	.	A	G
11_75273943_G_A	11	75273943	.	G	A
11_75273983_C_T	11	75273983	.	C	T
11_75273991_C_T	11	75273991	.	C	T
11_75274027_G_A	11	75274027	rs376324002	G	A
11_75274045_G_GA	11	75274045	.	G	GA
11_75274051_A_AG	11	75274051	rs796543761	A	AG
11_75274061_G_A	11	75274061	rs11236457	G	A
11_75274064_C_A	11	75274064	.	C	A
11_75274089_A_G	11	75274089	.	A	G
11_75274141_G_A	11	75274141	.	G	A
11_75274150_G_T	11	75274150	rs590121	G	T
11_75274163_G_T	11	75274163	rs560221554	G	T
11_75274191_G_A	11	75274191	.	G	A
11_75274205_G_A	11	75274205	.	G	A
11_75274210_C_G	11	75274210	.	C	G
11_75274215_T_G	11	75274215	rs80147742	T	G
11_75274218_G_C	11	75274218	.	G	C
11_75274224_T_G	11	75274224	.	T	G
11_75274246_G_A	11	75274246	.	G	A
11_75274250_G_A	11	75274250	.	G	A
11_75274289_C_T	11	75274289	.	C	T
11_75274311_G_A	11	75274311	.	G	A
11_75274319_C_T	11	75274319	.	C	T
11_75274322_T_A	11	75274322	.	T	A
11_75274327_T_A	11	75274327	.	T	A
11_75274334_C_T	11	75274334	.	C	T
11_75274336_C_G	11	75274336	rs192234220	C	G
11_75274356_A_G	11	75274356	.	A	G
11_75274358_G_A	11	75274358	rs113206982	G	A
11_75274385_G_A	11	75274385	rs534964992	G	A
11_75274396_C_T	11	75274396	rs527599700	C	T
11_75274415_G_C	11	75274415	.	G	C
11_75274428_A_G	11	75274428	.	A	G
11_75274428_AT_A	11	75274428	.	AT	A
11_75274430_C_T	11	75274430	.	C	T
11_75274434_C_A	11	75274434	.	C	A
11_75274434_C_G	11	75274434	.	C	G
11_75274455_C_A	11	75274455	.	C	A
11_75274485_T_G	11	75274485	.	T	G
11_75274519_G_C	11	75274519	.	G	C
11_75274522_T_C	11	75274522	.	T	C
11_75274527_C_T	11	75274527	.	C	T
11_75274535_A_AG	11	75274535	.	A	AG
11_75274610_G_A	11	75274610	.	G	A
11_75274617_C_T	11	75274617	.	C	T
11_75274623_C_T	11	75274623	.	C	T
11_75274630_T_C	11	75274630	rs681390	T	C
11_75274630_T_G	11	75274630	rs681390	T	G
11_75274659_G_A	11	75274659	rs111567312	G	A
11_75274673_C_G	11	75274673	.	C	G
11_75274673_C_T	11	75274673	.	C	T
11_75274687_C_A	11	75274687	rs589374	C	A
11_75274689_G_C	11	75274689	.	G	C
11_75274691_T_G	11	75274691	.	T	G
11_75274696_C_T	11	75274696	rs187992902	C	T
11_75274703_C_T	11	75274703	rs545326903	C	T
11_75274725_T_C	11	75274725	rs78860282	T	C
11_75274732_T_A	11	75274732	rs537676611	T	A
11_75274743_G_T	11	75274743	.	G	T
11_75274753_C_G	11	75274753	.	C	G
11_75274755_C_T	11	75274755	rs138800808	C	T
11_75274771_G_T	11	75274771	.	G	T
11_75274807_A_G	11	75274807	.	A	G
11_75274820_T_C	11	75274820	.	T	C
11_75274856_GT_G	11	75274856	.	GT	G
11_75274859_C_G	11	75274859	.	C	G
11_75274871_C_T	11	75274871	.	C	T
11_75274872_C_G	11	75274872	.	C	G
11_75274888_C_G	11	75274888	rs546777647	C	G
11_75277295_T_C	11	75277295	rs189348278	T	C
11_75277300_G_A	11	75277300	.	G	A
11_75277306_G_A	11	75277306	rs375603549	G	A
11_75277310_G_A	11	75277310	.	G	A
11_75277332_A_G	11	75277332	.	A	G
11_75277342_G_A	11	75277342	.	G	A
11_75277351_A_G	11	75277351	rs547981367	A	G
11_75277357_A_C	11	75277357	.	A	C
11_75277372_T_C	11	75277372	rs139447737	T	C
11_75277375_A_T	11	75277375	rs771699372	A	T
11_75277376_C_G	11	75277376	rs78910605	C	G
11_75277376_C_T	11	75277376	rs78910605	C	T
11_75277377_G_A	11	75277377	.	G	A
11_75277381_A_T	11	75277381	rs369900182	A	T
11_75277386_T_C	11	75277386	rs765666013	T	C
11_75277391_G_A	11	75277391	.	G	A
11_75277392_GC_G	11	75277392	.	GC	G
11_75277394_C_G	11	75277394	.	C	G
11_75277396_TGC_T	11	75277396	.	TGC	T
11_75277412_T_C	11	75277412	.	T	C
11_75277413_C_T	11	75277413	rs764762999	C	T
11_75277422_T_G	11	75277422	rs751588882	T	G
11_75277423_T_C	11	75277423	rs757293522	T	C
11_75277432_T_A	11	75277432	rs767726256	T	A
11_75277434_G_A	11	75277434	rs750583954	G	A
11_75277434_G_C	11	75277434	rs750583954	G	C
11_75277439_G_C	11	75277439	rs756380782	G	C
11_75277445_G_A	11	75277445	.	G	A
11_75277448_C_T	11	75277448	rs369807954	C	T
11_75277449_G_A	11	75277449	rs778730843	G	A
11_75277451_C_A	11	75277451	rs771513145	C	A
11_75277451_C_G	11	75277451	rs771513145	C	G
11_75277451_C_T	11	75277451	rs771513145	C	T
11_75277452_G_A	11	75277452	rs200397594	G	A
11_75277454_G_A	11	75277454	.	G	A
11_75277456_T_TGAAGAAACCTGCAGCC	11	75277456	rs776044395	T	TGAAGAAACCTGCAGCC
11_75277457_G_A	11	75277457	rs570027359	G	A
11_75277465_C_G	11	75277465	.	C	G
11_75277467_G_A	11	75277467	rs775990446	G	A
11_75277468_C_T	11	75277468	.	C	T
11_75277472_C_T	11	75277472	rs763412073	C	T
11_75277480_C_G	11	75277480	rs774738608	C	G
11_75277480_C_T	11	75277480	rs774738608	C	T
11_75277481_T_A	11	75277481	rs767477512	T	A
11_75277486_G_C	11	75277486	rs140588417	G	C
11_75277489_C_G	11	75277489	.	C	G
11_75277491_G_C	11	75277491	rs150061926	G	C
11_75277491_G_T	11	75277491	rs150061926	G	T
11_75277492_C_T	11	75277492	rs754791521	C	T
11_75277493_G_A	11	75277493	rs767591495	G	A
11_75277494_GAGA_G	11	75277494	rs761108630	GAGA	G
11_75277496_G_A	11	75277496	rs555812743	G	A
11_75277498_A_T	11	75277498	rs752546581	A	T
11_75277502_G_A	11	75277502	rs758409911	G	A
11_75277511_G_A	11	75277511	rs746583288	G	A
11_75277513_C_T	11	75277513	.	C	T
11_75277517_C_A	11	75277517	rs770639155	C	A
11_75277519_C_A	11	75277519	rs781002791	C	A
11_75277521_C_T	11	75277521	rs768929258	C	T
11_75277526_C_T	11	75277526	rs145039745	C	T
11_75277533_A_G	11	75277533	.	A	G
11_75277538_C_CTTCA	11	75277538	rs769257642	C	CTTCA
11_75277539_G_GCTT	11	75277539	rs772717163	G	GCTT
11_75277540_G_GTA	11	75277540	rs762536861	G	GTA
11_75277540_G_T	11	75277540	rs762536861	G	T
11_75277543_T_A	11	75277543	rs772706450	T	A
11_75277552_G_A	11	75277552	rs773211240	G	A
11_75277554_T_C	11	75277554	rs540061657	T	C
11_75277556_G_T	11	75277556	.	G	T
11_75277561_A_G	11	75277561	rs553519612	A	G
11_75277562_G_A	11	75277562	rs754091752	G	A
11_75277565_C_T	11	75277565	rs759842764	C	T
11_75277567_T_C	11	75277567	rs764918894	T	C
11_75277572_A_G	11	75277572	rs752594307	A	G
11_75277581_G_A	11	75277581	rs758261919	G	A
11_75277582_C_T	11	75277582	rs576480194	C	T
11_75277583_A_C	11	75277583	rs751053910	A	C
11_75277585_T_C	11	75277585	.	T	C
11_75277585_TGGA_T	11	75277585	.	TGGA	T
11_75277586_G_A	11	75277586	rs756847184	G	A
11_75277593_A_G	11	75277593	rs780947787	A	G
11_75277599_G_C	11	75277599	rs755858302	G	C
11_75277602_T_C	11	75277602	.	T	C
11_75277605_C_G	11	75277605	rs779144412	C	G
11_75277607_C_T	11	75277607	rs748554062	C	T
11_75277613_G_A	11	75277613	rs546032466	G	A
11_75277616_G_C	11	75277616	rs747053791	G	C
11_75277621_C_G	11	75277621	rs376824871	C	G
11_75277621_C_T	11	75277621	rs376824871	C	T
11_75277628_A_G	11	75277628	rs584961	A	G
11_75277631_G_A	11	75277631	rs146831880	G	A
11_75277631_G_C	11	75277631	rs146831880	G	C
11_75277634_C_T	11	75277634	rs367576479	C	T
11_75277635_G_C	11	75277635	.	G	C
11_75277638_T_G	11	75277638	rs751575798	T	G
11_75277658_C_T	11	75277658	rs374032433	C	T
11_75277659_A_AC	11	75277659	.	A	AC
11_75277661_G_A	11	75277661	rs139127426	G	A
11_75277666_C_T	11	75277666	rs750020039	C	T
11_75277687_G_A	11	75277687	rs541595707	G	A
11_75277691_C_G	11	75277691	rs758825132	C	G
11_75277691_C_T	11	75277691	rs758825132	C	T
11_75277692_G_A	11	75277692	rs749665611	G	A
11_75277694_G_C	11	75277694	.	G	C
11_75277698_C_CTGCGCGACGAGGAGG	11	75277698	.	C	CTGCGCGACGAGGAGG
11_75277699_T_A	11	75277699	rs377583721	T	A
11_75277701_C_T	11	75277701	rs369290752	C	T
11_75277703_C_T	11	75277703	rs757737859	C	T
11_75277706_C_CGAGGAGGTG	11	75277706	rs766009390	C	CGAGGAGGTG
11_75277713_G_A	11	75277713	rs745963767	G	A
11_75277718_C_T	11	75277718	.	C	T
11_75277720_C_G	11	75277720	rs148959638	C	G
11_75277730_C_A	11	75277730	rs775801195	C	A
11_75277730_C_T	11	75277730	rs775801195	C	T
11_75277731_GAGC_G	11	75277731	.	GAGC	G
11_75277733_G_C	11	75277733	rs763945752	G	C
11_75277736_G_A	11	75277736	rs774334034	G	A
11_75277737_C_T	11	75277737	rs761840921	C	T
11_75277738_T_A	11	75277738	.	T	A
11_75277740_C_A	11	75277740	rs200265134	C	A
11_75277740_C_T	11	75277740	rs200265134	C	T
11_75277741_GC_G	11	75277741	rs755675475	GC	G
11_75277742_C_G	11	75277742	.	C	G
11_75277744_C_G	11	75277744	rs571009837	C	G
11_75277744_C_T	11	75277744	rs571009837	C	T
11_75277747_T_C	11	75277747	rs751248991	T	C
11_75277747_T_TCAG	11	75277747	rs751248991	T	TCAG
11_75277748_C_T	11	75277748	.	C	T
11_75277749_A_AC	11	75277749	rs751987057	A	AC
11_75277751_C_CACGTG	11	75277751	.	C	CACGTG
11_75277752_AACTCC_A	11	75277752	.	AACTCC	A
11_75277753_A_G	11	75277753	rs757694413	A	G
11_75277755_T_G	11	75277755	rs781727997	T	G
11_75277757_C_G	11	75277757	rs650241	C	G
11_75277760_G_C	11	75277760	rs780034600	G	C
11_75277761_G_T	11	75277761	rs749500041	G	T
11_75277765_G_C	11	75277765	rs761716222	G	C
11_75277765_G_T	11	75277765	rs761716222	G	T
11_75277769_C_G	11	75277769	rs772088561	C	G
11_75277769_C_T	11	75277769	rs772088561	C	T
11_75277782_C_T	11	75277782	rs773234850	C	T
11_75277787_C_T	11	75277787	rs760571465	C	T
11_75277791_C_T	11	75277791	rs753347871	C	T
11_75277794_C_T	11	75277794	.	C	T
11_75277795_T_C	11	75277795	.	T	C
11_75277796_G_C	11	75277796	.	G	C
11_75277800_G_C	11	75277800	rs759183941	G	C
11_75277803_C_G	11	75277803	rs764873239	C	G
11_75277808_C_A	11	75277808	rs751862278	C	A
11_75277808_C_T	11	75277808	rs751862278	C	T
11_75277810_C_T	11	75277810	rs757639350	C	T
11_75277818_T_C	11	75277818	rs781508942	T	C
11_75277820_C_G	11	75277820	rs371660937	C	G
11_75277820_C_T	11	75277820	rs371660937	C	T
11_75277825_A_G	11	75277825	.	A	G
11_75277827_G_A	11	75277827	.	G	A
11_75277829_C_A	11	75277829	rs756623619	C	A
11_75277832_C_T	11	75277832	.	C	T
11_75277837_G_A	11	75277837	.	G	A
11_75277846_A_G	11	75277846	rs749386696	A	G
11_75277849_A_G	11	75277849	rs768946201	A	G
11_75277851_C_A	11	75277851	.	C	A
11_75277853_C_G	11	75277853	.	C	G
11_75277856_C_T	11	75277856	rs779302299	C	T
11_75277858_A_G	11	75277858	rs747915459	A	G
11_75277862_C_G	11	75277862	.	C	G
11_75277862_C_T	11	75277862	.	C	T
11_75277863_G_A	11	75277863	.	G	A
11_75277863_G_C	11	75277863	.	G	C
11_75277870_C_T	11	75277870	rs771963597	C	T
11_75277873_A_G	11	75277873	.	A	G
11_75277875_A_C	11	75277875	rs112083274	A	C
11_75277879_A_G	11	75277879	rs760648204	A	G
11_75277880_C_G	11	75277880	rs770842307	C	G
11_75277886_C_T	11	75277886	rs150586616	C	T
11_75277893_C_A	11	75277893	rs764819709	C	A
11_75277900_C_T	11	75277900	rs750807661	C	T
11_75277901_G_A	11	75277901	rs756637017	G	A
11_75277916_C_A	11	75277916	.	C	A
11_75277916_C_T	11	75277916	.	C	T
11_75277917_G_A	11	75277917	rs766813083	G	A
11_75277917_G_T	11	75277917	rs766813083	G	T
11_75277919_G_A	11	75277919	.	G	A
11_75277925_C_T	11	75277925	rs200467391	C	T
11_75277926_G_A	11	75277926	rs753922805	G	A
11_75277927_C_T	11	75277927	rs755143041	C	T
11_75277937_C_T	11	75277937	.	C	T
11_75277941_G_A	11	75277941	rs758606932	G	A
11_75277941_G_C	11	75277941	rs758606932	G	C
11_75277949_G_C	11	75277949	.	G	C
11_75277952_C_G	11	75277952	rs535816918	C	G
11_75277959_A_G	11	75277959	rs138784081	A	G
11_75277964_G_A	11	75277964	.	G	A
11_75277965_G_A	11	75277965	.	G	A
11_75277967_C_A	11	75277967	rs745340617	C	A
11_75277969_T_C	11	75277969	rs769259507	T	C
11_75277969_T_G	11	75277969	rs769259507	T	G
11_75277973_G_A	11	75277973	rs559687602	G	A
11_75277973_G_C	11	75277973	rs559687602	G	C
11_75277974_C_A	11	75277974	rs141721173	C	A
11_75277983_G_C	11	75277983	rs766872022	G	C
11_75277989_C_T	11	75277989	rs377081876	C	T
11_75277991_G_C	11	75277991	.	G	C
11_75277992_C_T	11	75277992	rs651581	C	T
11_75277994_A_C	11	75277994	rs764723506	A	C
11_75277997_C_T	11	75277997	.	C	T
11_75278000_C_G	11	75278000	.	C	G
11_75278007_T_G	11	75278007	rs777869458	T	G
11_75278020_A_AGTCG	11	75278020	.	A	AGTCG
11_75278023_C_T	11	75278023	rs757033716	C	T
11_75278024_G_T	11	75278024	rs781004270	G	T
11_75278025_G_A	11	75278025	rs769777035	G	A
11_75278028_G_A	11	75278028	rs576964959	G	A
11_75278034_T_G	11	75278034	rs748749367	T	G
11_75278040_G_GTCC	11	75278040	rs35462148	G	GTCC
11_75278040_G_GTCCTCC	11	75278040	rs35462148	G	GTCCTCC
11_75278046_C_CTCT	11	75278046	rs777940027	C	CTCT
11_75278048_C_T	11	75278048	.	C	T
11_75278050_T_TCCC	11	75278050	rs753951992	T	TCCC
11_75278051_C_A	11	75278051	rs868675056	C	A
11_75278054_C_T	11	75278054	.	C	T
11_75278055_C_CT	11	75278055	.	C	CT
11_75278056_C_CCG	11	75278056	rs773909381	C	CCG
11_75278056_C_CCT	11	75278056	rs773909381	C	CCT
11_75278056_C_G	11	75278056	rs773909381	C	G
11_75278056_C_T	11	75278056	rs773909381	C	T
11_75278059_G_C	11	75278059	rs761570131	G	C
11_75278071_G_A	11	75278071	.	G	A
11_75278078_G_T	11	75278078	.	G	T
11_75278806_G_A	11	75278806	.	G	A
11_75278811_G_C	11	75278811	rs145556156	G	C
11_75278856_C_A	11	75278856	rs12223805	C	A
11_75278881_C_A	11	75278881	.	C	A
11_75278921_C_T	11	75278921	.	C	T
11_75278945_G_A	11	75278945	.	G	A
11_75278955_A_G	11	75278955	.	A	G
11_75278959_G_T	11	75278959	.	G	T
11_75278980_G_A	11	75278980	.	G	A
11_75278993_T_A	11	75278993	.	T	A
11_75278996_C_T	11	75278996	.	C	T
11_75279029_A_G	11	75279029	.	A	G
11_75279059_G_T	11	75279059	.	G	T
11_75279079_T_C	11	75279079	rs605040	T	C
11_75279128_G_A	11	75279128	rs780697914	G	A
11_75279142_G_A	11	75279142	.	G	A
11_75279162_C_T	11	75279162	rs535324818	C	T
11_75279169_C_T	11	75279169	.	C	T
11_75279183_A_C	11	75279183	rs747756937	A	C
11_75279194_C_G	11	75279194	.	C	G
11_75279195_G_A	11	75279195	.	G	A
11_75279203_G_A	11	75279203	.	G	A
11_75279214_G_A	11	75279214	.	G	A
11_75279232_G_C	11	75279232	rs140465492	G	C
11_75279249_G_A	11	75279249	rs569745383	G	A
11_75279256_C_G	11	75279256	.	C	G
11_75279258_T_G	11	75279258	.	T	G
11_75279285_G_C	11	75279285	.	G	C
11_75279289_G_A	11	75279289	.	G	A
11_75279290_T_C	11	75279290	rs645935	T	C
11_75279383_C_G	11	75279383	.	C	G
11_75279400_C_T	11	75279400	rs572098676	C	T
11_75279403_TC_T	11	75279403	.	TC	T
11_75279404_C_T	11	75279404	rs75530338	C	T
11_75279412_T_A	11	75279412	.	T	A
11_75279412_T_C	11	75279412	.	T	C
11_75279418_G_A	11	75279418	.	G	A
11_75279421_G_T	11	75279421	.	G	T
11_75279446_G_T	11	75279446	.	G	T
11_75279447_T_C	11	75279447	rs646474	T	C
11_75279455_AT_A	11	75279455	.	AT	A
11_75279458_T_C	11	75279458	.	T	C
11_75279471_A_G	11	75279471	.	A	G
11_75279476_C_T	11	75279476	rs646851	C	T
11_75279485_C_A	11	75279485	.	C	A
11_75279500_A_G	11	75279500	.	A	G
11_75279510_G_A	11	75279510	rs563954714	G	A
11_75279539_C_T	11	75279539	rs646920	C	T
11_75279543_C_T	11	75279543	.	C	T
11_75279544_A_C	11	75279544	.	A	C
11_75279549_C_T	11	75279549	rs189069347	C	T
11_75279578_G_A	11	75279578	.	G	A
11_75279606_C_G	11	75279606	.	C	G
11_75279619_C_T	11	75279619	.	C	T
11_75279622_T_G	11	75279622	rs531078667	T	G
11_75279630_G_A	11	75279630	.	G	A
11_75279634_G_GCTCTATAGCTGGGCC	11	75279634	.	G	GCTCTATAGCTGGGCC
11_75279654_A_G	11	75279654	.	A	G
11_75279670_C_A	11	75279670	.	C	A
11_75279700_C_T	11	75279700	.	C	T
11_75279703_G_T	11	75279703	.	G	T
11_75279709_C_T	11	75279709	.	C	T
11_75279733_G_T	11	75279733	.	G	T
11_75279734_G_A	11	75279734	rs777193859	G	A
11_75279734_G_T	11	75279734	rs777193859	G	T
11_75279735_C_T	11	75279735	rs769770929	C	T
11_75279736_G_A	11	75279736	rs765845876	G	A
11_75279736_G_C	11	75279736	rs765845876	G	C
11_75279738_C_T	11	75279738	rs376768493	C	T
11_75279740_A_G	11	75279740	.	A	G
11_75279751_A_C	11	75279751	.	A	C
11_75279756_G_A	11	75279756	rs764336626	G	A
11_75279756_G_C	11	75279756	rs764336626	G	C
11_75279763_G_A	11	75279763	.	G	A
11_75279764_C_A	11	75279764	.	C	A
11_75279766_C_T	11	75279766	rs751699952	C	T
11_75279768_A_C	11	75279768	rs550785236	A	C
11_75279769_A_G	11	75279769	.	A	G
11_75279770_C_G	11	75279770	rs757544884	C	G
11_75279772_A_G	11	75279772	.	A	G
11_75279773_C_T	11	75279773	rs780947291	C	T
11_75279775_G_A	11	75279775	rs750282634	G	A
11_75279778_C_T	11	75279778	rs755976024	C	T
11_75279780_C_G	11	75279780	rs569867446	C	G
11_75279795_C_T	11	75279795	.	C	T
11_75279804_G_T	11	75279804	.	G	T
11_75279805_A_G	11	75279805	.	A	G
11_75279808_G_A	11	75279808	.	G	A
11_75279810_G_A	11	75279810	rs748795204	G	A
11_75279813_C_T	11	75279813	rs768024089	C	T
11_75279814_A_G	11	75279814	rs778537327	A	G
11_75279814_A_T	11	75279814	rs778537327	A	T
11_75279817_C_A	11	75279817	rs747743316	C	A
11_75279817_C_T	11	75279817	rs747743316	C	T
11_75279818_G_A	11	75279818	rs771916875	G	A
11_75279826_A_G	11	75279826	.	A	G
11_75279829_G_A	11	75279829	.	G	A
11_75279831_G_A	11	75279831	rs369251719	G	A
11_75279836_G_A	11	75279836	rs759994312	G	A
11_75279842_A_G	11	75279842	.	A	G
11_75279843_T_C	11	75279843	.	T	C
11_75279846_C_T	11	75279846	rs649257	C	T
11_75279847_G_A	11	75279847	rs534696801	G	A
11_75279848_T_G	11	75279848	rs763555596	T	G
11_75279858_G_C	11	75279858	rs764058290	G	C
11_75279858_G_T	11	75279858	rs764058290	G	T
11_75279864_G_A	11	75279864	.	G	A
11_75279867_C_A	11	75279867	rs761932276	C	A
11_75279868_C_T	11	75279868	rs767729275	C	T
11_75279869_G_A	11	75279869	rs750157727	G	A
11_75279883_T_C	11	75279883	rs138193444	T	C
11_75279892_C_A	11	75279892	.	C	A
11_75279892_C_G	11	75279892	.	C	G
11_75279893_A_C	11	75279893	.	A	C
11_75279894_G_C	11	75279894	.	G	C
11_75279896_G_T	11	75279896	rs779867183	G	T
11_75279906_G_C	11	75279906	.	G	C
11_75279908_G_A	11	75279908	rs201156258	G	A
11_75279909_T_C	11	75279909	rs755002360	T	C
11_75279909_T_G	11	75279909	rs755002360	T	G
11_75279912_G_A	11	75279912	.	G	A
11_75279912_G_T	11	75279912	.	G	T
11_75279913_G_T	11	75279913	rs534877216	G	T
11_75279919_A_G	11	75279919	rs747699553	A	G
11_75279919_A_T	11	75279919	rs747699553	A	T
11_75279925_G_C	11	75279925	rs771794001	G	C
11_75279934_A_C	11	75279934	rs777590062	A	C
11_75279938_A_C	11	75279938	rs746193011	A	C
11_75279941_C_A	11	75279941	.	C	A
11_75279942_C_G	11	75279942	rs770252640	C	G
11_75279943_T_C	11	75279943	rs775971073	T	C
11_75279953_G_A	11	75279953	.	G	A
11_75279955_G_C	11	75279955	rs763351865	G	C
11_75279956_C_G	11	75279956	.	C	G
11_75279960_G_A	11	75279960	.	G	A
11_75279964_C_G	11	75279964	.	C	G
11_75279965_C_T	11	75279965	.	C	T
11_75279969_C_T	11	75279969	.	C	T
11_75279970_C_T	11	75279970	.	C	T
11_75279971_G_A	11	75279971	rs116506210	G	A
11_75279972_C_T	11	75279972	rs774226247	C	T
11_75279977_C_T	11	75279977	.	C	T
11_75279979_C_T	11	75279979	.	C	T
11_75279981_C_G	11	75279981	rs761892171	C	G
11_75279981_C_T	11	75279981	rs761892171	C	T
11_75279984_G_T	11	75279984	rs767688879	G	T
11_75279985_C_A	11	75279985	.	C	A
11_75279986_C_T	11	75279986	.	C	T
11_75279993_A_C	11	75279993	rs773393677	A	C
11_75279993_A_G	11	75279993	rs773393677	A	G
11_75279994_C_T	11	75279994	.	C	T
11_75279998_TACG_T	11	75279998	rs757480118	TACG	T
11_75280000_C_T	11	75280000	rs199681690	C	T
11_75280001_G_A	11	75280001	rs753734711	G	A
11_75280003_C_T	11	75280003	rs149910134	C	T
11_75280004_G_A	11	75280004	rs765236669	G	A
11_75280004_G_C	11	75280004	rs765236669	G	C
11_75280006_C_T	11	75280006	rs61733248	C	T
11_75280007_G_A	11	75280007	.	G	A
11_75280007_G_C	11	75280007	.	G	C
11_75280008_A_G	11	75280008	rs777463655	A	G
11_75280013_G_A	11	75280013	rs553118941	G	A
11_75280020_T_C	11	75280020	.	T	C
11_75280022_C_G	11	75280022	rs757027235	C	G
11_75280026_TC_T	11	75280026	.	TC	T
11_75280027_C_T	11	75280027	rs369937589	C	T
11_75280028_G_A	11	75280028	rs749664592	G	A
11_75280033_G_C	11	75280033	.	G	C
11_75280036_G_A	11	75280036	.	G	A
11_75280037_C_A	11	75280037	.	C	A
11_75280038_C_T	11	75280038	rs768984519	C	T
11_75280040_C_G	11	75280040	rs774942194	C	G
11_75280043_G_A	11	75280043	rs748697715	G	A
11_75280052_C_T	11	75280052	.	C	T
11_75280054_C_T	11	75280054	.	C	T
11_75280059_G_C	11	75280059	rs772119590	G	C
11_75280069_C_T	11	75280069	rs773342436	C	T
11_75280078_C_T	11	75280078	.	C	T
11_75280081_T_C	11	75280081	.	T	C
11_75280085_G_A	11	75280085	rs199679249	G	A
11_75280085_G_T	11	75280085	rs199679249	G	T
11_75280087_G_A	11	75280087	.	G	A
11_75280088_G_A	11	75280088	rs776233451	G	A
11_75280089_A_C	11	75280089	rs148613550	A	C
11_75280091_C_A	11	75280091	rs765044030	C	A
11_75280092_C_A	11	75280092	.	C	A
11_75280093_T_C	11	75280093	rs373407071	T	C
11_75280096_C_T	11	75280096	rs376437954	C	T
11_75280097_G_A	11	75280097	rs758458147	G	A
11_75280097_G_C	11	75280097	rs758458147	G	C
11_75280100_C_A	11	75280100	rs200572997	C	A
11_75280100_C_T	11	75280100	rs200572997	C	T
11_75280101_G_A	11	75280101	rs370057420	G	A
11_75280102_C_T	11	75280102	rs149585133	C	T
11_75280105_T_C	11	75280105	rs544719966	T	C
11_75280117_A_G	11	75280117	rs779197294	A	G
11_75280121_A_C	11	75280121	.	A	C
11_75280121_A_G	11	75280121	.	A	G
11_75280123_A_G	11	75280123	rs748644655	A	G
11_75280124_G_A	11	75280124	rs369751579	G	A
11_75280126_G_A	11	75280126	rs561247039	G	A
11_75280127_CA_C	11	75280127	.	CA	C
11_75280138_C_G	11	75280138	rs771012011	C	G
11_75280144_G_A	11	75280144	rs759715144	G	A
11_75280145_G_C	11	75280145	.	G	C
11_75280147_G_A	11	75280147	rs769607505	G	A
11_75280153_G_A	11	75280153	rs200106884	G	A
11_75280153_G_T	11	75280153	rs200106884	G	T
11_75280164_C_G	11	75280164	rs764127543	C	G
11_75280169_G_A	11	75280169	rs751052033	G	A
11_75280175_T_C	11	75280175	rs549207386	T	C
11_75280177_C_T	11	75280177	rs147740415	C	T
11_75280185_A_G	11	75280185	rs142663000	A	G
11_75280188_G_A	11	75280188	rs753068848	G	A
11_75280195_G_A	11	75280195	rs778276572	G	A
11_75280196_G_A	11	75280196	.	G	A
11_75280198_G_A	11	75280198	.	G	A
11_75280203_C_T	11	75280203	rs747053861	C	T
11_75280228_C_CCCAG	11	75280228	rs779247058	C	CCCAG
11_75280237_G_C	11	75280237	.	G	C
11_75280239_G_A	11	75280239	rs746088810	G	A
11_75280244_G_A	11	75280244	rs769977294	G	A
11_75280245_C_T	11	75280245	rs367704364	C	T
11_75280246_A_T	11	75280246	rs762851059	A	T
11_75280255_A_G	11	75280255	.	A	G
11_75280260_G_T	11	75280260	rs768662280	G	T
11_75280261_G_C	11	75280261	rs528442568	G	C
11_75280261_G_T	11	75280261	rs528442568	G	T
11_75280268_T_A	11	75280268	.	T	A
11_75280270_C_T	11	75280270	.	C	T
11_75280272_T_G	11	75280272	rs143305212	T	G
11_75280279_C_A	11	75280279	.	C	A
11_75280283_C_T	11	75280283	.	C	T
11_75280305_C_T	11	75280305	.	C	T
11_75280334_CTGGGCTCTGTGA_C	11	75280334	.	CTGGGCTCTGTGA	C
11_75280338_G_C	11	75280338	.	G	C
11_75280348_G_A	11	75280348	.	G	A
11_75280353_A_G	11	75280353	rs556891115	A	G
11_75280356_C_T	11	75280356	.	C	T
11_75280393_G_T	11	75280393	.	G	T
11_75280395_T_C	11	75280395	.	T	C
11_75280420_C_T	11	75280420	.	C	T
11_75280426_A_G	11	75280426	.	A	G
11_75280445_T_C	11	75280445	.	T	C
11_75280464_GTAT_G	11	75280464	rs531489141	GTAT	G
11_75280466_A_T	11	75280466	rs762481479	A	T
11_75280475_A_AT	11	75280475	rs553194934	A	AT
11_75280475_A_T	11	75280475	rs553194934	A	T
11_75280477_T_TA	11	75280477	rs372167947	T	TA
11_75280478_T_A	11	75280478	rs606984	T	A
11_75280478_T_TTA	11	75280478	rs606984	T	TTA
11_75280481_T_A	11	75280481	rs186303252	T	A
11_75280493_A_G	11	75280493	.	A	G
11_75280495_TCTCA_T	11	75280495	.	TCTCA	T
11_75280509_C_G	11	75280509	.	C	G
11_75280512_G_A	11	75280512	.	G	A
11_75280522_C_T	11	75280522	rs558963651	C	T
11_75280525_T_C	11	75280525	rs148350892	T	C
11_75280537_G_A	11	75280537	.	G	A
11_75280547_A_G	11	75280547	.	A	G
11_75282755_G_T	11	75282755	.	G	T
11_75282772_G_A	11	75282772	rs867140200	G	A
11_75282775_G_A	11	75282775	rs528040772	G	A
11_75282778_G_C	11	75282778	.	G	C
11_75282779_A_G	11	75282779	rs371267874	A	G
11_75282793_G_A	11	75282793	rs372559471	G	A
11_75282794_G_A	11	75282794	.	G	A
11_75282807_C_T	11	75282807	rs201369908	C	T
11_75282808_ACCT_A	11	75282808	rs746127263	ACCT	A
11_75282809_C_T	11	75282809	.	C	T
11_75282810_C_T	11	75282810	.	C	T
11_75282813_C_T	11	75282813	.	C	T
11_75282815_T_G	11	75282815	rs778152076	T	G
11_75282815_TG_T	11	75282815	rs778152076	TG	T
11_75282816_G_A	11	75282816	.	G	A
11_75282816_G_T	11	75282816	.	G	T
11_75282819_C_T	11	75282819	rs370438059	C	T
11_75282820_C_A	11	75282820	rs7105575	C	A
11_75282821_C_T	11	75282821	.	C	T
11_75282830_AC_A	11	75282830	rs772433295	AC	A
11_75282835_G_A	11	75282835	rs781326376	G	A
11_75282837_T_C	11	75282837	.	T	C
11_75282839_G_A	11	75282839	rs144791057	G	A
11_75282840_G_T	11	75282840	rs756342488	G	T
11_75282847_C_G	11	75282847	.	C	G
11_75282850_A_G	11	75282850	rs780442561	A	G
11_75282853_G_A	11	75282853	rs749048421	G	A
11_75282855_G_A	11	75282855	rs768537447	G	A
11_75282865_A_G	11	75282865	.	A	G
11_75282867_G_C	11	75282867	rs147936395	G	C
11_75282876_C_T	11	75282876	rs551772387	C	T
11_75282877_G_A	11	75282877	rs771911618	G	A
11_75282882_G_A	11	75282882	rs585821	G	A
11_75282886_C_T	11	75282886	rs760125834	C	T
11_75282887_G_A	11	75282887	rs535510332	G	A
11_75282887_G_T	11	75282887	rs535510332	G	T
11_75282889_A_G	11	75282889	.	A	G
11_75282891_G_A	11	75282891	rs201416803	G	A
11_75282909_G_A	11	75282909	rs764427500	G	A
11_75282912_C_T	11	75282912	rs751935361	C	T
11_75282913_C_G	11	75282913	rs757716271	C	G
11_75282913_C_T	11	75282913	rs757716271	C	T
11_75282917_C_A	11	75282917	.	C	A
11_75282920_G_C	11	75282920	rs150431930	G	C
11_75282921_C_T	11	75282921	rs750465183	C	T
11_75282922_G_A	11	75282922	rs368336245	G	A
11_75282926_T_A	11	75282926	.	T	A
11_75282929_A_G	11	75282929	rs780318111	A	G
11_75282930_C_T	11	75282930	rs199548932	C	T
11_75282931_G_A	11	75282931	rs369550626	G	A
11_75282932_C_G	11	75282932	.	C	G
11_75282936_C_T	11	75282936	rs554388551	C	T
11_75282937_G_A	11	75282937	rs747912977	G	A
11_75282948_G_C	11	75282948	rs771997683	G	C
11_75282957_T_A	11	75282957	.	T	A
11_75282963_C_T	11	75282963	.	C	T
11_75282965_C_T	11	75282965	rs574281910	C	T
11_75282966_C_T	11	75282966	.	C	T
11_75282968_T_C	11	75282968	rs747009311	T	C
11_75282980_T_C	11	75282980	rs758312076	T	C
11_75282984_C_T	11	75282984	rs533870576	C	T
11_75282985_G_A	11	75282985	rs200180052	G	A
11_75282988_C_T	11	75282988	rs764873155	C	T
11_75282989_G_A	11	75282989	rs774719472	G	A
11_75282990_C_T	11	75282990	rs375913094	C	T
11_75282991_G_A	11	75282991	rs768025277	G	A
11_75282993_G_C	11	75282993	rs750860974	G	C
11_75282994_G_A	11	75282994	rs577035420	G	A
11_75282994_G_T	11	75282994	rs577035420	G	T
11_75282995_A_T	11	75282995	rs545800102	A	T
11_75282996_G_A	11	75282996	rs562306544	G	A
11_75282996_G_T	11	75282996	rs562306544	G	T
11_75283000_C_T	11	75283000	rs576211302	C	T
11_75283001_G_A	11	75283001	rs779029499	G	A
11_75283002_C_T	11	75283002	.	C	T
11_75283008_C_T	11	75283008	rs752498002	C	T
11_75283009_A_C	11	75283009	.	A	C
11_75283012_C_G	11	75283012	.	C	G
11_75283017_C_T	11	75283017	rs777673772	C	T
11_75283018_T_A	11	75283018	rs746933828	T	A
11_75283020_C_T	11	75283020	rs201843800	C	T
11_75283021_G_A	11	75283021	rs200974428	G	A
11_75283023_C_T	11	75283023	rs368586977	C	T
11_75283029_C_T	11	75283029	rs769435497	C	T
11_75283036_A_G	11	75283036	rs775032765	A	G
11_75283042_C_G	11	75283042	.	C	G
11_75283048_C_T	11	75283048	rs527863136	C	T
11_75283049_G_A	11	75283049	rs772299825	G	A
11_75283053_C_T	11	75283053	rs773695492	C	T
11_75283054_A_G	11	75283054	.	A	G
11_75283056_C_G	11	75283056	rs761198901	C	G
11_75283056_C_T	11	75283056	rs761198901	C	T
11_75283059_A_G	11	75283059	rs753920797	A	G
11_75283062_C_T	11	75283062	rs371506866	C	T
11_75283063_G_A	11	75283063	.	G	A
11_75283064_G_T	11	75283064	rs765402376	G	T
11_75283067_C_A	11	75283067	rs376520307	C	A
11_75283067_C_T	11	75283067	rs376520307	C	T
11_75283070_T_A	11	75283070	.	T	A
11_75283074_A_G	11	75283074	rs752843216	A	G
11_75283078_A_G	11	75283078	rs758706956	A	G
11_75283079_T_C	11	75283079	rs201566218	T	C
11_75283084_C_T	11	75283084	rs757124438	C	T
11_75283085_G_A	11	75283085	rs781125078	G	A
11_75283090_G_C	11	75283090	rs138241050	G	C
11_75283093_C_A	11	75283093	rs769154335	C	A
11_75283093_C_T	11	75283093	rs769154335	C	T
11_75283094_G_A	11	75283094	rs371699925	G	A
11_75283095_G_C	11	75283095	rs768360780	G	C
11_75283096_C_G	11	75283096	.	C	G
11_75283099_A_G	11	75283099	rs773655408	A	G
11_75283105_G_A	11	75283105	rs761143786	G	A
11_75283107_C_G	11	75283107	rs200334001	C	G
11_75283109_A_G	11	75283109	rs777250907	A	G
11_75283114_C_A	11	75283114	rs149137596	C	A
11_75283114_C_G	11	75283114	rs149137596	C	G
11_75283115_G_A	11	75283115	rs760141322	G	A
11_75283119_C_G	11	75283119	rs145015985	C	G
11_75283119_C_T	11	75283119	rs145015985	C	T
11_75283120_G_A	11	75283120	.	G	A
11_75283131_C_T	11	75283131	rs377537840	C	T
11_75283132_C_G	11	75283132	rs550152153	C	G
11_75283134_CAG_C	11	75283134	.	CAG	C
11_75283137_G_A	11	75283137	.	G	A
11_75283140_G_A	11	75283140	rs746898179	G	A
11_75283146_A_AGGAT	11	75283146	rs757075129	A	AGGAT
11_75283146_A_G	11	75283146	rs757075129	A	G
11_75283163_C_T	11	75283163	rs569709941	C	T
11_75283164_C_G	11	75283164	rs756132470	C	G
11_75283199_T_TG	11	75283199	rs770329618	T	TG
11_75283201_G_C	11	75283201	.	G	C
11_75283202_G_A	11	75283202	rs116470636	G	A
11_75283202_G_C	11	75283202	rs116470636	G	C
11_75283202_G_T	11	75283202	rs116470636	G	T
11_75283204_G_A	11	75283204	.	G	A
11_75283234_A_C	11	75283234	.	A	C
11_75283245_G_A	11	75283245	rs184623179	G	A
11_75283247_G_A	11	75283247	.	G	A
11_75283253_A_G	11	75283253	rs9175	A	G
11_75283258_C_A	11	75283258	.	C	A
11_75283263_G_A	11	75283263	.	G	A
11_75283263_G_C	11	75283263	.	G	C
11_75283274_C_T	11	75283274	rs568431961	C	T
11_75283280_C_T	11	75283280	.	C	T
11_75283281_G_A	11	75283281	rs146501145	G	A
11_75283292_G_C	11	75283292	.	G	C
11_75283307_A_G	11	75283307	rs557446600	A	G
11_75283322_C_T	11	75283322	.	C	T
11_75283327_T_C	11	75283327	.	T	C
11_75283342_C_T	11	75283342	.	C	T
11_75283344_C_T	11	75283344	rs111736118	C	T
11_75283345_G_A	11	75283345	rs376814949	G	A
11_75283356_A_G	11	75283356	rs189882479	A	G
11_75283390_G_C	11	75283390	.	G	C
11_75283424_A_G	11	75283424	.	A	G
11_75283459_G_A	11	75283459	rs558945241	G	A
11_75283480_G_C	11	75283480	.	G	C
11_75283482_G_T	11	75283482	rs541972599	G	T
11_75283512_A_G	11	75283512	.	A	G
11_75283523_C_A	11	75283523	.	C	A
11_75283537_C_G	11	75283537	.	C	G
11_75283543_C_T	11	75283543	rs561786704	C	T
11_75283563_G_C	11	75283563	.	G	C
11_75283574_C_T	11	75283574	rs868701658	C	T
11_75283588_AC_A	11	75283588	.	AC	A
11_75283607_C_T	11	75283607	.	C	T
11_75283618_G_A	11	75283618	rs12978	G	A
11_75283623_G_T	11	75283623	rs141134744	G	T
11_75283651_G_A	11	75283651	.	G	A
11_75283653_C_A	11	75283653	rs6704	C	A
11_75283657_C_T	11	75283657	.	C	T
11_75283659_C_G	11	75283659	rs374355309	C	G
11_75283674_C_T	11	75283674	rs764676785	C	T
11_75283684_G_A	11	75283684	rs180685772	G	A
11_75283701_T_A	11	75283701	.	T	A
11_75283708_T_G	11	75283708	rs145619367	T	G
11_75283717_C_CT	11	75283717	.	C	CT
11_75283739_G_A	11	75283739	rs764769645	G	A
11_75283752_G_A	11	75283752	.	G	A
11_75283760_G_A	11	75283760	rs78709417	G	A
11_75283760_G_C	11	75283760	rs78709417	G	C
11_75283796_A_AT	11	75283796	rs185499724	A	AT
11_75283796_A_G	11	75283796	rs185499724	A	G
11_75283796_A_T	11	75283796	rs185499724	A	T
11_75283796_AT_A	11	75283796	rs185499724	AT	A
11_75283814_A_T	11	75283814	.	A	T
11_75283826_A_T	11	75283826	.	A	T
11_75283841_G_A	11	75283841	.	G	A
11_75283878_C_T	11	75283878	.	C	T

## Sheet: Sheet1
Chrom_Position_Reference_Alternate	Chrom	Position	RSID	Reference	Alternate	Source	Filters - exomes	Filters - genomes	Consequence	Protein Consequence	Transcript Consequence	Annotation	Flags	Allele Count	Allele Number	Number of Homozygotes	Allele Frequency	Allele Count African	Allele Number African	Homozygote Count African	Allele Count Ashkenazi Jewish	Allele Number Ashkenazi Jewish	Homozygote Count Ashkenazi Jewish	Allele Count East Asian	Allele Number East Asian	Homozygote Count East Asian	Allele Count European (Finnish)	Allele Number European (Finnish)	Homozygote Count European (Finnish)	Allele Count European (Non-Finnish)	Allele Number European (Non-Finnish)	Homozygote Count European (Non-Finnish)	Allele Count Latino	Allele Number Latino	Homozygote Count Latino	Allele Count Other	Allele Number Other	Homozygote Count Other	Allele Count South Asian	Allele Number South Asian	Homozygote Count South Asian	#Chrom_Pos_Ref_Alt	#Chrom	Pos	rsID	Ref	Anc	Alt	Type
11_75277467_G_A	11	75277467	rs775990446	G	A	E G	PASS	PASS	p.Ala25Thr	p.Ala25Thr	c.73G>A	missense		4	266240	0	0.01502	0	22438	0	0	9874	0	0	18510	0	0	24488	0	3	120262	0	1	34070	0	0	6210	0	0	30388	0	11_75277467_G_A	11	75277467	rs775990446	G	G	A	SNV
11_75277540_G_T	11	75277540	rs762536861	G	T	G	NA	PASS	p.Gly49Val	p.Gly49Val	c.146G>T	missense		1	30954	0	0.03231	0	8722	0	0	302	0	0	1622	0	0	3492	0	1	14998	0	0	838	0	0	980	0	0	0	0	11_75277540_G_T	11	75277540	rs762536861	G	G	T	SNV
11_75277422_T_G	11	75277422	rs751588882	T	G	E	PASS	NA	p.Phe10Val	p.Phe10Val	c.28T>G	missense		4	232812	0	0.01718	0	13368	0	0	9500	0	0	16798	0	0	21134	0	0	103922	0	0	32954	0	0	5228	0	4	29908	0	11_75277422_T_G	11	75277422	rs751588882	T	T	G	SNV
11_75277413_C_T	11	75277413	rs764762999	C	T	E	PASS	NA	p.Leu7Phe	p.Leu7Phe	c.19C>T	missense		2	232522	0	0.008601	0	13356	0	0	9462	0	0	16816	0	0	21108	0	1	103898	0	0	32880	0	0	5258	0	1	29744	0	11_75277413_C_T	11	75277413	rs764762999	C	C	T	SNV
11_75277638_T_G	11	75277638	rs751575798	T	G	E	PASS	NA	p.Ser82Ala	p.Ser82Ala	c.244T>G	missense		1	236520	0	0.004228	0	14550	0	0	9684	0	0	16950	0	0	19596	0	0	106640	0	1	33332	0	0	5336	0	0	30432	0	11_75277638_T_G	11	75277638	rs751575798	T	T	G	SNV
11_75277491_G_C	11	75277491	rs150061926	G	C	E G	PASS	PASS	p.Ala33Pro	p.Ala33Pro	c.97G>C	missense		39	270796	0	0.0001440	35	23148	0	0	10000	0	0	18650	0	0	24946	0	0	122994	0	3	34190	0	1	6340	0	0	30528	0	11_75277491_G_C	11	75277491	rs150061926	G	G	C	SNV
11_75277599_G_C	11	75277599	rs755858302	G	C	E	PASS	NA	p.Val69Leu	p.Val69Leu	c.205G>C	missense		1	240594	0	0.004156	1	14918	0	0	9778	0	0	17074	0	0	21094	0	0	108334	0	0	33392	0	0	5410	0	0	30594	0	11_75277599_G_C	11	75277599	rs755858302	G	G	C	SNV
11_75277521_C_T	11	75277521	rs768929258	C	T	E	PASS	NA	p.Leu43Phe	p.Leu43Phe	c.127C>T	missense		2	241360	0	0.008286	0	14704	0	0	9728	0	0	17072	0	0	21616	0	0	108834	0	2	33418	0	0	5388	0	0	30600	0	11_75277521_C_T	11	75277521	rs768929258	C	C	T	SNV
11_75277533_A_G	11	75277533	.	A	G	E	PASS	NA	p.Ser47Gly	p.Ser47Gly	c.139A>G	missense		2	241548	0	8.28e-6	0	14778	0	0	9742	0	0	17076	0	0	21614	0	2	108928	0	0	33412	0	0	5388	0	0	30610	0	11_75277533_A_G	11	75277533	.	A	A	G	SNV
11_75277543_T_A	11	75277543	rs772706450	T	A	E	PASS	NA	p.Leu50Gln	p.Leu50Gln	c.149T>A	missense		1	241986	0	0.004132	0	14856	0	1	9750	0	0	17088	0	0	21642	0	0	109194	0	0	33434	0	0	5400	0	0	30622	0	11_75277543_T_A	11	75277543	rs772706450	T	T	A	SNV
11_75279817_C_T	11	75279817	rs747743316	C	T	E	PASS	NA	p.Arg222Cys	p.Arg222Cys	c.664C>T	missense		2	246254	0	0.008122	0	15304	0	1	9850	0	0	17248	0	0	22296	0	0	111706	0	0	33582	0	0	5486	0	1	30782	0	11_75279817_C_T	11	75279817	rs747743316	C	C	T	SNV
11_75277556_G_T	11	75277556	.	G	T	E	PASS	NA	p.Leu54Phe	p.Leu54Phe	c.162G>T	missense		1	241902	0	0.004134	0	14934	0	0	9768	0	0	17110	0	0	21578	0	1	109062	0	0	33424	0	0	5404	0	0	30622	0	11_75277556_G_T	11	75277556	.	G	G	T	SNV
11_75277602_T_C	11	75277602	.	T	C	E	PASS	NA	p.Ser70Pro	p.Ser70Pro	c.208T>C	missense		1	240516	0	0.004158	0	14906	0	0	9774	0	0	17084	0	0	21080	0	0	108292	0	0	33390	0	0	5408	0	1	30582	0	11_75277602_T_C	11	75277602	.	T	T	C	SNV
11_75277605_C_G	11	75277605	rs779144412	C	G	E	PASS	NA	p.Pro71Ala	p.Pro71Ala	c.211C>G	missense		2	240206	0	0.008326	0	14884	0	0	9766	0	0	17076	0	0	20936	0	2	108184	0	0	33378	0	0	5410	0	0	30572	0	11_75277605_C_G	11	75277605	rs779144412	C	C	G	SNV
11_75277621_C_T	11	75277621	rs376824871	C	T	E G	PASS	PASS	p.Ser76Leu	p.Ser76Leu	c.227C>T	missense		37	269636	0	0.0001372	3	23484	0	0	10036	0	0	18648	0	0	23806	0	3	122636	0	25	34184	0	2	6362	0	4	30480	0	11_75277621_C_T	11	75277621	rs376824871	C	C	T	SNV
11_75277621_C_G	11	75277621	rs376824871	C	G	E	PASS	NA	p.Ser76Trp	p.Ser76Trp	c.227C>G	missense		3	238684	0	0.01257	0	14770	0	0	9734	0	0	17028	0	0	20314	0	3	107632	0	0	33346	0	0	5380	0	0	30480	0	11_75277621_C_G	11	75277621	rs376824871	C	C	G	SNV
11_75277666_C_T	11	75277666	rs750020039	C	T	E	PASS	NA	p.Ser91Leu	p.Ser91Leu	c.272C>T	missense		7	233902	0	0.02993	0	14304	0	0	9594	0	0	16828	0	0	19448	0	7	105042	0	0	33116	0	0	5278	0	0	30292	0	11_75277666_C_T	11	75277666	rs750020039	C	C	T	SNV
11_75277701_C_T	11	75277701	rs369290752	C	T	E G	RF|AC0	PASS	p.Arg103Cys	p.Arg103Cys	c.307C>T	missense		1	30922	0	0.03234	1	8706	0	0	302	0	0	1622	0	0	3490	0	0	14984	0	0	836	0	0	982	0	0	0	0	11_75277701_C_T	11	75277701	rs369290752	C	C	T	SNV
11_75277738_T_A	11	75277738	.	T	A	E	PASS	NA	p.Leu115Gln	p.Leu115Gln	c.344T>A	missense		2	234184	0	8.54e-6	1	14010	0	0	9544	0	0	16760	0	0	21566	0	0	103772	0	1	32922	0	0	5290	0	0	30320	0	11_75277738_T_A	11	75277738	.	T	T	A	SNV
11_75277740_C_T	11	75277740	rs200265134	C	T	E G	RF	PASS	p.Arg116Cys	p.Arg116Cys	c.346C>T	missense		1	30942	0	0.03232	0	8714	0	0	302	0	0	1622	0	0	3494	0	1	14990	0	0	838	0	0	982	0	0	0	0	11_75277740_C_T	11	75277740	rs200265134	C	C	T	SNV
11_75277747_T_C	11	75277747	rs751248991	T	C	E	PASS	NA	p.Leu118Pro	p.Leu118Pro	c.353T>C	missense		1	237264	0	0.004215	0	14310	0	0	9626	0	0	16964	0	0	21802	0	0	105570	0	1	33188	0	0	5344	0	0	30460	0	11_75277747_T_C	11	75277747	rs751248991	T	T	C	SNV
11_75277765_G_T	11	75277765	rs761716222	G	T	E	PASS	NA	p.Arg124Leu	p.Arg124Leu	c.371G>T	missense		1	240498	0	0.004158	0	14700	0	0	9728	0	0	17102	0	0	22126	0	1	107394	0	0	33420	0	0	5400	0	0	30628	0	11_75277765_G_T	11	75277765	rs761716222	G	G	T	SNV
11_75277765_G_C	11	75277765	rs761716222	G	C	E	PASS	NA	p.Arg124Pro	p.Arg124Pro	c.371G>C	missense		1	240498	0	0.004158	0	14700	0	0	9728	0	1	17102	0	0	22126	0	0	107394	0	0	33420	0	0	5400	0	0	30628	0	11_75277765_G_C	11	75277765	rs761716222	G	G	C	SNV
11_75279836_G_A	11	75279836	rs759994312	G	A	E	PASS	NA	p.Arg228Gln	p.Arg228Gln	c.683G>A	missense		5	246262	0	2.03e-5	0	15304	0	0	9850	0	1	17246	0	0	22294	0	2	111718	0	0	33582	0	1	5486	0	1	30782	0	11_75279836_G_A	11	75279836	rs759994312	G	G	A	SNV
11_75277795_T_C	11	75277795	.	T	C	E	PASS	NA	p.Leu134Pro	p.Leu134Pro	c.401T>C	missense		1	242970	0	0.004116	0	15070	0	0	9792	0	0	17174	0	0	22260	0	0	108956	0	1	33530	0	0	5456	0	0	30732	0	11_75277795_T_C	11	75277795	.	T	T	C	SNV
11_75277800_G_C	11	75277800	rs759183941	G	C	E	PASS	NA	p.Gly136Arg	p.Gly136Arg	c.406G>C	missense		2	242980	0	0.008231	0	15056	0	0	9794	0	1	17176	0	0	22254	0	0	108970	0	1	33532	0	0	5458	0	0	30740	0	11_75277800_G_C	11	75277800	rs759183941	G	G	C	SNV
11_75277810_C_T	11	75277810	rs757639350	C	T	E	PASS	NA	p.Ser139Leu	p.Ser139Leu	c.416C>T	missense		1	243092	0	0.004114	0	15076	0	0	9796	0	0	17172	0	0	22250	0	1	109052	0	0	33540	0	0	5468	0	0	30738	0	11_75277810_C_T	11	75277810	rs757639350	C	C	T	SNV
11_75277818_T_C	11	75277818	rs781508942	T	C	E G	PASS	PASS	p.Phe142Leu	p.Phe142Leu	c.424T>C	missense		2	274218	0	0.007293	2	23838	0	0	10108	0	0	18800	0	0	25754	0	0	124154	0	0	34378	0	0	6444	0	0	30742	0	11_75277818_T_C	11	75277818	rs781508942	T	T	C	SNV
11_75277820_C_G	11	75277820	rs371660937	C	G	E	PASS	NA	p.Phe142Leu	p.Phe142Leu	c.426C>G	missense		1	243224	0	0.004111	0	15120	0	0	9804	0	0	17176	0	0	22254	0	0	109130	0	0	33536	0	0	5462	0	1	30742	0	11_75277820_C_G	11	75277820	rs371660937	C	C	G	SNV
11_75277825_A_G	11	75277825	.	A	G	E	PASS	NA	p.Asp144Gly	p.Asp144Gly	c.431A>G	missense		1	243422	0	0.004108	0	15138	0	0	9806	0	0	17184	0	0	22262	0	0	109274	0	1	33542	0	0	5464	0	0	30752	0	11_75277825_A_G	11	75277825	.	A	A	G	SNV
11_75277851_C_A	11	75277851	.	C	A	E	PASS	NA	p.His153Asn	p.His153Asn	c.457C>A	missense		1	243706	0	0.004103	0	15200	0	0	9806	0	0	17188	0	0	22066	0	0	109676	0	0	33554	0	0	5460	0	1	30756	0	11_75277851_C_A	11	75277851	.	C	C	A	SNV
11_75277853_C_G	11	75277853	.	C	G	E	PASS	NA	p.His153Gln	p.His153Gln	c.459C>G	missense		1	243790	0	0.004102	0	15202	0	1	9812	0	0	17186	0	0	22062	0	0	109758	0	0	33556	0	0	5458	0	0	30756	0	11_75277853_C_G	11	75277853	.	C	C	G	SNV
11_75277862_C_G	11	75277862	.	C	G	E	PASS	NA	p.Cys156Trp	p.Cys156Trp	c.468C>G	missense		1	243694	0	0.004104	0	15194	0	0	9810	0	0	17182	0	0	21902	0	0	109854	0	0	33552	0	0	5450	0	1	30750	0	11_75277862_C_G	11	75277862	.	C	C	G	SNV
11_75277870_C_T	11	75277870	rs771963597	C	T	E	PASS	NA	p.Ser159Phe	p.Ser159Phe	c.476C>T	missense		9	243716	0	0.03693	0	15208	0	0	9808	0	0	17180	0	0	21792	0	4	109970	0	0	33556	0	0	5448	0	5	30754	0	11_75277870_C_T	11	75277870	rs771963597	C	C	T	SNV
11_75277880_C_G	11	75277880	rs770842307	C	G	E G	PASS	PASS	p.Asn162Lys	p.Asn162Lys	c.486C>G	missense		4	274706	0	0.01456	0	23928	0	0	10114	0	0	18808	0	0	25080	0	3	125202	0	0	34392	0	0	6426	0	1	30756	0	11_75277880_C_G	11	75277880	rs770842307	C	C	G	SNV
11_75282988_C_T	11	75282988	rs764873155	C	T	E	PASS	NA	p.Arg373Cys	p.Arg373Cys	c.1117C>T	missense		4	246048	0	0.01626	1	15282	0	0	9844	0	0	17242	0	0	22274	0	3	111562	0	0	33578	0	0	5484	0	0	30782	0	11_75282988_C_T	11	75282988	rs764873155	C	C	T	SNV
11_75277916_C_A	11	75277916	.	C	A	E	PASS	NA	p.Asn174Lys	p.Asn174Lys	c.522C>A	missense		1	241574	0	4.14e-6	0	15092	0	0	9794	0	0	17170	0	0	19558	0	0	110246	0	0	33542	0	1	5426	0	0	30746	0	11_75277916_C_A	11	75277916	.	C	C	A	SNV
11_75277941_G_A	11	75277941	rs758606932	G	A	E G	PASS	PASS	p.Gly183Ser	p.Gly183Ser	c.547G>A	missense		3	270588	0	0.01109	0	23778	0	0	10094	0	0	18740	0	0	21390	0	3	125116	0	0	34360	0	0	6402	0	0	30708	0	11_75277941_G_A	11	75277941	rs758606932	G	G	A	SNV
11_75279817_C_A	11	75279817	rs747743316	C	A	E	PASS	NA	p.Arg222Ser	p.Arg222Ser	c.664C>A	missense		1	246254	0	0.004061	0	15304	0	0	9850	0	0	17248	0	0	22296	0	0	111706	0	0	33582	0	0	5486	0	1	30782	0	11_75279817_C_A	11	75279817	rs747743316	C	C	A	SNV
11_75277941_G_C	11	75277941	rs758606932	G	C	E	PASS	NA	p.Gly183Arg	p.Gly183Arg	c.547G>C	missense		2	239616	0	0.008347	0	15048	0	0	9792	0	0	17118	0	0	17896	0	2	110110	0	0	33524	0	0	5420	0	0	30708	0	11_75277941_G_C	11	75277941	rs758606932	G	G	C	SNV
11_75277969_T_C	11	75277969	rs769259507	T	C	E	PASS	NA	p.Val192Ala	p.Val192Ala	c.575T>C	missense		1	236628	0	0.004226	0	14808	0	0	9770	0	0	17060	0	0	16014	0	0	109488	0	0	33460	0	0	5390	0	1	30638	0	11_75277969_T_C	11	75277969	rs769259507	T	T	C	SNV
11_75278000_C_G	11	75278000	.	C	G	G	NA	PASS	p.Asn202Lys	p.Asn202Lys	c.606C>G	missense		1	30950	0	0.03231	0	8728	0	0	302	0	0	1622	0	0	3494	0	1	14984	0	0	838	0	0	982	0	0	0	0	11_75278000_C_G	11	75278000	.	C	C	G	SNV
11_75278007_T_G	11	75278007	rs777869458	T	G	E	PASS	NA	p.Phe205Val	p.Phe205Val	c.613T>G	missense		1	231216	0	0.004325	0	14390	0	0	9694	0	0	17000	0	0	13204	0	0	107654	0	0	33412	0	0	5322	0	1	30540	0	11_75278007_T_G	11	75278007	rs777869458	T	T	G	SNV
11_75279808_G_A	11	75279808	.	G	A	E	PASS	NA	p.Val219Met	p.Val219Met	c.655G>A	missense		1	246244	0	0.004061	0	15304	0	0	9850	0	0	17248	0	0	22288	0	0	111710	0	0	33580	0	0	5484	0	1	30780	0	11_75279808_G_A	11	75279808	.	G	G	A	SNV
11_75279814_A_T	11	75279814	rs778537327	A	T	E	PASS	NA	p.Asn221Tyr	p.Asn221Tyr	c.661A>T	missense		1	246260	0	0.004061	0	15304	0	0	9850	0	0	17248	0	0	22296	0	1	111712	0	0	33582	0	0	5486	0	0	30782	0	11_75279814_A_T	11	75279814	rs778537327	A	A	T	SNV
11_75279818_G_A	11	75279818	rs771916875	G	A	E	PASS	NA	p.Arg222His	p.Arg222His	c.665G>A	missense		2	246252	0	0.008122	1	15302	0	0	9850	0	0	17248	0	0	22292	0	0	111710	0	0	33582	0	0	5486	0	1	30782	0	11_75279818_G_A	11	75279818	rs771916875	G	G	A	SNV
11_75279829_G_A	11	75279829	.	G	A	E	PASS	NA	p.Val226Met	p.Val226Met	c.676G>A	missense		1	246262	0	0.004061	1	15304	0	0	9850	0	0	17248	0	0	22296	0	0	111714	0	0	33582	0	0	5486	0	0	30782	0	11_75279829_G_A	11	75279829	.	G	G	A	SNV
11_75279848_T_G	11	75279848	rs763555596	T	G	E	PASS	NA	p.Val232Gly	p.Val232Gly	c.695T>G	missense		2	246236	0	0.008122	2	15296	0	0	9850	0	0	17248	0	0	22298	0	0	111706	0	0	33578	0	0	5486	0	0	30774	0	11_75279848_T_G	11	75279848	rs763555596	T	T	G	SNV
11_75279864_G_A	11	75279864	.	G	A	E	PASS	NA	p.Met237Ile	p.Met237Ile	c.711G>A	missense		1	246252	0	0.004061	0	15304	0	0	9850	0	0	17248	0	1	22288	0	0	111714	0	0	33582	0	0	5484	0	0	30782	0	11_75279864_G_A	11	75279864	.	G	G	A	SNV
11_75279868_C_T	11	75279868	rs767729275	C	T	E	PASS	NA	p.Arg239Trp	p.Arg239Trp	c.715C>T	missense		2	246248	0	0.008122	0	15304	0	0	9850	0	1	17248	0	0	22290	0	1	111706	0	0	33582	0	0	5486	0	0	30782	0	11_75279868_C_T	11	75279868	rs767729275	C	C	T	SNV
11_75279984_G_T	11	75279984	rs767688879	G	T	E	PASS	NA	p.Gly241Val	p.Gly241Val	c.722G>T	missense		3	245950	0	1.22e-5	0	15302	0	3	9848	0	0	17248	0	0	22022	0	0	111682	0	0	33582	0	0	5484	0	0	30782	0	11_75279984_G_T	11	75279984	rs767688879	G	G	T	SNV
11_75280020_T_C	11	75280020	.	T	C	E	PASS	NA	p.Leu253Pro	p.Leu253Pro	c.758T>C	missense		1	246168	0	0.004062	0	15304	0	0	9850	0	0	17248	0	0	22210	0	1	111706	0	0	33582	0	0	5486	0	0	30782	0	11_75280020_T_C	11	75280020	.	T	T	C	SNV
11_75280037_C_A	11	75280037	.	C	A	E	PASS	NA	p.Pro259Thr	p.Pro259Thr	c.775C>A	missense		1	246202	0	0.004062	0	15304	0	0	9850	0	0	17248	0	0	22240	0	0	111710	0	1	33582	0	0	5486	0	0	30782	0	11_75280037_C_A	11	75280037	.	C	C	A	SNV
11_75280038_C_T	11	75280038	rs768984519	C	T	E G	PASS	PASS	p.Pro259Leu	p.Pro259Leu	c.776C>T	missense		3	277150	0	0.01082	0	24024	0	0	10152	0	0	18868	0	0	25742	0	3	126696	0	0	34420	0	0	6466	0	0	30782	0	11_75280038_C_T	11	75280038	rs768984519	C	C	T	SNV
11_75280040_C_G	11	75280040	rs774942194	C	G	E	PASS	NA	p.Leu260Val	p.Leu260Val	c.778C>G	missense		3	246226	0	0.01218	1	15304	0	0	9850	0	0	17248	0	0	22258	0	2	111716	0	0	33582	0	0	5486	0	0	30782	0	11_75280040_C_G	11	75280040	rs774942194	C	C	G	SNV
11_75280088_G_A	11	75280088	rs776233451	G	A	E	PASS	NA	p.Glu276Lys	p.Glu276Lys	c.826G>A	missense		1	246266	0	0.004061	0	15304	0	0	9850	0	0	17248	0	0	22296	0	1	111718	0	0	33582	0	0	5486	0	0	30782	0	11_75280088_G_A	11	75280088	rs776233451	G	G	A	SNV
11_75277900_C_T	11	75277900	rs750807661	C	T	E	PASS	NA	p.Ala169Val	p.Ala169Val	c.506C>T	missense		3	242568	0	0.01237	0	15156	0	0	9808	0	0	17176	0	0	20436	0	3	110246	0	0	33544	0	0	5444	0	0	30758	0	11_75277900_C_T	11	75277900	rs750807661	C	C	T	SNV
11_75282985_G_A	11	75282985	rs200180052	G	A	E	PASS	NA	p.Gly372Arg	p.Gly372Arg	c.1114G>A	missense		9	246048	0	0.03658	0	15282	0	0	9842	0	0	17240	0	0	22278	0	5	111566	0	1	33578	0	0	5484	0	3	30778	0	11_75282985_G_A	11	75282985	rs200180052	G	G	A	SNV
11_75283001_G_A	11	75283001	rs779029499	G	A	E	PASS	NA	p.Arg377His	p.Arg377His	c.1130G>A	missense		2	245958	0	0.008131	0	15292	0	0	9838	0	0	17234	0	0	22254	0	1	111506	0	1	33574	0	0	5484	0	0	30776	0	11_75283001_G_A	11	75283001	rs779029499	G	G	A	SNV
11_75280089_A_C	11	75280089	rs148613550	A	C	E	PASS	NA	p.Glu276Ala	p.Glu276Ala	c.827A>C	missense		3	246262	0	0.01218	0	15304	0	0	9850	0	0	17248	0	0	22296	0	3	111714	0	0	33582	0	0	5486	0	0	30782	0	11_75280089_A_C	11	75280089	rs148613550	A	A	C	SNV
11_75280100_C_T	11	75280100	rs200572997	C	T	E G	PASS	RF	p.Arg280Cys	p.Arg280Cys	c.838C>T	missense		1	246262	0	0.004061	0	15302	0	0	9850	0	1	17248	0	0	22296	0	0	111716	0	0	33582	0	0	5486	0	0	30782	0	11_75280100_C_T	11	75280100	rs200572997	C	C	T	SNV
11_75282965_C_T	11	75282965	rs574281910	C	T	E	PASS	NA	p.Pro365Leu	p.Pro365Leu	c.1094C>T	missense		1	246120	0	0.004063	1	15290	0	0	9842	0	0	17244	0	0	22286	0	0	111610	0	0	33580	0	0	5486	0	0	30782	0	11_75282965_C_T	11	75282965	rs574281910	C	C	T	SNV
11_75280100_C_A	11	75280100	rs200572997	C	A	E	PASS	NA	p.Arg280Ser	p.Arg280Ser	c.838C>A	missense		2	246262	0	0.008121	0	15302	0	0	9850	0	2	17248	0	0	22296	0	0	111716	0	0	33582	0	0	5486	0	0	30782	0	11_75280100_C_A	11	75280100	rs200572997	C	C	A	SNV
11_75280101_G_A	11	75280101	rs370057420	G	A	E	PASS	NA	p.Arg280His	p.Arg280His	c.839G>A	missense		6	246252	0	0.02437	0	15302	0	0	9850	0	0	17244	0	0	22296	0	4	111712	0	0	33582	0	2	5486	0	0	30780	0	11_75280101_G_A	11	75280101	rs370057420	G	G	A	SNV
11_75280203_C_T	11	75280203	rs747053861	C	T	E	PASS	NA	p.Thr314Ile	p.Thr314Ile	c.941C>T	missense		1	235332	0	0.004249	0	14194	0	0	9630	0	0	16508	0	0	21414	0	1	105810	0	0	32540	0	0	5342	0	0	29894	0	11_75280203_C_T	11	75280203	rs747053861	C	C	T	SNV
11_75282847_C_G	11	75282847	.	C	G	E	PASS	NA	p.Leu326Val	p.Leu326Val	c.976C>G	missense		1	245494	0	0.004073	0	15218	0	0	9834	0	0	17216	0	0	22226	0	0	111176	0	0	33572	0	0	5474	0	1	30778	0	11_75282847_C_G	11	75282847	.	C	C	G	SNV
11_75279847_G_A	11	75279847	rs534696801	G	A	E	PASS	NA	p.Val232Met	p.Val232Met	c.694G>A	missense		3	246234	0	0.01218	0	15296	0	0	9850	0	1	17248	0	0	22296	0	2	111704	0	0	33578	0	0	5486	0	0	30776	0	11_75279847_G_A	11	75279847	rs534696801	G	G	A	SNV
11_75282853_G_A	11	75282853	rs749048421	G	A	E	PASS	NA	p.Glu328Lys	p.Glu328Lys	c.982G>A	missense		1	245662	0	0.004071	0	15236	0	0	9834	0	0	17218	0	0	22244	0	0	111310	0	0	33570	0	0	5474	0	1	30776	0	11_75282853_G_A	11	75282853	rs749048421	G	G	A	SNV
11_75277893_C_A	11	75277893	rs764819709	C	A	E	PASS	NA	p.Arg167Ser	p.Arg167Ser	c.499C>A	missense		2	243080	0	0.008228	0	15178	0	0	9814	0	0	17184	0	0	20894	0	0	110254	0	2	33554	0	0	5442	0	0	30760	0	11_75277893_C_A	11	75277893	rs764819709	C	C	A	SNV
11_75282886_C_T	11	75282886	rs760125834	C	T	E G	PASS	PASS	p.Arg339Cys	p.Arg339Cys	c.1015C>T	missense		18	277014	0	0.06498	1	24010	0	0	10146	0	0	18860	0	0	25786	0	6	126558	0	0	34414	0	2	6458	0	9	30782	0	11_75282886_C_T	11	75282886	rs760125834	C	C	T	SNV
11_75282917_C_A	11	75282917	.	C	A	E	PASS	NA	p.Ala349Asp	p.Ala349Asp	c.1046C>A	missense		1	246116	0	0.004063	0	15292	0	0	9846	0	0	17240	0	0	22294	0	1	111602	0	0	33578	0	0	5484	0	0	30780	0	11_75282917_C_A	11	75282917	.	C	C	A	SNV
11_75282931_G_A	11	75282931	rs369550626	G	A	E G	PASS	PASS	p.Ala354Thr	p.Ala354Thr	c.1060G>A	missense		3	277062	0	0.01083	1	24016	0	0	10150	0	0	18862	0	0	25786	0	2	126586	0	0	34416	0	0	6464	0	0	30782	0	11_75282931_G_A	11	75282931	rs369550626	G	G	A	SNV
11_75283018_T_A	11	75283018	rs746933828	T	A	E	PASS	NA	p.Tyr383Asn	p.Tyr383Asn	c.1147T>A	missense		1	246012	0	0.004065	0	15292	0	0	9844	0	0	17238	0	0	22246	0	1	111558	0	0	33580	0	0	5478	0	0	30776	0	11_75283018_T_A	11	75283018	rs746933828	T	T	A	SNV
11_75282926_T_A	11	75282926	.	T	A	E	PASS	NA	p.Phe352Tyr	p.Phe352Tyr	c.1055T>A	missense		2	246138	0	0.008126	0	15292	0	0	9846	0	0	17240	0	2	22294	0	0	111624	0	0	33576	0	0	5484	0	0	30782	0	11_75282926_T_A	11	75282926	.	T	T	A	SNV
11_75280196_G_A	11	75280196	.	G	A	E	PASS	NA	p.Glu312Lys	p.Glu312Lys	c.934G>A	missense		1	239588	0	0.004174	0	14662	0	0	9708	0	0	16796	0	0	21792	0	1	108058	0	0	32974	0	0	5384	0	0	30214	0	11_75280196_G_A	11	75280196	.	G	G	A	SNV
11_75282887_G_A	11	75282887	rs535510332	G	A	E	PASS	NA	p.Arg339His	p.Arg339His	c.1016G>A	missense		1	246056	0	0.004064	0	15286	0	0	9838	0	0	17240	0	0	22290	0	1	111566	0	0	33574	0	0	5480	0	0	30782	0	11_75282887_G_A	11	75282887	rs535510332	G	G	A	SNV
11_75282989_G_A	11	75282989	rs774719472	G	A	E G	PASS	PASS	p.Arg373His	p.Arg373His	c.1118G>A	missense		2	276952	0	0.007221	2	24010	0	0	10148	0	0	18864	0	0	25756	0	0	126510	0	0	34416	0	0	6466	0	0	30782	0	11_75282989_G_A	11	75282989	rs774719472	G	G	A	SNV
11_75282995_A_T	11	75282995	rs545800102	A	T	E	PASS	NA	p.Glu375Val	p.Glu375Val	c.1124A>T	missense		1	246036	0	0.004064	0	15288	0	0	9840	0	0	17242	0	0	22268	0	0	111556	0	0	33576	0	0	5486	0	1	30780	0	11_75282995_A_T	11	75282995	rs545800102	A	A	T	SNV
11_75282929_A_G	11	75282929	rs780318111	A	G	E	PASS	NA	p.His353Arg	p.His353Arg	c.1058A>G	missense		1	246134	0	0.004063	0	15290	0	0	9846	0	0	17242	0	0	22296	0	1	111618	0	0	33578	0	0	5484	0	0	30780	0	11_75282929_A_G	11	75282929	rs780318111	A	A	G	SNV
11_75283000_C_T	11	75283000	rs576211302	C	T	E	PASS	NA	p.Arg377Cys	p.Arg377Cys	c.1129C>T	missense		2	246014	0	8.13e-6	0	15286	0	0	9842	0	0	17244	0	0	22266	0	2	111534	0	0	33580	0	0	5486	0	0	30776	0	11_75283000_C_T	11	75283000	rs576211302	C	C	T	SNV
11_75277863_G_A	11	75277863	.	G	A	E	PASS	NA	p.Glu157Lys	p.Glu157Lys	c.469G>A	missense		2	243646	0	0.008209	0	15200	0	0	9812	0	2	17180	0	0	21880	0	0	109820	0	0	33554	0	0	5448	0	0	30752	0	11_75277863_G_A	11	75277863	.	G	G	A	SNV
11_75283021_G_A	11	75283021	rs200974428	G	A	E G	PASS	PASS	p.Ala384Thr	p.Ala384Thr	c.1150G>A	missense		5	276868	0	0.01806	0	24010	0	0	10146	0	0	18856	0	0	25726	0	3	126488	0	0	34410	0	1	6460	0	1	30772	0	11_75283021_G_A	11	75283021	rs200974428	G	G	A	SNV
11_75283085_G_A	11	75283085	rs781125078	G	A	E	PASS	NA	p.Arg405His	p.Arg405His	c.1214G>A	missense		2	245834	0	0.008136	0	15252	0	0	9840	0	0	17238	0	0	22264	0	2	111418	0	0	33570	0	0	5476	0	0	30776	0	11_75283085_G_A	11	75283085	rs781125078	G	G	A	SNV
11_75283067_C_T	11	75283067	rs376520307	C	T	E	PASS	NA	p.Ser399Phe	p.Ser399Phe	c.1196C>T	missense		2	245910	0	0.008133	0	15252	0	0	9834	0	0	17240	0	0	22262	0	2	111494	0	0	33576	0	0	5476	0	0	30776	0	11_75283067_C_T	11	75283067	rs376520307	C	C	T	SNV
11_75277917_G_A	11	75277917	rs766813083	G	A	E G	PASS	PASS	p.Glu175Lys	p.Glu175Lys	c.523G>A	missense		4	272458	0	0.01468	0	23824	0	0	10098	0	0	18790	0	0	23012	0	4	125204	0	0	34380	0	0	6406	0	0	30744	0	11_75277917_G_A	11	75277917	rs766813083	G	G	A	SNV
11_75283067_C_A	11	75283067	rs376520307	C	A	E	PASS	NA	p.Ser399Tyr	p.Ser399Tyr	c.1196C>A	missense		1	245910	0	0.004067	0	15252	0	0	9834	0	0	17240	0	0	22262	0	1	111494	0	0	33576	0	0	5476	0	0	30776	0	11_75283067_C_A	11	75283067	rs376520307	C	C	A	SNV
11_75282867_G_C	11	75282867	rs147936395	G	C	E	PASS	NA	p.Lys332Asn	p.Lys332Asn	c.996G>C	missense		2	245900	0	0.008133	0	15276	0	0	9838	0	0	17226	0	0	22276	0	2	111458	0	0	33572	0	0	5472	0	0	30782	0	11_75282867_G_C	11	75282867	rs147936395	G	G	C	SNV
11_75280092_C_A	11	75280092	.	C	A	E	PASS	NA	p.Pro277His	p.Pro277His	c.830C>A	missense		1	246262	0	0.004061	0	15302	0	0	9850	0	0	17248	0	0	22294	0	1	111718	0	0	33582	0	0	5486	0	0	30782	0	11_75280092_C_A	11	75280092	.	C	C	A	SNV
11_75283070_T_A	11	75283070	.	T	A	E	PASS	NA	p.Leu400Gln	p.Leu400Gln	c.1199T>A	missense		1	245884	0	0.004067	0	15246	0	0	9838	0	0	17240	0	0	22254	0	1	111488	0	0	33572	0	0	5472	0	0	30774	0	11_75283070_T_A	11	75283070	.	T	T	A	SNV
11_75279804_G_T	11	75279804	.	G	T	E G	PASS	PASS	p.Lys217Asn	p.Lys217Asn	c.651G>T	missense		3	277194	0	0.01082	0	24026	0	0	10152	0	0	18868	0	0	25778	0	2	126706	0	0	34418	0	1	6464	0	0	30782	0	11_75279804_G_T	11	75279804	.	G	G	T	SNV
11_75280004_G_C	11	75280004	rs765236669	G	C	E	PASS	NA	p.Asp248His	p.Asp248His	c.742G>C	missense		2	246050	0	0.008128	0	15302	0	0	9848	0	0	17248	0	0	22104	0	0	111700	0	0	33582	0	0	5484	0	2	30782	0	11_75280004_G_C	11	75280004	rs765236669	G	G	C	SNV
11_75277837_G_A	11	75277837	.	G	A	G	NA	PASS	p.Arg148His	p.Arg148His	c.443G>A	missense		1	30960	0	3.23e-5	1	8718	0	0	302	0	0	1622	0	0	3494	0	0	15004	0	0	838	0	0	982	0	0	0	0	11_75277837_G_A	11	75277837	.	G	G	A	SNV
11_75283084_C_T	11	75283084	rs757124438	C	T	E	PASS	NA	p.Arg405Cys	p.Arg405Cys	c.1213C>T	missense		1	245874	0	0.004067	0	15256	0	0	9844	0	0	17234	0	0	22264	0	1	111450	0	0	33570	0	0	5476	0	0	30780	0	11_75283084_C_T	11	75283084	rs757124438	C	C	T	SNV
11_75282932_C_G	11	75282932	.	C	G	E	PASS	NA	p.Ala354Gly	p.Ala354Gly	c.1061C>G	missense		1	246134	0	0.004063	0	15292	0	0	9846	0	0	17240	0	0	22296	0	0	111622	0	1	33576	0	0	5480	0	0	30782	0	11_75282932_C_G	11	75282932	.	C	C	G	SNV
11_75277808_C_A	11	75277808	rs751862278	C	A	E	PASS	NA	p.Ser138Arg	p.Ser138Arg	c.414C>A	missense		1	243112	0	0.004113	0	15074	0	0	9796	0	0	17176	0	0	22256	0	0	109070	0	0	33540	0	1	5468	0	0	30732	0	11_75277808_C_A	11	75277808	rs751862278	C	C	A	SNV
11_75279867_C_A	11	75279867	rs761932276	C	A	E	PASS	NA	p.His238Gln	p.His238Gln	c.714C>A	missense		1	246254	0	0.004061	0	15302	0	0	9850	0	0	17248	0	0	22294	0	1	111714	0	0	33580	0	0	5486	0	0	30780	0	11_75279867_C_A	11	75279867	rs761932276	C	C	A	SNV
11_75280175_T_C	11	75280175	rs549207386	T	C	E	PASS	NA	p.Ser305Pro	p.Ser305Pro	c.913T>C	missense		1	244662	0	0.004087	0	15130	0	0	9826	0	0	17130	0	0	22184	0	0	110820	0	0	33468	0	0	5458	0	1	30646	0	11_75280175_T_C	11	75280175	rs549207386	T	T	C	SNV
11_75282922_G_A	11	75282922	rs368336245	G	A	E G	PASS	PASS	p.Val351Met	p.Val351Met	c.1051G>A	missense		2	277084	0	0.007218	0	24020	0	0	10148	0	0	18858	0	0	25790	0	1	126604	0	0	34416	0	1	6466	0	0	30782	0	11_75282922_G_A	11	75282922	rs368336245	G	G	A	SNV
11_75283012_C_G	11	75283012	.	C	G	E	PASS	NA	p.Leu381Val	p.Leu381Val	c.1141C>G	missense		1	245990	0	0.004065	0	15292	0	0	9840	0	0	17240	0	0	22250	0	0	111532	0	0	33578	0	0	5480	0	1	30778	0	11_75283012_C_G	11	75283012	.	C	C	G	SNV
11_75277927_C_T	11	75277927	rs755143041	C	T	E	PASS	NA	p.Ala178Val	p.Ala178Val	c.533C>T	missense		3	240386	0	0.01248	0	15050	0	0	9774	0	0	17158	0	0	18618	0	2	110092	0	1	33534	0	0	5422	0	0	30738	0	11_75277927_C_T	11	75277927	rs755143041	C	C	T	SNV
11_75280164_C_G	11	75280164	rs764127543	C	G	E	PASS	NA	p.Ala301Gly	p.Ala301Gly	c.902C>G	missense		1	245428	0	0.004075	0	15216	0	0	9832	0	0	17188	0	0	22224	0	0	111254	0	0	33524	0	0	5464	0	1	30726	0	11_75280164_C_G	11	75280164	rs764127543	C	C	G	SNV
11_75282887_G_T	11	75282887	rs535510332	G	T	E	PASS	NA	p.Arg339Leu	p.Arg339Leu	c.1016G>T	missense		6	246056	0	0.02438	0	15286	0	0	9838	0	2	17240	0	0	22290	0	1	111566	0	1	33574	0	0	5480	0	2	30782	0	11_75282887_G_T	11	75282887	rs535510332	G	G	T	SNV
11_75283048_C_T	11	75283048	rs527863136	C	T	E	PASS	NA	p.Arg393Trp	p.Arg393Trp	c.1177C>T	missense		7	245926	0	0.02846	1	15266	0	0	9840	0	0	17238	0	0	22264	0	4	111480	0	0	33578	0	1	5486	0	1	30774	0	11_75283048_C_T	11	75283048	rs527863136	C	C	T	SNV
11_75279778_C_T	11	75279778	rs755976024	C	T	E	PASS	NA	p.His209Tyr	p.His209Tyr	c.625C>T	missense		3	246192	0	0.01219	0	15304	0	0	9848	0	0	17248	0	0	22270	0	1	111680	0	1	33578	0	1	5486	0	0	30778	0	11_75279778_C_T	11	75279778	rs755976024	C	C	T	SNV
11_75283093_C_T	11	75283093	rs769154335	C	T	E	PASS	NA	p.Arg408Trp	p.Arg408Trp	c.1222C>T	missense		7	245856	0	0.02847	0	15248	0	0	9838	0	0	17240	0	0	22270	0	1	111430	0	4	33574	0	0	5476	0	2	30780	0	11_75283093_C_T	11	75283093	rs769154335	C	C	T	SNV
11_75280052_C_T	11	75280052	.	C	T	G	NA	PASS	p.Leu264Phe	p.Leu264Phe	c.790C>T	missense		1	30948	0	0.03231	1	8728	0	0	302	0	0	1622	0	0	3492	0	0	14984	0	0	838	0	0	982	0	0	0	0	11_75280052_C_T	11	75280052	.	C	C	T	SNV
11_75282913_C_G	11	75282913	rs757716271	C	G	G	NA	PASS	p.Leu348Val	p.Leu348Val	c.1042C>G	missense		1	30954	0	0.03231	0	8730	0	0	302	0	1	1622	0	0	3494	0	0	14986	0	0	838	0	0	982	0	0	0	0	11_75282913_C_G	11	75282913	rs757716271	C	C	G	SNV
11_75283109_A_G	11	75283109	rs777250907	A	G	E	PASS	NA	p.Lys413Arg	p.Lys413Arg	c.1238A>G	missense		1	245810	0	0.004068	0	15236	0	0	9834	0	1	17238	0	0	22270	0	0	111412	0	0	33572	0	0	5468	0	0	30780	0	11_75283109_A_G	11	75283109	rs777250907	A	A	G	SNV
11_75277635_G_C	11	75277635	.	G	C	G	NA	PASS	p.Val81Leu	p.Val81Leu	c.241G>C	missense		3	30936	0	0.09697	0	8706	0	0	300	0	0	1622	0	0	3492	0	3	14996	0	0	838	0	0	982	0	0	0	0	11_75277635_G_C	11	75277635	.	G	G	C	SNV
11_75277699_T_A	11	75277699	rs377583721	T	A	E	PASS	NA	p.Leu102Gln	p.Leu102Gln	c.305T>A	missense		5	230106	0	0.02173	0	13848	0	0	9502	0	0	16602	0	0	20204	0	5	102014	0	0	32698	0	0	5202	0	0	30036	0	11_75277699_T_A	11	75277699	rs377583721	T	T	A	SNV
11_75277733_G_C	11	75277733	rs763945752	G	C	E	PASS	NA	p.Glu113Asp	p.Glu113Asp	c.339G>C	missense		1	232494	0	0.004301	0	13858	0	0	9516	0	0	16650	0	0	21388	0	1	102834	0	0	32774	0	0	5244	0	0	30230	0	11_75277733_G_C	11	75277733	rs763945752	G	G	C	SNV
11_75282850_A_G	11	75282850	rs780442561	A	G	E	PASS	NA	p.Thr327Ala	p.Thr327Ala	c.979A>G	missense		1	245620	0	0.004071	0	15230	0	0	9834	0	0	17220	0	0	22244	0	1	111266	0	0	33572	0	0	5474	0	0	30780	0	11_75282850_A_G	11	75282850	rs780442561	A	A	G	SNV
11_75283105_G_A	11	75283105	rs761143786	G	A	E	PASS	NA	p.Asp412Asn	p.Asp412Asn	c.1234G>A	missense		1	245782	0	0.004069	0	15238	0	0	9832	0	0	17236	0	0	22272	0	0	111394	0	0	33568	0	0	5466	0	1	30776	0	11_75283105_G_A	11	75283105	rs761143786	G	G	A	SNV
11_75277969_T_G	11	75277969	rs769259507	T	G	E	PASS	NA	p.Val192Gly	p.Val192Gly	c.575T>G	missense		2	236628	0	0.008452	0	14808	0	0	9770	0	0	17060	0	0	16014	0	0	109488	0	0	33460	0	0	5390	0	2	30638	0	11_75277969_T_G	11	75277969	rs769259507	T	T	G	SNV
11_75279842_A_G	11	75279842	.	A	G	E G	PASS	RF	p.Tyr230Cys	p.Tyr230Cys	c.689A>G	missense		1	246266	0	0.004061	0	15304	0	0	9850	0	0	17248	0	0	22298	0	1	111716	0	0	33582	0	0	5486	0	0	30782	0	11_75279842_A_G	11	75279842	.	A	A	G	SNV
11_75283114_C_G	11	75283114	rs149137596	C	G	G	NA	PASS	p.Arg415Gly	p.Arg415Gly	c.1243C>G	missense		1	30930	0	0.03233	1	8722	0	0	300	0	0	1622	0	0	3494	0	0	14972	0	0	838	0	0	982	0	0	0	0	11_75283114_C_G	11	75283114	rs149137596	C	C	G	SNV
11_75280097_G_A	11	75280097	rs758458147	G	A	E	PASS	NA	p.Glu279Lys	p.Glu279Lys	c.835G>A	missense		2	246256	0	0.008122	0	15302	0	0	9850	0	0	17248	0	0	22294	0	2	111712	0	0	33582	0	0	5486	0	0	30782	0	11_75280097_G_A	11	75280097	rs758458147	G	G	A	SNV
11_75280188_G_A	11	75280188	rs753068848	G	A	E	PASS	NA	p.Gly309Asp	p.Gly309Asp	c.926G>A	missense		3	241986	0	1.24e-5	0	14864	0	0	9772	0	0	16962	0	0	21958	0	1	109396	0	0	33188	0	1	5426	0	1	30420	0	11_75280188_G_A	11	75280188	rs753068848	G	G	A	SNV
11_75282865_A_G	11	75282865	.	A	G	E	PASS	NA	p.Lys332Glu	p.Lys332Glu	c.994A>G	missense		1	245898	0	0.004067	0	15268	0	0	9844	0	1	17226	0	0	22278	0	0	111454	0	0	33574	0	0	5472	0	0	30782	0	11_75282865_A_G	11	75282865	.	A	A	G	SNV
11_75280091_C_A	11	75280091	rs765044030	C	A	E	PASS	NA	p.Pro277Thr	p.Pro277Thr	c.829C>A	missense		1	246262	0	0.004061	0	15300	0	0	9850	0	0	17248	0	0	22296	0	1	111718	0	0	33582	0	0	5486	0	0	30782	0	11_75280091_C_A	11	75280091	rs765044030	C	C	A	SNV
11_75277873_A_G	11	75277873	.	A	G	E	PASS	NA	p.Lys160Arg	p.Lys160Arg	c.479A>G	missense		2	243840	0	0.008202	0	15212	0	0	9814	0	0	17184	0	0	21792	0	2	110080	0	0	33556	0	0	5450	0	0	30752	0	11_75277873_A_G	11	75277873	.	A	A	G	SNV
11_75282877_G_A	11	75282877	rs771911618	G	A	E	PASS	NA	p.Asp336Asn	p.Asp336Asn	c.1006G>A	missense		5	246002	0	0.02033	0	15282	0	0	9842	0	0	17236	0	0	22286	0	1	111520	0	0	33576	0	0	5480	0	4	30780	0	11_75282877_G_A	11	75282877	rs771911618	G	G	A	SNV
11_75283115_G_A	11	75283115	rs760141322	G	A	E	PASS	NA	p.Arg415Gln	p.Arg415Gln	c.1244G>A	missense		2	245664	0	0.008141	0	15230	0	0	9828	0	0	17236	0	0	22252	0	1	111306	0	0	33560	0	0	5472	0	1	30780	0	11_75283115_G_A	11	75283115	rs760141322	G	G	A	SNV
11_75279986_C_T	11	75279986	.	C	T	E	PASS	NA	p.Leu242Phe	p.Leu242Phe	c.724C>T	missense		1	246008	0	0.004065	0	15302	0	1	9848	0	0	17248	0	0	22066	0	0	111696	0	0	33582	0	0	5484	0	0	30782	0	11_75279986_C_T	11	75279986	.	C	C	T	SNV
11_75280145_G_C	11	75280145	.	G	C	E G	PASS	PASS	p.Gly295Arg	p.Gly295Arg	c.883G>C	missense		10	276998	0	3.61e-5	0	24026	0	0	10148	0	0	18854	0	0	25778	0	9	126534	0	0	34414	0	1	6464	0	0	30780	0	11_75280145_G_C	11	75280145	.	G	G	C	SNV
11_75283009_A_C	11	75283009	.	A	C	E	PASS	NA	p.Lys380Gln	p.Lys380Gln	c.1138A>C	missense		1	246014	0	0.004065	0	15288	0	0	9842	0	0	17240	0	0	22252	0	1	111554	0	0	33578	0	0	5480	0	0	30780	0	11_75283009_A_C	11	75283009	.	A	A	C	SNV
11_75283090_G_C	11	75283090	rs138241050	G	C	E G	PASS	PASS	p.Val407Leu	p.Val407Leu	c.1219G>C	missense		115	276826	0	0.0004154	109	23970	0	0	10140	0	0	18858	0	0	25766	0	1	126442	0	4	34412	0	1	6458	0	0	30780	0	11_75283090_G_C	11	75283090	rs138241050	G	G	C	SNV
11_75279780_C_G	11	75279780	rs569867446	C	G	E G	PASS	PASS	p.His209Gln	p.His209Gln	c.627C>G	missense		3	277146	0	0.01082	0	24016	0	0	10152	0	3	18868	0	0	25768	0	0	126684	0	0	34418	0	0	6462	0	0	30778	0	11_75279780_C_G	11	75279780	rs569867446	C	C	G	SNV
11_75280008_A_G	11	75280008	rs777463655	A	G	E	PASS	NA	p.Glu249Gly	p.Glu249Gly	c.746A>G	missense		1	246104	0	0.004063	1	15302	0	0	9850	0	0	17248	0	0	22148	0	0	111706	0	0	33582	0	0	5486	0	0	30782	0	11_75280008_A_G	11	75280008	rs777463655	A	A	G	SNV
11_75280153_G_A	11	75280153	rs200106884	G	A	E	PASS	NA	p.Met297Ile	p.Met297Ile	c.891G>A	missense		1	245838	0	0.004068	0	15270	0	0	9844	0	0	17216	0	0	22270	0	1	111430	0	0	33570	0	0	5478	0	0	30760	0	11_75280153_G_A	11	75280153	rs200106884	G	G	A	SNV
11_75280185_A_G	11	75280185	rs142663000	A	G	E G	PASS	PASS	p.Lys308Arg	p.Lys308Arg	c.923A>G	missense		6	274052	0	0.02189	1	23718	0	0	10084	0	0	18662	0	0	25548	0	5	124974	0	0	34154	0	0	6422	0	0	30490	0	11_75280185_A_G	11	75280185	rs142663000	A	A	G	SNV
11_75283049_G_A	11	75283049	rs772299825	G	A	E G	PASS	PASS	p.Arg393Gln	p.Arg393Gln	c.1178G>A	missense		6	276842	0	0.02167	3	23988	0	0	10148	0	0	18860	0	0	25750	0	1	126446	0	1	34412	0	1	6464	0	0	30774	0	11_75283049_G_A	11	75283049	rs772299825	G	G	A	SNV
11_75283094_G_A	11	75283094	rs371699925	G	A	E G	PASS	PASS	p.Arg408Gln	p.Arg408Gln	c.1223G>A	missense		9	276780	0	0.03252	0	23976	0	0	10138	0	0	18852	0	1	25756	0	1	126416	0	4	34408	0	0	6456	0	3	30778	0	11_75283094_G_A	11	75283094	rs371699925	G	G	A	SNV
11_75283119_C_G	11	75283119	rs145015985	C	G	E	PASS	NA	p.Asp416Glu	p.Asp416Glu	c.1248C>G	missense		1	245558	0	0.004072	0	15200	0	0	9830	0	1	17230	0	0	22250	0	0	111240	0	0	33560	0	0	5474	0	0	30774	0	11_75283119_C_G	11	75283119	rs145015985	C	C	G	SNV
11_75282996_G_T	11	75282996	rs562306544	G	T	E	PASS	NA	p.Glu375Asp	p.Glu375Asp	c.1125G>T	missense		1	246038	0	0.004064	0	15288	0	0	9844	0	0	17242	0	0	22276	0	1	111548	0	0	33574	0	0	5486	0	0	30780	0	11_75282996_G_T	11	75282996	rs562306544	G	G	T	SNV
11_75283096_C_G	11	75283096	.	C	G	E	PASS	NA	p.Pro409Ala	p.Pro409Ala	c.1225C>G	missense		1	245868	0	0.004067	0	15248	0	0	9842	0	0	17238	0	0	22274	0	1	111444	0	0	33568	0	0	5476	0	0	30778	0	11_75283096_C_G	11	75283096	.	C	C	G	SNV
11_75280153_G_T	11	75280153	rs200106884	G	T	E G	PASS	PASS	p.Met297Ile	p.Met297Ile	c.891G>T	missense		6	276792	0	0.02168	0	24000	0	0	10142	0	0	18838	0	0	25762	0	5	126422	0	1	34408	0	0	6460	0	0	30760	0	11_75280153_G_T	11	75280153	rs200106884	G	G	T	SNV
11_75280028_G_A	11	75280028	rs749664592	G	A	E	PASS	NA	p.Val256Met	p.Val256Met	c.766G>A	missense		6	246178	0	0.02437	0	15304	0	0	9850	0	0	17248	0	0	22224	0	0	111704	0	0	33582	0	0	5486	0	6	30780	0	11_75280028_G_A	11	75280028	rs749664592	G	G	A	SNV
11_75282980_T_C	11	75282980	rs758312076	T	C	E	PASS	NA	p.Ile370Thr	p.Ile370Thr	c.1109T>C	missense		3	246090	0	0.01219	0	15284	0	0	9844	0	0	17240	0	0	22284	0	3	111594	0	0	33578	0	0	5484	0	0	30782	0	11_75282980_T_C	11	75282980	rs758312076	T	T	C	SNV
11_75283099_A_G	11	75283099	rs773655408	A	G	E	PASS	NA	p.Lys410Glu	p.Lys410Glu	c.1228A>G	missense		8	245874	0	0.03254	0	15254	0	0	9834	0	0	17236	0	0	22274	0	0	111448	0	8	33574	0	0	5474	0	0	30780	0	11_75283099_A_G	11	75283099	rs773655408	A	A	G	SNV
11_75277803_C_G	11	75277803	rs764873239	C	G	E G	PASS	PASS	p.Pro137Ala	p.Pro137Ala	c.409C>G	missense		5	274076	0	0.01824	5	23798	0	0	10098	0	0	18796	0	0	25758	0	0	124062	0	0	34376	0	0	6446	0	0	30742	0	11_75277803_C_G	11	75277803	rs764873239	C	C	G	SNV
11_75283120_G_A	11	75283120	.	G	A	G	NA	PASS	p.Glu417Lys	p.Glu417Lys	c.1249G>A	missense		1	30920	0	0.03234	0	8722	0	0	302	0	0	1622	0	0	3494	0	1	14960	0	0	838	0	0	982	0	0	0	0	11_75283120_G_A	11	75283120	.	G	G	A	SNV
11_75277744_C_T	11	75277744	rs571009837	C	T	E G	PASS	PASS	p.Ser117Leu	p.Ser117Leu	c.350C>T	missense		3	267222	0	0.01123	3	22970	0	0	9906	0	0	18486	0	0	25216	0	0	119950	0	0	33940	0	0	6306	0	0	30448	0	11_75277744_C_T	11	75277744	rs571009837	C	C	T	SNV
11_75277875_A_C	11	75277875	rs112083274	A	C	E G	PASS	PASS	p.Ile161Leu	p.Ile161Leu	c.481A>C	missense		34	274736	0	0.0001238	10	23928	0	0	10118	0	0	18806	0	0	25230	0	13	125080	0	9	34394	0	2	6428	0	0	30752	0	11_75277875_A_C	11	75277875	rs112083274	A	A	C	SNV
11_75277983_G_C	11	75277983	rs766872022	G	C	E	PASS	NA	p.Gly197Arg	p.Gly197Arg	c.589G>C	missense		1	234234	0	0.004269	0	14670	0	0	9730	0	1	17016	0	0	14694	0	0	108754	0	0	33428	0	0	5364	0	0	30578	0	11_75277983_G_C	11	75277983	rs766872022	G	G	C	SNV
11_75280001_G_A	11	75280001	rs753734711	G	A	E G	PASS	PASS	p.Asp247Asn	p.Asp247Asn	c.739G>A	missense		6	276958	0	0.02166	0	24016	0	0	10148	0	0	18870	0	0	25576	0	5	126678	0	0	34420	0	1	6468	0	0	30782	0	11_75280001_G_A	11	75280001	rs753734711	G	G	A	SNV
11_75280007_G_C	11	75280007	.	G	C	E	PASS	NA	p.Glu249Gln	p.Glu249Gln	c.745G>C	missense		1	246084	0	0.004064	0	15302	0	0	9850	0	0	17248	0	0	22132	0	0	111702	0	1	33582	0	0	5486	0	0	30782	0	11_75280007_G_C	11	75280007	.	G	G	C	SNV
11_75280138_C_G	11	75280138	rs771012011	C	G	E	PASS	NA	p.Ile292Met	p.Ile292Met	c.876C>G	missense		1	246134	0	0.004063	0	15292	0	0	9846	0	0	17238	0	0	22288	0	0	111628	0	1	33580	0	0	5482	0	0	30780	0	11_75280138_C_G	11	75280138	rs771012011	C	C	G	SNV
11_75279869_G_A	11	75279869	rs750157727	G	A	E G	PASS	PASS	p.Arg239Gln	p.Arg239Gln	c.716G>A	missense		5	277158	0	0.01804	0	24018	0	0	10150	0	4	18870	0	0	25782	0	1	126672	0	0	34420	0	0	6464	0	0	30782	0	11_75279869_G_A	11	75279869	rs750157727	G	G	A	SNV
11_75280169_G_A	11	75280169	rs751052033	G	A	E	PASS	NA	p.Ala303Thr	p.Ala303Thr	c.907G>A	missense		1	245158	0	0.004079	0	15198	0	0	9826	0	0	17172	0	0	22218	0	1	111074	0	0	33516	0	0	5462	0	0	30692	0	11_75280169_G_A	11	75280169	rs751052033	G	G	A	SNV
11_75279814_A_G	11	75279814	rs778537327	A	G	E	PASS	NA	p.Asn221Asp	p.Asn221Asp	c.661A>G	missense		1	246260	0	0.004061	0	15304	0	0	9850	0	1	17248	0	0	22296	0	0	111712	0	0	33582	0	0	5486	0	0	30782	0	11_75279814_A_G	11	75279814	rs778537327	A	A	G	SNV
11_75277432_T_A	11	75277432	rs767726256	T	A	E	PASS	NA	p.Leu13Gln	p.Leu13Gln	c.38T>A	missense		1	232354	0	0.004304	0	13278	0	0	9474	0	0	16788	0	0	21080	0	1	103544	0	0	32972	0	0	5210	0	0	30008	0	11_75277432_T_A	11	75277432	rs767726256	T	T	A	SNV
11_75277769_C_G	11	75277769	rs772088561	C	G	E	PASS	NA	p.Asn125Lys	p.Asn125Lys	c.375C>G	missense		1	241234	0	0.004145	0	14830	0	0	9736	0	0	17110	0	0	22182	0	1	107802	0	0	33480	0	0	5418	0	0	30676	0	11_75277769_C_G	11	75277769	rs772088561	C	C	G	SNV
11_75280097_G_C	11	75280097	rs758458147	G	C	E	PASS	NA	p.Glu279Gln	p.Glu279Gln	c.835G>C	missense		18	246256	1	0.07309	0	15302	0	0	9850	0	0	17248	0	0	22294	0	0	111712	0	2	33582	0	0	5486	0	16	30782	1	11_75280097_G_C	11	75280097	rs758458147	G	G	C	SNV
11_75283064_G_T	11	75283064	rs765402376	G	T	E	PASS	NA	p.Gly398Val	p.Gly398Val	c.1193G>T	missense		1	245912	0	0.004066	0	15268	0	0	9834	0	0	17240	0	0	22246	0	1	111498	0	0	33576	0	0	5474	0	0	30776	0	11_75283064_G_T	11	75283064	rs765402376	G	G	T	SNV
11_75277567_T_C	11	75277567	rs764918894	T	C	E	PASS	NA	p.Met58Thr	p.Met58Thr	c.173T>C	missense		2	241948	0	0.008266	0	14948	0	0	9766	0	0	17110	0	0	21594	0	0	109060	0	2	33430	0	0	5412	0	0	30628	0	11_75277567_T_C	11	75277567	rs764918894	T	T	C	SNV
11_75277572_A_G	11	75277572	rs752594307	A	G	E	PASS	NA	p.Lys60Glu	p.Lys60Glu	c.178A>G	missense		2	241944	0	0.008266	0	14976	0	0	9780	0	0	17112	0	0	21564	0	2	109014	0	0	33450	0	0	5416	0	0	30632	0	11_75277572_A_G	11	75277572	rs752594307	A	A	G	SNV
11_75277827_G_A	11	75277827	.	G	A	E	PASS	NA	p.Asp145Asn	p.Asp145Asn	c.433G>A	missense		1	243344	0	0.004109	0	15138	0	0	9806	0	0	17190	0	0	22236	0	1	109220	0	0	33540	0	0	5464	0	0	30750	0	11_75277827_G_A	11	75277827	.	G	G	A	SNV
11_75280036_G_A	11	75280036	.	G	A	E	PASS	NA	p.Met258Ile	p.Met258Ile	c.774G>A	missense		3	246190	0	0.01219	0	15304	0	0	9850	0	0	17248	0	0	22232	0	1	111706	0	1	33582	0	0	5486	0	1	30782	0	11_75280036_G_A	11	75280036	.	G	G	A	SNV
11_75282991_G_A	11	75282991	rs768025277	G	A	E	PASS	NA	p.Glu374Lys	p.Glu374Lys	c.1120G>A	missense		5	246030	0	0.02032	2	15288	0	0	9844	0	0	17244	0	0	22266	0	0	111542	0	0	33578	0	0	5486	0	3	30782	0	11_75282991_G_A	11	75282991	rs768025277	G	G	A	SNV
11_75277713_G_A	11	75277713	rs745963767	G	A	E	PASS	NA	p.Val107Met	p.Val107Met	c.319G>A	missense		12	229582	1	0.05227	0	13648	0	0	9494	0	0	16484	0	0	20648	0	0	101504	0	0	32590	0	0	5190	0	12	30024	1	11_75277713_G_A	11	75277713	rs745963767	G	G	A	SNV
11_75282948_G_C	11	75282948	rs771997683	G	C	E	PASS	NA	p.Leu359Phe	p.Leu359Phe	c.1077G>C	missense		1	246126	0	0.004063	0	15282	0	0	9844	0	0	17244	0	0	22290	0	1	111620	0	0	33580	0	0	5484	0	0	30782	0	11_75282948_G_C	11	75282948	rs771997683	G	G	C	SNV
11_75277829_C_A	11	75277829	rs756623619	C	A	E	PASS	NA	p.Asp145Glu	p.Asp145Glu	c.435C>A	missense		1	243410	0	0.004108	0	15146	0	0	9808	0	0	17190	0	0	22240	0	0	109272	0	0	33542	0	0	5462	0	1	30750	0	11_75277829_C_A	11	75277829	rs756623619	C	C	A	SNV
11_75280124_G_A	11	75280124	rs369751579	G	A	E	PASS	NA	p.Glu288Lys	p.Glu288Lys	c.862G>A	missense		4	246214	0	0.01625	0	15304	0	0	9848	0	0	17240	0	0	22294	0	0	111680	0	0	33582	0	0	5486	0	4	30780	0	11_75280124_G_A	11	75280124	rs369751579	G	G	A	SNV
11_75282835_G_A	11	75282835	rs781326376	G	A	E	PASS	NA	p.Ala322Thr	p.Ala322Thr	c.964G>A	missense		1	244952	0	0.004082	0	15178	0	0	9830	0	0	17210	0	1	22066	0	0	110856	0	0	33570	0	0	5468	0	0	30774	0	11_75282835_G_A	11	75282835	rs781326376	G	G	A	SNV
11_75277965_G_A	11	75277965	.	G	A	E	PASS	NA	p.Asp191Asn	p.Asp191Asn	c.571G>A	missense		2	237026	0	0.008438	1	14836	0	0	9774	0	0	17062	0	0	16246	0	0	109582	0	1	33476	0	0	5404	0	0	30646	0	11_75277965_G_A	11	75277965	.	G	G	A	SNV
11_75277863_G_C	11	75277863	.	G	C	E	PASS	NA	p.Glu157Gln	p.Glu157Gln	c.469G>C	missense		1	243646	0	0.004104	0	15200	0	0	9812	0	0	17180	0	0	21880	0	0	109820	0	0	33554	0	0	5448	0	1	30752	0	11_75277863_G_C	11	75277863	.	G	G	C	SNV
11_75280085_G_A	11	75280085	rs199679249	G	A	E G	PASS	PASS	p.Val275Met	p.Val275Met	c.823G>A	missense		13	277226	0	0.04689	1	24028	0	0	10152	0	0	18870	0	0	25788	0	7	126718	0	5	34420	0	0	6468	0	0	30782	0	11_75280085_G_A	11	75280085	rs199679249	G	G	A	SNV
11_75280085_G_T	11	75280085	rs199679249	G	T	E	PASS	NA	p.Val275Leu	p.Val275Leu	c.823G>T	missense		1	246264	0	0.004061	0	15304	0	0	9850	0	1	17248	0	0	22296	0	0	111716	0	0	33582	0	0	5486	0	0	30782	0	11_75280085_G_T	11	75280085	rs199679249	G	G	T	SNV
11_75280033_G_C	11	75280033	.	G	C	E	PASS	NA	p.Glu257Asp	p.Glu257Asp	c.771G>C	missense		3	246196	0	0.01219	0	15304	0	0	9850	0	0	17248	0	0	22236	0	3	111708	0	0	33582	0	0	5486	0	0	30782	0	11_75280033_G_C	11	75280033	.	G	G	C	SNV
11_75282968_T_C	11	75282968	rs747009311	T	C	E	PASS	NA	p.Phe366Ser	p.Phe366Ser	c.1097T>C	missense		1	246114	0	0.004063	0	15290	0	0	9844	0	0	17240	0	0	22288	0	1	111608	0	0	33578	0	0	5484	0	0	30782	0	11_75282968_T_C	11	75282968	rs747009311	T	T	C	SNV
11_75277452_G_A	11	75277452	rs200397594	G	A	E G	RF	PASS	p.Glu20Lys	p.Glu20Lys	c.58G>A	missense		1	30968	0	0.03229	0	8732	0	0	302	0	1	1622	0	0	3492	0	0	15000	0	0	838	0	0	982	0	0	0	0	11_75277452_G_A	11	75277452	rs200397594	G	G	A	SNV
11_75277423_T_C	11	75277423	rs757293522	T	C	E	PASS	NA	p.Phe10Ser	p.Phe10Ser	c.29T>C	missense		4	232988	0	0.01717	0	13388	0	0	9506	0	0	16808	0	0	21132	0	0	104032	0	0	32976	0	0	5236	0	4	29910	0	11_75277423_T_C	11	75277423	rs757293522	T	T	C	SNV
11_75280004_G_A	11	75280004	rs765236669	G	A	E	PASS	NA	p.Asp248Asn	p.Asp248Asn	c.742G>A	missense		5	246050	0	0.02032	1	15302	0	0	9848	0	3	17248	0	0	22104	0	1	111700	0	0	33582	0	0	5484	0	0	30782	0	11_75280004_G_A	11	75280004	rs765236669	G	G	A	SNV
11_75277974_C_A	11	75277974	rs141721173	C	A	E G	PASS	PASS	p.Arg194Ser	p.Arg194Ser	c.580C>A	missense		217	266688	0	0.0008137	16	23506	0	3	10058	0	0	18654	0	16	19000	0	152	124192	0	26	34288	0	3	6368	0	1	30622	0	11_75277974_C_A	11	75277974	rs141721173	C	C	A	SNV
11_75277498_A_T	11	75277498	rs752546581	A	T	E	PASS	NA	p.Lys35Met	p.Lys35Met	c.104A>T	missense		2	240640	0	0.008311	2	14540	0	0	9714	0	0	17036	0	0	21496	0	0	108480	0	0	33408	0	0	5390	0	0	30576	0	11_75277498_A_T	11	75277498	rs752546581	A	A	T	SNV
11_75280059_G_C	11	75280059	rs772119590	G	C	E	PASS	NA	p.Ser266Thr	p.Ser266Thr	c.797G>C	missense		1	246240	0	0.004061	0	15304	0	0	9850	0	0	17248	0	0	22276	0	1	111712	0	0	33582	0	0	5486	0	0	30782	0	11_75280059_G_C	11	75280059	rs772119590	G	G	C	SNV
11_75282920_G_C	11	75282920	rs150431930	G	C	E G	PASS	PASS	p.Ser350Thr	p.Ser350Thr	c.1049G>C	missense		9	277100	0	0.03248	0	24018	0	0	10148	0	0	18862	0	0	25794	0	9	126614	0	0	34416	0	0	6466	0	0	30782	0	11_75282920_G_C	11	75282920	rs150431930	G	G	C	SNV
11_75282937_G_A	11	75282937	rs747912977	G	A	E	PASS	NA	p.Ala356Thr	p.Ala356Thr	c.1066G>A	missense		4	246114	0	0.01625	0	15292	0	0	9842	0	0	17238	0	0	22290	0	4	111608	0	0	33578	0	0	5484	0	0	30782	0	11_75282937_G_A	11	75282937	rs747912977	G	G	A	SNV
11_75280013_G_A	11	75280013	rs553118941	G	A	E G	PASS	PASS	p.Glu251Lys	p.Glu251Lys	c.751G>A	missense		3	277048	0	0.01083	2	24018	0	0	10150	0	1	18870	0	0	25662	0	0	126678	0	0	34420	0	0	6468	0	0	30782	0	11_75280013_G_A	11	75280013	rs553118941	G	G	A	SNV
11_75277465_C_G	11	75277465	.	C	G	G	NA	PASS	p.Pro24Arg	p.Pro24Arg	c.71C>G	missense		1	30964	0	3.23e-5	0	8732	0	0	302	0	0	1622	0	0	3490	0	1	14998	0	0	838	0	0	982	0	0	0	0	11_75277465_C_G	11	75277465	.	C	C	G	SNV
11_75277593_A_G	11	75277593	rs780947787	A	G	E	PASS	NA	p.Ile67Val	p.Ile67Val	c.199A>G	missense		1	241306	0	0.004144	0	14946	0	0	9794	0	0	17104	0	0	21362	0	1	108652	0	0	33412	0	0	5416	0	0	30620	0	11_75277593_A_G	11	75277593	rs780947787	A	A	G	SNV
11_75280043_G_A	11	75280043	rs748697715	G	A	E G	PASS	PASS	p.Ala261Thr	p.Ala261Thr	c.781G>A	missense		4	277154	0	0.01443	0	24030	0	0	10152	0	0	18870	0	0	25736	0	0	126698	0	4	34420	0	0	6466	0	0	30782	0	11_75280043_G_A	11	75280043	rs748697715	G	G	A	SNV
11_75277519_C_A	11	75277519	rs781002791	C	A	E	PASS	NA	p.Thr42Lys	p.Thr42Lys	c.125C>A	missense		3	241098	0	0.01244	0	14674	0	0	9730	0	0	17060	0	0	21560	0	0	108710	0	0	33398	0	0	5384	0	3	30582	0	11_75277519_C_A	11	75277519	rs781002791	C	C	A	SNV
11_75277582_C_T	11	75277582	rs576480194	C	T	E G	PASS	PASS	p.Ala63Val	p.Ala63Val	c.188C>T	missense		109	272336	1	0.0004002	0	23666	0	0	10080	0	95	18728	1	0	24886	0	1	123702	0	0	34258	0	1	6396	0	12	30620	0	11_75277582_C_T	11	75277582	rs576480194	C	C	T	SNV
11_75277926_G_A	11	75277926	rs753922805	G	A	E G	RF	PASS	p.Ala178Thr	p.Ala178Thr	c.532G>A	missense		1	30962	0	3.23e-5	1	8716	0	0	302	0	0	1622	0	0	3494	0	0	15008	0	0	838	0	0	982	0	0	0	0	11_75277926_G_A	11	75277926	rs753922805	G	G	A	SNV
11_75277755_T_G	11	75277755	rs781727997	T	G	E	PASS	NA	p.Ser121Ala	p.Ser121Ala	c.361T>G	missense		3	238990	0	0.01255	0	14494	0	0	9662	0	0	17036	0	0	21990	0	0	106548	0	0	33332	0	0	5368	0	3	30560	0	11_75277755_T_G	11	75277755	rs781727997	T	T	G	SNV
11_75280007_G_A	11	75280007	.	G	A	E	PASS	NA	p.Glu249Lys	p.Glu249Lys	c.745G>A	missense		1	246084	0	0.004064	1	15302	0	0	9850	0	0	17248	0	0	22132	0	0	111702	0	0	33582	0	0	5486	0	0	30782	0	11_75280007_G_A	11	75280007	.	G	G	A	SNV
11_75280022_C_G	11	75280022	rs757027235	C	G	E	PASS	NA	p.Gln254Glu	p.Gln254Glu	c.760C>G	missense		2	246168	0	0.008125	0	15304	0	0	9850	0	0	17248	0	0	22210	0	2	111706	0	0	33582	0	0	5486	0	0	30782	0	11_75280022_C_G	11	75280022	rs757027235	C	C	G	SNV
11_75280144_G_A	11	75280144	rs759715144	G	A	E	PASS	NA	p.Met294Ile	p.Met294Ile	c.882G>A	missense		1	246060	0	0.004064	0	15294	0	0	9846	0	0	17236	0	0	22286	0	1	111558	0	0	33580	0	0	5482	0	0	30778	0	11_75280144_G_A	11	75280144	rs759715144	G	G	A	SNV
11_75282994_G_A	11	75282994	rs577035420	G	A	E	PASS	NA	p.Glu375Lys	p.Glu375Lys	c.1123G>A	missense		1	246030	0	0.004065	0	15288	0	0	9844	0	0	17244	0	0	22266	0	0	111544	0	0	33578	0	0	5486	0	1	30780	0	11_75282994_G_A	11	75282994	rs577035420	G	G	A	SNV
11_75280121_A_G	11	75280121	.	A	G	E	PASS	NA	p.Lys287Glu	p.Lys287Glu	c.859A>G	missense		1	246236	0	0.004061	1	15302	0	0	9850	0	0	17242	0	0	22298	0	0	111694	0	0	33582	0	0	5486	0	0	30782	0	11_75280121_A_G	11	75280121	.	A	A	G	SNV
11_75279826_A_G	11	75279826	.	A	G	E	PASS	NA	p.Met225Val	p.Met225Val	c.673A>G	missense		1	246264	0	0.004061	0	15304	0	0	9850	0	0	17248	0	0	22296	0	1	111716	0	0	33582	0	0	5486	0	0	30782	0	11_75279826_A_G	11	75279826	.	A	A	G	SNV
11_75283079_T_C	11	75283079	rs201566218	T	C	E G	PASS	PASS	p.Ile403Thr	p.Ile403Thr	c.1208T>C	missense		24	276850	0	0.08669	0	23976	0	0	10144	0	2	18858	0	0	25754	0	10	126472	0	5	34414	0	0	6456	0	7	30776	0	11_75283079_T_C	11	75283079	rs201566218	T	T	C	SNV
11_75277434_G_A	11	75277434	rs750583954	G	A	E G	PASS	PASS	p.Glu14Lys	p.Glu14Lys	c.40G>A	missense		2	263162	0	7.6e-6	0	21984	0	0	9764	0	2	18402	0	0	24538	0	0	118470	0	0	33810	0	0	6186	0	0	30008	0	11_75277434_G_A	11	75277434	rs750583954	G	G	A	SNV
11_75277692_G_A	11	75277692	rs749665611	G	A	E G	PASS	PASS	p.Glu100Lys	p.Glu100Lys	c.298G>A	missense		33	262122	0	0.0001259	0	22732	0	0	9804	0	0	18300	0	1	23568	0	20	117776	0	11	33652	0	1	6198	0	0	30092	0	11_75277692_G_A	11	75277692	rs749665611	G	G	A	SNV
11_75277720_C_G	11	75277720	rs148959638	C	G	E G	PASS	PASS	p.Ala109Gly	p.Ala109Gly	c.326C>G	missense		8	260592	0	3.07e-5	7	22342	0	0	9776	0	1	18078	0	0	24394	0	0	116366	0	0	33398	0	0	6164	0	0	30074	0	11_75277720_C_G	11	75277720	rs148959638	C	C	G	SNV
11_75277761_G_T	11	75277761	rs749500041	G	T	E	PASS	NA	p.Ala123Ser	p.Ala123Ser	c.367G>T	missense		4	239722	0	0.01669	0	14612	0	0	9702	0	0	17082	0	0	22060	0	4	106866	0	0	33402	0	0	5380	0	0	30618	0	11_75277761_G_T	11	75277761	rs749500041	G	G	T	SNV
11_75277449_G_A	11	75277449	rs778730843	G	A	E G	PASS	PASS	p.Ala19Thr	p.Ala19Thr	c.55G>A	missense		4	263280	0	0.01519	0	22010	0	0	9818	0	0	18380	0	0	24468	0	1	118420	0	3	33868	0	0	6186	0	0	30130	0	11_75277449_G_A	11	75277449	rs778730843	G	G	A	SNV
11_75283042_C_G	11	75283042	.	C	G	E	PASS	NA	p.Leu391Val	p.Leu391Val	c.1171C>G	missense		1	246002	0	0.004065	0	15280	0	0	9844	0	0	17236	0	0	22262	0	0	111542	0	0	33578	0	0	5486	0	1	30774	0	11_75283042_C_G	11	75283042	.	C	C	G	SNV
11_75279993_A_C	11	75279993	rs773393677	A	C	E	PASS	NA	p.Asn244Thr	p.Asn244Thr	c.731A>C	missense		1	246028	0	0.004065	0	15304	0	0	9850	0	0	17248	0	0	22088	0	1	111690	0	0	33582	0	0	5484	0	0	30782	0	11_75279993_A_C	11	75279993	rs773393677	A	A	C	SNV
11_75283078_A_G	11	75283078	rs758706956	A	G	E	PASS	NA	p.Ile403Val	p.Ile403Val	c.1207A>G	missense		7	245940	0	0.02846	0	15260	0	0	9844	0	0	17238	0	0	22266	0	0	111498	0	0	33578	0	0	5478	0	7	30778	0	11_75283078_A_G	11	75283078	rs758706956	A	A	G	SNV
11_75279858_G_T	11	75279858	rs764058290	G	T	E	PASS	NA	p.Met235Ile	p.Met235Ile	c.705G>T	missense		1	246262	0	0.004061	0	15304	0	0	9850	0	0	17248	0	0	22298	0	1	111712	0	0	33582	0	0	5486	0	0	30782	0	11_75279858_G_T	11	75279858	rs764058290	G	G	T	SNV
11_75277846_A_G	11	75277846	rs749386696	A	G	E	PASS	NA	p.Lys151Arg	p.Lys151Arg	c.452A>G	missense		1	243656	0	0.004104	0	15184	0	0	9802	0	0	17190	0	0	22136	0	1	109570	0	0	33558	0	0	5458	0	0	30758	0	11_75277846_A_G	11	75277846	rs749386696	A	A	G	SNV
11_75283036_A_G	11	75283036	rs775032765	A	G	E	PASS	NA	p.Ile389Val	p.Ile389Val	c.1165A>G	missense		1	246026	0	0.004065	0	15278	0	0	9844	0	0	17240	0	0	22256	0	1	111566	0	0	33576	0	0	5486	0	0	30780	0	11_75283036_A_G	11	75283036	rs775032765	A	A	G	SNV
11_75282993_G_C	11	75282993	rs750860974	G	C	E	PASS	NA	p.Glu374Asp	p.Glu374Asp	c.1122G>C	missense		1	246044	0	0.004064	0	15290	0	0	9844	0	0	17240	0	0	22276	0	0	111550	0	0	33580	0	0	5484	0	1	30780	0	11_75282993_G_C	11	75282993	rs750860974	G	G	C	SNV
11_75277740_C_A	11	75277740	rs200265134	C	A	E G	PASS	PASS	p.Arg116Ser	p.Arg116Ser	c.346C>A	missense		67	265040	0	0.0002528	0	22696	0	0	9842	0	0	18402	0	31	25020	0	29	118700	0	0	33780	0	7	6270	0	0	30330	0	11_75277740_C_A	11	75277740	rs200265134	C	C	A	SNV
11_75277581_G_A	11	75277581	rs758261919	G	A	E	PASS	NA	p.Ala63Thr	p.Ala63Thr	c.187G>A	missense		1	241606	0	0.004139	0	14960	0	0	9782	0	0	17118	0	0	21476	0	1	108798	0	0	33430	0	0	5420	0	0	30622	0	11_75277581_G_A	11	75277581	rs758261919	G	G	A	SNV
11_75282889_A_G	11	75282889	.	A	G	E	PASS	NA	p.Met340Val	p.Met340Val	c.1018A>G	missense		1	246096	0	0.004063	0	15288	0	0	9844	0	0	17242	0	0	22298	0	0	111588	0	1	33572	0	0	5482	0	0	30782	0	11_75282889_A_G	11	75282889	.	A	A	G	SNV
11_75283054_A_G	11	75283054	.	A	G	E	PASS	NA	p.Thr395Ala	p.Thr395Ala	c.1183A>G	missense		1	245966	0	0.004066	0	15272	0	0	9842	0	0	17240	0	0	22256	0	1	111516	0	0	33578	0	0	5484	0	0	30778	0	11_75283054_A_G	11	75283054	.	A	A	G	SNV
11_75279858_G_C	11	75279858	rs764058290	G	C	E	PASS	NA	p.Met235Ile	p.Met235Ile	c.705G>C	missense		1	246262	0	0.004061	0	15304	0	0	9850	0	0	17248	0	0	22298	0	1	111712	0	0	33582	0	0	5486	0	0	30782	0	11_75279858_G_C	11	75279858	rs764058290	G	G	C	SNV
11_75283107_C_G	11	75283107	rs200334001	C	G	E G	PASS	PASS	p.Asp412Glu	p.Asp412Glu	c.1236C>G	missense		11	276718	0	0.03975	0	23956	0	0	10136	0	0	18858	0	0	25758	0	7	126374	0	2	34408	0	2	6448	0	0	30780	0	11_75283107_C_G	11	75283107	rs200334001	C	C	G	SNV
11_75277879_A_G	11	75277879	rs760648204	A	G	E	PASS	NA	p.Asn162Ser	p.Asn162Ser	c.485A>G	missense		3	243694	0	0.01231	0	15206	0	0	9812	0	0	17182	0	0	21576	0	1	110166	0	1	33552	0	0	5446	0	1	30754	0	11_75277879_A_G	11	75277879	rs760648204	A	A	G	SNV
11_75277849_A_G	11	75277849	rs768946201	A	G	E G	PASS	PASS	p.Gln152Arg	p.Gln152Arg	c.455A>G	missense		2	274742	0	7.28e-6	1	23926	0	0	10108	0	0	18808	0	0	25618	0	1	124694	0	0	34394	0	0	6438	0	0	30756	0	11_75277849_A_G	11	75277849	rs768946201	A	A	G	SNV
11_75277687_G_A	11	75277687	rs541595707	G	A	E G	PASS	PASS	p.Ser98Asn	p.Ser98Asn	c.293G>A	missense		57	262660	0	0.0002170	0	22810	0	0	9820	0	0	18338	0	0	23304	0	0	118268	0	0	33756	0	1	6206	0	56	30158	0	11_75277687_G_A	11	75277687	rs541595707	G	G	A	SNV
11_75277585_T_C	11	75277585	.	T	C	E	PASS	NA	p.Val64Ala	p.Val64Ala	c.191T>C	missense		1	241546	0	4.14e-6	0	14962	0	0	9782	0	1	17106	0	0	21458	0	0	108772	0	0	33428	0	0	5420	0	0	30618	0	11_75277585_T_C	11	75277585	.	T	T	C	SNV
11_75282891_G_A	11	75282891	rs201416803	G	A	E G	PASS	PASS	p.Met340Ile	p.Met340Ile	c.1020G>A	missense		8	277050	0	0.02888	3	24014	0	0	10150	0	0	18860	0	0	25790	0	5	126574	0	0	34414	0	0	6466	0	0	30782	0	11_75282891_G_A	11	75282891	rs201416803	G	G	A	SNV
11_75277753_A_G	11	75277753	rs757694413	A	G	E G	PASS	PASS	p.Asn120Ser	p.Asn120Ser	c.359A>G	missense		12	269478	0	0.04453	0	23172	0	0	9962	0	0	18630	0	0	25436	0	0	121268	0	12	34118	0	0	6342	0	0	30550	0	11_75277753_A_G	11	75277753	rs757694413	A	A	G	SNV
11_75280121_A_C	11	75280121	.	A	C	E	PASS	NA	p.Lys287Gln	p.Lys287Gln	c.859A>C	missense		1	246236	0	0.004061	0	15302	0	0	9850	0	0	17242	0	0	22298	0	1	111694	0	0	33582	0	0	5486	0	0	30782	0	11_75280121_A_C	11	75280121	.	A	A	C	SNV
11_75277492_C_T	11	75277492	rs754791521	C	T	E	PASS	NA	p.Ala33Val	p.Ala33Val	c.98C>T	missense		7	239738	0	2.92e-5	0	14408	0	0	9696	0	7	17020	0	0	21412	0	0	107978	0	0	33344	0	0	5352	0	0	30528	0	11_75277492_C_T	11	75277492	rs754791521	C	C	T	SNV
11_75277973_G_C	11	75277973	rs559687602	G	C	E G	PASS	PASS	p.Glu193Asp	p.Glu193Asp	c.579G>C	missense		17	266718	0	0.06374	12	23488	0	3	10062	0	0	18656	0	0	19022	0	0	124212	0	1	34286	0	0	6370	0	1	30622	0	11_75277973_G_C	11	75277973	rs559687602	G	G	C	SNV
11_75282839_G_A	11	75282839	rs144791057	G	A	E	PASS	NA	p.Gly323Glu	p.Gly323Glu	c.968G>A	missense		21	245164	0	0.08566	0	15196	0	0	9832	0	0	17208	0	8	22140	0	12	110968	0	0	33572	0	1	5470	0	0	30778	0	11_75282839_G_A	11	75282839	rs144791057	G	G	A	SNV
11_75277858_A_G	11	75277858	rs747915459	A	G	E G	PASS	PASS	p.Asn155Ser	p.Asn155Ser	c.464A>G	missense		8	274704	0	0.02912	0	23922	0	1	10116	0	0	18804	0	0	25482	0	7	124794	0	0	34392	0	0	6440	0	0	30754	0	11_75277858_A_G	11	75277858	rs747915459	A	A	G	SNV
11_75277959_A_G	11	75277959	rs138784081	A	G	E G	PASS	PASS	p.Thr189Ala	p.Thr189Ala	c.565A>G	missense		32	269018	0	0.0001190	24	23646	0	0	10094	0	0	18712	0	0	20372	0	0	124796	0	7	34336	0	1	6384	0	0	30678	0	11_75277959_A_G	11	75277959	rs138784081	A	A	G	SNV
11_75279993_A_G	11	75279993	rs773393677	A	G	E	PASS	NA	p.Asn244Ser	p.Asn244Ser	c.731A>G	missense		4	246028	0	0.01626	0	15304	0	0	9850	0	0	17248	0	0	22088	0	4	111690	0	0	33582	0	0	5484	0	0	30782	0	11_75279993_A_G	11	75279993	rs773393677	A	A	G	SNV
11_75283063_G_A	11	75283063	.	G	A	E	PASS	NA	p.Gly398Ser	p.Gly398Ser	c.1192G>A	missense		3	245934	0	1.22e-5	0	15266	0	0	9838	0	1	17240	0	0	22258	0	0	111504	0	0	33576	0	0	5478	0	2	30774	0	11_75283063_G_A	11	75283063	.	G	G	A	SNV
11_75277434_G_C	11	75277434	rs750583954	G	C	E	PASS	NA	p.Glu14Gln	p.Glu14Gln	c.40G>C	missense		1	232196	0	0.004307	0	13248	0	0	9462	0	1	16780	0	0	21046	0	0	103474	0	0	32972	0	0	5206	0	0	30008	0	11_75277434_G_C	11	75277434	rs750583954	G	G	C	SNV
11_75277967_C_A	11	75277967	rs745340617	C	A	E G	PASS	PASS	p.Asp191Glu	p.Asp191Glu	c.573C>A	missense		14	267872	0	0.05226	0	23566	0	0	10072	0	0	18684	0	0	19656	0	6	124558	0	0	34310	0	0	6380	0	8	30646	0	11_75277967_C_A	11	75277967	rs745340617	C	C	A	SNV
11_75277480_C_G	11	75277480	rs774738608	C	G	E	PASS	NA	p.Ala29Gly	p.Ala29Gly	c.86C>G	missense		2	238838	0	0.008374	0	14268	0	0	9666	0	0	17012	0	0	21392	0	0	107324	0	0	33340	0	0	5332	0	2	30504	0	11_75277480_C_G	11	75277480	rs774738608	C	C	G	SNV
11_75277480_C_T	11	75277480	rs774738608	C	T	E	PASS	NA	p.Ala29Val	p.Ala29Val	c.86C>T	missense		6	238838	0	0.02512	0	14268	0	1	9666	0	4	17012	0	0	21392	0	0	107324	0	1	33340	0	0	5332	0	0	30504	0	11_75277480_C_T	11	75277480	rs774738608	C	C	T	SNV
11_75277561_A_G	11	75277561	rs553519612	A	G	E G	PASS	PASS	p.Gln56Arg	p.Gln56Arg	c.167A>G	missense		13	272916	0	0.04763	0	23662	0	0	10064	0	13	18736	0	0	25102	0	0	124082	0	0	34272	0	0	6388	0	0	30610	0	11_75277561_A_G	11	75277561	rs553519612	A	A	G	SNV
11_75277694_G_C	11	75277694	.	G	C	G	NA	PASS	p.Glu100Asp	p.Glu100Asp	c.300G>C	missense		1	30930	0	0.03233	0	8708	0	0	302	0	0	1620	0	1	3494	0	0	14986	0	0	838	0	0	982	0	0	0	0	11_75277694_G_C	11	75277694	.	G	G	C	SNV
11_75277552_G_A	11	75277552	rs773211240	G	A	E	PASS	NA	p.Ser53Asn	p.Ser53Asn	c.158G>A	missense		1	241898	0	0.004134	0	14928	0	0	9764	0	0	17104	0	0	21584	0	1	109086	0	0	33414	0	0	5402	0	0	30616	0	11_75277552_G_A	11	75277552	rs773211240	G	G	A	SNV
11_75277468_C_T	11	75277468	.	C	T	E	PASS	NA	p.Ala25Val	p.Ala25Val	c.74C>T	missense		1	236244	0	0.004233	0	13834	0	0	9604	0	0	16908	0	0	21166	0	1	105818	0	0	33250	0	0	5270	0	0	30394	0	11_75277468_C_T	11	75277468	.	C	C	T	SNV
11_75277489_C_G	11	75277489	.	C	G	G	NA	PASS	p.Thr32Ser	p.Thr32Ser	c.95C>G	missense		1	30964	0	3.23e-5	0	8724	0	0	302	0	0	1622	0	0	3494	0	1	15002	0	0	838	0	0	982	0	0	0	0	11_75277489_C_G	11	75277489	.	C	C	G	SNV
11_75282957_T_A	11	75282957	.	T	A	G	NA	PASS	p.Asp362Glu	p.Asp362Glu	c.1086T>A	missense		1	30946	0	0.03231	0	8722	0	0	302	0	0	1622	0	0	3494	0	1	14986	0	0	838	0	0	982	0	0	0	0	11_75282957_T_A	11	75282957	.	T	T	A	SNV
11_75277486_G_C	11	75277486	rs140588417	G	C	E G	PASS	PASS	p.Gly31Ala	p.Gly31Ala	c.92G>C	missense		398	270090	4	0.001474	2	23038	0	325	9984	4	0	18618	0	0	24878	0	43	122576	0	10	34180	0	18	6324	0	0	30492	0	11_75277486_G_C	11	75277486	rs140588417	G	G	C	SNV
11_75277491_G_T	11	75277491	rs150061926	G	T	E	PASS	NA	p.Ala33Ser	p.Ala33Ser	c.97G>T	missense		7	239826	0	0.02919	0	14422	0	0	9698	0	7	17028	0	0	21454	0	0	107986	0	0	33352	0	0	5358	0	0	30528	0	11_75277491_G_T	11	75277491	rs150061926	G	G	T	SNV
[truncated: 92 more columns]

## Sheet: Sheet2
Consequence	Grantham	PolyPhenVal	SIFTval	PHRED	PolyPhenCat	SIFTcat
Cys156Trp	215	0.852	0.03	24.4	possibly_damaging	deleterious
Arg103Cys	180	0.802	0.02	34	possibly_damaging	deleterious
Arg116Cys	180	0.478	0.03	31	possibly_damaging	deleterious
Arg280Cys	180	0.977	0	34	probably_damaging	deleterious
Arg339Cys	180	0.816	0.01	32	possibly_damaging	deleterious
Arg377Cys	180	0.916	0.02	34	probably_damaging	deleterious
Arg405Cys	180	0.975	0	34	probably_damaging	deleterious
Ser76Trp	177	1	0	28.6	probably_damaging	deleterious
Ser159Phe	155	0.972	0.01	28.4	probably_damaging	deleterious
Ser399Phe	155	0.999	0	29.9	probably_damaging	deleterious
Ser76Leu	145	0.998	0	31	probably_damaging	deleterious
Ser91Leu	145	0.586	0.01	29.6	possibly_damaging	deleterious
Ser139Leu	145	0.765	0.01	27.9	possibly_damaging	deleterious
Ser399Tyr	144	0.999	0	29.0	probably_damaging	deleterious
Asn221Tyr	143	0.941	0.03	28.2	probably_damaging	deleterious
Ala349Asp	126	0.697	0.01	32	possibly_damaging	deleterious
Gly136Arg	125	0.976	0	26.7	probably_damaging	deleterious
Gly183Arg	125	1	0	31	probably_damaging	deleterious
Arg415Gly	125	0.816	0.01	28.6	possibly_damaging	deleterious
Leu50Gln	113	0.973	0.01	27.4	probably_damaging	deleterious
Leu115Gln	113	0.998	0	26.4	probably_damaging	deleterious
Leu400Gln	113	0.913	0	28.6	probably_damaging	deleterious
Arg280Ser	110	0.85	0.02	33	possibly_damaging	deleterious
Val232Gly	109	0.981	0.01	29.1	probably_damaging	deleterious
Gly241Val	109	0.951	0.01	29.0	probably_damaging	deleterious
Glu276Ala	107	0.686	0.01	28.1	possibly_damaging	deleterious
Arg124Pro	103	0.999	0.03	29.7	probably_damaging	deleterious
Arg124Leu	102	0.999	0.03	31	probably_damaging	deleterious
Arg239Trp	101	0.977	0	35	probably_damaging	deleterious
Arg408Trp	101	0.979	0.01	34	probably_damaging	deleterious
Leu118Pro	98	0.908	0.01	24.3	possibly_damaging	deleterious
Leu134Pro	98	0.962	0	25.9	probably_damaging	deleterious
Leu253Pro	98	0.965	0.02	28.4	probably_damaging	deleterious
Pro259Leu	98	0.926	0.04	32	probably_damaging	deleterious
Asp144Gly	94	0.709	0.02	25.9	possibly_damaging	deleterious
Asn162Lys	94	0.812	0.02	28.0	possibly_damaging	deleterious
Asn174Lys	94	0.889	0.01	26.8	possibly_damaging	deleterious
Asn202Lys	94	0.934	0	26.3	probably_damaging	deleterious
Thr314Ile	89	0.494	0.03	28.2	possibly_damaging	deleterious
Ser70Pro	74	0.999	0	25.4	probably_damaging	deleterious
His153Asn	68	0.95	0.01	27.6	probably_damaging	deleterious
Val192Ala	64	0.489	0.01	25.2	possibly_damaging	deleterious
Ala384Thr	58	0.699	0.01	33	possibly_damaging	deleterious
Ser47Gly	56	0.747	0.02	24.6	possibly_damaging	deleterious
Gly183Ser	56	1	0.01	32	probably_damaging	deleterious
Glu276Lys	56	0.808	0.01	33	possibly_damaging	deleterious
Glu328Lys	56	0.881	0.01	34	possibly_damaging	deleterious
Glu417Lys	56	0.99	0	34	probably_damaging	deleterious
Phe205Val	50	0.912	0.03	26.4	probably_damaging	deleterious
Arg415Gln	43	0.754	0.03	32	possibly_damaging	deleterious
Pro259Thr	38	0.945	0.01	28.6	probably_damaging	deleterious
Leu260Val	32	0.999	0.04	25.6	probably_damaging	deleterious
Leu326Val	32	0.999	0.01	27.9	probably_damaging	deleterious
Arg222His	29	0.999	0.05	35	probably_damaging	deleterious
Arg280His	29	0.977	0.03	34	probably_damaging	deleterious
His353Arg	29	0.999	0	25.9	probably_damaging	deleterious
Pro71Ala	27	0.999	0	24.0	probably_damaging	deleterious
His153Gln	24	0.967	0.01	25.7	probably_damaging	deleterious
Asp412Asn	23	0.576	0.04	29.2	possibly_damaging	deleterious
Leu43Phe	22	0.855	0.03	23.4	possibly_damaging	deleterious
Leu54Phe	22	0.981	0	23.8	probably_damaging	deleterious
Phe142Leu	22	0.994	0.02	27.2	probably_damaging	deleterious
Phe142Leu	22	0.994	0.02	26.6	probably_damaging	deleterious
Phe352Tyr	22	0.726	0.02	27.3	possibly_damaging	deleterious
Val219Met	21	1	0.02	32	probably_damaging	deleterious
Val226Met	21	0.94	0	31	probably_damaging	deleterious
Met237Ile	10	0.828	0	32	possibly_damaging	deleterious
Asp416Glu	0	0.997	0	26.1	probably_damaging	deleterious

## Sheet: Sheet3
Mutations	Grantham	CADD score
Leu43Phe	22	23.4
Ser47Gly	56	24.6
Leu50Gln	113	27.4
Leu54Phe	22	23.8
Ser70Pro	74	25.4
Pro71Ala	27	24
Ser76Leu	145	31
Ser76Trp	177	28.6
Ser91Leu	145	29.6
Arg103Cys	180	34
Leu115Gln	113	26.4
Arg116Cys	180	31
Leu118Pro	98	24.3
Arg124Leu	102	31
Arg124Pro	103	29.7
Leu134Pro	98	25.9
Gly136Arg	125	26.7
Ser139Leu	145	27.9
Phe142Leu	22	27.2
Asp144Gly	94	25.9
His153Asn	68	27.6
His153Gln	24	25.7
Cys156Trp	215	24.4
Ser159Phe	155	28.4
Asn162Lys	94	28
Asn174Lys	94	26.8
Gly183Ser	56	32
Gly183Arg	125	31
Val192Ala	64	25.2
Asn202Lys	94	26.3
Phe205Val	50	26.4
Val219Met	21	32
Asn221Tyr	143	28.2
Arg222His	29	35
Val226Met	21	31
Val232Gly	109	29.1
Met237Ile	10	32
Arg239Trp	101	35
Gly241Val	109	29
Leu253Pro	98	28.4
Pro259Thr	38	28.6
Pro259Leu	98	32
Leu260Val	32	25.6
Glu276Lys	56	33
Glu276Ala	107	28.1
Arg280Cys	180	34
Arg280Ser	110	33
Arg280His	29	34
Thr314Ile	89	28.2
Leu326Val	32	27.9
Glu328Lys	56	34
Arg339Cys	180	32
Ala349Asp	126	32
Phe352Tyr	22	27.3
His353Arg	29	25.9
Arg377Cys	180	34
Ala384Thr	58	33
Ser399Phe	155	29.9
Ser399Tyr	144	29
Leu400Gln	113	28.6
Arg405Cys	180	34
Arg408Trp	101	34
Asp412Asn	23	29.2
Arg415Gly	125	28.6
Arg415Gln	43	32
Asp416Glu	0	26.1
Glu417Lys	56	34
