# Supplementary material for: Mutational Hotspots and Protein Interactome Analyses of Collagen-Specific Chaperone&mdash;HSP47
Source: Preprints.org preprint supplement (doi:10.20944/preprints201811.0280.v1), 2018-11-12
Supplement: Supplementary file 3 [file TableS3_HSP47_COSMIC.xlsx]

## Sheet: Sheet1
AA Mutation	CDS Mutation	Genomic Location	Sample Name	Sample ID	Primary Tissue	Tissue Subtype 1	Tissue Subtype 2	Histology	Histology Subtype 1	Histology Subtype 2	Pubmed Id	CGP Study	Somatic Status	Sample Type	Zygosity
p.R2C	c.4C>T	11:75566353..75566353	D-08	2312532	Stomach	NS	NS	Carcinoma	Diffuse adenocarcinoma	NS	24690483	-	Confirmed Somatic	Tumour Sample	Unknown
p.A16S	c.46G>T	11:75566395..75566395	NCI-H727	2433547	Lung	NS	NS	Carcinoid-endocrine tumour	NS	NS	26087898	-	Variant of unknown origin	Cultured	Unknown
p.A19T	c.55G>A	11:75566404..75566404	PDA_032	2367373	Pancreas	NS	NS	Carcinoma	Ductal carcinoma	NS	25855536	-	Confirmed Somatic	Unknown	Unknown
p.A33T	c.97G>A	11:75566446..75566446	Thyroid-CN-WZ041T	2635102	Thyroid	NS	NS	Carcinoma	NS	NS	-	676	Confirmed Somatic	Tumour Sample	Unknown
p.A33T	c.97G>A	11:75566446..75566446	W23T	2745051	Thyroid	NS	NS	Carcinoma	NS	NS	-	676	Confirmed Somatic	Tumour Sample	Unknown
p.E34E	c.102G>A	11:75566451..75566451	08-P1177	2294565	Bone	NS	NS	Ewings sarcoma-peripheral primitive neuroectodermal tumour	NS	NS	25186949	-	Variant of unknown origin	Unknown	Unknown
p.A40V	c.119C>T	11:75566468..75566468	T353622	2658798	Large intestine	NS	NS	Carcinoma	Adenocarcinoma	NS	27149842	-	Confirmed Somatic	Unknown	Unknown
p.T42T	c.126G>A	11:75566475..75566475	TCGA-AP-A0LT-01	1783357	Endometrium	NS	NS	Carcinoma	Endometrioid carcinoma	NS	-	419	Variant of unknown origin	Tumour Sample	Homozygous
p.G49D	c.146G>A	11:75566495..75566495	TCGA-AA-3713-01	1651032	Large intestine	Colon	Ascending	Carcinoma	Adenocarcinoma	NS	-	376	Confirmed Somatic	Unknown	Unknown
p.V69A	c.206T>C	11:75566555..75566555	19	2497130	Pancreas	Ampulla of Vater	NS	Carcinoma	NS	NS	26806338	-	Confirmed Somatic	Tumour Sample	Unknown
p.A75S	c.223G>T	11:75566572..75566572	CHG-13-27889T	2634324	Liver	NS	NS	Other	Neoplasm	NS	-	660	Confirmed Somatic	Tumour Sample	Unknown
p.A75T	c.223G>A	11:75566572..75566572	Thyroid-CN-WZ048T	2635109	Thyroid	NS	NS	Carcinoma	NS	NS	-	676	Confirmed Somatic	Tumour Sample	Unknown
p.A75T	c.223G>A	11:75566572..75566572	W36T	2745058	Thyroid	NS	NS	Carcinoma	NS	NS	-	676	Confirmed Somatic	Tumour Sample	Unknown
p.S77S	c.231G>A	11:75566580..75566580	T1241	2658238	Large intestine	NS	NS	Carcinoma	Adenocarcinoma	NS	27149842	-	Confirmed Somatic	Unknown	Unknown
p.L80L	c.240C>G	11:75566589..75566589	TCGA-13-0913-01	1474855	Ovary	NS	NS	Carcinoma	Serous carcinoma	NS	21720365	331	Confirmed Somatic	Tumour Sample	Heterozygous
p.V81M	c.241G>A	11:75566590..75566590	EOPC-01_tumor	2120205	Prostate	NS	NS	Carcinoma	Adenocarcinoma	NS	-	534	Confirmed Somatic	Unknown	Unknown
p.A90T	c.268G>A	11:75566617..75566617	DLD1	2301972	Large intestine	NS	NS	Carcinoma	Adenocarcinoma	NS	24755471	-	Variant of unknown origin	Cultured	Heterozygous
p.A90T	c.268G>A	11:75566617..75566617	TCGA-AP-A0LT-01	1783357	Endometrium	NS	NS	Carcinoma	Endometrioid carcinoma	NS	-	419	Variant of unknown origin	Tumour Sample	Homozygous
p.S91L	c.272C>T	11:75566621..75566621	TCGA-G2-A2EJ-01	1898122	Urinary tract	Bladder	NS	Carcinoma	NS	NS	-	413	Confirmed Somatic	Tumour Sample	Unknown
p.A99T	c.295G>A	11:75566644..75566644	T280091	2658282	Large intestine	NS	NS	Carcinoma	Adenocarcinoma	NS	27149842	-	Confirmed Somatic	Unknown	Unknown
p.E100K	c.298G>A	11:75566647..75566647	TCGA-B5-A11Y-01	1783415	Endometrium	NS	NS	Carcinoma	Endometrioid carcinoma	NS	-	419	Variant of unknown origin	Tumour Sample	Heterozygous
p.R103H	c.308G>A	11:75566657..75566657	2334188	1759437	Lung	NS	NS	Carcinoma	Small cell carcinoma	NS	22941189	-	Variant of unknown origin	Cultured	Unknown
p.D104G	c.311A>G	11:75566660..75566660	19	2497130	Pancreas	Ampulla of Vater	NS	Carcinoma	NS	NS	26806338	-	Confirmed Somatic	Tumour Sample	Unknown
p.R116H	c.347G>A	11:75566696..75566696	ESO-859	1890968	Oesophagus	NS	NS	Carcinoma	Adenocarcinoma	NS	23525077	-	Variant of unknown origin	Tumour Sample	Unknown
p.V126M	c.376G>A	11:75566725..75566725	TCGA-AP-A056-01	1783334	Endometrium	NS	NS	Carcinoma	Endometrioid carcinoma	NS	-	419	Variant of unknown origin	Tumour Sample	Heterozygous
p.L134P	c.401T>C	11:75566750..75566750	ESCC_66	2479571	Oesophagus	NS	NS	Carcinoma	Squamous cell carcinoma	NS	26873401	-	Confirmed Somatic	Unknown	Unknown
p.G136R	c.406G>A	11:75566755..75566755	THCC_167T	2746809	Liver	NS	NS	Other	Neoplasm	NS	-	323	Confirmed Somatic	Tumour Sample	Unknown
p.D145E	c.435C>G	11:75566784..75566784	ATL058	2488685	Haematopoietic and lymphoid	NS	NS	Lymphoid neoplasm	Adult T cell lymphoma-leukaemia	NS	26437031	-	Confirmed Somatic	Unknown	Unknown
p.F146F	c.438C>T	11:75566787..75566787	TCGA-C5-A1BL-01	2193310	Cervix	NS	NS	Carcinoma	Squamous cell carcinoma	NS	-	415	Confirmed Somatic	Unknown	Unknown
p.F146F	c.438C>T	11:75566787..75566787	TCGA-RP-A695-06	2339474	Skin	NS	NS	Malignant melanoma	NS	NS	-	540	Confirmed Somatic	Unknown	Unknown
p.R148H	c.443G>A	11:75566792..75566792	STC252	2404161	Stomach	NS	NS	Carcinoma	Intestinal adenocarcinoma	NS	25042771	-	Confirmed Somatic	Tumour Sample	Unknown
p.K151R	c.452A>G	11:75566801..75566801	LICA-CN-HCC053T	2634100	Liver	NS	NS	Other	Neoplasm	NS	-	660	Confirmed Somatic	Tumour Sample	Unknown
p.H153R	c.458A>G	11:75566807..75566807	BK0003	2237562	Kidney	NS	NS	Carcinoma	Clear cell renal cell carcinoma	NS	24504440	-	Confirmed Somatic	Tumour Sample	Unknown
p.S159C	c.476C>G	11:75566825..75566825	T197	2658249	Large intestine	NS	NS	Carcinoma	Adenocarcinoma	NS	27149842	-	Confirmed Somatic	Unknown	Unknown
p.D165N	c.493G>A	11:75566842..75566842	DLD1	2301972	Large intestine	NS	NS	Carcinoma	Adenocarcinoma	NS	24755471	-	Previously Reported	Cultured	Heterozygous
p.D165N	c.493G>A	11:75566842..75566842	HCT15	2301979	Large intestine	NS	NS	Carcinoma	Adenocarcinoma	NS	24755471	-	Previously Reported	Cultured	Heterozygous
p.D165N	c.493G>A	11:75566842..75566842	HCT8	2301980	Large intestine	NS	NS	Carcinoma	Adenocarcinoma	NS	24755471	-	Previously Reported	Cultured	Heterozygous
p.D165N	c.493G>A	11:75566842..75566842	T3399	2658333	Large intestine	NS	NS	Carcinoma	Adenocarcinoma	NS	27149842	-	Confirmed Somatic	Unknown	Unknown
p.R167C	c.499C>T	11:75566848..75566848	PATCZN	2730552	Haematopoietic and lymphoid	NS	NS	Lymphoid neoplasm	Acute lymphoblastic T cell leukaemia	NS	28671688	-	Confirmed Somatic	Tumour Sample	Unknown
p.R167H	c.500G>A	11:75566849..75566849	T2197	2296103	Large intestine	Colon	Transverse	Carcinoma	Adenocarcinoma	NS	25344691	-	Confirmed Somatic	Unknown	Unknown
p.R167H	c.500G>A	11:75566849..75566849	T2197	2658299	Large intestine	NS	NS	Carcinoma	Adenocarcinoma	NS	27149842	-	Confirmed Somatic	Unknown	Unknown
p.A169T	c.505G>A	11:75566854..75566854	LOVO	2301996	Large intestine	NS	NS	Carcinoma	Adenocarcinoma	NS	24755471	-	Variant of unknown origin	Cultured	Heterozygous
p.N174N	c.522C>T	11:75566871..75566871	BD57T	2459919	Biliary tract	Bile duct	NS	Carcinoma	NS	NS	-	658	Confirmed Somatic	Tumour Sample	Unknown
p.E175K	c.523G>A	11:75566872..75566872	TCGA-F5-6814-01	1651640	Large intestine	Rectum	NS	Carcinoma	Adenocarcinoma	NS	-	375	Confirmed Somatic	Tumour Sample	Unknown
p.A177A	c.531C>T	11:75566880..75566880	BD72T	2459936	Biliary tract	Bile duct	NS	Carcinoma	NS	NS	-	658	Confirmed Somatic	Tumour Sample	Unknown
p.A177A	c.531C>T	11:75566880..75566880	T3643	2658254	Large intestine	NS	NS	Carcinoma	Adenocarcinoma	NS	27149842	-	Confirmed Somatic	Unknown	Unknown
p.A178S	c.532G>T	11:75566881..75566881	S0029	2524283	Skin	Face	NS	Carcinoma	Squamous cell carcinoma	NS	27245685	-	Confirmed Somatic	Tumour Sample	Unknown
p.A178V	c.533C>T	11:75566882..75566882	TCGA-GD-A3OQ-01	1898133	Urinary tract	Bladder	NS	Carcinoma	NS	NS	-	413	Confirmed Somatic	Tumour Sample	Unknown
p.A178A	c.534G>A	11:75566883..75566883	T84	2658358	Large intestine	NS	NS	Carcinoma	Adenocarcinoma	NS	27149842	-	Confirmed Somatic	Unknown	Unknown
p.A178A	c.534G>A	11:75566883..75566883	TCGA-AX-A0J1-01	1783377	Endometrium	NS	NS	Carcinoma	Endometrioid carcinoma	NS	-	419	Previously Reported	Tumour Sample	Heterozygous
p.A178A	c.534G>A	11:75566883..75566883	HKNPC-045-Tumor-SM-64MGF	2640144	Upper aerodigestive tract	Pharynx	Nasopharynx	Carcinoma	Nasopharyngeal carcinoma	NS	28098136	-	Confirmed Somatic	Tumour Sample	Unknown
p.D182H	c.544G>C	11:75566893..75566893	PD13771a	1908793	Breast	NS	NS	Carcinoma	Ductal carcinoma	NS	-	652	Confirmed Somatic	Unknown	Unknown
p.D182N	c.544G>A	11:75566893..75566893	HCT15	2301979	Large intestine	NS	NS	Carcinoma	Adenocarcinoma	NS	24755471	-	Variant of unknown origin	Cultured	Heterozygous
p.G183S	c.547G>A	11:75566896..75566896	2014_Lung_sq_29_T	2744900	Lung	NS	NS	Carcinoma	NS	NS	-	583	Confirmed Somatic	Tumour Sample	Unknown
p.G183S	c.547G>A	11:75566896..75566896	ESCC_14	2479525	Oesophagus	NS	NS	Carcinoma	Squamous cell carcinoma	NS	26873401	-	Confirmed Somatic	Unknown	Unknown
p.G183S	c.547G>A	11:75566896..75566896	pfg019T	1943747	Stomach	NS	NS	Carcinoma	Adenocarcinoma	NS	22037554	-	Previously Reported	Tumour Sample	Unknown
p.L185L	c.553C>T	11:75566902..75566902	T115875	2658338	Large intestine	NS	NS	Carcinoma	Adenocarcinoma	NS	27149842	-	Confirmed Somatic	Unknown	Unknown
p.R194S	c.580C>A	11:75566929..75566929	Patient5_Tu	1889522	Haematopoietic and lymphoid	NS	NS	Lymphoid neoplasm	Plasma cell myeloma	NS	23396385	-	Variant of unknown origin	Tumour Sample	Unknown
p.R194H	c.581G>A	11:75566930..75566930	T68	2658261	Large intestine	NS	NS	Carcinoma	Adenocarcinoma	NS	27149842	-	Confirmed Somatic	Unknown	Unknown
p.T195M	c.584C>T	11:75566933..75566933	TCGA-HT-A5R9-01	2194208	Central nervous system	Brain	NS	Glioma	NS	NS	-	545	Confirmed Somatic	Unknown	Unknown
p.D196D	c.588C>T	11:75566937..75566937	CRC-02T	2456771	Large intestine	NS	NS	Carcinoma	Adenocarcinoma	NS	-	646	Confirmed Somatic	Tumour Sample	Unknown
p.A198T	c.592G>A	11:75566941..75566941	LIM2551	2301995	Large intestine	Colon	Right	Carcinoma	Adenocarcinoma	NS	24755471	-	Previously Reported	Cultured	Heterozygous
p.A198T	c.592G>A	11:75566941..75566941	TCGA-EL-A3GQ-01	2121976	Thyroid	NS	NS	Carcinoma	NS	NS	-	542	Confirmed Somatic	Unknown	Unknown
p.L200P	c.599T>C	11:75566948..75566948	BD124T	2459752	Biliary tract	Bile duct	NS	Carcinoma	NS	NS	-	658	Confirmed Somatic	Tumour Sample	Unknown
p.F205F	c.615C>T	11:75566964..75566964	TCGA-FU-A3WB-01	2193346	Cervix	NS	NS	Carcinoma	Squamous cell carcinoma	NS	-	415	Confirmed Somatic	Unknown	Unknown
p.H216R	c.647A>G	11:75568755..75568755	HCC13T	1566732	Liver	NS	NS	Carcinoma	Hepatocellular carcinoma	NS	21822264	-	Confirmed Somatic	Tumour Sample	Homozygous
p.R228W	c.682C>T	11:75568790..75568790	CSCC-31-T	2292472	Skin	Head neck	NS	Carcinoma	Squamous cell carcinoma	NS	25303977	-	Confirmed Somatic	Tumour Sample	Heterozygous
p.S229F	c.686C>T	11:75568794..75568794	TCGA-D3-A51R-06	2121547	Skin	NS	NS	Malignant melanoma	NS	NS	-	540	Confirmed Somatic	Unknown	Unknown
p.T231I	c.692C>T	11:75568800..75568800	TCGA-FS-A4F0-06	2121774	Skin	NS	NS	Malignant melanoma	NS	NS	-	540	Confirmed Somatic	Unknown	Unknown
p.V234V	c.702C>T	11:75568810..75568810	TCGA-EE-A29E-06	2121636	Skin	NS	NS	Malignant melanoma	NS	NS	-	540	Confirmed Somatic	Unknown	Unknown
p.M235T	c.704T>C	11:75568812..75568812	TCGA-DD-A1EI-01	2194603	Liver	NS	NS	Carcinoma	Hepatocellular carcinoma	NS	-	628	Confirmed Somatic	Unknown	Unknown
p.M235I	c.705G>A	11:75568813..75568813	B83-Tumor	2185744	Urinary tract	Bladder	NS	Carcinoma	NS	NS	-	581	Confirmed Somatic	Unknown	Unknown
p.M235I	c.705G>A	11:75568813..75568813	B83	2097324	Urinary tract	Bladder	NS	Carcinoma	Transitional cell carcinoma	NS	24121792	-	Confirmed Somatic	Tumour Sample	Unknown
p.R239Q	c.716G>A	11:75568824..75568824	CHG-2014-18604T	2634360	Liver	NS	NS	Other	Neoplasm	NS	-	660	Confirmed Somatic	Tumour Sample	Unknown
p.?	c.722-9C>A	11:75568930..75568930	2018-02-04	2746099	Large intestine	NS	NS	Carcinoma	Adenocarcinoma	NS	-	646	Confirmed Somatic	Tumour Sample	Unknown
p.Y246Y	c.738C>T	11:75568955..75568955	TCGA-G4-6320-01	1651332	Large intestine	Colon	Ascending	Carcinoma	Adenocarcinoma	NS	-	376	Confirmed Somatic	Unknown	Unknown
p.E249K	c.745G>A	11:75568962..75568962	TCGA-G4-6317-01	1651331	Large intestine	Colon	Sigmoid	Carcinoma	Adenocarcinoma	NS	-	376	Confirmed Somatic	Unknown	Unknown
p.E251K	c.751G>A	11:75568968..75568968	2748723	2748723	Biliary tract	Bile duct	NS	Carcinoma	Adenocarcinoma	NS	29360550	-	Confirmed Somatic	Tumour Sample	Unknown
p.K252N	c.756G>T	11:75568973..75568973	OSCC-GB_01030111	2340696	Upper aerodigestive tract	Mouth	NS	Carcinoma	NS	NS	-	539	Confirmed Somatic	Tumour Sample	Unknown
p.V256V	c.768G>T	11:75568985..75568985	LUAD-CHTN-Z4716A	1765258	Lung	NS	NS	Carcinoma	Adenocarcinoma	NS	22980975	-	Variant of unknown origin	Tumour Sample	Unknown
p.L260M	c.778C>A	11:75568995..75568995	pfg016T	1943744	Stomach	NS	NS	Carcinoma	Adenocarcinoma	NS	22037554	-	Variant of unknown origin	Tumour Sample	Unknown
p.A261T	c.781G>A	11:75568998..75568998	HUB-02-B2-045	2607109	Large intestine	NS	NS	Carcinoma	Adenocarcinoma	NS	-	670	Confirmed Somatic	Cultured	Unknown
p.L264L	c.792C>G	11:75569009..75569009	TCGA-CF-A47X-01	2193235	Urinary tract	Bladder	NS	Carcinoma	NS	NS	-	413	Confirmed Somatic	Unknown	Unknown
p.S266N	c.797G>A	11:75569014..75569014	587332	1766784	Large intestine	Colon	NS	Carcinoma	Adenocarcinoma	NS	22895193	-	Confirmed Somatic	Tumour Sample	Unknown
p.L267L	c.801C>T	11:75569018..75569018	LUAD-D02185	1765228	Lung	NS	NS	Carcinoma	Adenocarcinoma	NS	22980975	-	Variant of unknown origin	Tumour Sample	Unknown
p.H274H	c.822C>T	11:75569039..75569039	TCGA-CF-A47X-01	2193235	Urinary tract	Bladder	NS	Carcinoma	NS	NS	-	413	Confirmed Somatic	Unknown	Unknown
p.H274H	c.822C>T	11:75569039..75569039	TCGA-AA-3672-01	1651015	Large intestine	Colon	Transverse	Carcinoma	Adenocarcinoma	NS	22810696	376	Confirmed Somatic	Unknown	Unknown
p.P277A	c.829C>G	11:75569046..75569046	TCGA-2F-A9KP-01	2339189	Urinary tract	Bladder	NS	Carcinoma	NS	NS	-	413	Confirmed Somatic	Tumour Sample	Unknown
p.L278L	c.834C>T	11:75569051..75569051	2014_Lung_sq_52_T	2744923	Lung	NS	NS	Carcinoma	NS	NS	-	583	Confirmed Somatic	Tumour Sample	Unknown
p.L278L	c.834C>T	11:75569051..75569051	YUFERY	2439313	Skin	NS	NS	Malignant melanoma	NS	NS	26214590	-	Confirmed Somatic	Tumour Sample	Heterozygous
p.E279K	c.835G>A	11:75569052..75569052	TCGA-AA-A00N-01	1651102	Large intestine	Caecum	NS	Carcinoma	Adenocarcinoma	NS	22810696	376	Confirmed Somatic	Unknown	Unknown
p.R280C	c.838C>T	11:75569055..75569055	PCSI_0083_Pa_P	2121291	Pancreas	NS	NS	Carcinoma	Ductal carcinoma	NS	-	382	Confirmed Somatic	Unknown	Unknown
p.R280C	c.838C>T	11:75569055..75569055	PCSI_0083_Pa_P_526	2197226	Pancreas	NS	NS	Carcinoma	Ductal carcinoma	NS	-	382	Confirmed Somatic	Unknown	Unknown
p.R280C	c.838C>T	11:75569055..75569055	PCSI_0083_Pa_X	2121292	Pancreas	NS	NS	Carcinoma	Ductal carcinoma	NS	-	382	Confirmed Somatic	Unknown	Unknown
p.W293L	c.878G>T	11:75569095..75569095	534LC	2637272	Lung	NS	NS	Carcinoma	Squamous cell carcinoma	NS	26503331	-	Confirmed Somatic	Tumour Sample	Heterozygous
p.W293C	c.879G>T	11:75569096..75569096	CHG-96T	2634278	Liver	NS	NS	Other	Neoplasm	NS	-	660	Confirmed Somatic	Tumour Sample	Unknown
p.K300delK	c.893_895delAGA	11:75569110..75569112	I2L-P19Tb-Tumor-Organoid	2433500	Large intestine	Colon	Ascending	Carcinoma	Adenocarcinoma	NS	25957691	-	Confirmed Somatic	Unknown	Heterozygous
p.A301A	c.903T>C	11:75569120..75569120	TCGA-AD-5900-01	1651139	Large intestine	Colon	Ascending	Carcinoma	Adenocarcinoma	NS	-	376	Confirmed Somatic	Unknown	Unknown
p.A303T	c.907G>A	11:75569124..75569124	TCGA-GI-A2C9-01	2187741	Breast	NS	NS	Carcinoma	NS	NS	-	414	Confirmed Somatic	Unknown	Unknown
p.S305Y	c.914C>A	11:75569131..75569131	3N36-VS-3T36	2363603	Oesophagus	NS	NS	Carcinoma	Squamous cell carcinoma	NS	25839328	-	Confirmed Somatic	Unknown	Unknown
p.S305Y	c.914C>A	11:75569131..75569131	3N36-VS-3T36	2582920	Oesophagus	NS	NS	Carcinoma	Squamous cell carcinoma	NS	26759717	-	Confirmed Somatic	Tumour Sample	Unknown
p.S305Y	c.914C>A	11:75569131..75569131	3T36	2745731	Oesophagus	NS	NS	Carcinoma	NS	NS	-	582	Confirmed Somatic	Tumour Sample	Unknown
p.G309G	c.927T>C	11:75569144..75569144	TCGA-BR-4361-01	2197879	Stomach	NS	NS	Carcinoma	Adenocarcinoma	NS	-	541	Confirmed Somatic	Unknown	Unknown
p.T314T	c.942C>T	11:75569159..75569159	TCGA-D1-A103-01	1783494	Endometrium	NS	NS	Carcinoma	Endometrioid carcinoma	NS	-	419	Variant of unknown origin	Tumour Sample	Heterozygous
p.H320R	c.959A>G	11:75571785..75571785	409	2267381	Oesophagus	Lower third	NS	Carcinoma	Squamous cell carcinoma	NS	25151357	-	Confirmed Somatic	Tumour Sample	Unknown
p.L321P	c.962T>C	11:75571788..75571788	TCGA-AP-A0LT-01	1783357	Endometrium	NS	NS	Carcinoma	Endometrioid carcinoma	NS	-	419	Variant of unknown origin	Tumour Sample	Homozygous
p.G323W	c.967G>T	11:75571793..75571793	134413	1759423	Lung	NS	NS	Carcinoma	Small cell carcinoma	NS	22941189	-	Confirmed Somatic	Tumour Sample	Unknown
p.L324M	c.970C>A	11:75571796..75571796	TCGA-4Z-AA83-01	2339185	Urinary tract	Bladder	NS	Carcinoma	NS	NS	-	413	Confirmed Somatic	Tumour Sample	Unknown
p.L324P	c.971T>C	11:75571797..75571797	I2L-P19Ta-Tumor-Organoid	2433499	Large intestine	Colon	Ascending	Carcinoma	Adenocarcinoma	NS	25957691	-	Confirmed Somatic	Unknown	Heterozygous
p.A329A	c.987C>A	11:75571813..75571813	TCGA-BT-A20W-01	1779239	Urinary tract	Bladder	NS	Carcinoma	NS	NS	-	413	Confirmed Somatic	Tumour Sample	Unknown
p.I330V	c.988A>G	11:75571814..75571814	TCGA-EE-A29G-06	2121637	Skin	NS	NS	Malignant melanoma	NS	NS	-	540	Confirmed Somatic	Unknown	Unknown
p.R339H	c.1016G>A	11:75571842..75571842	TCGA-D7-A4YY-01	2198034	Stomach	NS	NS	Carcinoma	Adenocarcinoma	NS	-	541	Confirmed Somatic	Unknown	Unknown
p.K343T	c.1028A>C	11:75571854..75571854	TCGA-D9-A6EC-06	2262880	Skin	NS	NS	Malignant melanoma	NS	NS	-	540	Confirmed Somatic	Unknown	Unknown
p.L346L	c.1038G>A	11:75571864..75571864	TP_2064	2467435	Prostate	NS	NS	Carcinoma	NS	NS	26000489	-	Confirmed Somatic	Tumour Sample	Heterozygous
p.H353N	c.1057C>A	11:75571883..75571883	TCGA-CM-4743-01	1651205	Large intestine	Colon	Ascending	Carcinoma	Adenocarcinoma	NS	-	376	Confirmed Somatic	Unknown	Unknown
p.A356T	c.1066G>A	11:75571892..75571892	TCGA-BR-4362-01	2197926	Stomach	NS	NS	Carcinoma	Adenocarcinoma	NS	-	541	Confirmed Somatic	Unknown	Unknown
p.A356T	c.1066G>A	11:75571892..75571892	TCGA-CG-5728-01	2197957	Stomach	NS	NS	Carcinoma	Adenocarcinoma	NS	-	541	Confirmed Somatic	Unknown	Unknown
p.E358Q	c.1072G>C	11:75571898..75571898	TCGA-DK-A3IT-01	1898108	Urinary tract	Bladder	NS	Carcinoma	NS	NS	-	413	Confirmed Somatic	Tumour Sample	Unknown
p.Q368*	c.1102C>T	11:75571928..75571928	TCGA-DB-A4XD-01	2194305	Central nervous system	Brain	NS	Glioma	NS	NS	-	545	Confirmed Somatic	Unknown	Unknown
p.R373C	c.1117C>T	11:75571943..75571943	8016470	1842414	Pancreas	NS	NS	Carcinoma	Ductal carcinoma	NS	-	328	Confirmed Somatic	Cultured	Unknown
p.R373P	c.1118G>C	11:75571944..75571944	TCGA-37-5819-01	1781485	Lung	NS	NS	Carcinoma	Squamous cell carcinoma	NS	-	418	Confirmed Somatic	Tumour Sample	Unknown
p.R373R	c.1119C>T	11:75571945..75571945	TCGA-BS-A0U7-01	1783469	Endometrium	NS	NS	Carcinoma	Endometrioid carcinoma	NS	-	419	Variant of unknown origin	Tumour Sample	Homozygous
p.R377C	c.1129C>T	11:75571955..75571955	T2197	2296103	Large intestine	Colon	Transverse	Carcinoma	Adenocarcinoma	NS	25344691	-	Confirmed Somatic	Unknown	Unknown
p.R377C	c.1129C>T	11:75571955..75571955	T2197	2658299	Large intestine	NS	NS	Carcinoma	Adenocarcinoma	NS	27149842	-	Confirmed Somatic	Unknown	Unknown
p.F382L	c.1146C>A	11:75571972..75571972	TCGA-CF-A47T-01	2193197	Urinary tract	Bladder	NS	Carcinoma	NS	NS	-	413	Confirmed Somatic	Unknown	Unknown
p.F382L	c.1146C>A	11:75571972..75571972	TCGA-BS-A0UV-01	1783478	Endometrium	NS	NS	Carcinoma	Endometrioid carcinoma	NS	-	419	Previously Reported	Tumour Sample	Heterozygous
p.L400L	c.1200G>T	11:75572026..75572026	CHG-13-29153T	2634325	Liver	NS	NS	Other	Neoplasm	NS	-	660	Confirmed Somatic	Tumour Sample	Unknown
p.L406V	c.1216C>G	11:75572042..75572042	TCGA-61-2097-01	1474952	Ovary	NS	NS	Carcinoma	Serous carcinoma	NS	21720365	331	Confirmed Somatic	Tumour Sample	Heterozygous
p.V407V	c.1221C>T	11:75572047..75572047	TCGA-BR-4361-01	2197879	Stomach	NS	NS	Carcinoma	Adenocarcinoma	NS	-	541	Confirmed Somatic	Unknown	Unknown
p.G411V	c.1232G>T	11:75572058..75572058	CHG-2014-13450T	2634358	Liver	NS	NS	Other	Neoplasm	NS	-	660	Confirmed Somatic	Tumour Sample	Unknown
p.R415*	c.1243C>T	11:75572069..75572069	2748747	2748747	Biliary tract	Bile duct	NS	Carcinoma	Adenocarcinoma	NS	29360550	-	Confirmed Somatic	Tumour Sample	Unknown
p.R415Q	c.1244G>A	11:75572070..75572070	CHG-2014-13450T	2634358	Liver	NS	NS	Other	Neoplasm	NS	-	660	Confirmed Somatic	Tumour Sample	Unknown
p.L418F	c.1254A>T	11:75572080..75572080	CHG-2014-13450T	2634358	Liver	NS	NS	Other	Neoplasm	NS	-	660	Confirmed Somatic	Tumour Sample	Unknown
