# Supplementary material for: Mutational Hotspots and Protein Interactome Analyses of Collagen-Specific Chaperone&mdash;HSP47
Source: Preprints.org preprint supplement (doi:10.20944/preprints201811.0280.v1), 2018-11-12
Supplement: Supplementary file 4 [file TableS4_HSP47_cBioPortal.xlsx]

## Sheet: Sheet1
Mutation	SIFT status	SIFT score	Polyphen V2 status	Polyphen V2 score	Sample ID	Cancer Type	Mutation Type	Copy #	COSMIC	Chromosome	Start Pos	End Pos	Ref	Var	Allele Freq (T)	Allele Freq (N)	Variant Reads	Ref Reads	Variant Reads (N)	Ref Reads (N)	# Mut in Sample
UVRAG-SERPINH1					TCGA-13-A5FT-01	Serous Ovarian Cancer	Fusion			11	-1	-1	NA								74
SERPINH1-MYO7A					TCGA-GN-A8LL-06	Cutaneous Melanoma	Fusion			11	-1	-1	NA								46
GDPD5-SERPINH1					TCGA-GN-A8LL-06	Cutaneous Melanoma	Fusion			11	-1	-1	NA								46
R2H	tolerated_low_confidence	0.19	benign	0.212	MM18T	Uterine Carcinosarcoma/Uterine Malignant Mixed Mullerian Tumor	Missense_Mutation			11	75277399	75277399	G	A							5596
A9T	tolerated	0.49	benign	0	TCGA-B5-A3FC-01	Uterine Endometrioid Carcinoma	Missense_Mutation			11	75277419	75277419	G	A			24	41		85	12218
A19T	tolerated	0.13	unknown	0	PDA_032	Pancreatic Adenocarcinoma	Missense_Mutation			11	75277449	75277449	G	A							107
A19T	tolerated	0.13	unknown	0	SC_9163	Prostate Adenocarcinoma	Missense_Mutation			11	75277449	75277449	G	A			121	173			1208
K22N	deleterious_low_confidence	0.03	possibly_damaging	0.766	MBC-MBCProject_7of5i3hp-Tumor-SM-CGMAA	Breast Invasive Ductal Carcinoma	Missense_Mutation			11	75277460	75277460	G	C							36
A40V	deleterious	0.01	probably_damaging	0.996	coadread_dfci_2016_353622	Colorectal Adenocarcinoma	Missense_Mutation			11	75277513	75277513	C	T							70
T42M	tolerated	0.11	benign	0.302	PCNSL_5	Diffuse Large B-Cell Lymphoma, NOS	Missense_Mutation			11	75277519	75277519	C	T							126
A44T	deleterious	0.02	probably_damaging	0.96	TCGA-LN-A4A2-01	Esophageal Squamous Cell Carcinoma	Missense_Mutation			11	75277524	75277524	G	A			14	25		51	160
A44T	deleterious	0.02	probably_damaging	0.96	TCGA-LN-A4A2-01	Esophageal Squamous Cell Carcinoma	Missense_Mutation			11	75277524	75277524	G	A							157
A44T	deleterious	0.02	probably_damaging	0.96	TCGA-LN-A4A2-01	Esophageal Squamous Cell Carcinoma	Missense_Mutation			11	75277524	75277524	G	A			13	23		49	124
A59G	tolerated	0.17	possibly_damaging	0.904	TCGA-HB-A43Z-01	Leiomyosarcoma	Missense_Mutation			11	75277570	75277570	C	G			19	42		60	43
A59G	tolerated	0.17	possibly_damaging	0.904	TCGA-HB-A43Z-01	Leiomyosarcoma	Missense_Mutation			11	75277570	75277570	C	G			17	39		56	58
S76L	deleterious	0	possibly_damaging	0.665	Pt7	Cutaneous Melanoma	Missense_Mutation			11	75277621	75277621	C	T							1164
S76L	deleterious	0	possibly_damaging	0.665	TCGA-D1-A3DA-01	Uterine Endometrioid Carcinoma	Missense_Mutation			11	75277621	75277621	C	T			11	14		33	75
S77L	deleterious	0.01	possibly_damaging	0.713	TCGA-FF-8042-01	Diffuse Large B-Cell Lymphoma	Missense_Mutation			11	75277624	75277624	C	T			5	7		14	227
S77L	deleterious	0.01	possibly_damaging	0.713	TCGA-FF-8042-01	Diffuse Large B-Cell Lymphoma, NOS	Missense_Mutation			11	75277624	75277624	C	T			4	6		12
G79V	deleterious	0.01	probably_damaging	0.994	TCGA-EE-A3AC-06	Cutaneous Melanoma	Missense_Mutation			11	75277630	75277630	G	T			4	31		40	1867
L83V	deleterious	0.04	benign	0.266	Lung-DFCI-11-104-009-Tumor-SM-5YS7O	Lung Adenocarcinoma	Missense_Mutation			11	75277641	75277641	C	G			13	25
G85D	deleterious	0	probably_damaging	0.918	TCGA-DF-A2KZ-01	Uterine Endometrioid Carcinoma	Missense_Mutation			11	75277648	75277648	G	A			10	19		23	600
A90T	deleterious	0	possibly_damaging	0.887	TCGA-AP-A0LT-01	Uterine Endometrioid Carcinoma	Missense_Mutation		1	11	75277662	75277662	G	A			8	6		12	477
A90T	deleterious	0	possibly_damaging	0.887	TCGA-AP-A0LT-01	Uterine Endometrioid Carcinoma	Missense_Mutation		1	11	75277662	75277662	G	A			8	5		12	638
A90T	deleterious	0	possibly_damaging	0.887	TCGA-AP-A0LT-01	Uterine Endometrioid Carcinoma	Missense_Mutation		1	11	75277662	75277662	G	A			8	6		12	477
S91L	deleterious	0.01	possibly_damaging	0.586	TCGA-G2-A2EJ-01	Bladder Urothelial Carcinoma	Missense_Mutation		1	11	75277666	75277666	C	T							286
S91L	deleterious	0.01	possibly_damaging	0.586	TCGA-G2-A2EJ-01	Bladder Urothelial Carcinoma	Missense_Mutation		1	11	75277666	75277666	C	T				19			283
S91L	deleterious	0.01	possibly_damaging	0.586	TCGA-G2-A2EJ-01	Bladder Urothelial Carcinoma	Missense_Mutation		1	11	75277666	75277666	C	T			6	19			269
S91L	deleterious	0.01	possibly_damaging	0.586	TCGA-G2-A2EJ-01	Bladder Urothelial Carcinoma	Missense_Mutation		1	11	75277666	75277666	C	T			6	19		46	537
A99T	tolerated	0.16	possibly_damaging	0.821	coadread_dfci_2016_280091	Colorectal Adenocarcinoma	Missense_Mutation			11	75277689	75277689	G	A							968
E100K	tolerated	0.87	benign	0	TCGA-B5-A11Y-01	Uterine Endometrioid Carcinoma	Missense_Mutation		1	11	75277692	75277692	G	A			9	14	1	17	813
E100K	tolerated	0.87	benign	0	TCGA-B5-A11Y-01	Uterine Endometrioid Carcinoma	Missense_Mutation		1	11	75277692	75277692	G	A			8	14		17	954
E100K	tolerated	0.87	benign	0	TCGA-B5-A11Y-01	Uterine Endometrioid Carcinoma	Missense_Mutation		1	11	75277692	75277692	G	A			9	14	1	17	813
R103C	deleterious	0.03	possibly_damaging	0.825	TCGA-CD-A4MJ-01	Stomach Adenocarcinoma	Missense_Mutation		1	11	75277701	75277701	C	T			2	15		18	700
R103C	deleterious	0.03	possibly_damaging	0.825	TCGA-CD-A4MJ-01	Stomach Adenocarcinoma	Missense_Mutation		1	11	75277701	75277701	C	T							683
R103H	tolerated	0.11	possibly_damaging	0.631	2334188	Small Cell Lung Cancer	Missense_Mutation		1	11	75277702	75277702	G	A							160
E106K	tolerated	0.89	benign	0.039	TCGA-GN-A8LK-06	Cutaneous Melanoma	Missense_Mutation			11	75277710	75277710	G	A			6	5		16	1669
R116S	tolerated	0.9	benign	0.003	Karpas422	Germinal Center B-Cell Type	Missense_Mutation		1	11	75277740	75277740	C	A							442
R116H	tolerated	0.11	benign	0.224	ESO-859	Esophageal Adenocarcinoma	Missense_Mutation		1	11	75277741	75277741	G	A				7			1681
R116H	tolerated	0.11	benign	0.224	TCGA-BR-4257-01	Stomach Adenocarcinoma	Missense_Mutation		1	11	75277741	75277741	G	A			3	11		14	1040
R116H	tolerated	0.11	benign	0.224	TCGA-BR-4257-01	Stomach Adenocarcinoma	Missense_Mutation		1	11	75277741	75277741	G	A							1002
R124Qfs*20	undefined	undefined	undefined	undefined	TCGA-17-Z031-01	Lung Adenocarcinoma	Frame_Shift_Del			11	75277761	75277762	GC	-			11	22		20	2084
V126M	tolerated	0.14	possibly_damaging	0.862	TCGA-AP-A056-01	Uterine Endometrioid Carcinoma	Missense_Mutation		1	11	75277770	75277770	G	A			6	11		14	7218
V126M	tolerated	0.14	possibly_damaging	0.862	TCGA-AP-A056-01	Uterine Endometrioid Carcinoma	Missense_Mutation		1	11	75277770	75277770	G	A			6	10		14	8236
V126M	tolerated	0.14	possibly_damaging	0.862	TCGA-EO-A22U-01	Uterine Endometrioid Carcinoma	Missense_Mutation		1	11	75277770	75277770	G	A			11	11		8	13840
V126M	tolerated	0.14	possibly_damaging	0.862	TCGA-AP-A056-01	Uterine Endometrioid Carcinoma	Missense_Mutation		1	11	75277770	75277770	G	A			6	11		14	7211
R133Q	deleterious	0.04	probably_damaging	0.963	TCGA-AP-A1DV-01	Uterine Endometrioid Carcinoma	Missense_Mutation			11	75277792	75277792	G	A			12	9		14	12071
S139P	deleterious	0.01	probably_damaging	0.935	TCGA-BC-A3KG-01	Hepatocellular Carcinoma	Missense_Mutation			11	75277809	75277809	T	C			7	147		167	325
S141I	deleterious	0.01	benign	0.355	TCGA-X6-A7WA-01	Leiomyosarcoma	Missense_Mutation			11	75277816	75277816	G	T			3	29		19	470
V147E	deleterious	0	probably_damaging	0.982	TCGA-VQ-A91S-01	Tubular Stomach Adenocarcinoma	Missense_Mutation			11	75277834	75277834	T	A			9	52		56	230
R148H	deleterious	0.01	possibly_damaging	0.537	TCGA-NH-A5IV-01	Colon Adenocarcinoma	Missense_Mutation			11	75277837	75277837	G	A			26	32		43	2378
S150R	deleterious	0	probably_damaging	0.99	H072969	Hepatocellular Adenoma	Missense_Mutation			11	75277844	75277844	C	A				21			597
H153Y	deleterious	0	probably_damaging	0.933	TCGA-CK-4951-01	Mucinous Adenocarcinoma of the Colon and Rectum	Missense_Mutation			11	75277851	75277851	C	T			11	17		64	4195
S159C	deleterious	0	probably_damaging	0.979	coadread_dfci_2016_197	Colorectal Adenocarcinoma	Missense_Mutation			11	75277870	75277870	C	G							1518
D165N	tolerated	0.19	probably_damaging	0.999	coadread_dfci_2016_3399	Colorectal Adenocarcinoma	Missense_Mutation			11	75277887	75277887	G	A							482
D165N	tolerated	0.19	probably_damaging	0.999	TCGA-06-5416-01	Glioblastoma Multiforme	Missense_Mutation			11	75277887	75277887	G	A			70	99		120	12192
D165N	tolerated	0.19	probably_damaging	0.999	HCT_15	Colorectal Adenocarcinoma	Missense_Mutation			11	75277887	75277887	G	A
R167H	deleterious	0.01	probably_damaging	0.98	coadread_dfci_2016_2197	Colorectal Adenocarcinoma	Missense_Mutation			11	75277894	75277894	G	A							847
Q171L	tolerated	0.06	benign	0.121	TCGA-77-7463-01	Lung Squamous Cell Carcinoma	Missense_Mutation			11	75277906	75277906	A	T			18	46		62	359
Q171L	tolerated	0.06	benign	0.121	TCGA-77-7463-01	Lung Squamous Cell Carcinoma	Missense_Mutation			11	75277906	75277906	A	T			18	44		57	342
I173V	deleterious	0.01	possibly_damaging	0.898	PGM14	Esophagogastric Adenocarcinoma	Missense_Mutation			11	75277911	75277911	A	G							142
E175K	tolerated	0.12	possibly_damaging	0.818	TCGA-FA-A7DS-01	Diffuse Large B-Cell Lymphoma	Missense_Mutation		1	11	75277917	75277917	G	A			22	36		39	67
E175K	tolerated	0.12	possibly_damaging	0.818	TCGA-F5-6814-01	Rectal Adenocarcinoma	Missense_Mutation		1	11	75277917	75277917	G	A			10	13		29	9460
E175K	tolerated	0.12	possibly_damaging	0.818	TCGA-FA-A7DS-01	Diffuse Large B-Cell Lymphoma, NOS	Missense_Mutation		1	11	75277917	75277917	G	A			20	35		35
A178V	tolerated	0.06	possibly_damaging	0.834	MM-0392	Multiple Myeloma	Missense_Mutation			11	75277927	75277927	C	T							33
A178V	tolerated	0.06	possibly_damaging	0.834	TCGA-GD-A3OQ-01	Bladder Urothelial Carcinoma	Missense_Mutation			11	75277927	75277927	C	T				60			113
A178V	tolerated	0.06	possibly_damaging	0.834	TCGA-GD-A3OQ-01	Bladder Urothelial Carcinoma	Missense_Mutation			11	75277927	75277927	C	T			9	66		87	109
A178V	tolerated	0.06	possibly_damaging	0.834	TCGA-EA-A3HS-01	Cervical Squamous Cell Carcinoma	Missense_Mutation			11	75277927	75277927	C	T			21	27		41	712
A178V	tolerated	0.06	possibly_damaging	0.834	CAC_2987	Ampullary Carcinoma	Missense_Mutation			11	75277927	75277927	C	T			14	65		103
D182N	tolerated	0.15	benign	0.042	HCT_15	Colorectal Adenocarcinoma	Missense_Mutation			11	75277938	75277938	G	A
G183S	deleterious	0.01	probably_damaging	0.997	pfg019T	Stomach Adenocarcinoma	Missense_Mutation		1	11	75277941	75277941	G	A							568
K184Q	deleterious	0.01	probably_damaging	0.977	MBC-MBCProject_pMcWcrtZ-Tumor-SM-AZ5KE	Breast Invasive Ductal Carcinoma	Missense_Mutation			11	75277944	75277944	A	C							124
E187K	deleterious	0.02	possibly_damaging	0.884	MBC-MBCProject_AqtYu0IW-Tumor-SM-DL4Y4	Breast Invasive Ductal Carcinoma	Missense_Mutation			11	75277953	75277953	G	A							56
D191H	deleterious	0.04	possibly_damaging	0.819	TCGA-50-6590-01	Lung Adenocarcinoma	Missense_Mutation		1	11	75277965	75277965	G	C			4	38		30	831
D191H	deleterious	0.04	possibly_damaging	0.819	TCGA-50-6590-01	Lung Adenocarcinoma	Missense_Mutation		1	11	75277965	75277965	G	C			4	36		29	826
R194H	tolerated	0.11	possibly_damaging	0.501	coadread_dfci_2016_68	Colorectal Adenocarcinoma	Missense_Mutation		1	11	75277975	75277975	G	A							1422
T195M	tolerated	0.08	benign	0.258	TCGA-HT-A5R9-01	Diffuse Glioma	Missense_Mutation		1	11	75277978	75277978	C	T			29	97		64	26
T195M	tolerated	0.08	benign	0.258	TCGA-HT-A5R9-01	Anaplastic Oligoastrocytoma	Missense_Mutation		1	11	75277978	75277978	C	T			29	97			32
T195M	tolerated	0.08	benign	0.258	TCGA-HT-A5R9-01	Oligodendroglioma	Missense_Mutation		1	11	75277978	75277978	C	T			29	92		62	39
A198T	tolerated	0.18	probably_damaging	0.979	TCGA-EL-A3GQ-01	Papillary Thyroid Cancer	Missense_Mutation		1	11	75277986	75277986	G	A				45			13
A198T	tolerated	0.18	probably_damaging	0.979	TCGA-EL-A3GQ-01	Follicular Thyroid Cancer	Missense_Mutation		1	11	75277986	75277986	G	A			29	45			14
A198T	tolerated	0.18	probably_damaging	0.979	TCGA-EL-A3GQ-01	Papillary Thyroid Cancer	Missense_Mutation		1	11	75277986	75277986	G	A			33	47		60	13
L199M	tolerated	0.97	benign	0.112	TCGA-ER-A19F-06	Cutaneous Melanoma	Missense_Mutation			11	75277989	75277989	C	A			4	36		29	1664
A203T	deleterious	0.03	benign	0.175	ICGC_GBM56	B-Lymphoblastic Leukemia/Lymphoma	Missense_Mutation			11	75278001	75278001	G	A							306
M204V	deleterious	0.03	benign	0.157	TCGA-A5-A0G2-01	Uterine Serous Carcinoma/Uterine Papillary Serous Carcinoma	Missense_Mutation			11	75278004	75278004	A	G			4	21		17	25734
K217N	tolerated	0.05	benign	0.253	TCGA-ZB-A96H-01	Thymoma	Missense_Mutation			11	75279804	75279804	G	T			4	24		22	23
R228W	deleterious	0	probably_damaging	0.991	CSCC-31-T	Cutaneous Squamous Cell Carcinoma	Missense_Mutation			11	75279835	75279835	C	T			25	109		59	7115
R228L	tolerated	0.11	probably_damaging	0.965	TCGA-EE-A3AC-06	Cutaneous Melanoma	Missense_Mutation			11	75279836	75279836	G	T			4	40		65	1867
S229P	deleterious	0.04	probably_damaging	0.941	TCGA-ES-A2HT-01	Hepatocellular Carcinoma	Missense_Mutation		1	11	75279838	75279838	T	C			5	116		237	702
S229F	tolerated	0.06	benign	0.054	TCGA-D3-A51R-06	Cutaneous Melanoma	Missense_Mutation		1	11	75279839	75279839	C	T			28	4			590
S229F	tolerated	0.06	benign	0.054	TCGA-D3-A51R-06	Cutaneous Melanoma	Missense_Mutation		1	11	75279839	75279839	C	T			32	5		25	592
T231I	deleterious	0	probably_damaging	0.984	TCGA-FS-A4F0-06	Cutaneous Melanoma	Missense_Mutation		1	11	75279845	75279845	C	T			52	68		77	468
M235I	tolerated	0.18	benign	0.062	B83	Bladder Urothelial Carcinoma	Missense_Mutation		2	11	75279858	75279858	G	A							109
R239Q	tolerated	0.44	benign	0.243	DLBCL-Ls1899	Diffuse Large B-Cell Lymphoma	Missense_Mutation			11	75279869	75279869	G	A							229
R239Q	tolerated	0.44	benign	0.243	TCGA-F4-6703-01	Colon Adenocarcinoma	Missense_Mutation			11	75279869	75279869	G	A			6	56		21	530
G241D	tolerated	0.07	probably_damaging	0.999	TCGA-A5-A0G1-01	Uterine Serous Carcinoma/Uterine Papillary Serous Carcinoma	Missense_Mutation			11	75279984	75279984	G	A			34	91		167	10825
E249K	tolerated	0.77	benign	0.022	TCGA-G4-6317-01	Colon Adenocarcinoma	Missense_Mutation		1	11	75280007	75280007	G	A			9	26		61	86
V256M	deleterious	0.01	possibly_damaging	0.8	MBC-MBCProject_AqtYu0IW-Tumor-SM-DL4Y4	Breast Invasive Ductal Carcinoma	Missense_Mutation			11	75280028	75280028	G	A							56
L260M	deleterious	0.01	probably_damaging	0.999	pfg016T	Stomach Adenocarcinoma	Missense_Mutation		1	11	75280040	75280040	C	A							916
S266N	deleterious	0	probably_damaging	0.961	587332	Colorectal Adenocarcinoma	Missense_Mutation		1	11	75280059	75280059	G	A							1457
P277_K287delinsA	undefined	undefined	undefined	undefined	TCGA-2F-A9KP-01	Bladder Urothelial Carcinoma	In_Frame_Del			11	75280091	75280123	CCTCTCGAGCGCCTTGAAAAGCTGCTAACCAAA	GCT			5	27		59	132
E279K	tolerated	0.13	benign	0.37	TCGA-AA-A00N-01	Colorectal Adenocarcinoma	Missense_Mutation		1	11	75280097	75280097	G	A							3503
E279K	tolerated	0.13	benign	0.37	TCGA-AA-A00N-01	Mucinous Adenocarcinoma of the Colon and Rectum	Missense_Mutation		1	11	75280097	75280097	G	A							3505
E279K	tolerated	0.13	benign	0.37	TCGA-AA-A00N-01	Mucinous Adenocarcinoma of the Colon and Rectum	Missense_Mutation		1	11	75280097	75280097	G	A			36	90		291	4872
R280C	deleterious	0	probably_damaging	0.977	TCGA-CV-7261-01	Head and Neck Squamous Cell Carcinoma	Missense_Mutation		2	11	75280100	75280100	C	T				33			103
R280C	deleterious	0	probably_damaging	0.977	TCGA-CV-7261-01	Head and Neck Squamous Cell Carcinoma	Missense_Mutation		2	11	75280100	75280100	C	T			27	33			111
R280C	deleterious	0	probably_damaging	0.977	TCGA-CV-7261-01	Head and Neck Squamous Cell Carcinoma	Missense_Mutation		2	11	75280100	75280100	C	T			27	35		76	173
R280C	deleterious	0	probably_damaging	0.977	AMPAC_2713	Ampullary Carcinoma	Missense_Mutation		2	11	75280100	75280100	C	T			23	131		129
L281I	tolerated	0.16	possibly_damaging	0.651	TCGA-A5-A1OF-01	Uterine Mixed Endometrial Carcinoma	Missense_Mutation			11	75280103	75280103	C	A			6	41		41	10507
K283N	deleterious	0.04	benign	0.157	H072969	Hepatocellular Adenoma	Missense_Mutation			11	75280111	75280111	G	T				27			597
K291N	tolerated	0.63	benign	0.001	TCGA-BS-A0UV-01	Uterine Endometrioid Carcinoma	Missense_Mutation			11	75280135	75280135	G	T			10	93		152	8973
A303T	tolerated	0.07	benign	0.233	TCGA-GI-A2C9-01	Invasive Breast Carcinoma	Missense_Mutation		1	11	75280169	75280169	G	A			4	29		46	112
A303T	tolerated	0.07	benign	0.233	TCGA-GI-A2C9-01	Breast Invasive Ductal Carcinoma	Missense_Mutation		1	11	75280169	75280169	G	A			4	29			98
A303T	tolerated	0.07	benign	0.233	TCGA-FI-A2D5-01	Uterine Endometrioid Carcinoma	Missense_Mutation		1	11	75280169	75280169	G	A			18	29		59	13876
K308E	deleterious	0	probably_damaging	0.999	TCGA-DD-AADI-01	Hepatocellular Carcinoma	Missense_Mutation			11	75280184	75280184	A	G			11	107		72	91
K308E	deleterious	0	probably_damaging	0.999	TCGA-DD-AADI-01	Hepatocellular Carcinoma	Missense_Mutation			11	75280184	75280184	A	G			9	97		61	106
L321P	deleterious	0	probably_damaging	1	TCGA-AP-A0LT-01	Uterine Endometrioid Carcinoma	Missense_Mutation		1	11	75282833	75282833	T	C			12	33		49	477
L321P	deleterious	0	probably_damaging	1	TCGA-AP-A0LT-01	Uterine Endometrioid Carcinoma	Missense_Mutation		1	11	75282833	75282833	T	C			12	32		49	638
L321P	deleterious	0	probably_damaging	1	TCGA-AP-A0LT-01	Uterine Endometrioid Carcinoma	Missense_Mutation		1	11	75282833	75282833	T	C			12	33		49	477
G323W	deleterious	0.01	possibly_damaging	0.907	134413	Small Cell Lung Cancer	Missense_Mutation		1	11	75282838	75282838	G	T							213
L324M	tolerated	0.32	possibly_damaging	0.759	TCGA-4Z-AA83-01	Bladder Urothelial Carcinoma	Missense_Mutation			11	75282841	75282841	C	A				21			77
L324M	tolerated	0.32	possibly_damaging	0.759	TCGA-4Z-AA83-01	Bladder Urothelial Carcinoma	Missense_Mutation			11	75282841	75282841	C	A			10	24		47	75
L326R	deleterious	0	probably_damaging	0.999	TCGA-N9-A4Q3-01	Uterine Carcinosarcoma/Uterine Malignant Mixed Mullerian Tumor	Missense_Mutation			11	75282848	75282848	T	G			23	17			39
L326R	deleterious	0	probably_damaging	0.999	TCGA-N9-A4Q3-01	Uterine Carcinosarcoma/Uterine Malignant Mixed Mullerian Tumor	Missense_Mutation			11	75282848	75282848	T	G			24	17		67	40
A329T	deleterious	0.02	probably_damaging	0.996	TCGA-AX-A1CE-01	Uterine Endometrioid Carcinoma	Missense_Mutation			11	75282856	75282856	G	A			14	11		24	11452
I330V	tolerated	1	benign	0.001	TCGA-EE-A29G-06	Cutaneous Melanoma	Missense_Mutation		1	11	75282859	75282859	A	G			8	41			341
I330V	tolerated	1	benign	0.001	TCGA-EE-A29G-06	Cutaneous Melanoma	Missense_Mutation		1	11	75282859	75282859	A	G			9	46		57	680
R339H	tolerated	0.07	possibly_damaging	0.597	TCGA-D7-A4YY-01	Stomach Adenocarcinoma	Missense_Mutation		2	11	75282887	75282887	G	A				54			425
R339H	tolerated	0.07	possibly_damaging	0.597	TCGA-AA-A00J-01	Colorectal Adenocarcinoma	Missense_Mutation		2	11	75282887	75282887	G	A							805
R339H	tolerated	0.07	possibly_damaging	0.597	TCGA-AA-A00J-01	Mucinous Adenocarcinoma of the Colon and Rectum	Missense_Mutation		2	11	75282887	75282887	G	A							876
R339H	tolerated	0.07	possibly_damaging	0.597	TCGA-D7-A4YY-01	Stomach Adenocarcinoma	Missense_Mutation		2	11	75282887	75282887	G	A			27	57		63	419
K343T	deleterious	0.03	probably_damaging	0.984	TCGA-D9-A6EC-06	Cutaneous Melanoma	Missense_Mutation			11	75282899	75282899	A	C			9	38			3890
K343T	deleterious	0.03	probably_damaging	0.984	TCGA-D9-A6EC-06	Cutaneous Melanoma	Missense_Mutation			11	75282899	75282899	A	C			10	40		35	3680
V351M	tolerated	0.09	possibly_damaging	0.488	TCGA-DD-AACP-01	Hepatocellular Carcinoma	Missense_Mutation			11	75282922	75282922	G	A			36	24	1	75	170
H353N	deleterious	0	probably_damaging	0.99	TCGA-CM-4743-01	Colon Adenocarcinoma	Missense_Mutation		1	11	75282928	75282928	C	A			13	56		74	1107
A356T	tolerated	0.26	benign	0.185	TCGA-BR-4362-01	Stomach Adenocarcinoma	Missense_Mutation		2	11	75282937	75282937	G	A			13	33		53	1534
A356T	tolerated	0.26	benign	0.185	TCGA-BR-4362-01	Stomach Adenocarcinoma	Missense_Mutation		2	11	75282937	75282937	G	A				32			1647
A356T	tolerated	0.26	benign	0.185	TCGA-CG-5728-01	Stomach Adenocarcinoma	Missense_Mutation		2	11	75282937	75282937	G	A				31			1345
A356T	tolerated	0.26	benign	0.185	TCGA-BR-4362-01	Stomach Adenocarcinoma	Missense_Mutation		2	11	75282937	75282937	G	A							1496
A356T	tolerated	0.26	benign	0.185	TCGA-CG-5728-01	Stomach Adenocarcinoma	Missense_Mutation		2	11	75282937	75282937	G	A							1406
A356T	tolerated	0.26	benign	0.185	TCGA-BR-4362-01	Stomach Adenocarcinoma	Missense_Mutation		2	11	75282937	75282937	G	A			12	34		54	1469
A356T	tolerated	0.26	benign	0.185	TCGA-CG-5728-01	Intestinal Type Stomach Adenocarcinoma	Missense_Mutation		2	11	75282937	75282937	G	A			5	33		64	1286
A356T	tolerated	0.26	benign	0.185	TCGA-B5-A3FA-01	Uterine Endometrioid Carcinoma	Missense_Mutation		2	11	75282937	75282937	G	A			4	10		23	9662
E358Q	deleterious	0.01	probably_damaging	0.999	TCGA-DK-A3IT-01	Bladder Urothelial Carcinoma	Missense_Mutation		1	11	75282943	75282943	G	C							381
E358Q	deleterious	0.01	probably_damaging	0.999	TCGA-DK-A3IT-01	Bladder Urothelial Carcinoma	Missense_Mutation		1	11	75282943	75282943	G	C				27			389
E358Q	deleterious	0.01	probably_damaging	0.999	TCGA-DK-A3IT-01	Bladder Urothelial Carcinoma	Missense_Mutation		1	11	75282943	75282943	G	C			17	27			374
E358Q	deleterious	0.01	probably_damaging	0.999	TCGA-DK-A3IT-01	Bladder Urothelial Carcinoma	Missense_Mutation		1	11	75282943	75282943	G	C			21	30		81	398
D360G	tolerated	0.13	possibly_damaging	0.878	TCGA-FI-A2D5-01	Uterine Endometrioid Carcinoma	Missense_Mutation			11	75282950	75282950	A	G			25	44		74	13876
F366L	tolerated	0.61	benign	0.023	TCGA-EI-6881-01	Rectal Adenocarcinoma	Missense_Mutation			11	75282967	75282967	T	C			3	25		33	102
R373C	tolerated	0.05	possibly_damaging	0.684	ICGC_0076	Pancreatic Adenocarcinoma	Missense_Mutation		2	11	75282988	75282988	C	T							1099
R373P	tolerated	0.28	benign	0.326	TCGA-37-5819-01	Lung Squamous Cell Carcinoma	Missense_Mutation		2	11	75282989	75282989	G	C				2			659
R373P	tolerated	0.28	benign	0.326	TCGA-37-5819-01	Lung Squamous Cell Carcinoma	Missense_Mutation		2	11	75282989	75282989	G	C			20	2			660
R373P	tolerated	0.28	benign	0.326	TCGA-37-5819-01	Lung Squamous Cell Carcinoma	Missense_Mutation		2	11	75282989	75282989	G	C			19	2		26	685
R373P	tolerated	0.28	benign	0.326	TCGA-37-5819-01	Lung Squamous Cell Carcinoma	Missense_Mutation		2	11	75282989	75282989	G	C			20	2		25	669
R377C	deleterious	0	probably_damaging	0.916	coadread_dfci_2016_2197	Colorectal Adenocarcinoma	Missense_Mutation			11	75283000	75283000	C	T							847
R377C	deleterious	0	probably_damaging	0.916	HP_ES_LMU_KAP227	B-Lymphoblastic Leukemia/Lymphoma	Missense_Mutation			11	75283000	75283000	C	T							57
F382L	deleterious	0	probably_damaging	0.998	TCGA-CF-A47T-01	Bladder Urothelial Carcinoma	Missense_Mutation		1	11	75283017	75283017	C	A				23			28
F382L	deleterious	0	probably_damaging	0.998	TCGA-BS-A0UV-01	Uterine Endometrioid Carcinoma	Missense_Mutation		1	11	75283017	75283017	C	A			8	37		51	7816
F382L	deleterious	0	probably_damaging	0.998	TCGA-BS-A0UV-01	Uterine Endometrioid Carcinoma	Missense_Mutation		1	11	75283017	75283017	C	A			8	37		50	8973
F382L	deleterious	0	probably_damaging	0.998	TCGA-BS-A0UV-01	Uterine Endometrioid Carcinoma	Missense_Mutation		1	11	75283017	75283017	C	A			8	37		51	7802
F382L	deleterious	0	probably_damaging	0.998	TCGA-CF-A47T-01	Bladder Urothelial Carcinoma	Missense_Mutation		1	11	75283017	75283017	C	A			26	23		39	27
P387S	deleterious	0.01	probably_damaging	0.945	TCGA-EE-A2MK-06	Cutaneous Melanoma	Missense_Mutation			11	75283030	75283030	C	T			6	17		10	615
T395I	deleterious	0.01	benign	0.124	TCGA-B5-A3FA-01	Uterine Endometrioid Carcinoma	Missense_Mutation			11	75283055	75283055	C	T			5	6		15	9662
S399F	deleterious	0	probably_damaging	0.999	CSCC-6-T	Cutaneous Squamous Cell Carcinoma	Missense_Mutation			11	75283067	75283067	C	T			15	112		80	1117
S399F	deleterious	0	probably_damaging	0.999	MEL-IPI_Pat16-Tumor-SM-53U3E	Cutaneous Melanoma	Missense_Mutation			11	75283067	75283067	C	T			18	38
L406V	tolerated	0.12	benign	0.259	TCGA-61-2097-01	High-Grade Serous Ovarian Cancer	Missense_Mutation		1	11	75283087	75283087	C	G							39
L406V	tolerated	0.12	benign	0.259	TCGA-61-2097-01	Serous Ovarian Cancer	Missense_Mutation		1	11	75283087	75283087	C	G							39
G411C	deleterious	0	probably_damaging	1	TCGA-FS-A1ZR-06	Cutaneous Melanoma	Missense_Mutation			11	75283102	75283102	G	T			3	15		50	1029

## Sheet: Sheet2
Mutation Type
Fusion
Missense_Mutation
Frame_Shift_Del
In_Frame_Del
