# Supplementary material for: Mutational Hotspots and Protein Interactome Analyses of Collagen-Specific Chaperone&mdash;HSP47
Source: Preprints.org preprint supplement (doi:10.20944/preprints201811.0280.v1), 2018-11-12
Supplement: Supplementary file 5 [file TableS5_HSP47_dbDEPC.xlsx]

## Sheet: Sheet1
dbDEPC	Regulation	Ratio	Cancer type*	Study	Experimental design		Pubmed
ID	change		(Sample type**)		Sample control	Sample case	ID
EXP00661	Up	7.54	AC (TI)	Normal vs. Cancer	adjacent nonmalignant tissue vessels	invasive ductal carcinoma vessels	21401208
EXP00211	Up	1.9	BC (TI)	Treatment (tamoxifen-sensitive vs. tamoxifen-resistant)	tumors were sensitive to tamoxifen therapy	tumors were resistant to therapy	19329653
EXP00230	Up	1.6	BC (CL)	Normal vs. Cancer	normal MCF10A1	low grade MCF10CA1h	20543960
EXP00695	Up	0.59	BC (CL)	Treatment (none vs.adriamycin-resistant)	MCF-7 breast cancer cells	adriamycin-resistant breast cancer MCF-7/ADR cells	23214712
EXP00203	Down	0.07	BC (CL)	Metastasis	precancerous (MCF10AT1)	malignant, metastatic cellular phenotype (MCF10CA1a)	18729497
EXP00410	Down	-2.08	BC (TI)	Treatment (drug-sensitive vs.drug-resistant )	drug sensitive breast cancer tissues	drug resistant breast cancer tissues	22074005
EXP00095	Up		BC (TI)	Metastasis	Tumors That Have Not Metastasized to the Lymph Nodes	Tumors That Have Metastasized to the Lymph Nodes	18257521
EXP00386	Down	0.58	CC (CL)	Treatment (none vs. Zey-treated)	HeLa cells	HeLa cells treated with Zey	26130516
EXP00621	Up		CC (CL)	Treatment (none vs. 6-Shogaol-treated)	human cervical cancer HeLa cells	HeLa cells treated with 6-Shogaol	23243437
EXP00624	Down	0.6	CH (TI)	Cancer vs. Cancer	endophytic type (Type I) tissue samples	exophytic type (Type II) tissue samples	25793716
EXP00707	Up	9.78	CRC (TI)	Normal vs. Cancer	adjacent normal tissues	CRC tumor tissues	26054784
EXP00363	Up	1.84	CRC (TI)	Normal vs. Cancer	noncancerous colonic epithelial tissue	CRC tissue	24381081
EXP00533	Up	1.74	CRC (TI)	Normal vs. Cancer	adjacent normal mucosa	CRC tumour tissue	21808808
EXP00399	Up		CRC (TI)	Normal vs. Cancer	healthy colorectal tissue	colorectal cancer tissue samples	25247386
EXP00517	Up		CRC (TI)	Normal vs. Cancer	their matched normal tissues	colorectal cancer tissues	22154799
EXP00731	Down		GBC (CL)	Metastasis	non-invasive gallbladder cancer cell lines	highly invasive gallbladder cancer cell lines	26530123
EXP00725	Up		GC (TI)	Normal vs. Cancer	adjacent normal gastric tissues	gastric cancer tissues	26398045
EXP00670	Up	3.88	GB (TI)	Normal vs. Cancer	pooled tissue from control subjects	pooled tissue from GBM patients	22219345
EXP00609	Down	0.06	GB (CL)	Cancer vs. Cancer	CD90- cells （which do not exhibit stem-like properties）	CD90+ stem-like cells from glioblastoma multiforme tissue sections	23436586
EXP00404	Up		LC (TI)	Normal vs. Cancer	adjacent non-cancerous tissue	laryngeal cancer tissues	25874882
EXP00387	Up	1.46	NC (TI)	Normal vs. Cancer	adjacent non-tumor tissues	NPC tissues	25648846
EXP00467	Down		NC (CL)	Normal vs. Cancer	nasopharyngeal epithelial cells (NP69 and NP460)	NPC C666-1 cells	25857718
EXP00066	Up	9.1	OC (TI)	Normal vs. Cancer	adjacent non-tumorous tissues	primary oral squamous cell carcinoma (OSCC) lesions	19297561
EXP00422	Down		OC (TI)	Normal vs. Cancer	adjacent normal tissues	OSCC-derived cancer tissue samples	26159854
EXP00730	Up	2.32	HC (TI)	Normal vs. Cancer	non-HCC tissue	HCC tissues	22082227
EXP00145	Up	1.9	HC (CL)	Metastasis	MHCC97L (low metastatic potential) cell line	HCCLM6 (high metastatic potential) cell line	19016532
EXP00465	Down		HC (CL)	Normal vs. Cancer	normal liver cells (human Chang liver cells)	highly metastatic HCC (MHCC97-H) cells	21423987
EXP00631	Up		HC (TI)	Normal vs. Cancer	late-recurrent (LR)-HCC tissues and adjacent nontumor tissues	early-recurrent (ER)-HCC tissues	24967658
EXP00776	Up		HC (TI)	Normal vs. Cancer	normal liver tissues(NL)	HBV-related HCC liver tissues(HCC)	26883192
EXP00625	Up	1.6	CLL (CL)	Cancer vs. Cancer	mutated chronic lymphocytic leukemia (M-CLL) cells	unmutated chronic lymphocytic leukemia (UM-CLL) cells	25645933
EXP00438	Up	4.33	LAC (TI)	Normal vs. Cancer	Normal bronchial epithelium (NBE) tissues	Lung squamous cell carcinoma tissues	23977169
EXP00650	Up	3	LAC (TI)	Normal vs. Cancer	normal bronchial epithelium tissues	human lung squamous tissues carcinoma	22500095
EXP00510	Down	0.3	LAC (TI)	Normal vs. Cancer	atypical hyperplasia or carcinoma in situ tissues	invasive LSCC tissues	22298307
EXP00508	Down	0.23	LAC (TI)	Normal vs. Cancer	normal bronchial epithelium tissues	invasive LSCC tissues	22298307
EXP00509	Down	0.23	LAC (TI)	Normal vs. Cancer	squamous metaplasia tissues	invasive LSCC tissues	22298307
EXP00601	Down		LAC (CL)	Treatment (none vs. G6PD-knockdown)	lung cancer line A549	A549 cells with G6PD knockdown	23742107
EXP00498	Down		NSCLC (CL)	Treatment (miRNA mimic-treated vs. miR-control-treated)	highly metastatic human lung-cancer cell line SPC-A-1sci transfected with the miR-control	SPC-A-1sci cells transfected with the miRNA mimic	25833338
EXP00782	Up		MG (TI)	Normal vs. Cancer	samples collected from normal brain tissues	grade MGI tissue specimens collected from patients radiologically suspected with MGs	25413884
EXP00783	Up		MG (TI)	Normal vs. Cancer	samples collected from normal brain tissues	grade MGII tissue specimens collected from patients radiologically suspected with MGs	25413884
EXP00784	Up		MG (TI)	Normal vs. Cancer	samples collected from normal brain tissues	grade MGIII tissue specimens collected from patients radiologically suspected with MGs	25413884
EXP00785	Up		MG (TI)	Normal vs. Cancer	samples collected from normal brain tissues	grade MGI tissue specimens collected from patients radiologically suspected with MGs	25413884
EXP00786	Up		MG (TI)	Normal vs. Cancer	samples collected from normal brain tissues	grade MGII tissue specimens collected from patients radiologically suspected with MGs	25413884
EXP00787	Up		MG (TI)	Normal vs. Cancer	samples collected from normal brain tissues	grade MGIII tissue specimens collected from patients radiologically suspected with MGs	25413884
EXP00507	Up	1.82	OVC (TI)	Normal vs. Cancer	normal ovarian epithelial tissues	ovarian cancer tissues	22807371
EXP00477	Up		OVC (CL)	Treatment (cisplatin-sensitive vs. cisplatin-resistant)	ovarian cancer cell line A2780	cisplatin-resistant ovarian cancer cell line A2780-DR	25096996
EXP00298	Up	2	PC (TI)	Normal vs. Cancer	adjacent healthy tissue from patients	Samples of pancreatic adenocarcinomas from patients	15526344
EXP00298	Down	0.2	PC (TI)	Normal vs. Cancer	adjacent healthy tissue from patients	Samples of pancreatic adenocarcinomas from patients	15526344
EXP00497	Up		PC (TI)	Normal vs. Cancer	low-grade PAC tissues and adjacent nontumor tissues	high grade pancreatic adenocarcinoma tissues	23851313
EXP00453	Up		PDAC (CL)	Normal vs. Cancer	CD24(-) cells dissected from patient-matched adjacent normal tissues.	CD24(+) adenocarcinoma cells from early stage tumors	23679566
EXP00765	Up	1.89	RCC (TI)	Normal vs. Cancer	adjacent normal renal tissues	tissue samples from primary RCC lesions	24548857
EXP00269	Up		RCC (TI)	Normal vs. Cancer	normal tissues	clear cell renal cell carcinoma (ccRCC) tissues, Grading 1-4	19164279
EXP00558	Down	0.41	UBN (CL)	Cancer vs. Cancer	highly invasive (T24) bladder cancer cells	highly metastatic (T24T) bladder cancer cells	23308193
EXP00579	Down	0.17	UBN (CL)	Normal vs. Cancer	normal bladder epithelial HCV29 cell lines	metastatic bladder cancer cell lines YTS1	26230496

## Sheet: Sheet8
Cancer	Sample Type
Adenocarcinoma	tissue
Breast Cancer	tissue
Breast Cancer	cell line
Breast Cancer	cell line
Breast Cancer	cell line
Breast Cancer	tissue
Breast Cancer	tissue
Cervical Cancer	cell line
Cervical Cancer	cell line
Chordoma	tissue
Colorectal Cancer	tissue
Colorectal Cancer	tissue
Colorectal Cancer	tissue
Colorectal Cancer	tissue
Colorectal Cancer	tissue
Gall Bladder Cancer	cell line
Gastric Cancer	tissue
Glioma(glioblastoma)	tissue
Glioma(glioblastoma)	cell line
Head and Neck Cancer(laryngeal cancer)	tissue
Head and Neck Cancer(nasopharyngeal carcinoma)	tissue
Head and Neck Cancer(nasopharyngeal carcinoma)	cell line
Head and Neck Cancer(oral Cancer)	tissue
Head and Neck Cancer(oral Cancer)	tissue
Hepatocellular Carcinoma	tissue
Hepatocellular Carcinoma	cell line
Hepatocellular Carcinoma	cell line
Hepatocellular Carcinoma	tissue
Hepatocellular Carcinoma	tissue
Leukemia(chronic lymphocytic leukemia)	cell line
Lung Adenocarcinoma	tissue
Lung Adenocarcinoma	tissue
Lung Adenocarcinoma	tissue
Lung Adenocarcinoma	tissue
Lung Adenocarcinoma	tissue
Lung Adenocarcinoma	cell line
Lung Adenocarcinoma(non-small cell lung carcinoma )	cell line
Meningioma	tissue
Meningioma	tissue
Meningioma	tissue
Meningioma	tissue
Meningioma	tissue
Meningioma	tissue
Ovarian Cancer	tissue
Ovarian Cancer	cell line
Pancreatic Carcinoma	tissue
Pancreatic Carcinoma	tissue
Pancreatic Carcinoma	tissue
Pancreatic Carcinoma(pancreatic ductal adenocarcinoma)	cell line
Renal Cell Carcinoma	tissue
Renal Cell Carcinoma	tissue
Urinary Bladder Neoplasms	cell line
Urinary Bladder Neoplasms	cell line

## Sheet: Sheet9
Cancer
Adenocarcinoma
Breast Cancer
Cervical Cancer
Chordoma
Colorectal Cancer
Gall Bladder Cancer
Gastric Cancer
Glioma(glioblastoma)
Head and Neck Cancer(laryngeal cancer)
Head and Neck Cancer(nasopharyngeal carcinoma)
Head and Neck Cancer(oral Cancer)
Hepatocellular Carcinoma
Leukemia(chronic lymphocytic leukemia)
Lung Adenocarcinoma
Lung Adenocarcinoma(non-small cell lung carcinoma )
Meningioma
Ovarian Cancer
Pancreatic Carcinoma
Pancreatic Carcinoma(pancreatic ductal adenocarcinoma)
Renal Cell Carcinoma
Urinary Bladder Neoplasms

## Sheet: Sheet3
Cancer	Pubmed
Adenocarcinoma	21401208
Breast Cancer	18257521
Breast Cancer	18729497
Breast Cancer	19329653
Breast Cancer	20543960
Breast Cancer	22074005
Breast Cancer	23214712
Cervical Cancer	26130516
Cervical Cancer	23243437
Chordoma	25793716
Colorectal Cancer	24381081
Colorectal Cancer	25247386
Colorectal Cancer	22154799
Colorectal Cancer	21808808
Colorectal Cancer	26054784
Gall Bladder Cancer	26530123
Gastric Cancer	26398045
Glioma(glioblastoma)	23436586
Glioma(glioblastoma)	22219345
Head and Neck Cancer(laryngeal cancer)	25874882
Head and Neck Cancer(nasopharyngeal carcinoma)	25648846
Head and Neck Cancer(nasopharyngeal carcinoma)	25857718
Head and Neck Cancer(oral Cancer)	19297561
Head and Neck Cancer(oral Cancer)	26159854
Hepatocellular Carcinoma	19016532
Hepatocellular Carcinoma	21423987
Hepatocellular Carcinoma	24967658
Hepatocellular Carcinoma	22082227
Hepatocellular Carcinoma	26883192
Leukemia(chronic lymphocytic leukemia)	25645933
Lung Adenocarcinoma	23977169
Lung Adenocarcinoma	22298307
Lung Adenocarcinoma	23742107
Lung Adenocarcinoma	22500095
Lung Adenocarcinoma(non-small cell lung carcinoma )	25833338
Meningioma	25413884
Ovarian Cancer	25096996
Ovarian Cancer	22807371
Pancreatic Carcinoma	15526344
Pancreatic Carcinoma	23851313
Pancreatic Carcinoma(pancreatic ductal adenocarcinoma)	23679566
Renal Cell Carcinoma	19164279
Renal Cell Carcinoma	24548857
Urinary Bladder Neoplasms	23308193
Urinary Bladder Neoplasms	26230496

## Sheet: Sheet2
Cancer
Adenocarcinoma
Breast Cancer
Cervical Cancer
Chordoma
Colorectal Cancer
Gall Bladder Cancer
Gastric Cancer
Glioma(glioblastoma)
Head and Neck Cancer(laryngeal cancer)
Head and Neck Cancer(nasopharyngeal carcinoma)
Head and Neck Cancer(oral Cancer)
Hepatocellular Carcinoma
Leukemia(chronic lymphocytic leukemia)
Lung Adenocarcinoma
Lung Adenocarcinoma(non-small cell lung carcinoma )
Meningioma
Ovarian Cancer
Pancreatic Carcinoma
Pancreatic Carcinoma(pancreatic ductal adenocarcinoma)
Renal Cell Carcinoma
Urinary Bladder Neoplasms

## Sheet: Sheet5
Pubmed
21401208
18257521
18729497
19329653
20543960
22074005
23214712
26130516
23243437
25793716
24381081
25247386
22154799
21808808
26054784
26530123
26398045
23436586
22219345
25874882
25648846
25857718
19297561
26159854
19016532
21423987
24967658
22082227
26883192
25645933
23977169
22298307
23742107
22500095
25833338
25413884
25096996
22807371
15526344
23851313
23679566
19164279
24548857
23308193
26230496

## Sheet: Sheet7
Adenocarcinoma
Breast Cancer
Cervical Cancer
Chordoma
Colorectal Cancer
Gall Bladder Cancer
Gastric Cancer
Glioma(glioblastoma)
Head and Neck Cancer(laryngeal cancer)
Head and Neck Cancer(nasopharyngeal carcinoma)
Head and Neck Cancer(oral Cancer)
Hepatocellular Carcinoma
Leukemia(chronic lymphocytic leukemia)
Lung Adenocarcinoma
Lung Adenocarcinoma(non-small cell lung carcinoma )
Meningioma
Ovarian Cancer
Pancreatic Carcinoma
Pancreatic Carcinoma(pancreatic ductal adenocarcinoma)
Renal Cell Carcinoma
Urinary Bladder Neoplasms
